# Supplementary material
Source: PubMed Central journal article supplement (PMC4610816)

## Supporting Information

# Rhodium-Catalyzed Stereoselective Intramolecular [5 + 2] Cycloaddition of 3-Acyloxy-1,4-enyne and Alkene

Xing-zhong Shu,<sup>†</sup> Casi M. Schienebeck,<sup>†</sup> Xiaoxun Li,<sup>†</sup> Xin Zhou,<sup>†</sup> Wangze Song,<sup>†</sup>  
Lianqing Chen,<sup>†</sup> Ilia A. Guzei,<sup>‡</sup> and Weiping Tang<sup>\*,†,‡</sup>

<sup>†</sup>School of Pharmacy, University of Wisconsin-Madison, Madison, 53705, United States;

<sup>‡</sup> Department of Chemistry, University of Wisconsin-Madison, Madison, 53706, United States

E-mail: weiping.tang@wisc.edu

### General Remarks:

All reactions were conducted under a positive pressure of dry argon in glassware that had been oven dried prior to use. Anhydrous solutions of reaction mixtures were transferred via an oven dried syringe or cannula. All solvents were dried prior to use unless noted otherwise. Thin layer chromatography (TLC) was performed using precoated silica gel plates. Flash column chromatography was performed with silica gel. Infrared spectra (IR) were obtained as neat oils. <sup>1</sup>H and <sup>13</sup>C nuclear magnetic resonance spectra (NMR) were recorded in ppm ( $\delta$ ) downfield of TMS ( $\delta = 0$ ) in CDCl<sub>3</sub>. Signal splitting patterns were described as singlet (s), doublet (d), triplet (t), quartet (q), quintet (quint), or multiplet (m), with coupling constants (*J*) in hertz. High resolution mass spectra (HRMS) were performed on an Electron Spray Injection (ESI) TOF mass spectrometer. Enantiomeric excess was determined by chiral HPLC analysis.

## Table of Contents

|                                                                                                                           |            |
|---------------------------------------------------------------------------------------------------------------------------|------------|
| <b>1. Procedures for the preparation of substrates and their characterization data</b>                                    |            |
| 1a and 1g.....                                                                                                            | S3         |
| 1b, 1h, and 3a-3f.....                                                                                                    | S4         |
| 1c and 1d.....                                                                                                            | S8         |
| 1e and 1f.....                                                                                                            | S10        |
| 1i.....                                                                                                                   | S11        |
| 1j.....                                                                                                                   | S13        |
| 1k.....                                                                                                                   | S14        |
| 1l.....                                                                                                                   | S15        |
| (-)-1b, (-)-1m, (-)-1n.....                                                                                               | S15        |
| <b>2. Procedure for the rhodium-catalyzed [5+2] reaction of ACE with alkene and characterization data of the products</b> |            |
| 2a-2l, (-)-2b, (-)-2m, (-)-2n and 4c-4f.....                                                                              | S17        |
| <b>3. Procedures for the synthesis of compounds 5, 6, and 7.....</b>                                                      | <b>S24</b> |
| <b>4. References.....</b>                                                                                                 | <b>S26</b> |
| <b>5. HPLC analysis of chiral compounds.....</b>                                                                          | <b>S27</b> |
| <b>6. X-ray structure of 2n.....</b>                                                                                      | <b>S33</b> |
| <b>7. Copies of proton and carbon NMR spectra.....</b>                                                                    | <b>S51</b> |

**General procedure for the preparation of substrates with a nitrogen linker  
(1a and 1g)**

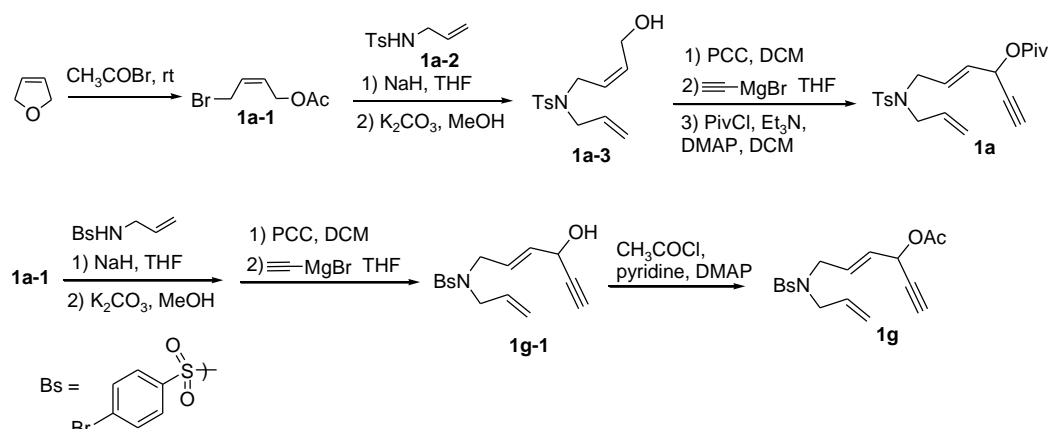

Bromide **1a-1** was prepared in one step according to the literature procedure.<sup>1</sup> To a stirred solution of NaH (480 mg, 12.0 mmol, 60% in mineral oil) in THF (50 mL) at 0 °C was added sulfonamide **1a-2** (2.11 g, 10.0 mmol) under argon atmosphere. After stirring at rt for 0.5 h, compound **1a-1** (2.11 g, 11.0 mmol) in THF (10 mL) was added. The reaction mixture was allowed to stir overnight. The reaction was quenched with  $\text{H}_2\text{O}$ . The mixture was diluted with ethyl acetate, washed with  $\text{H}_2\text{O}$ , brine, dried over anhydrous  $\text{Na}_2\text{SO}_4$ , and concentrated under reduced pressure. The residue was dissolved with methanol (60 mL), and  $\text{K}_2\text{CO}_3$  (4.14 g, 30 mmol) was added at room temperature. After stirring at room temperature for 1 h, most of solvent was removed under reduced pressure. The residue was diluted with ethyl acetate (70 mL), washed with  $\text{H}_2\text{O}$ , brine, dried over anhydrous  $\text{Na}_2\text{SO}_4$ , and concentrated in vacuo. The residue was purified by column chromatography (silica gel, hexane/ethyl acetate 4:1) to afford alcohol **1a-3** (2.14 g, 7.6 mmol) in 76% yield over 2 steps. Product **1a** (1.89 g, 4.86 mmol) was obtained in 64% yield over three steps from **1a-3** according to known procedures.<sup>2</sup>

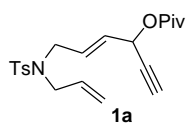

(E)-6-(N-allyl-N-tosylamino)hex-4-en-1-yn-3-yl pivalate (**1a**).

Oil,  $^1\text{H}$  NMR (400 MHz,  $\text{CDCl}_3$ )  $\delta$  1.20 (s, 9H), 2.43 (s, 3H), 2.51 (d,  $J = 2.0$  Hz, 1H), 3.79 (d,  $J = 6.4$  Hz, 2H), 3.85 (d,  $J = 6.0$  Hz, 2H), 5.12-5.17 (m, 2H), 5.55-5.66 (m, 2H), 5.73-5.80 (m, 2H), 7.30 (dd,  $J = 0.8, 8.4$  Hz, 2H), 7.70 (d,  $J = 8.0$  Hz, 2H);  $^{13}\text{C}$  NMR (100 MHz,  $\text{CDCl}_3$ )  $\delta$  21.7, 27.2, 38.9, 47.9, 49.9, 62.9, 75.1, 79.3, 119.5, 127.4, 129.2, 129.5, 130.0, 132.7, 137.4, 143.6, 177.1. IR (film): 3268, 2974, 2932, 1731, 1479, 1341, 1273, 1140, 1090, 1031, 970  $\text{cm}^{-1}$ . HRMS (ESI)  $m/z$  calcd. For  $\text{C}_{21}\text{H}_{27}\text{NO}_4\text{S}$  ( $\text{M}+\text{Na}$ )<sup>+</sup> 412.1553, found 412.1546.

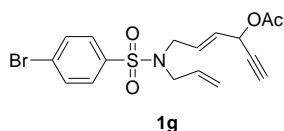

(*E*)-Acetic acid 4-[allyl-(4-bromo-benzenesulfonyl)-amino]-1-ethynyl-but-2-enyl ester (**1g**).

Substrate **1g** was prepared in five steps (30.8 mg, 55% yield) according to procedures similar to **1a**.

Oil.  $^1\text{H}$  NMR (500Mz,  $\text{CDCl}_3$ )  $\delta$  2.09 (s, 3H), 2.56 (d,  $J = 2.0$  Hz, 1H), 3.81 (d,  $J = 6.0$  Hz, 2H), 3.86 (d,  $J = 6.5$  Hz, 2H), 5.16 (qd,  $J = 1.3, 16.8$  Hz, 1H), 5.19 (qd,  $J = 1.3, 9.9$  Hz, 1H), 5.61 (tdd,  $J = 6.0, 10.5, 17.0$  Hz, 1H), 5.64 (tdd,  $J = 1.3, 5.7, 15.3$  Hz, 1H), 5.76 (dtd,  $J = 1.2, 6.3, 15.3$  Hz, 1H), 5.81-5.79 (m, 1H), 7.70-7.64 (m, 4H).  $^{13}\text{C}$  NMR (125Mz,  $\text{CDCl}_3$ )  $\delta$  21.2, 47.8, 50.0, 63.1, 75.7, 79.0, 119.9, 127.8, 129.0, 129.3, 129.5, 132.4, 132.7, 139.7, 169.7. IR (film): 2918, 1738, 1574, 1389, 1370, 1343, 1224, 1161, 1089, 1069, 1009, 970, 908, 823, 763, 728, 669  $\text{cm}^{-1}$ . HRMS (ESI)  $m/z$  calcd. For  $\text{C}_{17}\text{H}_{18}\text{BrNO}_4\text{S}$  ( $\text{M}+\text{Na}$ ) $^+$  434.0032, found 434.0022.

**General procedure for the preparation of substrates with a gem-diester or gem-dinitrile linker (1b, 1h, 3a, 3b, 3c, 3d, 3e, and 3f).**

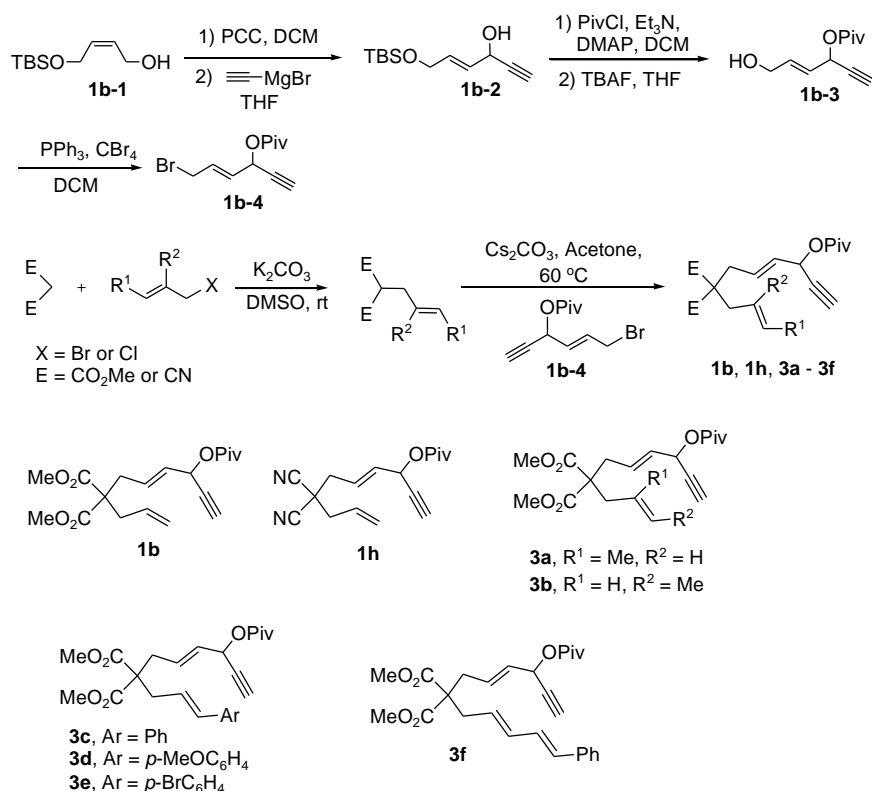

### Synthesis of bromide **1b-4**.

To a suspension of PCC (6.46 g, 30 mmol) and 4 Å MS (1 g, 50mg/mmol) in  $\text{CH}_2\text{Cl}_2$  (100 mL) was added a solution of compound **1b-1** (4.04 g, 20 mmol) in dry  $\text{CH}_2\text{Cl}_2$  (40 mL) at 0 °C. The mixture was stirred at room temperature for 2.5 h. It was then poured into  $\text{Et}_2\text{O}$  (150 mL). The mixed solution was filtered through silica gel and the filtrate

was concentrated under reduced pressure to yield the crude aldehyde for the next step without purification.

To a stirred solution of ethynylmagnesium bromide solution (48 mL, 24 mmol, 0.5 M in THF) was added a solution of above crude aldehyde in THF (40 mL) at room temperature. When the reaction was completed as determined by TLC analysis, the reaction mixture was quenched by addition of saturated aqueous ammonium chloride (60 mL) and extracted with ethyl ether (2×60 mL). The combined organic layers were washed with H<sub>2</sub>O, brine, dried over anhydrous Na<sub>2</sub>SO<sub>4</sub>, and concentrated under reduced pressure, the residue was purified by flash column chromatography (silica gel, hexane/ethyl acetate 10:1) to obtain the desired propargylic alcohol **1b-2** (3.27 g, 14.5 mmol) in 72% yield for 2 steps.

To a stirred solution of propargylic alcohol **1b-2** (3.27 g, 14.5 mmol) in CH<sub>2</sub>Cl<sub>2</sub> (80 mL) was added triethylamine (4.39 g, 43.5 mmol), pivaloyl chloride (2.09 g, 17.4 mmol), and DMAP (5 mol %) at room temperature. The resultant mixture was stirred overnight, washed with water, brine, dried over anhydrous Na<sub>2</sub>SO<sub>4</sub>, and concentrated under reduced pressure to give the crude pivalate product for the next step without purification.

To a stirred solution of above pivalate compound in THF (60 mL) was added a solution of tetrabutylammonium fluoride (21 mL, 21 mmol, 1.0M in THF) at 0 °C. The mixture was stirred at room temperature for 2 h. The solvent was removed under reduced pressure, and the residue was diluted with ethyl acetate, washed with H<sub>2</sub>O, brine, dried over anhydrous MgSO<sub>4</sub>, and concentrated under reduced pressure. The residue was purified by flash column chromatography (silica gel, hexane/ethyl acetate 4:1) to obtain the alcohol **1b-3** (2.29 g, 11.7 mmol) in 81% yield for 2 steps.

To a solution of alcohol **1b-3** (2.29 g, 11.7 mmol) in CH<sub>2</sub>Cl<sub>2</sub> (80 mL) was added tetrabromomethane (5.72 g, 17.5 mmol) and triphenylphosphine (4.58 g, 17.5 mmol) at 0°C. The reaction mixture was stirred for 1 h at room temperature before silica was added and the solvents were removed under reduced pressure. The residue was purified through silica gel column chromatography (silica gel, hexane/ethyl acetate 20:1) to afford the corresponding bromide **1b-4** (2.73 g, 10.6 mmol) in 91% yield.

### Synthesis of substrate **1b**.

To a solution of dimethyl malonate (1.32 g, 10 mmol) in DMSO (50 mL), K<sub>2</sub>CO<sub>3</sub> (2.07 g, 15 mmol) was added at 0 °C and stirred for 10 min. Then allyl bromide (1.44 g, 12 mmol) was added slowly and the reaction mixture was stirred at rt overnight. Ethyl acetate was added to the reaction mixture. It was washed three times with water and brine, dried over anhydrous Na<sub>2</sub>SO<sub>4</sub>, and concentrated under reduced pressure. The residue was purified through silica gel column chromatography (silica gel, hexane/ethyl acetate 10:1) to give 2-allylmalonate (1.44 g, 8.4 mmol) in 84% yield.

To a stirred solution of 2-allylmalonate (172 mg, 1 mmol) and cesium carbonate (650 mg, 2.0 mmol) in dry acetone (4 mL) was added bromide **1b-4** (387 mg, 1.5 mmol). The resulting mixture was heated to 60°C and stirred overnight. The residue was filtered

through a short pad of silica gel and the filtrate was concentrated under reduced pressure. The crude product was purified by silica gel column chromatography (10:1 Hex/EtOAc) to afford **1b** (304 mg, 0.87 mmol) in 87% yield as an oil.

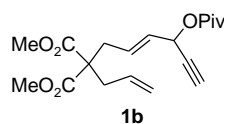

Dimethyl 2-allyl-2-((*E*)-4-(pivaloyloxy)hex-2-en-5-ynyl)malonate (**1b**).

$^1\text{H}$  NMR (400 MHz,  $\text{CDCl}_3$ )  $\delta$  1.21 (s, 9H), 2.52 (d,  $J = 2.0$  Hz, 1H), 2.62-2.67 (m, 4H), 3.72 (s, 6H), 5.09-5.14 (m, 2H), 5.59-5.66 (m, 2H), 5.77-5.87 (m, 2H);  $^{13}\text{C}$  NMR (100 MHz,  $\text{CDCl}_3$ )  $\delta$  27.2, 35.4, 37.4, 38.9, 52.7, 57.7, 63.5, 74.8, 79.8, 119.7, 129.4, 129.7, 132.2, 171.1, 177.1. IR (film): 3275, 2975, 1730, 1437, 1274, 1212, 1138, 1031, 925  $\text{cm}^{-1}$ . HRMS (ESI)  $m/z$  calcd. For  $\text{C}_{19}\text{H}_{26}\text{O}_6$  ( $\text{M}+\text{Na}$ ) $^+$  373.1622, found 373.1617.

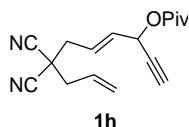

(*E*)-7,7-dicyanodeca-4,9-dien-1-yn-3-yl pivalate (**1h**).

Compound **1h** (146 mg, 0.51 mmol) was prepared in two steps and 46% yield from malononitrile, allyl bromide, and bromide **1b-4** according to procedures described for **1b**. Oil,  $^1\text{H}$  NMR (400 MHz,  $\text{CDCl}_3$ )  $\delta$  1.23 (s, 9H), 2.60 (d,  $J = 2.0$  Hz, 1H), 2.68 (d,  $J = 7.2$  Hz, 2H), 2.73 (d,  $J = 7.2$  Hz, 2H), 5.39-5.47 (m, 2H), 5.83-5.94 (m, 3H), 6.07 (dtd,  $J = 3.2, 7.6, 18.0$  Hz, 1H);  $^{13}\text{C}$  NMR (100 MHz,  $\text{CDCl}_3$ )  $\delta$  27.2, 37.2, 39.0, 39.2, 41.0, 62.8, 75.7, 78.8, 114.7, 114.8, 123.8, 125.1, 128.4, 133.5, 177.1. IR (film): 3295, 2976, 2911, 1731, 1479, 1273, 1139, 969  $\text{cm}^{-1}$ . HRMS (ESI)  $m/z$  calcd. For  $\text{C}_{17}\text{H}_{20}\text{N}_2\text{O}_2$  ( $\text{M}+\text{Na}$ ) $^+$  307.1417, found 307.1406.

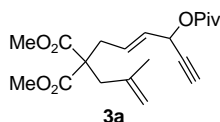

Dimethyl 2-(2-methylallyl)-2-((*E*)-4-(pivaloyloxy)hex-2-en-5-ynyl)malonate (**3a**).

Compound **3a** (287 mg, 0.79 mmol) was prepared in two steps and 69% yield from dimethyl malonate and 3-bromo-2-methylprop-1-ene according to procedures described for **1b**. Oil,  $^1\text{H}$  NMR (400 MHz,  $\text{CDCl}_3$ )  $\delta$  1.21 (s, 9H), 1.65 (s, 3H), 2.52 (d,  $J = 2.4$  Hz, 1H), 2.67-2.71 (m, 4H), 3.72 (s, 6H), 4.71-4.80 (m, 1H), 4.88-4.89 (m, 1H), 5.60 (tdd,  $J = 1.2, 6.4, 15.2$  Hz, 1H), 5.77 (ddd,  $J = 1.2, 2.0, 6.0$  Hz, 1H), 5.86 (dtd,  $J = 1.2, 7.6, 8.4$  Hz, 1H);  $^{13}\text{C}$  NMR (100 MHz,  $\text{CDCl}_3$ )  $\delta$  23.3, 27.2, 35.5, 38.9, 40.8, 52.66, 52.68, 57.4, 63.5, 74.8, 79.9, 116.2, 129.3, 130.1, 140.4, 171.5, 177.2. IR (film): 3271, 2973, 2361, 1731, 1436, 1272, 1201, 1178, 1140, 1063, 1031, 972  $\text{cm}^{-1}$ . HRMS (ESI)  $m/z$  calcd. For  $\text{C}_{20}\text{H}_{28}\text{O}_6$  ( $\text{M}+\text{Na}$ ) $^+$  387.1778, found 387.1762.

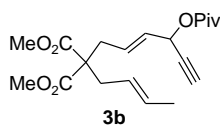

Dimethyl 2-((*E*)-but-2-enyl)-2-((*E*)-4-(pivaloyloxy)hex-2-en-5-ynyl)malonate (**3b**).

Compound **3b** (299 mg, 0.82 mmol) was prepared in two steps and 75% yield from dimethyl malonate and (*E*)-1-bromobut-2-ene according to procedures described for **1b**. Oil, <sup>1</sup>H NMR (400 MHz, CDCl<sub>3</sub>) δ 1.21 (s, 9H), 1.61-1.67 (m, 3H), 2.52 (t, *J* = 2.0 Hz, 1H), 2.55-2.57 (m, 2H), 2.64 (t, *J* = 6.8 Hz, 2H), 3.71 (s, 6H), 5.18-5.26 (m, 1H), 5.48-5.63 (m, 2H), 5.76-5.87 (m, 2H). <sup>13</sup>C NMR (100 MHz, CDCl<sub>3</sub>) δ 18.3, 27.2, 35.4, 36.2, 38.9, 52.6, 58.0, 63.5, 74.8, 79.8, 124.4, 129.2, 130.0, 130.5, 171.3, 177.2. IR (film): 3290, 2956, 2360, 2341, 1731, 1437, 1271, 1203, 1140, 1031, 969 cm<sup>-1</sup>. HRMS (ESI) *m/z* calcd. For C<sub>20</sub>H<sub>28</sub>O<sub>6</sub> (M+Na)<sup>+</sup> 387.1778, found 387.1766.

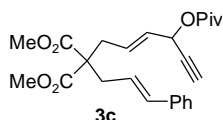

Dimethyl 2-cinnamyl-2-((*E*)-4-(pivaloyloxy)hex-2-en-5-ynyl)malonate (**3c**).

Compound **3c** (215 mg, 0.5 mmol) was prepared in two steps and 57% yield from dimethyl malonate and (*trans*)-cinnamyl chloride according to procedures described for **1b**. Oil, <sup>1</sup>H NMR (400 MHz, CDCl<sub>3</sub>) δ 1.22 (s, 9H), 2.53 (d, *J* = 2.4 Hz, 1H), 2.71 (d, *J* = 7.6 Hz, 2H), 2.79 (dd, *J* = 1.2, 7.6 Hz, 2H), 3.74 (s, 6H), 5.64 (tdd, *J* = 1.2, 6.4, 15.2 Hz, 1H), 5.79-5.81 (m, 1H), 5.88 (dtd, *J* = 1.2, 7.6, 8.8 Hz, 1H), 6.00 (td, *J* = 7.6, 15.6 Hz, 1H), 6.45 (d, *J* = 16.0 Hz, 1H), 7.20-7.34 (m, 5H); <sup>13</sup>C NMR (125 MHz, CDCl<sub>3</sub>) δ 27.2, 35.8, 36.8, 39.0, 52.775, 52.783, 58.1, 63.5, 74.9, 79.9, 123.7, 126.5, 127.7, 128.8, 129.5, 129.8, 134.6, 137.2, 171.2, 177.2. IR (film): 3284, 2956, 1730, 1479, 1436, 1271, 1199, 1139, 1030, 967 cm<sup>-1</sup>. HRMS (ESI) *m/z* calcd. For C<sub>25</sub>H<sub>30</sub>O<sub>6</sub> (M+Na)<sup>+</sup> 449.1935, found 449.1920.

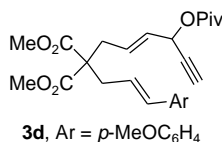

Dimethyl 2-(4-methoxycinnamyl)-2-((*E*)-4-(pivaloyloxy)hex-2-en-5-ynyl)malonate (**3d**).

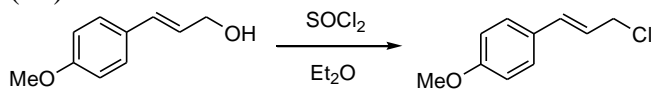

To a solution of (*E*)-3-(4-methoxyphenyl)prop-2-en-1-ol (328 mg, 2 mmol) in diethyl ether (2 ml, 1ml/mmol) at 0 °C was slowly added SOCl<sub>2</sub> (283 mg, 2.4 mmol). The reaction mixture was stirred until completion, as determined by TLC. The resulting solution was then diluted with diethyl ether (30 ml), washed with a saturated solution of NaHCO<sub>3</sub>, brine, dried over Na<sub>2</sub>SO<sub>4</sub>. The solvent was removed under reduced pressure to give crude allylic chloride for the next step without further purification.

Compound **3d** (355 mg, 0.78 mmol, 39% yield for 3 steps) was prepared from dimethyl malonate and the above chloride according to procedures described for **1b**. Oil, <sup>1</sup>H NMR (400 MHz, CDCl<sub>3</sub>) δ 1.22 (s, 9H), 2.53 (d, *J* = 2.0 Hz, 1H), 2.70 (d, *J* = 7.6 Hz, 2H), 2.76 (dd, *J* = 1.2, 7.6 Hz, 2H), 3.73 (s, 6H), 3.80 (s, 3H), 5.63 (dd, *J* = 6.4, 15.2 Hz, 1H), 5.79-5.91 (m, 3H), 6.39 (d, *J* = 15.6 Hz, 1H), 6.83 (d, *J* = 8.8 Hz, 2H), 7.25

(d,  $J = 9.2$  Hz, 2H);  $^{13}\text{C}$  NMR (100 MHz,  $\text{CDCl}_3$ )  $\delta$  27.2, 35.7, 36.8, 38.9, 52.7, 55.5, 58.1, 63.5, 74.9, 79.9, 114.2, 121.4, 127.6, 129.4, 129.9, 130.0, 134.0, 159.4, 171.2, 177.2. IR (film): 3286, 2956, 2359, 1730, 1607, 1510, 1438, 1272, 1246, 1200, 1174, 1140, 1032, 968  $\text{cm}^{-1}$ . HRMS (ESI)  $m/z$  calcd. For  $\text{C}_{26}\text{H}_{32}\text{O}_7$  ( $\text{M}+\text{Na}$ ) $^+$  479.2040, found 479.2036.

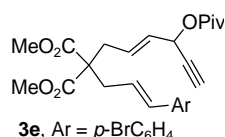

Dimethyl 2-(4-bromocinnamyl)-2-((*E*)-4-(pivaloyloxy)hex-2-en-5-ynyl)malonate (**3e**). Compound **3e** (215 mg, 0.43 mmol, 34% yield for 3 steps) was prepared according to above procedures described for **3d**.

Oil,  $^1\text{H}$  NMR (400 MHz,  $\text{CDCl}_3$ )  $\delta$  1.21 (s, 9H), 2.53 (d,  $J = 2.0$  Hz, 1H), 2.69 (d,  $J = 7.6$  Hz, 2H), 2.77 (dd,  $J = 1.2, 7.6$  Hz, 2H), 3.73 (s, 6H), 5.60-5.66 (m, 1H), 5.78-5.81 (m, 1H), 5.86 (dtd,  $J = 1.2, 7.6, 8.4$  Hz, 1H), 6.00 (td,  $J = 7.6, 15.6$  Hz, 1H), 6.38 (d,  $J = 15.6$  Hz, 1H), 7.18 (d,  $J = 8.4$  Hz, 2H), 7.41 (d,  $J = 8.4$  Hz, 2H);  $^{13}\text{C}$  NMR (100 MHz,  $\text{CDCl}_3$ )  $\delta$  27.2, 35.9, 36.8, 39.0, 52.8, 58.0, 63.5, 74.9, 79.8, 121.5, 124.7, 128.0, 129.6, 129.7, 131.9, 133.4, 136.1, 171.1, 177.2. IR (film): 3277, 2956, 2360, 1731, 1486, 1434, 1275, 1233, 1200, 1141, 1072, 1030, 1008, 969  $\text{cm}^{-1}$ . HRMS (ESI)  $m/z$  calcd. For  $\text{C}_{25}\text{H}_{29}\text{BrO}_6$  ( $\text{M}+\text{Na}$ ) $^+$  527.1040, found 527.1048.

### General procedure for the preparation substrates with an oxygen linker (**1c** and **1d**).

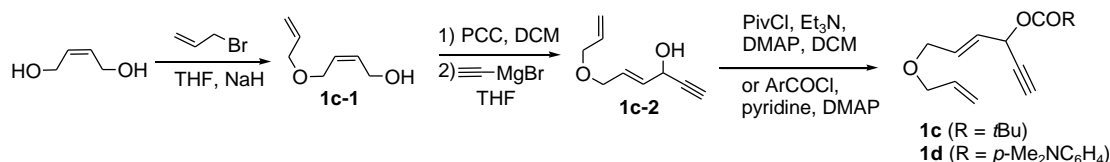

To a suspension solution of sodium hydride (960 mg, 24 mmol, 60% suspension in mineral oil) in THF (80 mL) at 0 °C was added a solution of *cis*-but-2-ene-1,4-diol (1.76g, 20 mmol) in dry THF (10 mL). The mixture was stirred at room temperature for 1 h, then allyl bromide (2.4 g, 20 mmol) in dry THF (10 mL) was quickly added and the reaction was refluxed overnight. Upon cooling, the reaction was quenched with H<sub>2</sub>O, extracted with diethyl ether. The combined organic layers were washed with brine, dried over anhydrous Na<sub>2</sub>SO<sub>4</sub>, and concentrated under reduced pressure. The residue was purified by flash column chromatography (silica gel, hexane/ethyl acetate 2:1) to give alcohol **1c-1** (2.10 g, 16.4 mmol) in 82% yield.

To a suspension of PCC (5.29 g, 24.6 mmol) and 4 Å MS (820 mg, 50mg/mmol) in  $\text{CH}_2\text{Cl}_2$  (100 mL) was added a solution of alcohol **1c-1** (2.10 g, 16.4 mmol) in dry  $\text{CH}_2\text{Cl}_2$  (20 mL) at 0 °C under Ar. The mixture was stirred at room temperature for 2 h. It was then poured into diethyl ether (200 mL). The mixture solution was filtered through a pad of silica gel and the filtrate was concentrated under reduced pressure to yield the crude aldehyde for next step without purification.



To a stirred solution of ethynylmagnesium bromide (39.4 mL, 19.7 mmol, 0.5 M in THF) in THF was added a solution of the above crude aldehyde in THF (20 mL) at room temperature. When the reaction was completed as determined by TLC analysis, the reaction mixture was quenched by addition of saturated aqueous ammonium chloride (60 mL) and extracted with diethyl ether (2×60 mL). The combined organic layers were washed with H<sub>2</sub>O, brine, dried over anhydrous Na<sub>2</sub>SO<sub>4</sub>, and concentrated under reduced pressure. The residue was purified by flash column chromatography (silica gel, hexane/ethyl acetate 4:1) to give propargylic alcohol **1c-2** (1.82 g, 12.0 mmol) in 73% yield.

To a stirred solution of propargylic alcohol **1c-2** (608 mg, 4.0 mmol) in CH<sub>2</sub>Cl<sub>2</sub> (40 mL) was added triethylamine (1.21 g, 12.0 mmol), pivaloyl chloride (624 mg, 5.2 mmol), and DMAP (5 mol %) at room temperature. The resulting mixture was stirred overnight, diluted with CH<sub>2</sub>Cl<sub>2</sub> (40 mL), washed with water, brine, and dried over anhydrous Na<sub>2</sub>SO<sub>4</sub>. The solvent was removed under reduced pressure and the residue was purified by flash column chromatography (silica gel, hexane/ethyl acetate 20:1) to obtain the propargylic esters **1c** (849 mg, 3.6 mmol) in 90% yield as an oil.

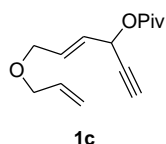

(*E*)-6-(allyloxy)hex-4-en-1-yn-3-yl pivalate (**1c**).

<sup>1</sup>H NMR (400 MHz, CDCl<sub>3</sub>) δ 1.22 (s, 9H), 2.54 (d, *J* = 2.0 Hz, 1H), 4.00 (td, *J* = 1.6, 5.6 Hz, 2H), 4.03-4.05 (m, 2H), 5.18-5.32 (m, 2H), 5.78-5.97 (m, 3H), 6.09 (dtd, *J* = 1.2, 5.2, 15.2 Hz, 1H); <sup>13</sup>C NMR (100 MHz, CDCl<sub>3</sub>) δ 27.2, 39.0, 63.3, 69.5, 71.6, 75.0, 79.7, 117.5, 126.8, 131.7, 134.7, 177.3. IR (film): 3294, 2957, 2854, 1731, 1479, 1273, 1139, 1030, 964 cm<sup>-1</sup>. HRMS (ESI) *m/z* calcd. For C<sub>14</sub>H<sub>20</sub>O<sub>3</sub> (M+Na)<sup>+</sup> 259.1305, found 259.1296.

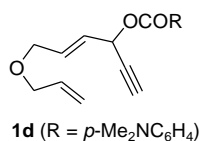

(*E*)-6-(allyloxy)hex-4-en-1-yn-3-yl 4-(dimethylamino)benzoate (**1d**).

To a stirred solution of propargylic alcohol **1c-2** (608 mg, 4.0 mmol) in pyridine (20 mL) at rt was added the hydrochloric salt of 4-(dimethylamino)benzoyl chloride (1.31 g, 6.0 mmol) and DMAP (48.8 mg, 0.4 mmol). The reaction mixture was stirred at rt overnight. Most volatile solvents were removed under reduced pressure and the residue was diluted with ethyl acetate (70 mL). The mixture solution was washed with an aqueous solution of CuSO<sub>4</sub>·5H<sub>2</sub>O, brine, dried over anhydrous Na<sub>2</sub>SO<sub>4</sub>, and concentrated under reduced pressure. The residue was purified by flash column chromatography (silica gel, hexane/ethyl acetate 10:1) to obtain the propargylic esters **1d** (741 mg, 2.48 mmol) in 62% yield as an oil.

<sup>1</sup>H NMR (500 MHz, CDCl<sub>3</sub>) δ 2.58 (d, *J* = 2.0 Hz, 1H), 3.04 (s, 6H), 4.01 (td, *J* = 1.5,

5.5 Hz, 2H), 4.05-4.06 (m, 2H), 5.18-5.21 (m, 1H), 5.27-5.31 (m, 1H), 5.88-5.96 (m, 2H), 6.12-6.19 (m, 2H), 6.63 (d,  $J = 9.0$  Hz, 2H), 7.93 (d,  $J = 9.0$  Hz, 2H);  $^{13}\text{C}$  NMR (125 MHz,  $\text{CDCl}_3$ )  $\delta$  40.3, 63.2, 69.6, 71.7, 75.0, 80.2, 110.9, 116.4, 117.5, 127.4, 131.6, 131.9, 134.8, 153.8, 165.8. IR (film): 3304, 2913, 2857, 1701, 1605, 1527, 1369, 1264, 1181, 1090, 946  $\text{cm}^{-1}$ . HRMS (ESI)  $m/z$  calcd. For  $\text{C}_{18}\text{H}_{21}\text{NO}_3$  ( $\text{M}+\text{Na}$ ) $^+$  322.1414, found 322.1413.

### General procedure for the preparation of substrates with an all carbon linker (1e and 1f).

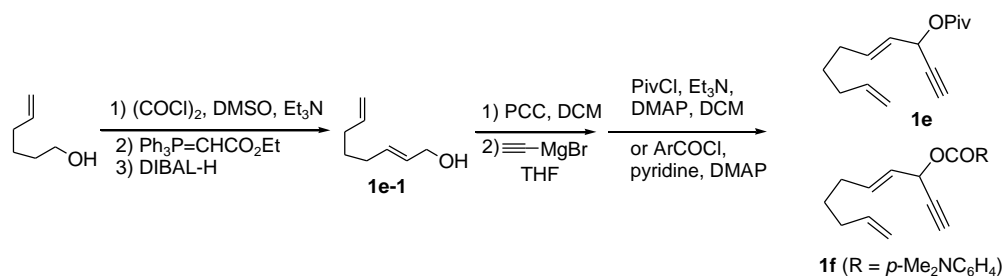

To a solution of  $(\text{COCl})_2$  (1.51 g, 12.0 mmol) in  $\text{CH}_2\text{Cl}_2$  (60 ml) at  $-78^\circ\text{C}$  was added a solution of DMSO (1.87 g, 24 mmol) in  $\text{CH}_2\text{Cl}_2$  (10 ml). After 30 min, 5-hexen-1-ol (1.0 g, 10 mmol) in  $\text{CH}_2\text{Cl}_2$  (10 ml) was added and the solution was stirred at  $-78^\circ\text{C}$  for 1.5 h.  $\text{Et}_3\text{N}$  (5.05 g, 50 mmol) in  $\text{CH}_2\text{Cl}_2$  (10 ml) was then added and the solution was warmed to rt. After 30 min the mixture solution was diluted with  $\text{CH}_2\text{Cl}_2$  (50 ml), washed with saturated aqueous solution of sodium bicarbonate (50 ml), brine and dried over anhydrous  $\text{Na}_2\text{SO}_4$ . the solvent was removed under reduced pressure and the residue was dissolved in  $\text{CH}_2\text{Cl}_2$  (70 ml).

To above crude aldehyde solution was added  $\text{Ph}_3\text{P}=\text{CHCO}_2\text{Et}$  (5.22 g, 15 mmol). The reaction solution was stirred at rt overnight. Most of solvent was removed under reduced pressure and the residue was triturated with  $\text{Et}_2\text{O}$  (250 ml) to precipitate triphenylphosphine oxide. Concentration of the filtrate under reduced pressure gave crude ester for the next step without purification.

To a solution of above residue in  $\text{CH}_2\text{Cl}_2$  (60 mL) at  $-78^\circ\text{C}$  was added DIBALH (30 mL, 30 mmol, 1 M solution in hexane). The reaction mixture was stirred for 3 h, 10% aqueous solution of NaOH was then added carefully to quench the reaction. The mixture solution was filtered with a pad of silica gel and washed with  $\text{CH}_2\text{Cl}_2$ . The filtrate was concentrated in vacuum and the residue was purified by flash column chromatography (silica gel, hexane/ethyl acetate 4:1) to give compound **1e-1** (743 mg, 5.9 mmol) in 59% yield for 3 steps.

Product **1e** (295 mg, 1.26 mmol) was obtained in 63% yield over three steps from **1e-1** according to procedures described for the conversion of **1c-1** to **1c**.

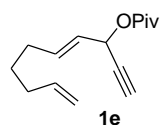

(*E*)-deca-4,9-dien-1-yn-3-yl pivalate (**1e**).

Oil,  $^1\text{H}$  NMR (400 MHz,  $\text{CDCl}_3$ )  $\delta$  1.21 (s, 9H), 1.47-1.54 (m, 2H), 2.03-2.13 (m, 4H),

2.52 (d,  $J = 2.4$  Hz, 1H), 4.94-5.04 (m, 2H), 5.54 (tdd,  $J = 1.6, 6.4, 15.2$  Hz, 1H), 5.74-5.84 (m, 2H), 5.98 (dtd,  $J = 1.2, 6.8, 15.2$  Hz, 1H),  $^{13}\text{C}$  NMR (100 MHz,  $\text{CDCl}_3$ )  $\delta$  27.2, 28.1, 31.6, 33.3, 38.9, 64.0, 74.6, 80.4, 115.0, 125.2, 136.3, 138.6, 177.4. IR (film): 3297, 2975, 2932, 1731, 1479, 1397, 1273, 1140, 1030, 966  $\text{cm}^{-1}$ . HRMS (ESI)  $m/z$  calcd. For  $\text{C}_{15}\text{H}_{22}\text{O}_2$  ( $\text{M}+\text{Na}$ ) $^+$  257.1512, found 257.1510.

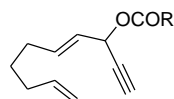

**1f** ( $\text{R} = p\text{-Me}_2\text{NC}_6\text{H}_4$ )

(*E*)-deca-4,9-dien-1-yn-3-yl 4-(dimethylamino)benzoate (**1f**).

Product **1f** (247 mg, 0.84 mmol) was obtained in 42% yield over three steps from **1e-1** according to procedures described for **1d**.

Oil,  $^1\text{H}$  NMR (500 MHz,  $\text{CDCl}_3$ )  $\delta$  1.49-1.55 (m, 2H), 2.05-2.14 (m, 4H), 2.56 (d,  $J = 2.0$  Hz, 1H), 3.03 (s, 6H), 4.94-5.03 (m, 2H), 5.64-5.69 (m, 1H), 5.79 (tdd,  $J = 6.5, 10.0, 17.0$  Hz, 1H), 6.03-6.09 (m, 2H), 6.63 (d,  $J = 9.0$  Hz, 2H), 7.93 (d,  $J = 9.0$  Hz, 2H);  $^{13}\text{C}$  NMR (125 MHz,  $\text{CDCl}_3$ )  $\delta$  28.1, 31.6, 33.4, 40.3, 63.8, 74.6, 80.8, 110.9, 115.0, 116.6, 125.6, 131.8, 136.1, 138.7, 153.7, 165.9. IR (film): 3295, 2927, 2857, 1701, 1605, 1525, 1368, 1317, 1262, 1180, 1089, 945  $\text{cm}^{-1}$ . HRMS (ESI)  $m/z$  calcd. For  $\text{C}_{19}\text{H}_{23}\text{NO}_2$  ( $\text{M}+\text{Na}$ ) $^+$  320.1621, found 320.1610.

### Procedure for the preparation of ester substituted substrate **1i**.

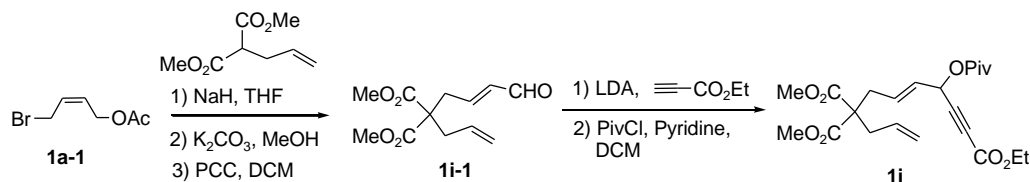

To a stirred solution of NaH (600 mg, 15 mmol, 60% in mineral oil) in THF (30 mL) at 0 °C was added allyl dimethylmalonate (2.84 g, 16.5 mmol) under argon atmosphere. After stirring at rt for 0.5 h, compound **1a-1** (2.86 g, 15 mmol) in THF (10 mL) was added. The reaction mixture was allowed to stir overnight. The reaction was quenched with  $\text{H}_2\text{O}$ . The mixture was diluted with ethyl acetate, washed with  $\text{H}_2\text{O}$ , brine, dried over anhydrous  $\text{Na}_2\text{SO}_4$ , and concentrated under reduced pressure. The residue was dissolved in methanol (15 mL), and  $\text{K}_2\text{CO}_3$  (2.28 g, 16.5 mmol) was added at room temperature. After stirring at room temperature for 1 h, most of solvent was removed under reduced pressure. The residue was diluted with ethyl acetate (20 mL), washed with  $\text{H}_2\text{O}$ , brine, dried over anhydrous  $\text{Na}_2\text{SO}_4$ , and concentrated in vacuo. The residue was purified by column chromatography (silica gel, hexane/ethyl acetate 4:1) to afford an alcohol (2.18 g, 9 mmol) in 61% yield over 2 steps.

To a suspension of PCC (2.90 g, 13.5 mmol) in  $\text{CH}_2\text{Cl}_2$  (20 mL) was added a solution of the above alcohol (2.18 g, 9 mmol) in dry  $\text{CH}_2\text{Cl}_2$  (20 mL) at 0 °C under Ar. The mixture was stirred at room temperature for 4 h. It was then poured into  $\text{Et}_2\text{O}$  (60 mL). The mixed solution was filtered through silica gel and the filtrate was concentrated under

reduced pressure to yield the crude aldehyde. The residue was purified by column chromatography (silica gel, hexane/ethyl acetate 4:1) to afford aldehyde **1i-1** (1.94 g, 8.1 mmol) in 90% yield.

To a stirred solution of diisopropylamine (2 mmol, 2.0 equiv) in THF (5 mL) was added a solution of *n*-butyllithium (1.6 M in hexanes, 1.25 mL, 2 mmol, 2 equiv) slowly at -78 °C. The mixture was stirred at -78 °C for 15 min, warmed to 0 °C, and stirred for another 30 min at this temperature. The mixture was cooled to -78 °C and ethyl propiolate (2 mmol, 2 equiv) was added. After stirring for 30 min at -78 °C, a solution of aldehyde **1i-1** (1 mmol, 1.0 equiv) in THF (5 mL) was added. After stirring at -78 °C for 3 h, the reaction mixture was added to a saturated ammonium chloride solution at 0 °C. The aqueous phase was extracted with Et<sub>2</sub>O, the combined organic layer was washed with brine, dried over MgSO<sub>4</sub> and the solvents were removed under reduced pressure to give an oil.

To a solution of above oil (0.31 g, 0.8 mmol, 1 equiv) in CH<sub>2</sub>Cl<sub>2</sub> (10 mL), was added pyridine (253 mg, 4 equiv), DMAP (one crystal) and pivaloyl chloride (192 mg, 2 equiv) at 0 °C. After stirring for overnight, the mixture was diluted with CH<sub>2</sub>Cl<sub>2</sub> (20 mL) and washed with a 10% copper sulfate aqueous solution, brine, dried over MgSO<sub>4</sub>, and concentrated under reduced pressure. The crude product was purified by flash chromatography on silica gel (hexane/ethyl acetate 4:1) to give **1i** (240 mg, 72% yield over 2 steps) as a yellow oil.

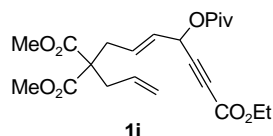

(E)-1-ethyl 7,7-dimethyl 3-(pivaloyloxy)deca-4,9-dien-1-yne-1,7,7-tricarboxylate (**1i**)  
<sup>1</sup>H NMR (400 MHz, CDCl<sub>3</sub>) δ 1.19 (s, 9H), 1.29 (t, *J* = 8.0 Hz, 3H), 2.61 (dd, *J* = 8.0, 12.0 Hz, 4H), 3.70 (s, 6H), 4.21 (q, *J* = 8.0, 2H), 5.07 -5.11 (m, 2H), 5.56-5.61 (m, 2H), 5.80-5.87 (m, 2H); <sup>13</sup>C NMR (100 MHz, CDCl<sub>3</sub>) δ 11.6, 24.7, 33.0, 34.9, 36.5, 50.2, 55.1, 59.9, 60.5, 75.3, 79.9, 117.3, 125.4, 128.6, 129.6, 150.6, 168.5, 174.4. IR (film): ν 2979, 1730, 1200, 1096, 919, 859, 732 cm<sup>-1</sup>. HRMS (ESI) *m/z* calcd. For C<sub>22</sub>H<sub>30</sub>O<sub>8</sub> (M+Na)<sup>+</sup> 445.1832, found 445.1839.

## Procedure for the preparation of ketone substituted substrate **1j**.

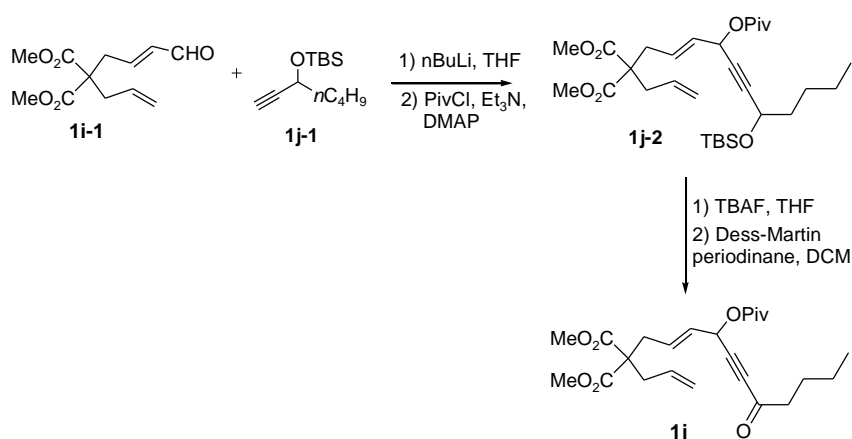

To a stirred solution of terminal alkyne **1j-1** (422.7 mg, 2.5 mmol) in THF (10 mL) was added  $n\text{BuLi}$  (1 mL, 2.5 mmol, 2.5 M in hexane) at  $-78\text{ }^\circ\text{C}$ . The mixture was stirred at  $-78\text{ }^\circ\text{C}$  for 15 min, warmed to  $0\text{ }^\circ\text{C}$ , and stirred for another 20 min at this temperature. The mixture was cooled to  $-78\text{ }^\circ\text{C}$  and a solution of aldehyde **1i-1** (480.5 mg, 2.0 mmol) in THF (5 mL) was added. After stirring for 4h at  $-78\text{ }^\circ\text{C}$ , the reaction mixture was quenched with saturated ammonium chloride and extracted with diethyl ether. The combined organic layer was washed with brine and dried over anhydrous  $\text{Na}_2\text{SO}_4$ . The solvent was evaporated under reduced pressure. The residue was dissolved in DCM (10 mL). To this solution was added pyridine (400.0mg, 5.0 mmol),  $\text{PivCl}$  (301.5 mg, 2.5 mmol) and DMAP (10 mol%) at  $0\text{ }^\circ\text{C}$ . The solution was then warmed to rt. After stirring at rt for 2h, the reaction mixture was diluted with DCM (10 mL), washed with  $\text{H}_2\text{O}$ , brine, dried over anhydrous  $\text{Na}_2\text{SO}_4$ . The solvent was evaporated and the residue was purified by flash column chromatography (silica gel, Hexane/ ethyl acetate = 10:1) to provide product **1j-2** (834.9 mg) in 85% yield.

To a solution of **1j-2** (493.3 g, 1.0 mmol) in THF (2 mL) was added a solution of TBAF (2 mL, 1.0M in THF) at  $0\text{ }^\circ\text{C}$ . After stirring at rt for 60 min, the reaction mixture was diluted with ether (10 mL), washed with  $\text{H}_2\text{O}$ , brine, dried over anhydrous  $\text{Na}_2\text{SO}_4$ . The solvent was removed under reduced pressure. The residue was dissolved in DCM (5 mL). Dess-Martin periodinane (700 mg, 1.6 mmol) was then added at  $0\text{ }^\circ\text{C}$ . After stirring at rt for 30 min, the reaction solution was filtered to remove the solid. The filtrate was washed with saturated aqueous  $\text{Na}_2\text{SO}_3$  and  $\text{NaHCO}_3$  solution,  $\text{H}_2\text{O}$ , brine and dried over anhydrous  $\text{Na}_2\text{SO}_4$ . The solvent was removed and the residue was purified by flash column chromatography (silica gel, hexane/ethyl acetate 4:1) to give desired product **1j** (304 mg) in 81% yield as an oil.

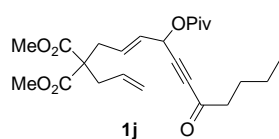

2-Allyl-2-[4-(2,2-dimethyl-propionyloxy)-7-oxo-undec-2-en-5-ynyl]-malonic acid dimethyl ester (**1j**)

$^1\text{H NMR}$  (400 MHz,  $\text{CDCl}_3$ )  $\delta$  0.83 (t,  $J = 7.3\text{ Hz}$ , 3H), 1.13 (s, 9H), 1.21-1.34 (m, 2H),

1.48-1.62 (m, 2H), 2.47 (t,  $J = 7.4$  Hz, 2H), 2.56 (dd,  $J = 13.5, 7.4$  Hz, 4H), 3.63 (s, 6H), 4.98-5.10 (m, 2H), 5.45-5.62 (m, 2H), 5.69-5.87 (m, 2H);  $^{13}\text{C}$  NMR (100 MHz,  $\text{CDCl}_3$ )  $\delta$  13.9, 22.2, 26.1, 27.1, 35.4, 37.4, 38.9, 45.2, 52.6, 57.6, 63.1, 84.6, 86.6, 119.7, 127.9, 130.9, 132.1, 170.9, 176.8, 187.4. IR (film): 2959, 1733, 1680, 1437, 1214, 1134, 930  $\text{cm}^{-1}$ . HRMS (ESI)  $m/z$  calcd. For  $\text{C}_{24}\text{H}_{34}\text{O}_7$  ( $\text{M}+\text{Na}$ ) $^+$  457.2197, found 457.2198.

### Procedure for the preparation of bromide substituted substrate **1k**.

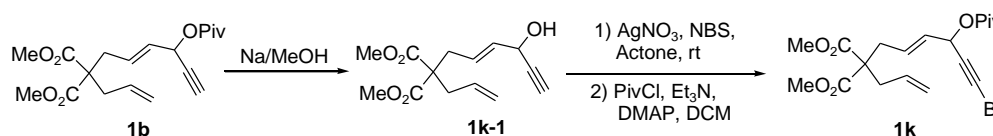

To a reaction tube filled with 6 mL of MeOH was added sodium (144 mg, 6 mmol). The mixture solution was stirred at rt for 10 min. It was then transferred to another tube filled with a solution of compound **1b** (700 mg, 2 mmol) in MeOH (10 mL). The reaction mixture was stirred at rt for 3 h and diluted with ethyl acetate (70 mL). The solution was washed with water, brine, dried over anhydrous  $\text{Na}_2\text{SO}_4$  and concentrated in vacuum. The residue was purified by flash column chromatography (silica gel, hexane/ethyl acetate 2:1) to afford free alcohol **1k-1** (463 mg, 1.74 mmol) in 87% yield. To a solution of **1k-1** (463 mg, 1.74 mmol) in dry acetone (30 ml) was added  $\text{AgNO}_3$  (58.4 mg, 0.35 mmol) and NBS (462 mg, 2.61 mmol) at room temperature. The mixture was stirred at room temperature for 30 min. A saturated aqueous solution of sodium bicarbonate (24 ml) was added and the mixture was extracted with ethyl acetate (2 X 50 mL). The combined organic layers were washed with water, brine, dried over anhydrous  $\text{Na}_2\text{SO}_4$  and concentrated under reduced pressure. The residue was dissolved in  $\text{CH}_2\text{Cl}_2$  (30 mL). To this solution was added triethylamine (527 mg, 5.22 mmol), pivaloyl chloride (271 mg, 2.26 mmol) and DMAP (5 mol %) at room temperature. The resulting mixture was stirred overnight, washed with water, brine, and dried over anhydrous  $\text{Na}_2\text{SO}_4$ . After removing the solvent under reduced pressure, the residue was purified by flash column chromatography (silica gel, hexane/ethyl acetate 20:1) to afford product **1k** (581 mg, 1.36 mmol) in 78% yield for 2 steps.

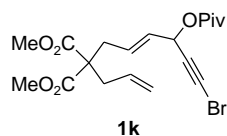

Dimethyl 2-allyl-2-((*E*)-6-bromo-4-(pivaloyloxy)hex-2-en-5-ynyl)malonate (**1k**).

Oil,  $^1\text{H}$  NMR (400 MHz,  $\text{CDCl}_3$ )  $\delta$  1.21 (s, 9H), 2.62-2.66 (m, 4H), 3.72 (s, 6H), 5.09-5.14 (m, 2H), 5.56-5.67 (m, 2H), 5.75-5.83 (m, 2H),  $^{13}\text{C}$  NMR (100 MHz,  $\text{CDCl}_3$ )  $\delta$  27.2, 35.4, 37.4, 39.0, 47.4, 52.7, 57.7, 64.3, 76.3, 119.7, 129.4, 129.8, 132.2, 171.1, 177.1. IR (film): 3454, 2975, 2360, 1730, 1436, 1273, 1211, 1137, 1030, 972  $\text{cm}^{-1}$ . HRMS (ESI)  $m/z$  calcd. For  $\text{C}_{19}\text{H}_{25}\text{BrO}_6$  ( $\text{M}+\text{Na}$ ) $^+$  451.0727, found 451.0714.

### General procedure for the preparation of substrate **1l**.

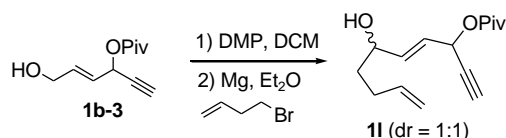

To a solution of alcohol **1b-3** (784 mg, 4.0 mmol) in  $\text{CH}_2\text{Cl}_2$  (50 mL) at 0 °C was added Dess-Martin periodinane (1.65 g, 6.0 mmol). After stirring at rt for 1 h, the reaction solution was filtered to remove the solid. The filtrate was washed with saturated aqueous solution of  $\text{Na}_2\text{SO}_3$  and  $\text{NaHCO}_3$ ,  $\text{H}_2\text{O}$ , brine and dried over anhydrous  $\text{Na}_2\text{SO}_4$ . The solvent was removed under vacuum and the residue was used for the next step without purification.

To a dried two-neck round-bottom flask filled with a solution of magnesium turnings (240 mg, 10 mol) in  $\text{Et}_2\text{O}$  (40 mL) was added 2 mL of a solution of homoallyl bromide (1.61 g, 12 mmol) in  $\text{Et}_2\text{O}$  (8 mL). When the reaction was initiated, the rest of homoallyl bromide solution was slowly added. The reaction mixture was stirred at room temperature for 0.5 h and then heated to reflux for 1 h. Around 30 mL of this Grignard reagent solution was then transferred to the solution of above crude aldehyde in  $\text{Et}_2\text{O}$  (30 mL) at rt. The reaction mixture was stirred for 4 h, quenched with saturated aqueous solution of  $\text{NH}_4\text{Cl}$  and extracted with ethyl acetate (2 X 50 mL). The combined organic layers were washed with water, brine, dried over anhydrous  $\text{Na}_2\text{SO}_4$  and concentrated under reduced pressure. The residue was purified by flash column chromatography (silica gel, hexane/ethyl acetate 4:1) to afford product **11** (750 mg, 3.0 mmol) in 75% yield for 2 steps.

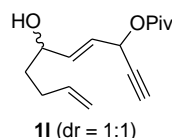

(*E*)-6-hydroxydeca-4,9-dien-1-yn-3-yl pivalate (**11**).

Oil,  $^1\text{H}$  NMR (500 MHz,  $\text{CDCl}_3$ )  $\delta$  1.22 (s, 9H), 1.63-1.69 (m, 3H), 2.17-2.17 (m, 2H), 2.55 (d,  $J = 2.0$  Hz, 1H), 4.22 (m, 1H), 4.98-5.07 (m, 2H), 5.74-5.87 (m, 3H), 6.01-6.06 (m, 1H);  $^{13}\text{C}$  NMR (125 MHz,  $\text{CDCl}_3$ )  $\delta$  27.2, 29.8, 36.2, 39.0, 63.3, (71.4, 71.3 for two isomers), 75.1, 79.8, 115.4, (125.3, 125.4 for two isomers), 137.8, 138.2, 177.3. IR (film): 3411, 3296, 2975, 2935, 1727, 1479, 1460, 1397, 1367, 1273, 1141, 1030, 967  $\text{cm}^{-1}$ . HRMS (ESI)  $m/z$  calcd. For  $\text{C}_{15}\text{H}_{22}\text{O}_3$  ( $\text{M}+\text{Na}$ ) $^+$  273.1461, found 273.1473.

### General procedure for the preparation of enantio-enriched substrates (-)-**1b**, (-)-**1m** and (-)-**1n**:

To a solution of Novozyme 435 from Aldrich (15 mg) in vinyl acetate (2.5 mL) was added a racemic propargylic alcohol (100 mg) at rt. After the solution was stirred for 10 h, it was filtered through a cotton pad. The resulting solution was concentrated under reduced pressure. The residue was purified by flash column chromatography on silica gel to give (*S*)-acetates and (*R*)-alcohols in 40-45% yields. Substrates (-)-**1b**, (-)-**1m** and (-)-**1n** were then prepared by esterification according to known procedures.<sup>2-3</sup>

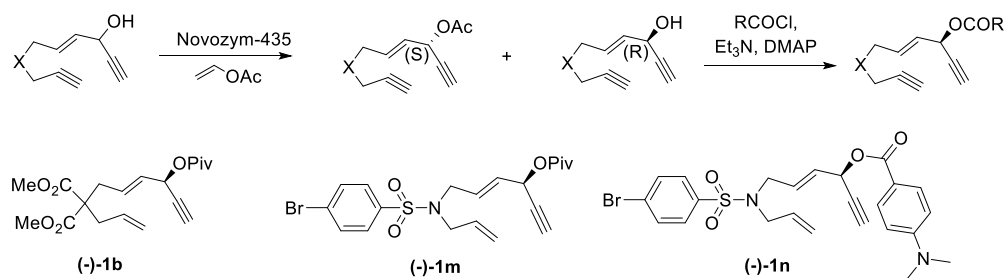

The absolute stereochemistry of the chiral alcohols and esters was determined by comparison to similar propargylic alcohols resolved by the same enzyme.<sup>4</sup> Known chiral alcohol (*R*)-**S1** was also prepared in 96% *ee*.<sup>5</sup> All of its spectroscopic data are identical to literature [ $\alpha$ ]<sub>D</sub> = -8.5 (c 1.00, CHCl<sub>3</sub>), (literature [ $\alpha$ ]<sub>D</sub> = -10.9 (c 1.00, CHCl<sub>3</sub>)).<sup>5</sup>

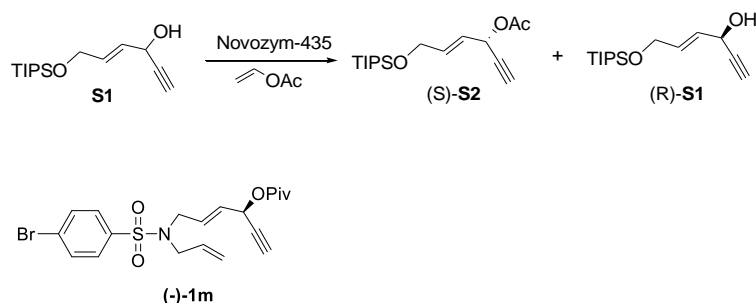

(*R,E*)-2,2-Dimethyl-propionic acid 4-[allyl-(4-bromo-benzenesulfonyl)-amino]-1-ethynyl-but-2-enyl ester (**1m**).

Oil, <sup>1</sup>H NMR (400Mz, CDCl<sub>3</sub>) δ 1.20 (s, 9H), 2.53 (d, *J* = 2.4 Hz, 1H), 3.81 (d, *J* = 6.0 Hz, 2H), 3.87 (d, *J* = 6.4 Hz, 2H), 5.16 (qd, *J* = 1.2, 16.8 Hz, 1H), 5.19 (qd, *J* = 1.2, 10.0 Hz, 1H), 5.61 (tdd, *J* = 6.4, 10.0, 16.8 Hz, 1H), 5.64 (tdd, *J* = 1.2, 5.6, 15.6 Hz, 1H), 5.74 (dtd, *J* = 1.2, 6.4, 15.6 Hz, 1H), 5.80-5.77 (m, 1H), 7.71-7.64 (m, 4H). <sup>13</sup>C NMR (100Mz, CDCl<sub>3</sub>) δ 27.2, 38.9, 47.9, 49.9, 62.8, 75.3, 79.1, 119.9, 127.8, 128.9, 129.0, 129.6, 132.3, 132.7, 139.6, 177.1. IR (film): 3300, 2975, 2930, 1733, 1575, 1478, 1389, 1348, 1267, 1144, 1090, 1067, 1010, 933, 909, 764, 736 cm<sup>-1</sup>. HRMS (ESI) *m/z* calcd. For C<sub>20</sub>H<sub>24</sub>BrNO<sub>4</sub>S (M+Na)<sup>+</sup> 476.0501, found 476.0504.

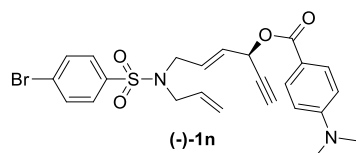

4-Dimethylamino-benzoic acid 4-[allyl-(4-bromo-benzenesulfonyl)-amino]-1-ethynyl-but-2-enyl ester (**1n**).

Oil, <sup>1</sup>H NMR (500 MHz, CDCl<sub>3</sub>) δ 7.90 (d, *J* = 8.6 Hz, 2H), 7.72-7.58 (m, 4H), 6.65 (d, *J* = 9.1 Hz, 2H), 6.03 (dd, *J* = 3.7, 2.1 Hz, 1H), 5.86-5.70 (m, 2H), 5.62 (ddt, *J* = 17.2, 9.8, 6.4 Hz, 1H), 5.22-5.12 (m, 2H), 3.90 (d, *J* = 4.8 Hz, 2H), 3.82 (d, *J* = 6.5 Hz, 2H), 3.05 (s, 6H), 2.56 (d, *J* = 2.2 Hz, 1H). <sup>13</sup>C NMR (100 MHz, CDCl<sub>3</sub>) δ 165.59, 153.85, 139.68, 132.66, 132.37, 131.82, 130.22, 128.92, 128.64, 127.72, 119.88, 115.98, 110.93,



79.62, 75.25, 62.65, 49.84, 47.91, 40.27. IR ( film ): 2917, 2850, 2360, 2341, 1702, 1606, 1575, 1528, 1471, 1445, 1389, 1370, 1340, 1264, 1182, 1163, 1088, 1069, 1009, 944, 907, 827, 767, 727, 670, 669.  $\text{cm}^{-1}$ . HRMS (ESI)  $m/z$  calcd. For  $\text{C}_{24}\text{H}_{25}\text{BrN}_2\text{O}_4\text{S}$   $(\text{M}+\text{H})^+$  517.0792, found 517.0780.

**General procedure for the rhodium-catalyzed [5+2] reaction of ACE with alkene**  
**Method A:**

To a solution of  $[\text{Rh}(\text{coe})_2\text{Cl}]_2$  (5.4 mg, 5 mol %) in 1,2-dichloroethane (1.3 mL) at rt was added tris[3,5-bis(trifluoromethyl)phenyl]phosphine (30 mg, 30 mol %). The reaction solution was stirred at rt for 10 min, substrate **1** (0.15 mmol) was added. The reaction mixture was allowed to stir at 80 °C overnight. The solvent was removed under reduced pressure and the residue was purified by column chromatography on silica gel to afford the corresponding 7-membered ring product.

**Method B:**

To a solution of  $[\text{Rh}(\text{COD})\text{Cl}]_2$  (3.9 mg, 5 mol %) in 1,2-dichloroethane (1.3 mL) at rt was added tris[3,5-bis(trifluoromethyl)phenyl]phosphine (30 mg, 30 mol %). The reaction solution was stirred at rt for 10 min, substrate **1** (0.15 mmol) was added. The reaction mixture was allowed to stir at 80 °C overnight. The solvent was removed under reduced pressure and the residue was purified by column chromatography on silica gel to afford the corresponding 7-membered ring product.

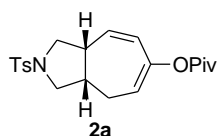

(5*E*,7*Z*)-1,2,3,3*a*,4,8*a*-hexahydro-2-tosylcyclohepta[*c*]pyrrol-6-yl pivalate (**2a**).

Oil, 47.8 mg, 82% yield.  $^1\text{H}$  NMR (400 MHz,  $\text{CDCl}_3$ )  $\delta$  1.22 (s, 9H), 1.76-1.83 (m, 1H), 1.97 (ddd,  $J = 2.8, 8.8, 14.8$  Hz, 1H), 2.44 (s, 3H), 2.48-2.56 (m, 1H), 2.87-2.95 (m, 1H), 3.03 (dd,  $J = 8.8, 9.6$  Hz, 1H), 3.11 (dd,  $J = 4.0, 10.0$  Hz, 1H), 3.54 (dd,  $J = 7.2, 10.0$  Hz, 1H), 3.60 (dd,  $J = 7.2, 9.6$  Hz, 1H), 5.57-5.61 (m, 2H), 5.74 (dd,  $J = 4.4, 12.4$  Hz, 1H), 7.33 (dd,  $J = 0.4, 8.4$  Hz, 2H), 7.72 (d,  $J = 8.0$  Hz, 2H);  $^{13}\text{C}$  NMR (100 MHz,  $\text{CDCl}_3$ )  $\delta$  21.8, 27.2, 27.6, 38.9, 43.8, 44.4, 53.2, 54.8, 119.2, 125.4, 127.8, 129.9, 133.0, 133.7, 143.8, 147.1, 177.6. IR ( film ): 2973, 2935, 2875, 2360, 2341, 1739, 1700, 1341, 1232, 1158, 901  $\text{cm}^{-1}$ . HRMS (ESI)  $m/z$  calcd. For  $\text{C}_{21}\text{H}_{27}\text{NO}_4\text{S}$   $(\text{M}+\text{Na})^+$  412.1553, found 412.1545.

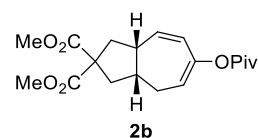

(4*Z*,6*E*)-dimethyl 3,3*a*,8,8*a*-tetrahydro-6-(pivaloyloxy)azulene-2,2(1*H*)-dicarboxylate (**2b**).

Oil, 43.2 mg, 82% yield.  $^1\text{H}$  NMR (400 MHz,  $\text{CDCl}_3$ )  $\delta$  1.24 (s, 9H), 1.96-2.03 (m, 1H), 2.10-2.17 (m, 3H), 2.55-2.61 (m, 3H), 2.85-2.91 (m, 1H), 3.72 (s, 3H), 3.73 (s, 3H), 5.58-5.66 (m, 2H), 5.93 (dd,  $J = 4.0, 12.0$  Hz, 1H);  $^{13}\text{C}$  NMR (100 MHz,  $\text{CDCl}_3$ )  $\delta$  27.3, 29.3, 38.9, 41.5, 41.6, 44.1, 46.0, 52.98, 53.02, 57.8, 119.3, 123.8, 136.9, 147.3, 172.7, 172.9, 177.6. IR (film): 3450, 2955, 2360, 1731, 1434, 1271, 1199, 1126, 1064, 905  $\text{cm}^{-1}$ . HRMS (ESI)  $m/z$  calcd. For  $\text{C}_{19}\text{H}_{26}\text{O}_6$  ( $\text{M}+\text{Na}$ ) $^+$  373.1622, found 373.1614.

Hydrogenation of product **2b** led to the formation of two diastereomers (**2b-S**). This indicated that **2b** had cis-stereochemistry as discussed in the manuscript (**2b-S** = the 1:1 mixture of **2b-H4a** and **2b-H4b** in the manuscript).

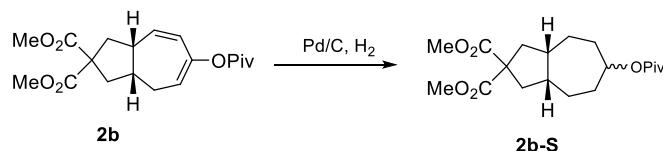

Dimethyl octahydro-6-(pivaloyloxy)azulene-2,2(1H)-dicarboxylate (**2b-S**).

$^1\text{H}$  NMR (one isomer, 400 MHz,  $\text{CDCl}_3$ )  $\delta$  1.21 (s, 9H), 1.31-1.49 (m, 4H), 1.64-1.79 (m, 4H), 1.97-2.03 (m, 2H), 2.20-2.27 (m, 2H), 2.49-2.54 (m, 2H), 3.71 (s, 3H), 3.74 (s, 3H), 5.06-5.09 (m, 1H);  $^1\text{H}$  NMR (the other isomer, 400 MHz,  $\text{CDCl}_3$ )  $\delta$  1.16 (s, 9H), 1.31-1.49 (m, 4H), 1.64-1.79 (m, 4H), 1.97-2.03 (m, 2H), 2.20-2.27 (m, 2H), 2.49-2.54 (m, 2H), 3.70 (s, 3H), 3.74 (s, 3H), 4.60-4.67 (m, 1H);  $^{13}\text{C}$  NMR (100 MHz,  $\text{CDCl}_3$ )  $\delta$  25.3, 26.8, 27.3, 27.4, 27.5, 33.2, 34.3, 38.8, 39.2, 41.2, 41.7, 42.3, 52.8, 52.9, 59.8, 60.6, 71.5, 75.8, 172.55, 172.61, 172.7, 172.7, 177.96, 178.02. IR (film): 2954, 2935, 2256, 1726, 1435, 1283, 1252, 1163, 1031, 1001, 909  $\text{cm}^{-1}$ . HRMS (ESI)  $m/z$  calcd. For  $\text{C}_{19}\text{H}_{30}\text{O}_6$  ( $\text{M}+\text{Na}$ ) $^+$  377.1935, found 377.1942.

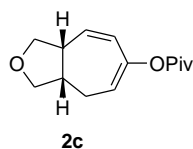

(4Z,6E)-3,3a,8,8a-tetrahydro-1H-cyclohepta[c]furan-6-yl pivalate (**2c**).

Oil, 21.9 mg, 61.5% yield.  $^1\text{H}$  NMR (400 MHz,  $\text{CDCl}_3$ )  $\delta$  1.26 (s, 9H), 2.04-2.20 (m, 2H), 2.62-2.69 (m, 1H), 2.99-3.07 (m, 1H), 3.54 (dd,  $J = 8.4, 9.2$  Hz, 1H), 3.61 (dd,  $J = 4.8, 8.8$  Hz, 1H), 4.05-4.13 (m, 2H), 5.68-5.75 (m, 2H), 5.94 (dd,  $J = 4.0, 12.0$  Hz, 1H);  $^{13}\text{C}$  NMR (100 MHz,  $\text{CDCl}_3$ )  $\delta$  27.3, 27.8, 39.0, 44.8, 46.3, 73.5, 75.4, 119.4, 124.7, 133.7, 147.5, 177.7. IR (film): 2972, 2934, 2870, 1742, 1479, 1396, 1278, 1128, 905  $\text{cm}^{-1}$ . HRMS (ESI)  $m/z$  calcd. For  $\text{C}_{14}\text{H}_{20}\text{O}_3$  ( $\text{M}+\text{Na}$ ) $^+$  259.1305, found 259.1297.

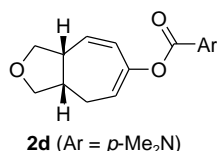

(4Z,6E)-3,3a,8,8a-tetrahydro-1H-cyclohepta[c]furan-6-yl 4-(dimethylamino)benzoate (**2d**).

Solid, mp: 140-141  $^{\circ}\text{C}$ . 30.1 mg, 67% yield.  $^1\text{H}$  NMR (500 MHz,  $\text{CDCl}_3$ )  $\delta$  2.11-2.23 (m, 2H), 2.67-2.74 (m, 1H), 3.02-3.15 (m, 1H), 3.05 (s, 6 H), 3.58 (dd,  $J = 8.5, 8.5$  Hz,

1H), 3.64 (dd,  $J = 4.5, 8.5$  Hz, 1H), 4.08-4.14 (m, 2H), 5.85-5.87 (m, 1H), 5.86-5.88 (m, 1H), 5.96 (dd,  $J = 4.0, 12.0$  Hz, 1H), 6.66 (d,  $J = 9.0$  Hz, 2H), 7.94 (d,  $J = 9.0$  Hz, 2H);  $^{13}\text{C}$  NMR (125 MHz,  $\text{CDCl}_3$ )  $\delta$  28.0, 40.3, 44.9, 46.4, 73.7, 75.6, 111.0, 116.4, 119.7, 125.5, 132.0, 133.3, 147.8, 153.9, 166.1. IR (film): 2927, 2859, 1704, 1598, 1530, 1371, 1274, 1181, 1116, 1058, 908  $\text{cm}^{-1}$ . HRMS (ESI)  $m/z$  calcd. For  $\text{C}_{18}\text{H}_{21}\text{NO}_3$  ( $\text{M}+\text{Na}$ ) $^+$  322.1414, found 322.1409.

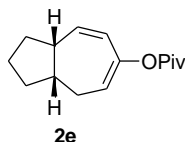

(5*E*,7*Z*)-1,2,3,3*a*,4,8*a*-hexahydroazulen-6-yl pivalate (**2e**).

Oil, 19.0 mg, 54% yield.  $^1\text{H}$  NMR (400 MHz,  $\text{CDCl}_3$ )  $\delta$  1.25 (s, 9H), 1.39-1.50 (m, 3H), 1.59-1.64 (m, 1H), 1.88-2.00 (m, 3H), 2.07 (ddd,  $J = 2.8, 8.8, 14.4$  Hz, 1H), 2.35-2.44 (m, 1H), 2.63-2.67 (m, 1H), 5.55 (td,  $J = 2.0, 12.0$  Hz, 1H), 5.62 – 5.66 (m, 1H), 6.00 (dd,  $J = 4.0, 12.0$  Hz, 1H);  $^{13}\text{C}$  NMR (100 MHz,  $\text{CDCl}_3$ )  $\delta$  22.6, 27.3, 30.0, 34.0, 34.1, 39.0, 45.6, 46.3, 119.6, 122.5, 139.4, 147.3, 177.8. IR (film): 2955, 2870, 2360, 2340, 2255, 1742, 1478, 1395, 1279, 907  $\text{cm}^{-1}$ . HRMS (ESI)  $m/z$  calcd. For  $\text{C}_{15}\text{H}_{22}\text{O}_2$  ( $\text{M}+\text{Na}$ ) $^+$  257.1512, found 257.1507.

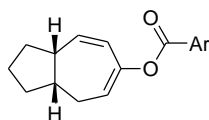

(5*E*,7*Z*)-1,2,3,3*a*,4,8*a*-hexahydroazulen-6-yl 4-(dimethylamino)benzoate (**2f**).

Solid, mp: 97-98 °C, 27.2 mg, 61% yield.  $^1\text{H}$  NMR (500 MHz,  $\text{CDCl}_3$ )  $\delta$  7.95 (d,  $J = 9.0$  Hz, 2H), 6.65 (d,  $J = 9.0$  Hz, 2H), 6.03 (dd,  $J = 4.0, 12.0$  Hz, 1H), 5.71-5.79 (m, 2H), 3.05 (s, 6H), 2.68-2.71 (m, 1H), 2.42-2.49 (m, 1H), 2.11 (ddd,  $J = 2.5, 8.5, 14.0$  Hz, 1H), 1.93-2.03 (m, 3H), 1.60-1.66 (m, 1H), 1.39-1.53 (m, 3H);  $^{13}\text{C}$  NMR (125 MHz,  $\text{CDCl}_3$ )  $\delta$  22.7, 30.2, 34.1, 34.2, 40.3, 45.6, 46.5, 110.9, 116.8, 119.9, 123.2, 131.9, 139.0, 147.6, 153.7, 166.1. IR (film): 3429, 2948, 1705, 1605, 1528, 1369, 1277, 1182, 1120, 905  $\text{cm}^{-1}$ . HRMS (ESI)  $m/z$  calcd. For  $\text{C}_{19}\text{H}_{23}\text{NO}_2$  ( $\text{M}+\text{Na}$ ) $^+$  320.1621, found 320.1613.

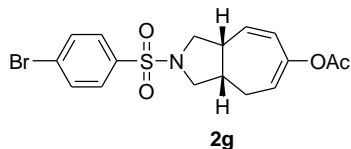

Acetic acid 2-(4-bromo-benzenesulfonyl)-1,2,3,3*a*,4,8*a*-hexahydrocyclohepta[*c*]pyrrol-6-yl ester (**2g**).

Solid, m.p. = 129-132 °C. 25.9 mg, 84% yield.  $^1\text{H}$  NMR (400Mz,  $\text{CDCl}_3$ )  $\delta$  1.85 (ddd,  $J = 5.2, 10.4, 15.2$  Hz, 1H), 2.03 (ddd,  $J = 2.8, 8.7, 15.5$  Hz, 1H), 2.12 (s, 3H), 2.60-2.53 (m, 1H), 2.97-2.91 (m, 1H), 3.05 (t,  $J = 9.2$  Hz, 1H), 3.13 (dd,  $J = 4.4, 10.0$  Hz, 1H), 3.54 (dd,  $J = 7.0, 10.2$  Hz, 1H), 3.60 (dd,  $J = 7.4, 9.8$  Hz, 1H), 5.66-5.61 (m, 2H), 5.73

(dd,  $J=4.2, 12.2$  Hz, 1H), 7.71-7.66 (m, 4H);  $^{13}\text{C}$  NMR (100MHz,  $\text{CDCl}_3$ )  $\delta$  21.2, 27.5, 44.0, 44.2, 53.3, 54.7, 119.4, 125.6, 128.1, 129.3, 132.7, 132.9, 136.0, 146.9, 169.9. IR (film): 3058, 2975, 1740, 1575, 1479, 1389  $\text{cm}^{-1}$ . HRMS (ESI)  $m/z$  calcd. For  $\text{C}_{17}\text{H}_{18}\text{BrNO}_4\text{S}$  ( $\text{M}+\text{Na}$ ) $^+$  434.0032, found 434.0022.

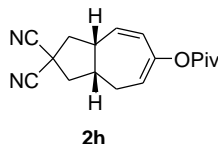

(5*E*,7*Z*)-2,2-dicyano-1,2,3,3*a*,4,8*a*-hexahydroazulen-6-yl pivalate (**2h**).

Oil, 35.4 mg, 83% yield.  $^1\text{H}$  NMR (400 MHz,  $\text{CDCl}_3$ )  $\delta$  1.25 (s, 9H), 1.99-2.07 (m, 1H), 2.26-2.39 (m, 3H), 2.70-2.79 (m, 2H), 2.91-3.01 (m, 1H), 3.13-3.20 (m, 1H), 5.70-5.77 (m, 2H), 6.01 (dd,  $J = 4.8, 12.0$  Hz, 1H);  $^{13}\text{C}$  NMR (100 MHz,  $\text{CDCl}_3$ )  $\delta$  27.3, 28.4, 31.9, 39.0, 42.2, 44.5, 45.2, 48.1, 116.2, 116.6, 118.6, 126.5, 135.1, 147.9, 177.6. IR (film): 2976, 1740, 1660, 1479, 1279, 1126, 905  $\text{cm}^{-1}$ . HRMS (ESI)  $m/z$  calcd. For  $\text{C}_{17}\text{H}_{20}\text{N}_2\text{O}_2$  ( $\text{M}+\text{Na}$ ) $^+$  307.1417, found 307.1405.

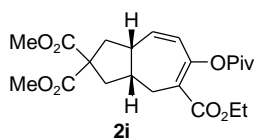

4-methyl-2-tosyl-1,2,3,3*a*-tetrahydrocyclohepta[*c*]pyrrol-6-yl pivalate (**2i**)

Oil, 31.0 mg, 76% yield.  $^1\text{H}$  NMR (500 MHz,  $\text{CDCl}_3$ )  $\delta$  1.23-1.30 (m, 3H), 1.28 (s, 9H), 1.99-2.07 (m, 2H), 2.11-2.16 (m, 1H), 2.58-2.66 (m, 2H), 2.73-2.77 (m, 2H), 2.91 (d,  $J = 4.0$  Hz, 1H), 3.73 (s, 6H), 4.17-4.21 (m, 2H), 5.79 (d,  $J = 8.0$ , 1H), 6.20 (d,  $J = 8.0$  Hz, 1H);  $^{13}\text{C}$  NMR (100 MHz,  $\text{CDCl}_3$ )  $\delta$  12.1, 24.8, 29.3, 36.6, 38.9, 39.1, 40.1, 47.4, 50.5, 56.3, 58.5, 120.2, 122.4, 140.5, 149.1, 163.6, 169.9, 170.0, 173.9. IR (film):  $\nu$  2980, 1731, 1274, 1253, 1124, 1026, 735  $\text{cm}^{-1}$ . HRMS (ESI)  $m/z$  calcd. For  $\text{C}_{22}\text{H}_{30}\text{O}_8$  ( $\text{M}+\text{Na}$ ) $^+$  445.1832, found 445.1835.

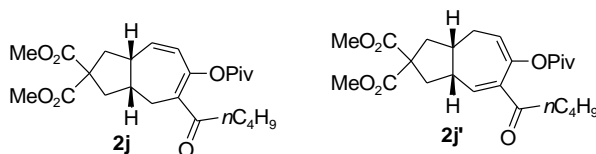

6-(2,2-Dimethyl-propionyloxy)-5-pentanoyl-3,3*a*,4,8*a*-tetrahydro-1*H*-azulene-2,2-dicarboxylic acid dimethyl ester (**2j**). The ratio of **2j** : **2j'** is about 3:1.

Oil. 63.4 mg, 73% yield.  $^1\text{H}$  NMR (400 MHz,  $\text{CDCl}_3$ )  $\delta$  0.91 (t,  $J = 7.3$  Hz, 3H), 1.25-1.40 (m, 10H), 1.50-1.75 (m, 3H), 1.91 (t,  $J = 13.1$  Hz, 1H), 2.03 (dd,  $J = 13.4, 8.5$  Hz, 1H), 2.14 (dd,  $J = 13.3, 9.7$  Hz, 1H), 2.52-2.77 (m, 6H), 2.85-2.98 (m, 1H), 3.73 (s, 3H), 3.73 (s, 3H), 5.67 (dd,  $J = 11.7, 2.2$  Hz, 1H), 6.20 (dd,  $J = 11.8, 3.7$  Hz, 1H);  $^{13}\text{C}$  NMR (100 MHz,  $\text{CDCl}_3$ )  $\delta$  14.2, 22.6, 26.5, 27.2, 31.1, 39.2, 41.3, 41.5, 42.5, 43.0, 50.0, 52.99, 53.04, 58.8, 122.7, 124.8, 130.6, 142.8, 172.4, 176.6, 201.3. IR (film): 2958, 1731, 1435, 1269, 1201, 1110  $\text{cm}^{-1}$ . HRMS (ESI)  $m/z$  calcd. For  $\text{C}_{24}\text{H}_{34}\text{O}_7$  ( $\text{M}+\text{Na}$ ) $^+$

457.2197, found 457.2198.

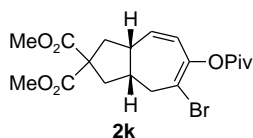

(4Z,6Z)-dimethyl 7-bromo-3,3a,8,8a-tetrahydro-6-(pivaloyloxy)azulene-2,2(1H)-dicarboxylate (**2k**).

Oil, 34.0 mg, 53% yield.  $^1\text{H}$  NMR (400 MHz,  $\text{CDCl}_3$ )  $\delta$  1.29 (s, 9H), 2.10 (td,  $J = 8.4, 13.6$  Hz, 2H), 2.59-2.67 (m, 4H), 2.76-2.84 (m, 1H), 2.82-2.95 (m, 1H), 3.73 (s, 3H), 3.74 (s, 3H), 5.65 (dd,  $J = 2.4, 12.0$  Hz, 1H), 6.01 (dd,  $J = 3.6, 12.0$  Hz, 1H);  $^{13}\text{C}$  NMR (100 MHz,  $\text{CDCl}_3$ )  $\delta$  27.3, 39.2, 41.1, 41.2, 41.3, 42.8, 47.4, 53.09, 53.13, 58.2, 114.7, 123.2, 137.9, 143.9, 172.4, 172.5, 176.0. IR (film): 2974, 1730, 1434, 1272, 1201, 1121, 1028, 912  $\text{cm}^{-1}$ . HRMS (ESI)  $m/z$  calcd. For  $\text{C}_{19}\text{H}_{25}\text{BrO}_6$  ( $\text{M}+\text{Na}$ ) $^+$  451.0727, found 451.0719.

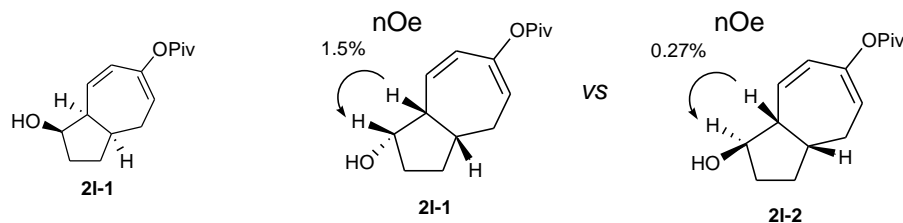

(*trans,cis*)-2,2-Dimethyl-propionic acid 1-hydroxy-1,2,3,3a,4,8a-hexahydro-azulen-6-yl ester (**2l-1**)

$^1\text{H}$  NMR (400 MHz,  $\text{CDCl}_3$ )  $\delta$  1.25 (s, 9H), 1.59-1.70 (m, 1H), 1.72-1.82 (m, 2H), 1.90-1.98 (m, 2H), 2.20-2.24 (m, 2H), 2.51-2.60 (m, 1H), 2.77-2.83 (m, 1H), 4.30-4.32 (m, 1H), 5.65-5.69 (m, 1H), 5.81 (td,  $J = 2.0, 12.0$  Hz, 1H), 6.11 (dd,  $J = 5.0, 12.0$  Hz, 1H);  $^{13}\text{C}$  NMR (125 MHz,  $\text{CDCl}_3$ )  $\delta$  27.3, 31.0, 31.4, 33.2, 39.0, 46.7, 51.1, 76.9, 119.9, 127.2, 134.0, 147.0, 178.0. IR (film): 3416, 2958, 1729, 1479, 1396, 1280, 1131, 1047, 908  $\text{cm}^{-1}$ . HRMS (ESI)  $m/z$  calcd. For  $\text{C}_{15}\text{H}_{22}\text{O}_3$  ( $\text{M}+\text{Na}$ ) $^+$  273.1461, found 273.1448.

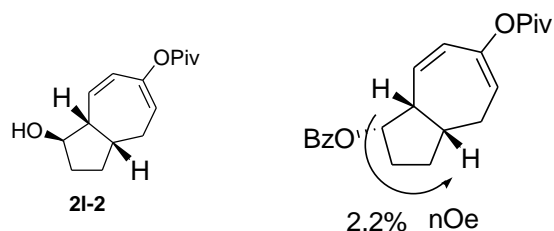

(*cis,cis*)-2,2-Dimethyl-propionic acid 1-hydroxy-1,2,3,3a,4,8a-hexahydro-azulen-6-yl ester (**2l-2**)

$^1\text{H}$  NMR (400 MHz,  $\text{CDCl}_3$ )  $\delta$  1.25 (s, 9H), 1.39-1.51 (m, 2H), 1.67 (s, 1H), 1.89-2.05 (m, 3H), 2.14 (ddd,  $J = 2.8, 8.0, 14.4$ , 1H), 2.51-2.55 (m, 1H), 2.64-2.70 (m, 1H), 4.01-4.07 (m, 1H), 5.63-5.68 (m, 2H), 6.13 (dd,  $J = 4.4, 12.0$  Hz, 1H);  $^{13}\text{C}$  NMR (100 MHz,  $\text{CDCl}_3$ )  $\delta$  27.3, 29.7, 30.6, 32.7, 39.0, 45.8, 53.1, 79.8, 119.4, 124.1, 136.7, 147.5, 177.8. IR (film): 3371, 2958, 2933, 1731, 1281, 1138, 906  $\text{cm}^{-1}$ . HRMS (ESI)  $m/z$  calcd. For

C<sub>15</sub>H<sub>22</sub>O<sub>3</sub> (M+Na)<sup>+</sup> 273.1461, found 273.1467.

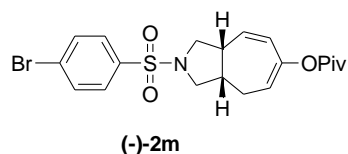

(*R*)-2,2-Dimethyl-propionic acid 2-(4-bromo-benzenesulfonyl)-1,2,3,3a,4,8a-hexahydro- cyclohepta[c]pyrrol-6-yl ester (**2m**).

Solid, m.p. = 126-130 °C. 36 mg, 85% yield, <sup>1</sup>H NMR (400MHz, CDCl<sub>3</sub>) δ 1.22 (s, 9H), 1.85 (ddd, *J* = 5.2, 10.4, 15.2 Hz, 1H), 2.03 (ddd, *J* = 2.6, 8.4, 14.8 Hz, 1H), 2.61-2.53 (m, 1H), 2.97-2.90 (m, 1H), 3.05 (t, *J* = 9.0 Hz, 1H), 3.11 (dd, *J* = 4.8, 10.0 Hz, 1H), 3.52 (dd, *J* = 7.2, 10.0 Hz, 1H), 3.58 (dd, *J* = 7.8, 9.4 Hz, 1H), 5.58-5.55 (m, 2H), 5.70 (dd, *J* = 4.2, 12.2 Hz, 1H), 7.70-7.65 (m, 4H); <sup>13</sup>C NMR (100MHz, CDCl<sub>3</sub>) δ 27.2, 27.3, 38.9, 43.8, 44.5, 53.2, 54.4, 119.0, 125.6, 128.0, 129.2, 132.6, 132.9, 135.9, 147.1, 177.6. IR (film): 3058, 2975, 1740, 1575, 1479, 1389 cm<sup>-1</sup>. HRMS (ESI) *m/z* calcd. For C<sub>20</sub>H<sub>24</sub>BrNO<sub>4</sub>S (M+Na)<sup>+</sup> 476.0501, found 476.0495.

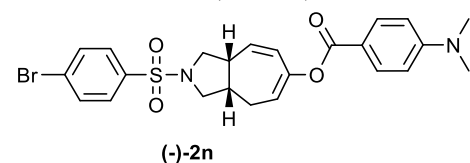

4-Dimethylamino-benzoic acid 2-(4-bromo-benzenesulfonyl)-1,2,3,3a,4,8a-hexahydro-cyclohepta[c]pyrrol-6-yl ester (**2n**).

Solid, m.p. = 199-202 °C. 24.3 mg, 72% yield, <sup>1</sup>H NMR (500 MHz, CDCl<sub>3</sub>) δ 7.91 (d, *J* = 9.0 Hz, 2H), 7.74-7.65 (m, 4H), 6.65 (d, *J* = 9.0 Hz, 2H), 5.81-5.69 (m, 3H), 3.62 (dd, *J* = 9.6, 7.4 Hz, 1H), 3.56 (dd, *J* = 10.1, 6.9 Hz, 1H), 3.19-3.04 (m, 8H), 3.04-2.95 (m, 1H), 2.68-2.58 (m, 1H), 2.06 (ddd, *J* = 15.0, 8.6, 2.8 Hz, 1H), 1.90 (ddd, *J* = 15.4, 10.7, 5.4 Hz, 1H). <sup>13</sup>C NMR (125 MHz, CDCl<sub>3</sub>) δ 165.98, 153.91, 147.43, 136.00, 132.67, 132.56, 132.02, 129.28, 128.06, 126.39, 119.27, 116.14, 110.99, 54.71, 53.37, 44.85, 43.91, 40.32, 27.61. IR ( film ): 2926, 2855, 2360, 1696, 1603, 1528, 1373, 1342, 1278, 1181, 1121, 1069, 1109, 907, 829, 764, 729 cm<sup>-1</sup>. HRMS (ESI) *m/z* calcd. For C<sub>24</sub>H<sub>25</sub>BrN<sub>2</sub>O<sub>4</sub>S (M+NH<sub>4</sub>)<sup>+</sup> 534.1057, found 534.1052.

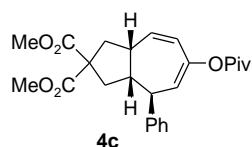

(4*Z*,6*E*)-dimethyl-3,3a,8,8a-tetrahydro-8-phenyl-6-(pivaloyloxy)azulene-2,2(1*H*)-dicarboxylate (**4c**).

Oil, 33.2 mg, 52% yield. <sup>1</sup>H NMR (400 MHz, CDCl<sub>3</sub>) δ 1.23 (s, 9H), 1.95 (dd, *J* = 9.6, 13.6 Hz, 1H), 2.18 (dd, *J* = 6.4, 13.6 Hz, 1H), 2.34 (dd, *J* = 6.4, 13.6 Hz, 1H), 2.55 (dd, *J* = 7.2, 13.6 Hz, 1H), 2.93-2.99 (m, 2H), 3.21 (dd, *J* = 6.4, 10.0 Hz, 1H), 3.68 (s, 6H), 5.72-5.75 (m, 2H), 6.02 (dd, *J* = 2.8, 12.0 Hz, 1H), 7.22-7.32 (m, 5H); <sup>13</sup>C NMR (100 MHz, CDCl<sub>3</sub>) δ 27.3, 39.0, 39.6, 41.3, 42.1, 46.9, 52.95, 53.00, 57.4, 58.5, 124.4, 124.7,

126.8, 128.3, 128.9, 139.4, 144.0, 146.2, 172.6, 172.7, 177.7. IR ( film ): 3385, 2955, 1731, 1479, 1434, 1254, 1199, 1123, 909  $\text{cm}^{-1}$ . HRMS (ESI)  $m/z$  calcd. For  $\text{C}_{25}\text{H}_{30}\text{O}_6$  ( $\text{M}+\text{Na}$ ) $^+$  449.1935, found 449.1915.

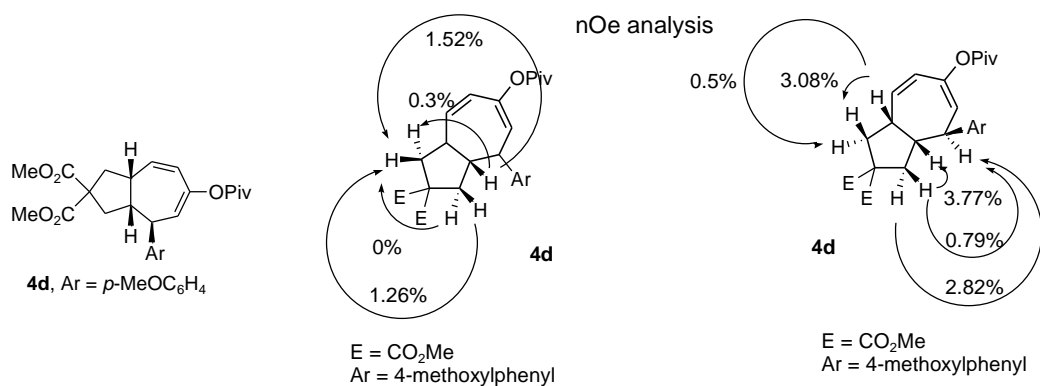

(4*Z*,6*E*)-dimethyl-3,3a,8,8a-tetrahydro-8-(4-methoxyphenyl)-6-(pivaloyloxy)azulene-2,2(1*H*)-dicarboxylate (**4d**).

Oil, 34.9 mg, 51% yield. <sup>1</sup>H NMR (400 MHz, CDCl<sub>3</sub>)  $\delta$  1.23 (s, 9H), 1.95 (dd,  $J$  = 10.0, 13.6 Hz, 1H), 2.18 (dd,  $J$  = 6.8, 13.6 Hz, 1H), 2.34 (dd,  $J$  = 6.8, 13.6 Hz, 1H), 2.53 (dd,  $J$  = 7.2, 13.6 Hz, 1H), 2.86-2.96 (m, 2H), 3.17 (dd,  $J$  = 6.0, 9.6 Hz, 1H), 3.68 (s, 3H), 3.69 (s, 3H), 3.79 (s, 3H), 5.70-5.72 (m, 2H), 6.00 (dd,  $J$  = 3.2, 12.0 Hz, 1H), 6.84 (d,  $J$  = 8.8 Hz, 2H), 7.14 (d,  $J$  = 8.8 Hz, 2H); <sup>13</sup>C NMR (100 MHz, CDCl<sub>3</sub>)  $\delta$  27.3, 39.6, 41.3, 42.1, 46.0, 52.96, 53.01, 55.5, 57.3, 58.5, 114.3, 124.4, 124.9, 129.2, 136.1, 139.3, 146.0, 158.5, 172.7, 172.8, 177.7. IR ( film ): 2955, 2358, 1731, 1511, 1435, 1248, 1198, 1124, 1065, 1034, 906  $\text{cm}^{-1}$ . HRMS (ESI)  $m/z$  calcd. For  $\text{C}_{26}\text{H}_{32}\text{O}_7$  ( $\text{M}+\text{Na}$ ) $^+$  479.2040, found 479.2040.

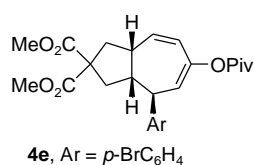

(4*Z*,6*E*)-dimethyl-8-(4-bromophenyl)-3,3a,8,8a-tetrahydro-6-(pivaloyloxy)azulene-2,2(1*H*)-dicarboxylate (**4e**).

Oil, 40.8 mg, 54% yield. <sup>1</sup>H NMR (500 MHz, CDCl<sub>3</sub>)  $\delta$  1.23 (s, 9H), 1.93 (dd,  $J$  = 10.0, 13.5 Hz, 1H), 2.16 (dd,  $J$  = 7.0, 13.5 Hz, 1H), 2.33 (dd,  $J$  = 6.5, 13.5 Hz, 1H), 2.54 (dd,  $J$  = 7.5, 13.5 Hz, 1H), 2.86-2.98 (m, 2H), 3.19 (dd,  $J$  = 6.0, 10.0 Hz, 1H), 3.69 (s, 6H), 5.67 (dd,  $J$  = 1.0, 6.0 Hz, 1H), 5.72 (d,  $J$  = 12.0 Hz, 1H), 6.00 (dd,  $J$  = 3.0, 11.5 Hz, 1H), 7.11 (d,  $J$  = 8.5 Hz, 2H), 7.43 (d,  $J$  = 8.5 Hz, 2H); <sup>13</sup>C NMR (125 MHz, CDCl<sub>3</sub>)  $\delta$  27.3, 39.0, 39.5, 41.2, 42.1, 46.3, 53.0, 53.1, 57.2, 58.4, 120.7, 123.9, 124.4, 130.0, 132.0, 139.5, 142.9, 146.5, 172.5, 172.7, 177.7. IR ( film ): 2973, 1731, 1486, 1434, 1272, 1199, 1123, 1071  $\text{cm}^{-1}$ . HRMS (ESI)  $m/z$  calcd. For  $\text{C}_{25}\text{H}_{29}\text{BrO}_6$  ( $\text{M}+\text{Na}$ ) $^+$  527.1040, found 527.1038.

## Procedures for the synthesis of compounds **5**, **6**, and **7**

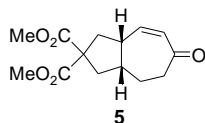

6-Oxo-3,3a,4,5,6,8a-hexahydro-1H-azulene-2,2-dicarboxylic acid dimethyl ester (**5**). To a solution of diene **2b** (35.0 mg, 0.1 mmol) in DCM (1 mL) was added TFA (0.5 mL) and MeOH (4 mg, 0.13 mmol). The reaction was stirred for 3-4 h at room temperature before the addition of saturated aqueous NaHCO<sub>3</sub>. The mixture was extracted with EtOAc four times. The combined organic extracts were washed with brine, dried with Na<sub>2</sub>SO<sub>4</sub> and concentrated under vacuum. Purification by flash column chromatography on silica gel (1:3 EtOAc/Hexane) gave compound **5** (22.0 mg, 83% yield) as a colorless oil.

<sup>1</sup>H NMR (400 MHz, CDCl<sub>3</sub>) δ 1.63 – 1.71 (m, 1H), 1.86 – 2.00 (m, 2H), 2.31 (dd, *J* = 13.7, 7.9 Hz, 1H), 2.39 – 2.55 (m, 2H), 2.56 – 2.73 (m, 3H), 3.05 – 3.17 (m, 1H), 3.74 (s, 3H), 3.75 (s, 3H), 5.92 (dt, *J* = 12.3, 2.0 Hz, 1H), 6.30 (dd, *J* = 12.3, 4.1 Hz, 1H); <sup>13</sup>C NMR (100 MHz, CDCl<sub>3</sub>) δ 25.8, 40.9, 41.7, 42.3, 42.4, 43.0, 53.1, 53.2, 59.2, 131.0, 146.7, 172.4, 172.7, 204.3. IR (film): 2955, 1728, 1664, 1434, 1253, 1201, 1172, 1069, 939 cm<sup>-1</sup>. HRMS (ESI) *m/z* calcd. For C<sub>14</sub>H<sub>18</sub>O<sub>5</sub> (M+Na)<sup>+</sup> 289.1046, found 289.1046.

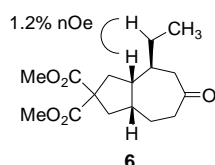

4-Ethyl-6-oxo-octahydro-azulene-2,2-dicarboxylic acid dimethyl ester (**6**).

To a solution of triethyl phosphite (1 mg, 0.006 mmol) in toluene (1.0 mL) was added Cu(OTf)<sub>2</sub> (1.1 mg, 0.003 mmol) under nitrogen atmosphere. After the reaction mixture was stirred for 30 min at rt, Et<sub>2</sub>Zn (1.0 M, 0.3 mL, 0.3 mmol) was added slowly under -20 °C, the resulting mixture was stirred for 15 min. Enone **5** (26.6 mg, 0.1 mmol) was added. The reaction was stirred for 3-4 h at rt before the addition of saturated aqueous NaHCO<sub>3</sub>. The solution was extracted with EtOAc for four times. The combined organic extracts were washed with brine, dried with Na<sub>2</sub>SO<sub>4</sub> and concentrated under vacuum. Purification by flash column chromatography on silica gel (1:3 EtOAc/Hexane) gave compound **6** (24.2.0 mg, 81% yield) as a colorless oil.

<sup>1</sup>H NMR (400 MHz, CDCl<sub>3</sub>) δ 0.90 (t, *J* = 7.4 Hz, 3H), 1.21-1.34 (m, 1H), 1.46-1.62 (m, 2H), 1.64-1.83 (m, 2H), 1.97 (dd, *J* = 13.9, 5.1 Hz, 1H), 2.01-2.17 (m, 2H), 2.26-2.40 (m, 3H), 2.47 (dd, *J* = 12.2, 5.7 Hz, 1H), 2.51-2.65 (m, 3H), 3.73 (s, 3H), 3.74 (s, 3H); <sup>13</sup>C NMR (100 MHz, CDCl<sub>3</sub>) δ 10.9, 26.1, 27.8, 38.0, 38.8, 40.5, 42.0, 43.1, 46.5, 46.9, 53.0, 53.0, 58.7, 173.0, 173.0, 212.8. IR (film): 2956, 1731, 1699, 1434, 1360, 1254, 1220, 1196, 1173, 1149, 1071 cm<sup>-1</sup>. HRMS (ESI) *m/z* calcd. For C<sub>16</sub>H<sub>24</sub>O<sub>5</sub> (M+Na)<sup>+</sup> 319.1516, found 319.1515.



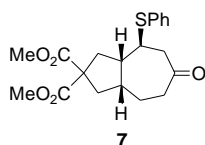

6-Oxo-4-phenylsulfanyl-octahydro-azulene-2,2-dicarboxylic acid dimethyl ester (**7**). To a solution of enone **5** (26.6 mg, 0.1 mmol) in  $\text{CHCl}_3$  (0.5 mL) was added PhSH (11.1 mg, 0.1 mmol) and  $\text{Et}_3\text{N}$  (3 mg, 0.03 mmol). The reaction was stirred at room temperature for 2h. Purification by flash column chromatography on silica gel (1:3 EtOAc/Hexane) gave compound **7** (36.0 mg, 96% yield) as a colorless oil.

$^1\text{H}$  NMR (400 MHz,  $\text{CDCl}_3$ )  $\delta$  1.63-1.84 (m, 2H), 2.07 (dd,  $J = 14.0, 4.0$  Hz, 1H), 2.28-2.73 (m, 8H), 2.89 (dd,  $J = 15.4, 2.1$  Hz, 1H), 3.34 (t,  $J = 7.7$  Hz, 1H), 3.74 (s, 3H), 3.75 (s, 3H), 7.18-7.37 (m, 3H), 7.37 – 7.58 (m, 2H);  $^{13}\text{C}$  NMR (100 MHz,  $\text{CDCl}_3$ )  $\delta$  25.7, 39.0, 41.0, 41.6, 42.4, 45.9, 47.0, 48.2, 53.1, 53.2, 58.3, 128.1, 129.4, 132.9, 133.3, 172.8, 172.9, 210.2. IR (film): 2952, 2358, 1729, 1702, 1435, 1253, 1200, 1164, 745, 693  $\text{cm}^{-1}$ . HRMS (ESI)  $m/z$  calcd. For  $\text{C}_{20}\text{H}_{24}\text{O}_5\text{S}$  ( $\text{M}+\text{Na}$ ) $^+$  399.1237, found 399.1246.

## References:

- (1) Y. Kabbaj, H. B. Lazrek, J. L. Barascut, J. L. Imbach *Nucleosides Nucleotides Nucleic Acids* **2005**, *24*, 161.
- (2) X.-z. Shu, Li, X.; D. Shu, S. Huang, C. M. Schienebeck, X. Zhou; P. J. Robichaux, W. Tang, *J. Am. Chem. Soc.* **2012**, *134*, 5211.
- (3) (a) X.-z. Shu, S. Huang, D. Shu, I. A. Guzei, W. Tang, *Angew. Chem. Int. Ed.* **2011**, *50*, 8153;  
(b) C. M. Schienebeck, P. J. Robichaux, X. Li, L. Chen, W. Tang, *Chem. Commun.* **2013**, *49*, 2616.
- (4) D. W. Xu, Z. Y. Li, S. Ma, *Tetrahedron Lett.* **2003**, *44*, 6343.
- (5) M. A. Boone, F. E. McDonald, J. Lichter, S. Lutz, R. Cao, K. I. Hardcastle, *Org. Lett.* **2009**, *11*, 851.

HPLC analysis for **1b**, **1m**, **1n**, **2b**, **2m**, and **2n**.

(-)-**1b**: 94% *ee* determined by HPLC analysis of the corresponding alcohol: AD-H column (hexane/*i*PrOH = 95/5), 0.7 mL/min, *t*-major = 22.0 min, and *t*-minor = 24.1 min. For alcohol:  $[\alpha]_D = -20.3^\circ$  (c 1.00, CH<sub>2</sub>Cl<sub>2</sub>); For **1b**:  $[\alpha]_D = -16.7^\circ$  (c 1.00, CH<sub>2</sub>Cl<sub>2</sub>).

Racemic sample **1b**:

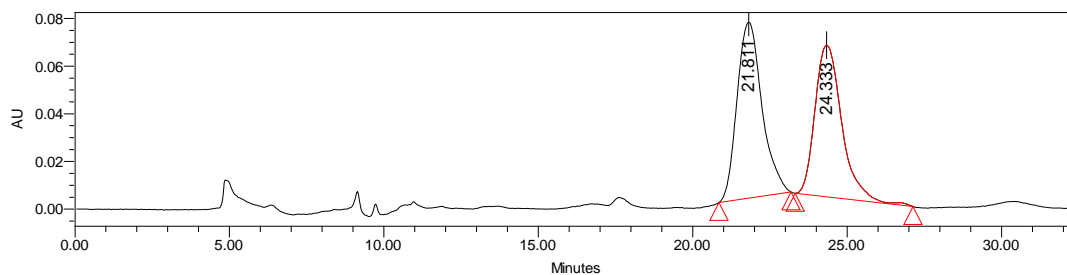

| Name | Retention Time | Area    | % Area | Height | Int Type | Amount | Units | Peak Type | Peak Codes |
|------|----------------|---------|--------|--------|----------|--------|-------|-----------|------------|
| 1    | 21.811         | 4141767 | 51.90  | 73787  | bb       |        |       | Unknown   |            |
| 2    | 24.333         | 3837972 | 48.10  | 63637  | bb       |        |       | Unknown   |            |

Enantio-enriched sample (-)-**1b**:

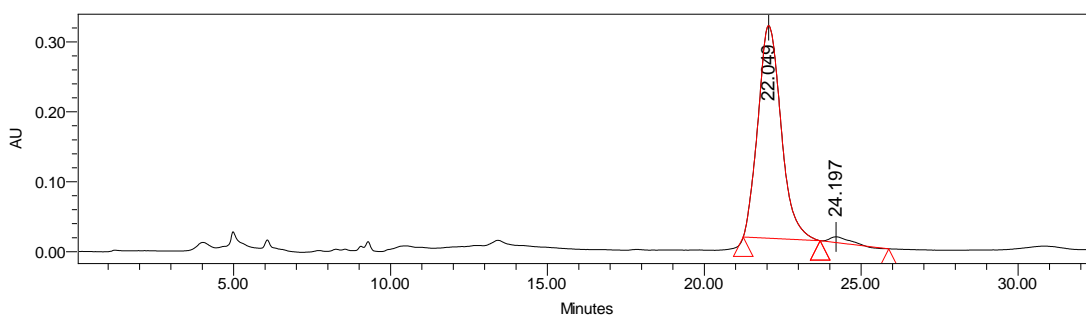

| Name | Retention Time | Area     | % Area | Height | Int Type | Amount | Units | Peak Type | Peak Codes |
|------|----------------|----------|--------|--------|----------|--------|-------|-----------|------------|
| 1    | 22.049         | 15620052 | 97.49  | 304043 | bb       |        |       | Unknown   |            |
| 2    | 24.197         | 402202   | 2.51   | 8292   | bb       |        |       | Unknown   |            |

(-)-**1m**: 98% ee determined by HPLC analysis: AD-H column (hexane/iPrOH = 90/10), 0.7 mL/min, t-major = 13.7 min, and t-minor = 15.7 min.  $[\alpha]_D = -10.9$  (c 1.00, CH<sub>2</sub>Cl<sub>2</sub>).

**Racemic sample 1m:**

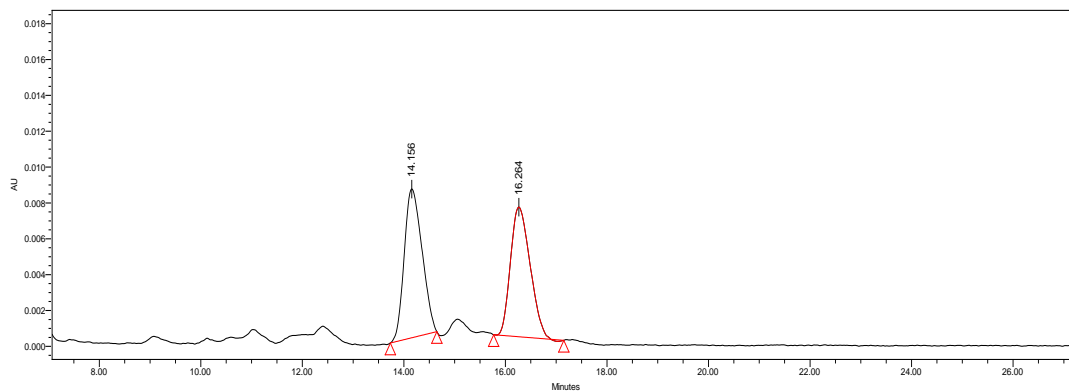

|   | Retention Time | Area   | % Area | Height | Int Type |
|---|----------------|--------|--------|--------|----------|
| 1 | 14.156         | 198635 | 49.96  | 8303   | bb       |
| 2 | 16.264         | 198953 | 50.04  | 7234   | bb       |

**Enantio-enriched sample (-)-1m:**

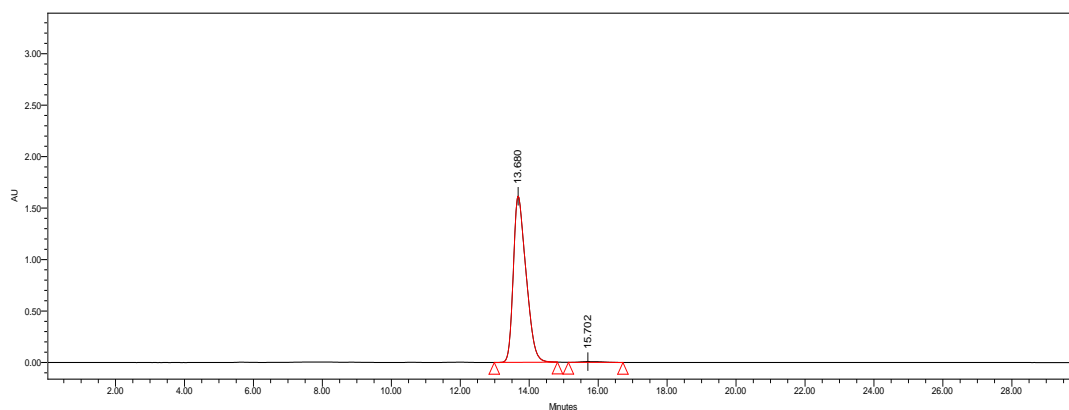

|   | Retention Time | Area     | % Area | Height  | Int Type |
|---|----------------|----------|--------|---------|----------|
| 1 | 13.680         | 41313854 | 99.19  | 1615100 | bb       |
| 2 | 15.702         | 335386   | 0.81   | 7481    | bb       |

(-)-**1n**: 95% ee determined by HPLC analysis: Chiralpak 1A column (hexane/iPrOH = 85/15), 0.7 mL/min, t-major = 75.7 min, and t-minor = 64.8 min.  $[\alpha]_D = -7.6$  (c 1.00, CH<sub>2</sub>Cl<sub>2</sub>).

Raceimic sample **1n**:

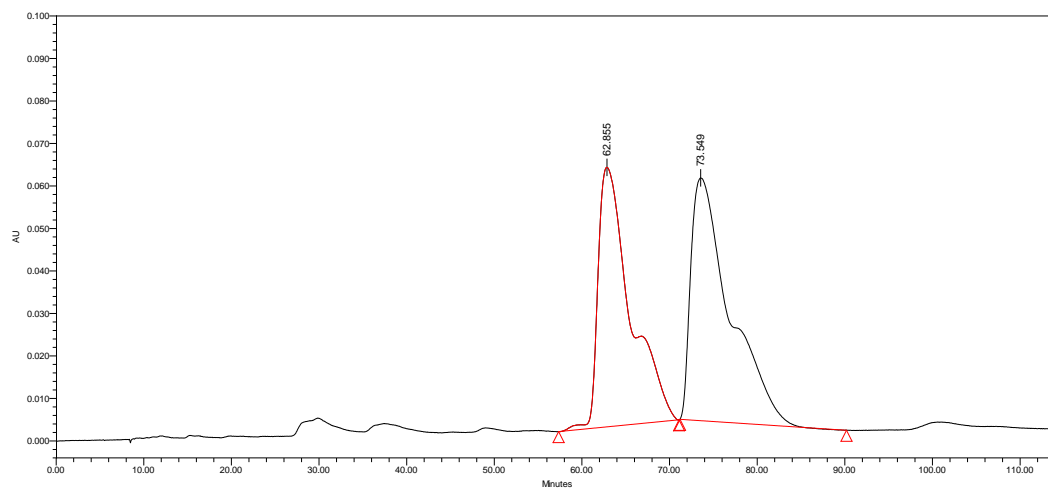

|   | Retention Time | Area     | % Area | Height |
|---|----------------|----------|--------|--------|
| 1 | 62.855         | 15554285 | 46.75  | 61078  |
| 2 | 73.549         | 17718337 | 53.25  | 57163  |

Enantio-enriched sample (-)-**1n**:

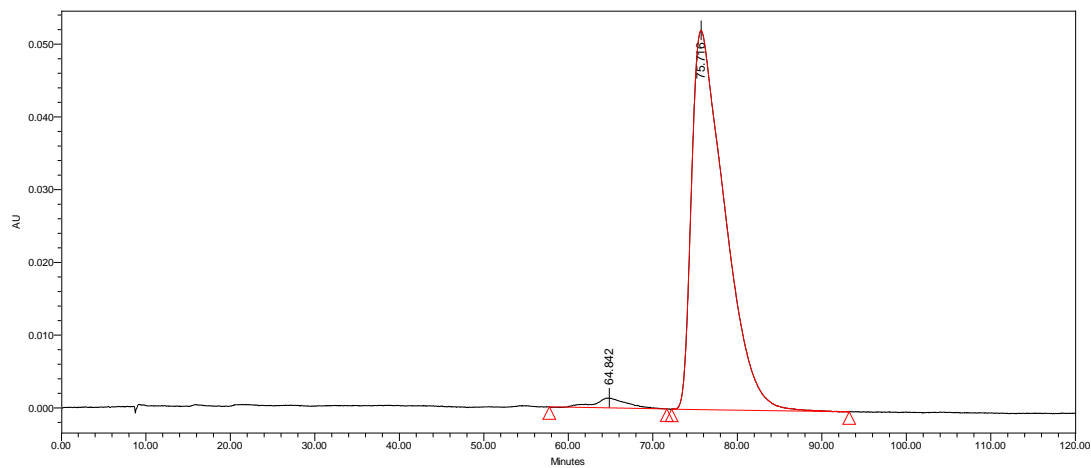

|   | Retention Time | Area     | % Area | Height |
|---|----------------|----------|--------|--------|
| 1 | 64.842         | 367440   | 2.52   | 1374   |
| 2 | 75.716         | 14225197 | 97.48  | 52123  |

(-)-**2b**: 89% *ee* determined by HPLC analysis: AS-H column (hexane/*i*PrOH = 100/1), 0.6 mL/min, *t*-minor = 16.2 min, *t*-major = 18.9 min.  $[\alpha]_D = -14.0^\circ$  (c 1.00, CH<sub>2</sub>Cl<sub>2</sub>).

Racemic sample **2b**:

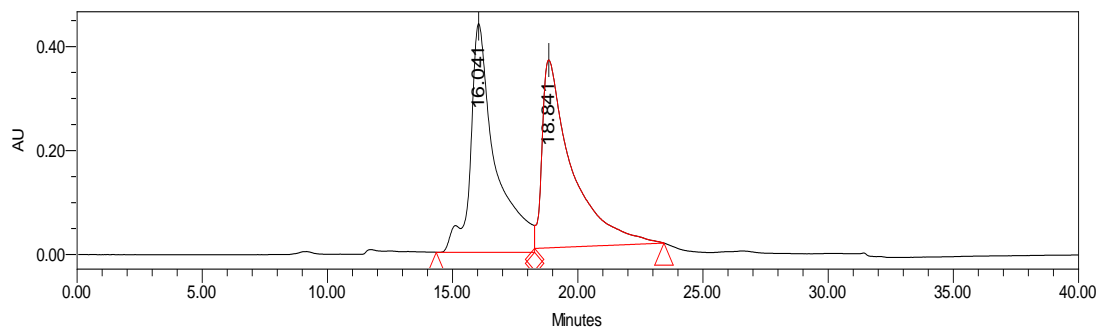

| Name | Retention Time | Area     | % Area | Height | Int Type | Amount | Units | Peak Type | Peak Codes |
|------|----------------|----------|--------|--------|----------|--------|-------|-----------|------------|
| 1    | 16.041         | 30473946 | 50.47  | 439757 | bV       |        |       | Unknown   |            |
| 2    | 18.841         | 29905760 | 49.53  | 361029 | Vb       |        |       | Unknown   |            |

Enantio-enriched sample (-)-**2b**:

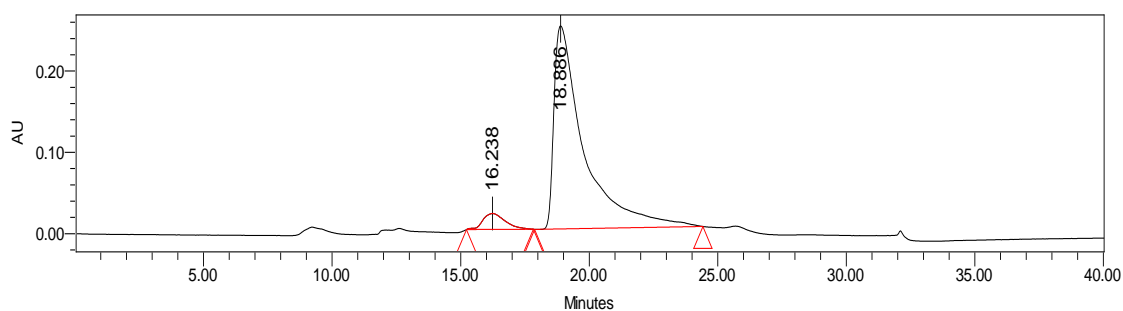

| Name | Retention Time | Area     | % Area | Height | Int Type | Amount | Units | Peak Type | Peak Codes |
|------|----------------|----------|--------|--------|----------|--------|-------|-----------|------------|
| 1    | 16.238         | 1176763  | 5.51   | 19652  | bb       |        |       | Unknown   |            |
| 2    | 18.886         | 20199021 | 94.49  | 249740 | bb       |        |       | Unknown   |            |

(-)-**2m**: 90% *ee* determined by HPLC analysis: AD-H column (hexane/iPrOH = 95/5), 0.7 mL/min, t-major = 37.9 min, and t-minor = 35.1 min.  $[\alpha]_D^{25} = -35.3$  (c 1.00, CH<sub>2</sub>Cl<sub>2</sub>).

Racemic sample **2m**:

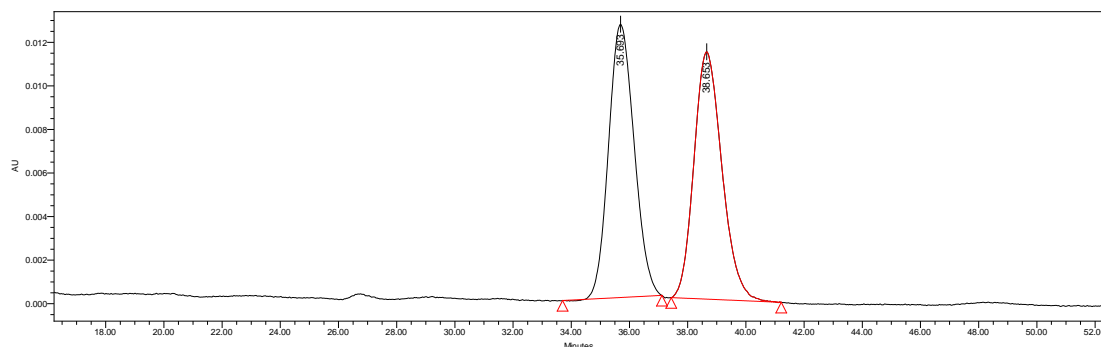

|   | Retention Time | Area   | % Area | Height | Int Type |
|---|----------------|--------|--------|--------|----------|
| 1 | 35.693         | 769105 | 50.36  | 12545  | Bb       |
| 2 | 38.653         | 758210 | 49.64  | 11354  | bb       |

Enantio-enriched sample (-)-**2m**:

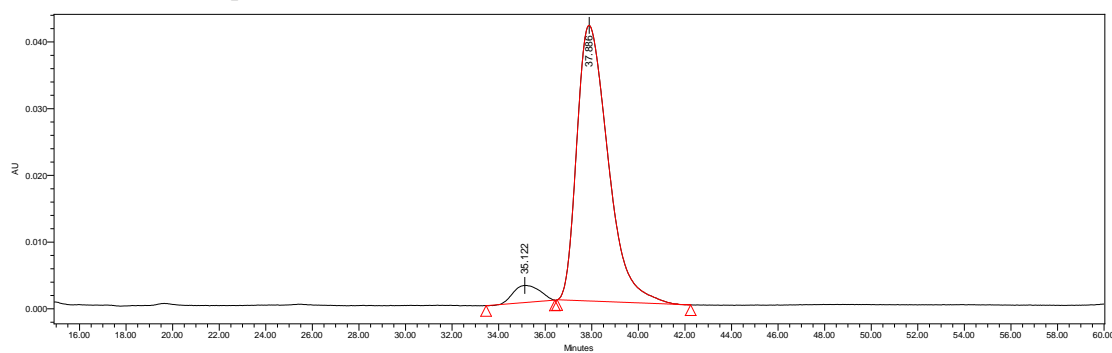

|   | Retention Time | Area    | % Area | Height | Int Type |
|---|----------------|---------|--------|--------|----------|
| 1 | 35.122         | 203109  | 5.01   | 2564   | Bb       |
| 2 | 37.886         | 3847460 | 94.99  | 41307  | bb       |

(-)-**2n**: 86% *ee* determined by HPLC analysis: Chiralpak 1A column (hexane/*i*PrOH = 30/70), 0.7 mL/min, *t*-major = 53.5 min, and *t*-minor = 59.1 min.  $[\alpha]_D^{25} = -10.5$  (c 1.00, CH<sub>2</sub>Cl<sub>2</sub>).

Raceimic Sample **2n**:

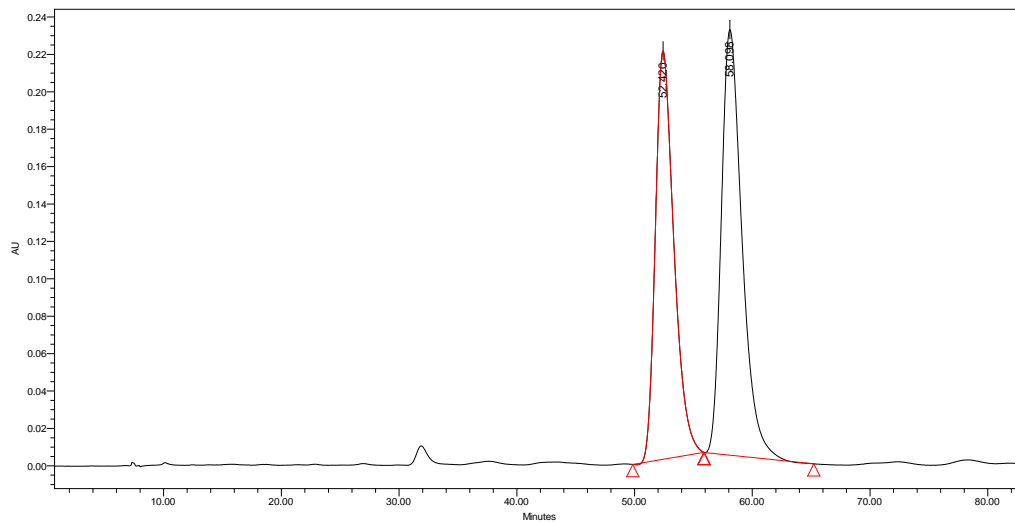

|   | Retention Time | Area     | % Area | Height |
|---|----------------|----------|--------|--------|
| 1 | 52.420         | 23965838 | 46.26  | 218332 |
| 2 | 58.098         | 27841338 | 53.74  | 227529 |

Enantio-enriched sample (-)-**2n**:

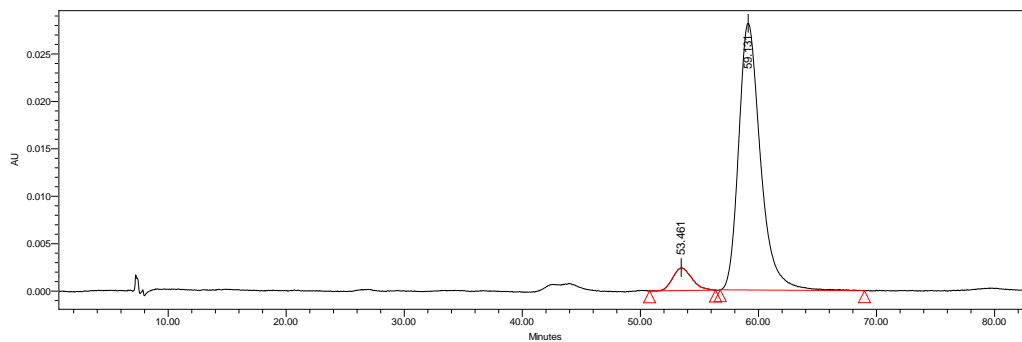

|   | Retention Time | Area    | % Area | Height |
|---|----------------|---------|--------|--------|
| 1 | 53.461         | 269950  | 6.96   | 2427   |
| 2 | 59.131         | 3606931 | 93.04  | 28104  |

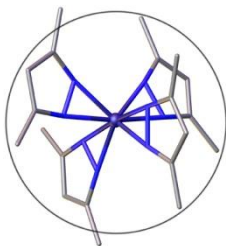

---

MOLECULAR STRUCTURE LABORATORY

---

ILIA A. GUZEI, PH.D.

---

University of Wisconsin-Madison  
2124 Chemistry Department  
1101 University Ave  
Madison, WI 53706

☎ 608-263-4694  
Fax 608-262-0381

E-mail: [iguzei@chem.wisc.edu](mailto:iguzei@chem.wisc.edu)

---

Structural report on **2n**  
(CCDC977964)

MAY 7, 2013



## Crystallographic Experimental Section

### *Data Collection*

A colorless crystal with approximate dimensions 0.4 x 0.2 x 0.1 mm<sup>3</sup> was selected under oil under ambient conditions and attached to the tip of a MiTeGen MicroMount©. The crystal was mounted in a stream of cold nitrogen at 100(1) K and centered in the X-ray beam by using a video camera.

The crystal evaluation and data collection were performed on a Bruker Quazar SMART APEXII diffractometer with Mo K<sub>α</sub> ( $\lambda = 0.71073 \text{ \AA}$ ) radiation and the diffractometer to crystal distance of 4.96 cm.

The initial cell constants were obtained from three series of  $\omega$  scans at different starting angles. Each series consisted of 12 frames collected at intervals of 0.5° in a 6° range about  $\omega$  with the exposure time of 5 seconds per frame. The reflections were successfully indexed by an automated indexing routine built in the APEXII program suite. The final cell constants were calculated from a set of 9956 strong reflections from the actual data collection.

The data were collected by using the full sphere data collection routine to survey the reciprocal space to the extent of a full sphere to a resolution of 0.70 Å. A total of 57938 data were harvested by collecting 5 sets of frames with 0.5° scans in  $\omega$  and  $\phi$  with exposure times of 30 sec per frame. These highly redundant datasets were corrected for Lorentz and polarization effects. The absorption correction was based on fitting a function to the empirical transmission surface as sampled by multiple equivalent measurements. [1]

### **Structure Solution and Refinement**

The systematic absences in the diffraction data were consistent for the space groups *C2*, *Cm*, and *C2/m*. The *E*-statistics strongly suggested the non-centrosymmetric space group *C2* that yielded chemically reasonable and computationally stable results of refinement [2-4].

A successful solution by the direct methods provided most non-hydrogen atoms from the *E*-map. The remaining non-hydrogen atoms were located in an alternating series of least-squares

cycles and difference Fourier maps. All non-disordered non-hydrogen atoms were refined with anisotropic displacement coefficients. All hydrogen atoms were included in the structure factor calculation at idealized positions and were allowed to ride on the neighboring atoms with relative isotropic displacement coefficients.

The asymmetric unit contains two symmetry independent molecules with the same composition, connectivity, and absolute configuration, C8(S), C14(R). The two molecules differ in the orientation of the bicyclic fragment. In the Br1A molecule six atoms in the bicyclic unit are disordered over two positions with the major component contribution of 64.8(2)%. The disordered atoms were refined isotropically with constraints and geometrical restraints. Additionally, all phenyl rings were refined with an idealized geometry.

Whereas the absolute structure was unambiguously established by anomalous dispersion effects the statistical indicators point to the presence of the opposite diastereomer in the amount of 4.3(9)%.

There were three partially occupied solvate molecules disordered over two-fold axes in the asymmetric unit. A significant amount of time was invested in identifying and refining the disordered molecules. Bond length restraints were applied to model the molecules but the resulting isotropic displacement coefficients suggested the molecules were mobile. In addition, the refinement was computationally unstable. Option SQUEEZE of program PLATON [5] was used to correct the diffraction data for diffuse scattering effects and to identify the solvent molecules. PLATON calculated the upper limit of volume that can be occupied by the solvent to be 1436 Å<sup>3</sup>, or 25.7% of the unit cell volume. The program calculated 365 electrons in the unit cell for the diffuse species. Six solvents were used in the synthesis/crystallization and it is hard to match the number of electrons to a specific solvent. Compositional disorder between two solvent molecules of different nature at each solvent site is plausible. Please note that all derived results in the following tables are based on the known contents. No data are given for the diffusely scattering species.

The final least-squares refinement of 519 parameters against 13840 data resulted in residuals  $R$  (based on  $F^2$  for  $I \geq 2\sigma$ ) and  $wR$  (based on  $F^2$  for all data) of 0.0499 and 0.1259, respectively. The final difference Fourier map was featureless.

## Summary

**Crystal Data** for  $C_{24}H_{25}BrN_2O_4S$  ( $M = 517.43$ ): monoclinic, space group  $C2$  (no. 5),  $a = 9.512(4)$  Å,  $b = 19.054(7)$  Å,  $c = 30.838(14)$  Å,  $\beta = 93.810(8)^\circ$ ,  $V = 5577(4)$  Å<sup>3</sup>,  $Z = 8$ ,  $T = 100.0$  K,  $\mu(\text{MoK}\alpha) = 1.577$  mm<sup>-1</sup>,  $D_{\text{calc}} = 1.233$  g/mm<sup>3</sup>, 57938 reflections measured ( $2.648 \leq 2\theta \leq 56.68$ ), 13840 unique ( $R_{\text{int}} = 0.0399$ ) which were used in all calculations. The final  $R_1$  was 0.0499 ( $I > 2\sigma(I)$ ) and  $wR_2$  was 0.1259 (all data).

## References

- [1] Bruker-AXS. (2007-2013) APEX2 (Ver. 2013.2-0), SADABS (2012-1), and SAINT+ (Ver. 8.30C) Software Reference Manuals. Bruker-AXS, Madison, Wisconsin, USA.
- [2] Sheldrick, G. M. (2008) SHELXL. *Acta Cryst.* **A64**, 112-122.
- [3] Dolomanov, O.V.; Bourhis, L.J.; Gildea, R.J.; Howard, J.A.K.; Puschmann, H. "OLEX2: a complete structure solution, refinement and analysis program". *J. Appl. Cryst.* (2009) **42**, 339-341.
- [4] Guzei, I.A. (2013). Internal laboratory computer programs Gn.
- [5] A.L. Spek (1990) *Acta Cryst.* A46, C34.

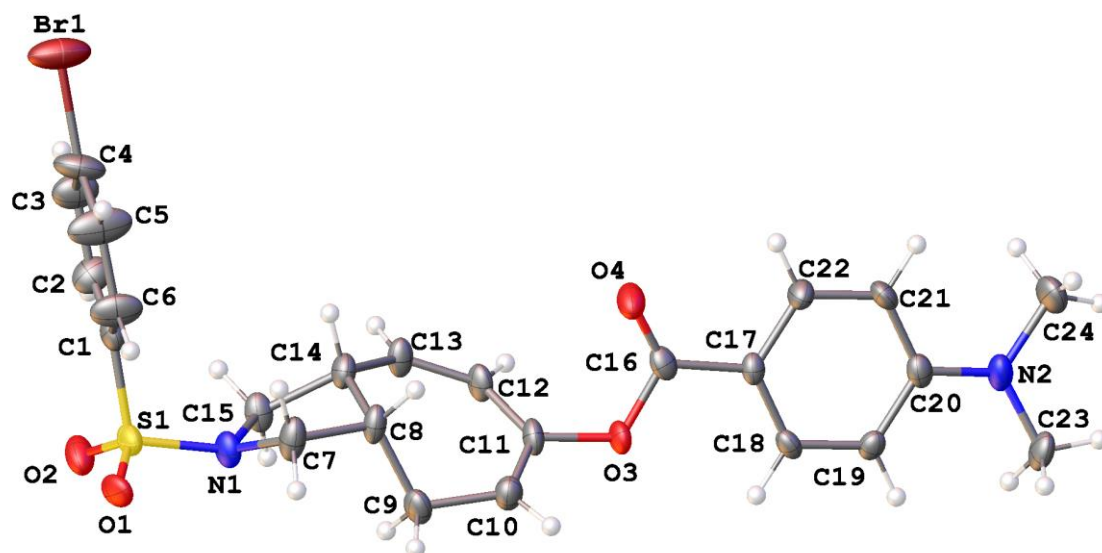

Figure S1. A molecular drawing of the Br1 molecule of **2n** shown with 50% probability ellipsoids.

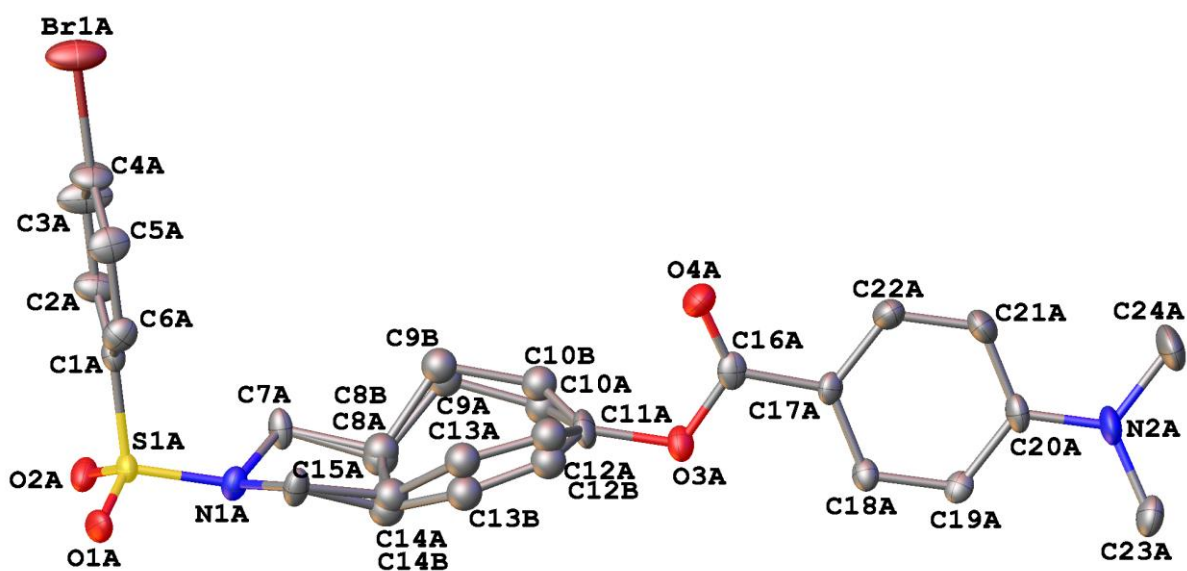

Figure S2. A molecular drawing of the Br1A molecule of **2n** shown with 50% probability ellipsoids. All H atoms are omitted, but all disordered atoms are shown.

Table 1 Crystal data and structure refinement for **2n**

|                                             |                                                                   |
|---------------------------------------------|-------------------------------------------------------------------|
| Identification code                         | <b>2n</b>                                                         |
| Empirical formula                           | C <sub>24</sub> H <sub>25</sub> BrN <sub>2</sub> O <sub>4</sub> S |
| Formula weight                              | 517.43                                                            |
| Temperature/K                               | 100.0                                                             |
| Crystal system                              | monoclinic                                                        |
| Space group                                 | C2                                                                |
| a/Å                                         | 9.512(4)                                                          |
| b/Å                                         | 19.054(7)                                                         |
| c/Å                                         | 30.838(14)                                                        |
| α/°                                         | 90                                                                |
| β/°                                         | 93.810(8)                                                         |
| γ/°                                         | 90                                                                |
| Volume/Å <sup>3</sup>                       | 5577(4)                                                           |
| Z                                           | 8                                                                 |
| ρ <sub>calc</sub> /mg/mm <sup>3</sup>       | 1.233                                                             |
| m/mm <sup>-1</sup>                          | 1.577                                                             |
| F(000)                                      | 2128.0                                                            |
| Crystal size/mm <sup>3</sup>                | 0.4 × 0.2 × 0.1                                                   |
| 2θ range for data collection                | 2.648 to 56.68°                                                   |
| Index ranges                                | -12 ≤ h ≤ 12, -25 ≤ k ≤ 25, -41 ≤ l ≤ 41                          |
| Reflections collected                       | 57938                                                             |
| Independent reflections                     | 13840[R(int) = 0.0399]                                            |
| Data/restraints/parameters                  | 13840/80/519                                                      |
| Goodness-of-fit on F <sup>2</sup>           | 1.062                                                             |
| Final R indexes [I ≥ 2σ (I)]                | R <sub>1</sub> = 0.0499, wR <sub>2</sub> = 0.1229                 |
| Final R indexes [all data]                  | R <sub>1</sub> = 0.0570, wR <sub>2</sub> = 0.1259                 |
| Largest diff. peak/hole / e Å <sup>-3</sup> | 0.72/-0.45                                                        |
| Flack parameter                             | 0.043(9)                                                          |

Table 2 Fractional Atomic Coordinates (×10<sup>4</sup>) and Equivalent Isotropic Displacement Parameters (Å<sup>2</sup>×10<sup>3</sup>) for **2n**. U<sub>eq</sub> is defined as 1/3 of the trace of the orthogonalised U<sub>ij</sub> tensor.

| Atom | x         | y         | z         | U(eq)   |
|------|-----------|-----------|-----------|---------|
| Br1  | 2305.8(7) | 8491.7(5) | 4762.2(2) | 58.9(2) |

|      |            |            |            |           |
|------|------------|------------|------------|-----------|
| S1   | 3417.2(14) | 7871.1(6)  | 6793.5(4)  | 27.7(3)   |
| O3   | 3427(4)    | 3659.3(16) | 6928.6(11) | 25.5(7)   |
| N1   | 3511(4)    | 7034(2)    | 6867.2(15) | 27.6(9)   |
| C7   | 4736(5)    | 6665(2)    | 6695(2)    | 35.3(12)  |
| C8   | 4274(4)    | 5897(2)    | 6689.8(16) | 26.6(9)   |
| C9   | 4550(5)    | 5531(2)    | 7127.4(17) | 29.7(11)  |
| C10  | 4492(5)    | 4747(2)    | 7086.6(17) | 29.1(10)  |
| C11  | 3382(5)    | 4399(2)    | 6903.5(16) | 25.7(10)  |
| C12  | 2033(5)    | 4682(2)    | 6734.2(17) | 26.9(10)  |
| C13  | 1750(5)    | 5338(2)    | 6601.4(18) | 27.3(10)  |
| C14  | 2687(5)    | 5957(2)    | 6557.5(16) | 26.5(10)  |
| C15  | 2202(5)    | 6596(2)    | 6812.1(18) | 28.5(10)  |
| O1   | 4784(4)    | 8155.2(19) | 6923.4(12) | 35.3(9)   |
| O2   | 2205(5)    | 8115(2)    | 6994.3(13) | 39.6(9)   |
| O4   | 3247(5)    | 3602(2)    | 6198.7(12) | 37.7(9)   |
| N2   | 2992(5)    | 359(2)     | 6732.2(16) | 32.1(10)  |
| C1   | 3140(3)    | 8029.3(19) | 6238.0(8)  | 26.3(10)  |
| C2   | 1769(3)    | 8031(2)    | 6051.2(10) | 35.2(12)  |
| C3   | 1520(3)    | 8175(2)    | 5610.8(11) | 42.6(14)  |
| C4   | 2641(4)    | 8316(3)    | 5357.3(8)  | 46.8(16)  |
| C5   | 4012(3)    | 8314(3)    | 5544.1(11) | 59(2)     |
| C6   | 4261(3)    | 8170(2)    | 5984.5(11) | 43.4(15)  |
| C16  | 3318(5)    | 3306(3)    | 6542.8(16) | 24.4(9)   |
| C17  | 3311(3)    | 2529.9(10) | 6602.4(9)  | 21.0(9)   |
| C18  | 3498(3)    | 2216.8(13) | 7009.3(7)  | 21.7(9)   |
| C19  | 3425(3)    | 1491.1(14) | 7047.8(7)  | 22.1(9)   |
| C20  | 3166(4)    | 1078.4(10) | 6679.4(9)  | 25.5(10)  |
| C21  | 2980(4)    | 1391.5(14) | 6272.5(8)  | 28.7(10)  |
| C22  | 3052(4)    | 2117.3(14) | 6234.0(7)  | 27.1(10)  |
| C23  | 3372(6)    | 23(3)      | 7136.6(19) | 33.6(12)  |
| C24  | 2692(7)    | -91(3)     | 6351(2)    | 42.3(14)  |
| Br1A | 7844.4(5)  | 813.3(4)   | 10149.5(2) | 44.79(18) |
| S1A  | 5851.9(12) | 1200.8(5)  | 8142.0(4)  | 19.8(2)   |
| O3A  | 5933(3)    | 5473.7(16) | 8204.3(11) | 24.6(7)   |
| N1A  | 5718(4)    | 2031.5(19) | 8054.1(13) | 22.6(8)   |
| C7A  | 4670(4)    | 2429(2)    | 8288.4(17) | 23.6(9)   |
| C8B  | 4928(9)    | 3192(3)    | 8180(3)    | 29.2(6)   |

|      |          |            |            |          |
|------|----------|------------|------------|----------|
| C9B  | 4944(11) | 3653(4)    | 8578(3)    | 29.2(6)  |
| C10B | 4910(9)  | 4423(4)    | 8482(3)    | 29.2(6)  |
| C11A | 5951(5)  | 4736(2)    | 8283.8(17) | 27.2(10) |
| C12B | 7246(8)  | 4411(4)    | 8161(4)    | 29.2(6)  |
| C13B | 7364(8)  | 3755(4)    | 8021(4)    | 29.2(6)  |
| C14B | 6297(8)  | 3184(3)    | 7931(3)    | 29.2(6)  |
| C15A | 7000(5)  | 2471(2)    | 8056.9(17) | 24.6(10) |
| O1A  | 6957(4)  | 943.5(17)  | 7889.7(11) | 27.9(7)  |
| O2A  | 4466(4)  | 911.3(18)  | 8085.7(10) | 26.8(7)  |
| O4A  | 6717(4)  | 5616.3(19) | 8900.3(12) | 34.0(8)  |
| N2A  | 6182(5)  | 8786(2)    | 8253.0(15) | 31.9(10) |
| C1A  | 6403(3)  | 1098.0(17) | 8688.3(7)  | 19.0(9)  |
| C2A  | 5416(2)  | 1004(2)    | 8995.9(9)  | 29.4(11) |
| C3A  | 5857(3)  | 921(2)     | 9431.7(8)  | 37.1(13) |
| C4A  | 7286(3)  | 932(2)     | 9559.8(7)  | 30.1(11) |
| C5A  | 8273(2)  | 1026(2)    | 9252.3(9)  | 28.9(11) |
| C6A  | 7832(2)  | 1108.9(18) | 8816.5(8)  | 26.3(10) |
| C8A  | 4899(13) | 3186(5)    | 8144(5)    | 29.2(6)  |
| C9A  | 4662(18) | 3700(6)    | 8509(5)    | 29.2(6)  |
| C10A | 4717(12) | 4453(6)    | 8369(6)    | 29.2(6)  |
| C12A | 7332(11) | 4416(6)    | 8284(6)    | 29.2(6)  |
| C13A | 7473(13) | 3742(5)    | 8178(8)    | 29.2(6)  |
| C14A | 6423(12) | 3214(5)    | 7995(5)    | 29.2(6)  |
| C16A | 6339(4)  | 5871(3)    | 8554.3(15) | 23.0(9)  |
| C17A | 6226(3)  | 6628.9(10) | 8458.5(9)  | 19.4(8)  |
| C18A | 5997(3)  | 6892.7(12) | 8039.5(8)  | 20.1(9)  |
| C19A | 5958(3)  | 7613.6(13) | 7970.8(7)  | 20.2(9)  |
| C20A | 6147(3)  | 8070.8(10) | 8321.0(9)  | 25.1(10) |
| C21A | 6376(4)  | 7807.1(14) | 8740.0(8)  | 31.8(11) |
| C22A | 6415(4)  | 7086.1(15) | 8808.8(7)  | 27.5(10) |
| C23A | 6158(6)  | 9076(3)    | 7818.3(18) | 30.8(11) |
| C24A | 6083(9)  | 9265(3)    | 8616(2)    | 53.4(18) |

Table 3 Anisotropic Displacement Parameters ( $\text{\AA}^2 \times 10^3$ ) for **2n**. The Anisotropic displacement factor exponent takes the form:  $-2\pi^2[h^2a^2U_{11} + \dots + 2hka \times b \times U_{12}]$

| Atom | U <sub>11</sub> | U <sub>22</sub> | U <sub>33</sub> | U <sub>23</sub> | U <sub>13</sub> | U <sub>12</sub> |
|------|-----------------|-----------------|-----------------|-----------------|-----------------|-----------------|
|------|-----------------|-----------------|-----------------|-----------------|-----------------|-----------------|



|      |          |          |          |           |           |           |
|------|----------|----------|----------|-----------|-----------|-----------|
| Br1  | 38.3(3)  | 109.4(7) | 28.1(3)  | 5.0(4)    | -4.7(2)   | -3.2(4)   |
| S1   | 41.3(7)  | 14.6(5)  | 27.0(6)  | -1.7(5)   | 0.4(5)    | -3.2(5)   |
| O3   | 32.7(18) | 11.6(15) | 32.0(18) | -2.4(13)  | -0.1(14)  | -2.3(12)  |
| N1   | 27(2)    | 16.2(19) | 39(2)    | -2.6(17)  | 0.2(17)   | -4.3(16)  |
| C7   | 26(2)    | 20(2)    | 59(4)    | 2(2)      | -3(2)     | 0(2)      |
| C8   | 20.4(19) | 15(2)    | 44(3)    | 2(2)      | 2.2(18)   | 1.5(17)   |
| C9   | 29(2)    | 20(2)    | 40(3)    | -7(2)     | -6(2)     | -2.5(18)  |
| C10  | 29(2)    | 22(2)    | 36(3)    | -1(2)     | -3(2)     | 2.6(19)   |
| C11  | 31(2)    | 12(2)    | 35(3)    | -1.8(19)  | 8(2)      | 0.7(18)   |
| C12  | 24(2)    | 15(2)    | 42(3)    | -3(2)     | 1(2)      | -4.6(17)  |
| C13  | 18(2)    | 18(2)    | 46(3)    | -1(2)     | 1.2(19)   | 1.2(17)   |
| C14  | 30(2)    | 16(2)    | 34(2)    | 2.8(19)   | 3.5(19)   | 1.6(18)   |
| C15  | 21(2)    | 22(2)    | 44(3)    | -4(2)     | 6(2)      | -1.4(18)  |
| O1   | 50(2)    | 18.9(17) | 35(2)    | -5.2(15)  | -9.7(16)  | -11.7(16) |
| O2   | 64(3)    | 24.1(18) | 33(2)    | -1.6(15)  | 15.1(18)  | 6.7(18)   |
| O4   | 63(3)    | 22.6(18) | 28.0(19) | 0.9(15)   | 9.8(17)   | 7.4(18)   |
| N2   | 32(2)    | 17(2)    | 46(3)    | -4.2(18)  | -9.0(19)  | 1.6(16)   |
| C1   | 33(2)    | 15(2)    | 31(3)    | -5.0(18)  | 1(2)      | -0.7(18)  |
| C2   | 30(2)    | 39(3)    | 36(3)    | 9(2)      | 4(2)      | -3(2)     |
| C3   | 27(2)    | 61(4)    | 39(3)    | 2(3)      | -5(2)     | 1(3)      |
| C4   | 47(3)    | 70(5)    | 22(3)    | -10(3)    | -5(2)     | -10(3)    |
| C5   | 21(2)    | 117(7)   | 39(3)    | 12(4)     | 2(2)      | 1(3)      |
| C6   | 21(2)    | 73(4)    | 35(3)    | 4(3)      | -6(2)     | -8(3)     |
| C16  | 20(2)    | 22(2)    | 31(2)    | -6.8(19)  | 5.5(17)   | 0.6(17)   |
| C17  | 18.9(19) | 15(2)    | 29(2)    | -1.5(18)  | 3.0(17)   | 1.0(16)   |
| C18  | 19.6(19) | 19(2)    | 26(2)    | -8.6(18)  | -1.4(17)  | -0.9(16)  |
| C19  | 19(2)    | 19(2)    | 27(2)    | 2.3(18)   | -4.6(17)  | -0.4(17)  |
| C20  | 22(2)    | 20(2)    | 35(3)    | -4.5(18)  | -0.4(18)  | 1.9(16)   |
| C21  | 38(3)    | 22(2)    | 26(2)    | -10.5(19) | -4.6(19)  | 2(2)      |
| C22  | 39(3)    | 19(2)    | 23(2)    | 2.1(19)   | 1.8(19)   | 3(2)      |
| C23  | 37(3)    | 16(2)    | 46(3)    | 7(2)      | -5(2)     | -1(2)     |
| C24  | 56(4)    | 23(3)    | 46(3)    | -10(2)    | -10(3)    | -4(2)     |
| Br1A | 24.7(2)  | 87.1(5)  | 21.8(2)  | 2.2(3)    | -4.23(17) | -2.6(3)   |
| S1A  | 27.0(5)  | 11.3(5)  | 20.8(5)  | -0.7(4)   | 0.5(4)    | 0.7(4)    |
| O3A  | 27.0(16) | 16.6(16) | 29.7(18) | -1.1(13)  | -3.5(13)  | -1.9(12)  |
| N1A  | 24.2(18) | 16.3(18) | 28(2)    | 2.7(15)   | 5.1(15)   | -0.1(15)  |
| C7A  | 16.7(19) | 14(2)    | 40(3)    | -2.8(19)  | 2.8(18)   | 1.1(16)   |

|      |          |          |          |          |          |          |
|------|----------|----------|----------|----------|----------|----------|
| C11A | 31(2)    | 13(2)    | 36(3)    | -4.6(19) | -7(2)    | -3.7(18) |
| C15A | 23(2)    | 16(2)    | 36(3)    | 3.5(19)  | 11.1(19) | -1.1(17) |
| O1A  | 41.8(18) | 16.4(16) | 26.2(16) | -1.3(13) | 8.9(14)  | 8.6(14)  |
| O2A  | 34.9(17) | 17.6(16) | 26.6(16) | 3.6(14)  | -7.9(13) | -4.2(14) |
| O4A  | 50(2)    | 25.4(19) | 25.9(18) | 5.0(14)  | 0.9(16)  | 0.7(16)  |
| N2A  | 48(3)    | 11.6(18) | 36(2)    | -4.4(17) | -2(2)    | 1.7(17)  |
| C1A  | 18.5(19) | 14(2)    | 25(2)    | -3.1(16) | 0.5(16)  | -0.8(15) |
| C2A  | 20(2)    | 46(3)    | 23(2)    | -3(2)    | -1.2(17) | -1.4(19) |
| C3A  | 13.8(19) | 73(4)    | 25(2)    | 3(3)     | 2.4(16)  | -1(2)    |
| C4A  | 25(2)    | 44(3)    | 20(2)    | -2(2)    | -7.9(17) | -2(2)    |
| C5A  | 13.4(18) | 42(3)    | 31(2)    | 3(2)     | 0.8(17)  | -3.6(18) |
| C6A  | 21(2)    | 29(3)    | 29(2)    | 3.2(19)  | 5.7(18)  | 0.3(18)  |
| C16A | 14.7(17) | 21(2)    | 34(2)    | 0(2)     | 5.0(16)  | -2.6(18) |
| C17A | 18.1(19) | 15(2)    | 25(2)    | 1.5(17)  | 2.4(16)  | -3.9(16) |
| C18A | 18.2(19) | 17(2)    | 25(2)    | -0.9(17) | -2.4(16) | 1.8(16)  |
| C19A | 15.7(18) | 21(2)    | 24(2)    | 3.8(17)  | -3.0(16) | 0.6(16)  |
| C20A | 26(2)    | 14(2)    | 37(3)    | -4.3(19) | 3.5(19)  | 2.0(17)  |
| C21A | 46(3)    | 22(2)    | 27(3)    | -8(2)    | 3(2)     | -4(2)    |
| C22A | 37(3)    | 24(2)    | 22(2)    | 2.6(19)  | 5.6(19)  | 2(2)     |
| C23A | 34(3)    | 18(2)    | 40(3)    | 5(2)     | -1(2)    | 3(2)     |
| C24A | 90(6)    | 20(3)    | 50(4)    | -12(3)   | 0(4)     | 3(3)     |

Table 4 Bond Lengths for **2n**.

| Atom | Atom | Length/Å | Atom | Atom | Length/Å  |
|------|------|----------|------|------|-----------|
| Br1  | C4   | 1.872(3) | O3A  | C11A | 1.427(5)  |
| S1   | N1   | 1.613(4) | O3A  | C16A | 1.354(6)  |
| S1   | O1   | 1.440(4) | N1A  | C7A  | 1.477(5)  |
| S1   | O2   | 1.423(4) | N1A  | C15A | 1.479(5)  |
| S1   | C1   | 1.742(3) | C7A  | C8B  | 1.516(8)  |
| O3   | C11  | 1.412(5) | C7A  | C8A  | 1.530(10) |
| O3   | C16  | 1.365(6) | C8B  | C9B  | 1.507(8)  |
| N1   | C7   | 1.488(6) | C8B  | C14B | 1.556(8)  |
| N1   | C15  | 1.499(6) | C9B  | C10B | 1.497(8)  |
| C7   | C8   | 1.528(6) | C10B | C11A | 1.339(8)  |
| C8   | C9   | 1.526(6) | C11A | C12B | 1.451(8)  |
| C8   | C14  | 1.541(6) | C11A | C10A | 1.334(10) |

|      |     |          |      |      |           |
|------|-----|----------|------|------|-----------|
| C9   | C10 | 1.498(6) | C11A | C12A | 1.447(10) |
| C10  | C11 | 1.341(6) | C12B | C13B | 1.329(8)  |
| C11  | C12 | 1.456(6) | C13B | C14B | 1.501(8)  |
| C12  | C13 | 1.338(6) | C14B | C15A | 1.552(8)  |
| C13  | C14 | 1.489(6) | C15A | C14A | 1.525(10) |
| C14  | C15 | 1.536(6) | O4A  | C16A | 1.205(6)  |
| O4   | C16 | 1.200(6) | N2A  | C20A | 1.379(5)  |
| N2   | C20 | 1.392(5) | N2A  | C23A | 1.449(7)  |
| N2   | C23 | 1.426(7) | N2A  | C24A | 1.452(7)  |
| N2   | C24 | 1.469(7) | C1A  | C2A  | 1.3900    |
| C1   | C2  | 1.3900   | C1A  | C6A  | 1.3900    |
| C1   | C6  | 1.3900   | C2A  | C3A  | 1.3900    |
| C2   | C3  | 1.3900   | C3A  | C4A  | 1.3900    |
| C3   | C4  | 1.3900   | C4A  | C5A  | 1.3900    |
| C4   | C5  | 1.3900   | C5A  | C6A  | 1.3900    |
| C5   | C6  | 1.3900   | C8A  | C9A  | 1.518(11) |
| C16  | C17 | 1.491(5) | C8A  | C14A | 1.550(10) |
| C17  | C18 | 1.3900   | C9A  | C10A | 1.501(11) |
| C17  | C22 | 1.3900   | C12A | C13A | 1.335(10) |
| C18  | C19 | 1.3900   | C13A | C14A | 1.501(10) |
| C19  | C20 | 1.3900   | C16A | C17A | 1.477(5)  |
| C20  | C21 | 1.3900   | C17A | C18A | 1.3900    |
| C21  | C22 | 1.3900   | C17A | C22A | 1.3900    |
| Br1A | C4A | 1.874(2) | C18A | C19A | 1.3900    |
| S1A  | N1A | 1.609(4) | C19A | C20A | 1.3900    |
| S1A  | O1A | 1.435(3) | C20A | C21A | 1.3900    |
| S1A  | O2A | 1.429(3) | C21A | C22A | 1.3900    |
| S1A  | C1A | 1.742(2) |      |      |           |

Table 5 Bond Angles for **2n**.

| Atom | Atom | Atom | Angle/°  | Atom | Atom | Atom | Angle/°  |
|------|------|------|----------|------|------|------|----------|
| N1   | S1   | C1   | 108.2(2) | C7A  | N1A  | C15A | 106.8(3) |
| O1   | S1   | N1   | 107.0(2) | C15A | N1A  | S1A  | 120.0(3) |
| O1   | S1   | C1   | 106.5(2) | N1A  | C7A  | C8B  | 105.1(4) |
| O2   | S1   | N1   | 107.5(2) | N1A  | C7A  | C8A  | 103.2(5) |
| O2   | S1   | O1   | 119.9(3) | C7A  | C8B  | C14B | 104.6(5) |

|     |     |     |            |      |      |      |            |
|-----|-----|-----|------------|------|------|------|------------|
| O2  | S1  | C1  | 107.3(2)   | C9B  | C8B  | C7A  | 111.9(6)   |
| C16 | O3  | C11 | 116.4(4)   | C9B  | C8B  | C14B | 116.4(7)   |
| C7  | N1  | S1  | 117.0(3)   | C10B | C9B  | C8B  | 114.3(6)   |
| C7  | N1  | C15 | 111.2(4)   | C11A | C10B | C9B  | 121.3(7)   |
| C15 | N1  | S1  | 119.8(3)   | O3A  | C11A | C12B | 112.1(5)   |
| N1  | C7  | C8  | 103.0(4)   | O3A  | C11A | C12A | 114.6(6)   |
| C7  | C8  | C14 | 102.0(3)   | C10B | C11A | O3A  | 121.1(5)   |
| C9  | C8  | C7  | 113.3(4)   | C10B | C11A | C12B | 126.6(6)   |
| C9  | C8  | C14 | 112.1(4)   | C10A | C11A | O3A  | 115.5(6)   |
| C10 | C9  | C8  | 112.2(4)   | C10A | C11A | C12A | 129.8(8)   |
| C11 | C10 | C9  | 123.5(4)   | C13B | C12B | C11A | 125.2(7)   |
| O3  | C11 | C12 | 114.4(4)   | C12B | C13B | C14B | 132.2(7)   |
| C10 | C11 | O3  | 116.8(4)   | C13B | C14B | C8B  | 118.6(6)   |
| C10 | C11 | C12 | 128.2(4)   | C13B | C14B | C15A | 108.3(5)   |
| C13 | C12 | C11 | 127.6(4)   | C15A | C14B | C8B  | 104.3(5)   |
| C12 | C13 | C14 | 131.2(4)   | N1A  | C15A | C14B | 98.8(4)    |
| C13 | C14 | C8  | 119.9(4)   | N1A  | C15A | C14A | 103.6(5)   |
| C13 | C14 | C15 | 112.3(4)   | C20A | N2A  | C23A | 121.2(4)   |
| C15 | C14 | C8  | 104.2(4)   | C20A | N2A  | C24A | 120.1(5)   |
| N1  | C15 | C14 | 102.9(3)   | C23A | N2A  | C24A | 118.3(4)   |
| C20 | N2  | C23 | 121.3(4)   | C2A  | C1A  | S1A  | 120.07(16) |
| C20 | N2  | C24 | 120.0(4)   | C2A  | C1A  | C6A  | 120.0      |
| C23 | N2  | C24 | 117.6(4)   | C6A  | C1A  | S1A  | 119.93(16) |
| C2  | C1  | S1  | 118.98(19) | C3A  | C2A  | C1A  | 120.0      |
| C2  | C1  | C6  | 120.0      | C2A  | C3A  | C4A  | 120.0      |
| C6  | C1  | S1  | 120.99(19) | C3A  | C4A  | Br1A | 118.88(15) |
| C1  | C2  | C3  | 120.0      | C5A  | C4A  | Br1A | 121.12(15) |
| C4  | C3  | C2  | 120.0      | C5A  | C4A  | C3A  | 120.0      |
| C3  | C4  | Br1 | 119.93(19) | C4A  | C5A  | C6A  | 120.0      |
| C3  | C4  | C5  | 120.0      | C5A  | C6A  | C1A  | 120.0      |
| C5  | C4  | Br1 | 120.06(19) | C7A  | C8A  | C14A | 105.7(7)   |
| C6  | C5  | C4  | 120.0      | C9A  | C8A  | C7A  | 111.2(9)   |
| C5  | C6  | C1  | 120.0      | C9A  | C8A  | C14A | 112.6(10)  |
| O3  | C16 | C17 | 112.5(4)   | C10A | C9A  | C8A  | 113.2(10)  |
| O4  | C16 | O3  | 122.4(4)   | C11A | C10A | C9A  | 119.4(10)  |
| O4  | C16 | C17 | 125.1(4)   | C13A | C12A | C11A | 120.7(10)  |
| C18 | C17 | C16 | 122.4(3)   | C12A | C13A | C14A | 131.5(10)  |

|      |     |      |            |      |      |      |           |
|------|-----|------|------------|------|------|------|-----------|
| C18  | C17 | C22  | 120.0      | C15A | C14A | C8A  | 105.5(7)  |
| C22  | C17 | C16  | 117.6(3)   | C13A | C14A | C15A | 110.5(8)  |
| C17  | C18 | C19  | 120.0      | C13A | C14A | C8A  | 121.6(10) |
| C20  | C19 | C18  | 120.0      | O3A  | C16A | C17A | 112.0(4)  |
| C19  | C20 | N2   | 118.5(3)   | O4A  | C16A | O3A  | 122.2(5)  |
| C21  | C20 | N2   | 121.3(3)   | O4A  | C16A | C17A | 125.8(4)  |
| C21  | C20 | C19  | 120.0      | C18A | C17A | C16A | 123.0(3)  |
| C20  | C21 | C22  | 120.0      | C18A | C17A | C22A | 120.0     |
| C21  | C22 | C17  | 120.0      | C22A | C17A | C16A | 117.0(3)  |
| N1A  | S1A | C1A  | 106.79(19) | C17A | C18A | C19A | 120.0     |
| O1A  | S1A | N1A  | 107.3(2)   | C18A | C19A | C20A | 120.0     |
| O1A  | S1A | C1A  | 107.56(18) | N2A  | C20A | C19A | 120.3(3)  |
| O2A  | S1A | N1A  | 107.3(2)   | N2A  | C20A | C21A | 119.6(3)  |
| O2A  | S1A | O1A  | 120.4(2)   | C21A | C20A | C19A | 120.0     |
| O2A  | S1A | C1A  | 106.84(17) | C22A | C21A | C20A | 120.0     |
| C16A | O3A | C11A | 114.5(4)   | C21A | C22A | C17A | 120.0     |
| C7A  | N1A | S1A  | 118.0(3)   |      |      |      |           |

Table 6 Torsion Angles for **2n**.

| A   | B   | C   | D   | Angle/°   | A   | B    | C    | D    | Angle/°    |
|-----|-----|-----|-----|-----------|-----|------|------|------|------------|
| Br1 | C4  | C5  | C6  | -178.8(3) | C7A | N1A  | C15A | C14B | -45.4(5)   |
| S1  | N1  | C7  | C8  | -163.1(3) | C7A | N1A  | C15A | C14A | -38.2(7)   |
| S1  | N1  | C15 | C14 | 136.8(4)  | C7A | C8B  | C9B  | C10B | -168.6(6)  |
| S1  | C1  | C2  | C3  | 178.3(3)  | C7A | C8B  | C14B | C13B | -140.1(7)  |
| S1  | C1  | C6  | C5  | -178.3(3) | C7A | C8B  | C14B | C15A | -19.6(9)   |
| O3  | C11 | C12 | C13 | -167.0(5) | C7A | C8A  | C9A  | C10A | -173.7(10) |
| O3  | C16 | C17 | C18 | -4.2(5)   | C7A | C8A  | C14A | C15A | 0.5(14)    |
| O3  | C16 | C17 | C22 | 173.2(3)  | C7A | C8A  | C14A | C13A | -126.3(12) |
| N1  | S1  | C1  | C2  | 86.6(3)   | C8B | C7A  | C8A  | C9A  | -28(8)     |
| N1  | S1  | C1  | C6  | -95.1(3)  | C8B | C7A  | C8A  | C14A | 94(9)      |
| N1  | C7  | C8  | C9  | -84.0(5)  | C8B | C9B  | C10B | C11A | -62.5(10)  |
| N1  | C7  | C8  | C14 | 36.7(5)   | C8B | C14B | C15A | N1A  | 38.8(7)    |
| C7  | N1  | C15 | C14 | -4.8(6)   | C8B | C14B | C15A | C14A | -86(4)     |
| C7  | C8  | C9  | C10 | -163.3(4) | C9B | C8B  | C14B | C13B | -16.2(11)  |
| C7  | C8  | C14 | C13 | -167.2(5) | C9B | C8B  | C14B | C15A | 104.4(8)   |
| C7  | C8  | C14 | C15 | -40.6(5)  | C9B | C10B | C11A | O3A  | -178.2(6)  |

|     |     |     |     |           |      |      |      |      |            |
|-----|-----|-----|-----|-----------|------|------|------|------|------------|
| C8  | C9  | C10 | C11 | -55.3(7)  | C9B  | C10B | C11A | C12B | -3.9(11)   |
| C8  | C14 | C15 | N1  | 27.9(5)   | C9B  | C10B | C11A | C10A | 107(3)     |
| C9  | C8  | C14 | C13 | -45.7(6)  | C9B  | C10B | C11A | C12A | -20.9(11)  |
| C9  | C8  | C14 | C15 | 80.9(5)   | C10B | C11A | C12B | C13B | 35.5(12)   |
| C9  | C10 | C11 | O3  | -173.8(5) | C10B | C11A | C10A | C9A  | -59(2)     |
| C9  | C10 | C11 | C12 | -3.4(9)   | C10B | C11A | C12A | C13A | 48.7(17)   |
| C10 | C11 | C12 | C13 | 22.5(9)   | C11A | O3A  | C16A | O4A  | 1.7(6)     |
| C11 | O3  | C16 | O4  | 3.1(6)    | C11A | O3A  | C16A | C17A | -176.9(3)  |
| C11 | O3  | C16 | C17 | -177.4(3) | C11A | C12B | C13B | C14B | 2.8(15)    |
| C11 | C12 | C13 | C14 | 4.2(10)   | C11A | C12A | C13A | C14A | 8(2)       |
| C12 | C13 | C14 | C8  | -1.9(9)   | C12B | C11A | C10A | C9A  | 23.0(18)   |
| C12 | C13 | C14 | C15 | -124.6(6) | C12B | C11A | C12A | C13A | -69(2)     |
| C13 | C14 | C15 | N1  | 159.2(4)  | C12B | C13B | C14B | C8B  | -26.4(14)  |
| C14 | C8  | C9  | C10 | 81.9(5)   | C12B | C13B | C14B | C15A | -144.9(10) |
| C15 | N1  | C7  | C8  | -20.4(6)  | C13B | C14B | C15A | N1A  | 166.0(6)   |
| O1  | S1  | N1  | C7  | -48.0(4)  | C13B | C14B | C15A | C14A | 41(4)      |
| O1  | S1  | N1  | C15 | 172.6(4)  | C14B | C8B  | C9B  | C10B | 71.3(9)    |
| O1  | S1  | C1  | C2  | -158.7(3) | C14B | C15A | C14A | C8A  | 79(4)      |
| O1  | S1  | C1  | C6  | 19.6(3)   | C14B | C15A | C14A | C13A | -148(5)    |
| O2  | S1  | N1  | C7  | -178.0(4) | C15A | N1A  | C7A  | C8B  | 34.4(6)    |
| O2  | S1  | N1  | C15 | 42.6(5)   | C15A | N1A  | C7A  | C8A  | 38.3(8)    |
| O2  | S1  | C1  | C2  | -29.1(3)  | O1A  | S1A  | N1A  | C7A  | -178.2(3)  |
| O2  | S1  | C1  | C6  | 149.2(3)  | O1A  | S1A  | N1A  | C15A | -44.9(4)   |
| O4  | C16 | C17 | C18 | 175.3(4)  | O1A  | S1A  | C1A  | C2A  | -151.8(2)  |
| O4  | C16 | C17 | C22 | -7.3(6)   | O1A  | S1A  | C1A  | C6A  | 28.1(3)    |
| N2  | C20 | C21 | C22 | 175.0(4)  | O2A  | S1A  | N1A  | C7A  | 51.1(4)    |
| C1  | S1  | N1  | C7  | 66.4(4)   | O2A  | S1A  | N1A  | C15A | -175.6(3)  |
| C1  | S1  | N1  | C15 | -73.0(4)  | O2A  | S1A  | C1A  | C2A  | -21.3(3)   |
| C1  | C2  | C3  | C4  | 0.0       | O2A  | S1A  | C1A  | C6A  | 158.6(2)   |
| C2  | C1  | C6  | C5  | 0.0       | O4A  | C16A | C17A | C18A | 169.6(4)   |
| C2  | C3  | C4  | Br1 | 178.8(3)  | O4A  | C16A | C17A | C22A | -7.8(5)    |
| C2  | C3  | C4  | C5  | 0.0       | N2A  | C20A | C21A | C22A | -176.7(4)  |
| C3  | C4  | C5  | C6  | 0.0       | C1A  | S1A  | N1A  | C7A  | -63.1(4)   |
| C4  | C5  | C6  | C1  | 0.0       | C1A  | S1A  | N1A  | C15A | 70.2(4)    |
| C6  | C1  | C2  | C3  | 0.0       | C1A  | C2A  | C3A  | C4A  | 0.0        |
| C16 | O3  | C11 | C10 | -122.0(5) | C2A  | C1A  | C6A  | C5A  | 0.0        |
| C16 | O3  | C11 | C12 | 66.4(5)   | C2A  | C3A  | C4A  | Br1A | -179.7(3)  |

|      |      |      |      |            |      |      |      |      |            |
|------|------|------|------|------------|------|------|------|------|------------|
| C16  | C17  | C18  | C19  | 177.4(3)   | C2A  | C3A  | C4A  | C5A  | 0.0        |
| C16  | C17  | C22  | C21  | -177.5(3)  | C3A  | C4A  | C5A  | C6A  | 0.0        |
| C17  | C18  | C19  | C20  | 0.0        | C4A  | C5A  | C6A  | C1A  | 0.0        |
| C18  | C17  | C22  | C21  | 0.0        | C6A  | C1A  | C2A  | C3A  | 0.0        |
| C18  | C19  | C20  | N2   | -175.1(4)  | C8A  | C7A  | C8B  | C9B  | 162(9)     |
| C18  | C19  | C20  | C21  | 0.0        | C8A  | C7A  | C8B  | C14B | -72(8)     |
| C19  | C20  | C21  | C22  | 0.0        | C8A  | C9A  | C10A | C11A | -71.4(16)  |
| C20  | C21  | C22  | C17  | 0.0        | C9A  | C8A  | C14A | C15A | 122.1(12)  |
| C22  | C17  | C18  | C19  | 0.0        | C9A  | C8A  | C14A | C13A | -4.7(17)   |
| C23  | N2   | C20  | C19  | -13.8(6)   | C10A | C11A | C12B | C13B | 14.8(15)   |
| C23  | N2   | C20  | C21  | 171.2(4)   | C10A | C11A | C12A | C13A | 32(2)      |
| C24  | N2   | C20  | C19  | 178.9(4)   | C12A | C11A | C12B | C13B | 108(3)     |
| C24  | N2   | C20  | C21  | 3.8(6)     | C12A | C11A | C10A | C9A  | 3.0(18)    |
| Br1A | C4A  | C5A  | C6A  | 179.7(3)   | C12A | C13A | C14A | C15A | -163.1(16) |
| S1A  | N1A  | C7A  | C8B  | 173.2(5)   | C12A | C13A | C14A | C8A  | -39(2)     |
| S1A  | N1A  | C7A  | C8A  | 177.1(7)   | C14A | C8A  | C9A  | C10A | 67.9(14)   |
| S1A  | N1A  | C15A | C14B | 176.7(4)   | C16A | O3A  | C11A | C10B | 79.0(7)    |
| S1A  | N1A  | C15A | C14A | -176.0(7)  | C16A | O3A  | C11A | C12B | -96.1(6)   |
| S1A  | C1A  | C2A  | C3A  | 179.9(2)   | C16A | O3A  | C11A | C10A | 96.8(10)   |
| S1A  | C1A  | C6A  | C5A  | -179.9(2)  | C16A | O3A  | C11A | C12A | -79.7(10)  |
| O3A  | C11A | C12B | C13B | -149.8(7)  | C16A | C17A | C18A | C19A | -177.4(3)  |
| O3A  | C11A | C10A | C9A  | -172.8(9)  | C16A | C17A | C22A | C21A | 177.5(3)   |
| O3A  | C11A | C12A | C13A | -152.6(12) | C17A | C18A | C19A | C20A | 0.0        |
| O3A  | C16A | C17A | C18A | -11.7(4)   | C18A | C17A | C22A | C21A | 0.0        |
| O3A  | C16A | C17A | C22A | 170.8(3)   | C18A | C19A | C20A | N2A  | 176.7(4)   |
| N1A  | S1A  | C1A  | C2A  | 93.3(2)    | C18A | C19A | C20A | C21A | 0.0        |
| N1A  | S1A  | C1A  | C6A  | -86.8(2)   | C19A | C20A | C21A | C22A | 0.0        |
| N1A  | C7A  | C8B  | C9B  | -134.6(6)  | C20A | C21A | C22A | C17A | 0.0        |
| N1A  | C7A  | C8B  | C14B | -7.7(8)    | C22A | C17A | C18A | C19A | 0.0        |
| N1A  | C7A  | C8A  | C9A  | -145.5(10) | C23A | N2A  | C20A | C19A | -6.0(6)    |
| N1A  | C7A  | C8A  | C14A | -22.9(12)  | C23A | N2A  | C20A | C21A | 170.7(4)   |
| N1A  | C15A | C14A | C8A  | 22.1(12)   | C24A | N2A  | C20A | C19A | 167.1(5)   |
| N1A  | C15A | C14A | C13A | 155.4(10)  | C24A | N2A  | C20A | C21A | -16.2(7)   |

Table 7 Hydrogen Atom Coordinates ( $\text{\AA} \times 10^4$ ) and Isotropic Displacement Parameters ( $\text{\AA}^2 \times 10^3$ ) for **2n**.

| Atom | <i>x</i> | <i>y</i> | <i>z</i> | U(eq)  |
|------|----------|----------|----------|--------|
| H7A  | 5599     | 6734     | 6888     | 42     |
| H7B  | 4912     | 6831     | 6400     | 42     |
| H8   | 4757     | 5637     | 6461     | 32     |
| H9A  | 5491     | 5670     | 7256     | 36     |
| H9B  | 3840     | 5687     | 7327     | 36     |
| H10  | 5286     | 4484     | 7196     | 35     |
| H12  | 1264     | 4363     | 6716     | 32     |
| H13  | 784      | 5425     | 6521     | 33     |
| H14  | 2607     | 6092     | 6243     | 32     |
| H15E | 1436     | 6851     | 6646     | 34     |
| H15F | 1872     | 6454     | 7097     | 34     |
| H2   | 1003     | 7935     | 6225     | 42     |
| H3   | 583      | 8176     | 5483     | 51     |
| H5   | 4778     | 8410     | 5371     | 70     |
| H6   | 5198     | 8169     | 6112     | 52     |
| H18  | 3675     | 2499     | 7261     | 26     |
| H19  | 3553     | 1277     | 7326     | 26     |
| H21  | 2803     | 1110     | 6021     | 34     |
| H22  | 2925     | 2331     | 5956     | 32     |
| H23D | 4360     | 125      | 7224     | 50     |
| H23E | 3245     | -485     | 7105     | 50     |
| H23F | 2771     | 199      | 7359     | 50     |
| H24D | 1939     | 120      | 6161     | 63     |
| H24E | 2392     | -556     | 6445     | 63     |
| H24F | 3544     | -139     | 6191     | 63     |
| H7AC | 4808     | 2348     | 8606     | 28     |
| H7AD | 3700     | 2287     | 8189     | 28     |
| H7AA | 4848     | 2379     | 8607     | 28     |
| H7AB | 3700     | 2269     | 8204     | 28     |
| H8B  | 4138     | 3352     | 7974     | 35     |
| H9BA | 4120     | 3533     | 8744     | 35     |
| H9BB | 5803     | 3547     | 8766     | 35     |
| H10B | 4134     | 4695     | 8564     | 35     |
| H12B | 8076     | 4690     | 8181     | 35     |
| H13B | 8300     | 3623     | 7968     | 35     |
| H14B | 6026     | 3179     | 7612     | 30(20) |



|      |      |      |      |    |
|------|------|------|------|----|
| H15C | 7649 | 2312 | 7839 | 29 |
| H15D | 7507 | 2487 | 8348 | 29 |
| H15A | 7589 | 2339 | 7817 | 29 |
| H15B | 7569 | 2426 | 8336 | 29 |
| H2A  | 4439 | 996  | 8908 | 35 |
| H3A  | 5182 | 856  | 9642 | 44 |
| H5A  | 9249 | 1033 | 9340 | 35 |
| H6A  | 8506 | 1173 | 8606 | 32 |
| H8A  | 4224 | 3295 | 7890 | 35 |
| H9AA | 3731 | 3605 | 8622 | 35 |
| H9AB | 5389 | 3620 | 8749 | 35 |
| H10A | 3880 | 4726 | 8342 | 35 |
| H12A | 8146 | 4689 | 8361 | 35 |
| H13A | 8404 | 3565 | 8226 | 35 |
| H14A | 6332 | 3297 | 7675 | 35 |
| H18A | 5867 | 6580 | 7800 | 24 |
| H19A | 5801 | 7794 | 7684 | 24 |
| H21A | 6506 | 8120 | 8979 | 38 |
| H22A | 6572 | 6906 | 9095 | 33 |
| H23A | 6836 | 8824 | 7650 | 46 |
| H23B | 6412 | 9574 | 7835 | 46 |
| H23C | 5211 | 9026 | 7676 | 46 |
| H24A | 5316 | 9116 | 8792 | 80 |
| H24B | 5892 | 9740 | 8505 | 80 |
| H24C | 6973 | 9263 | 8795 | 80 |

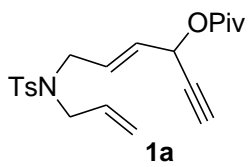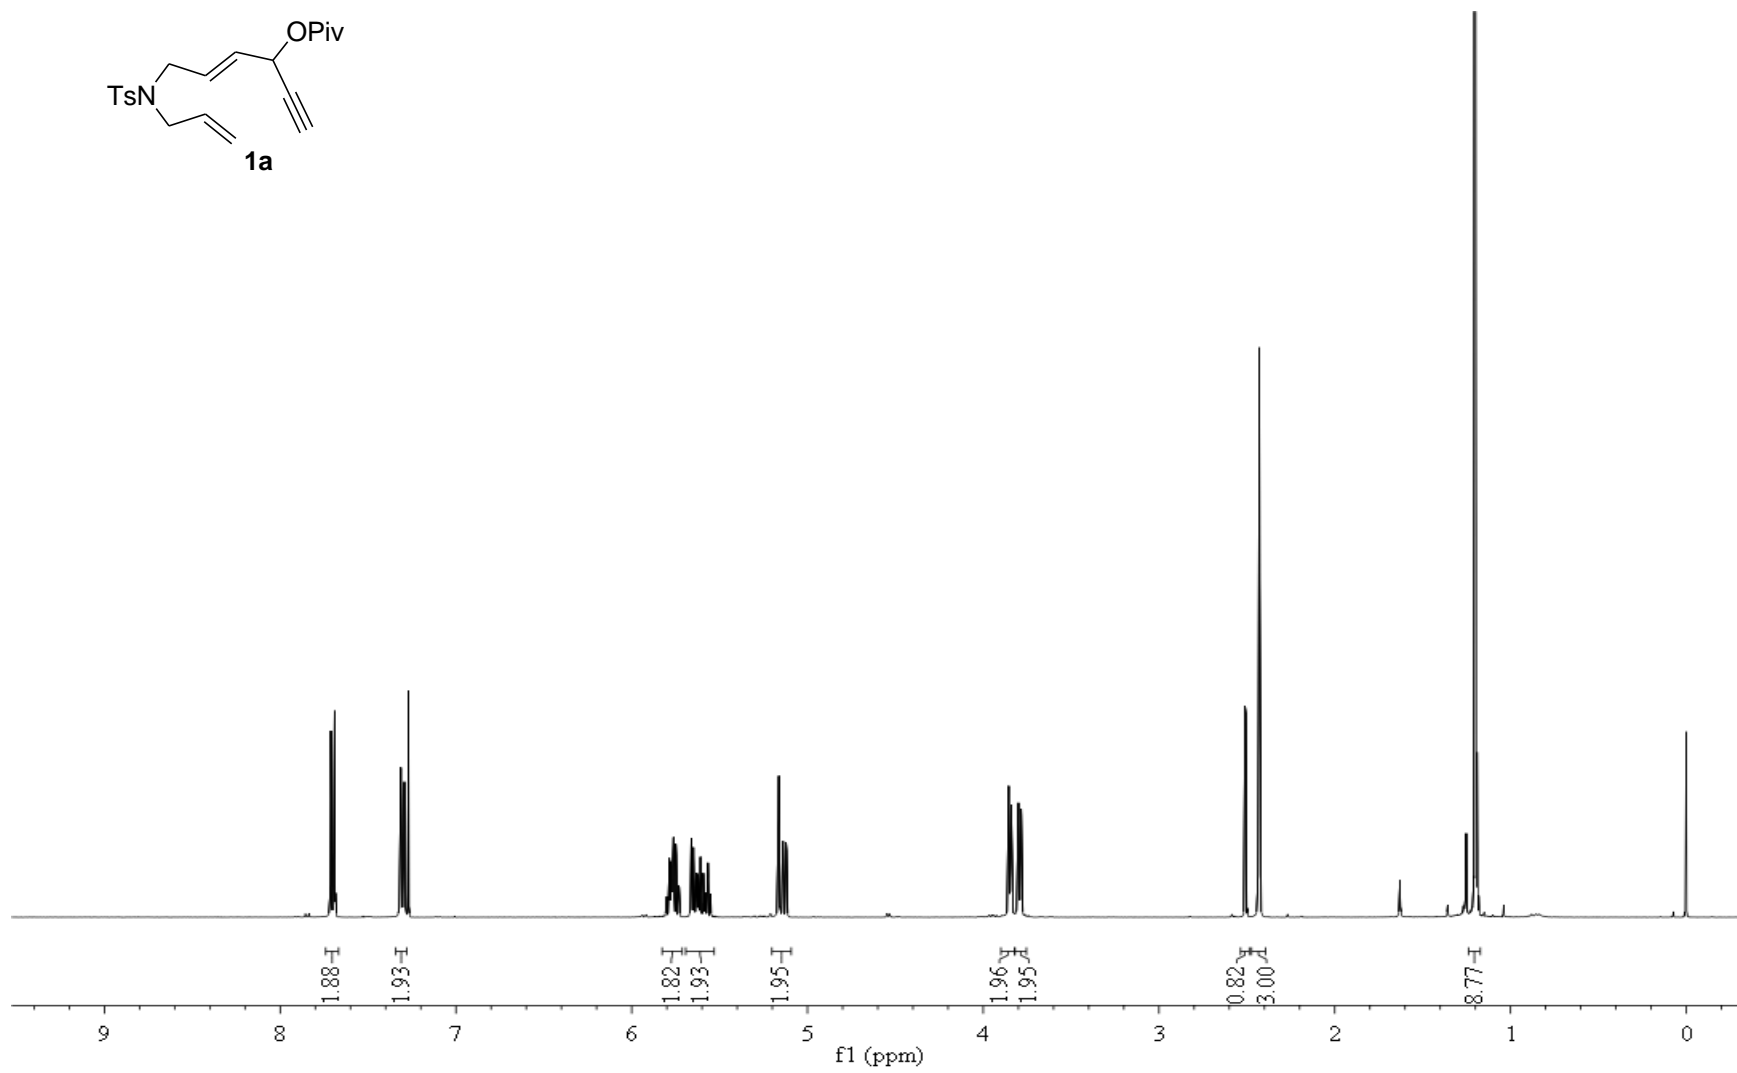

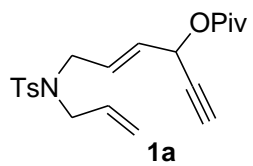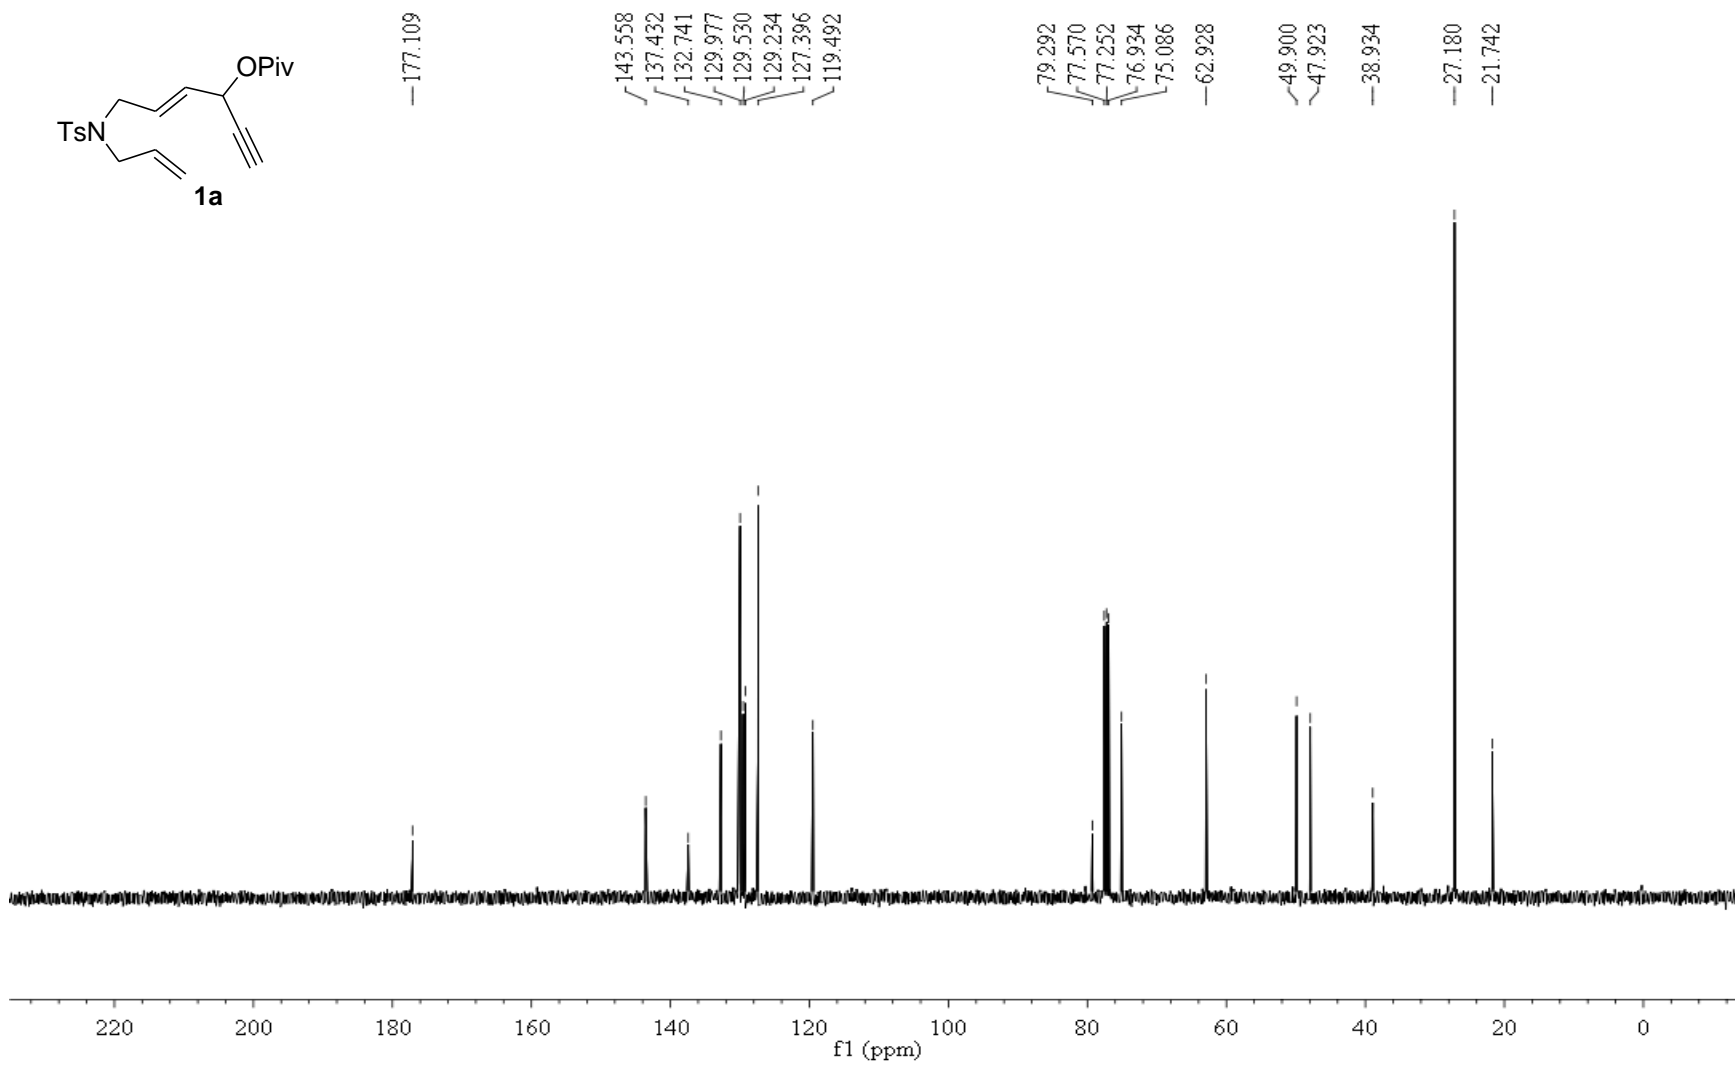

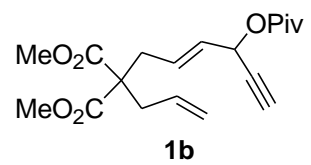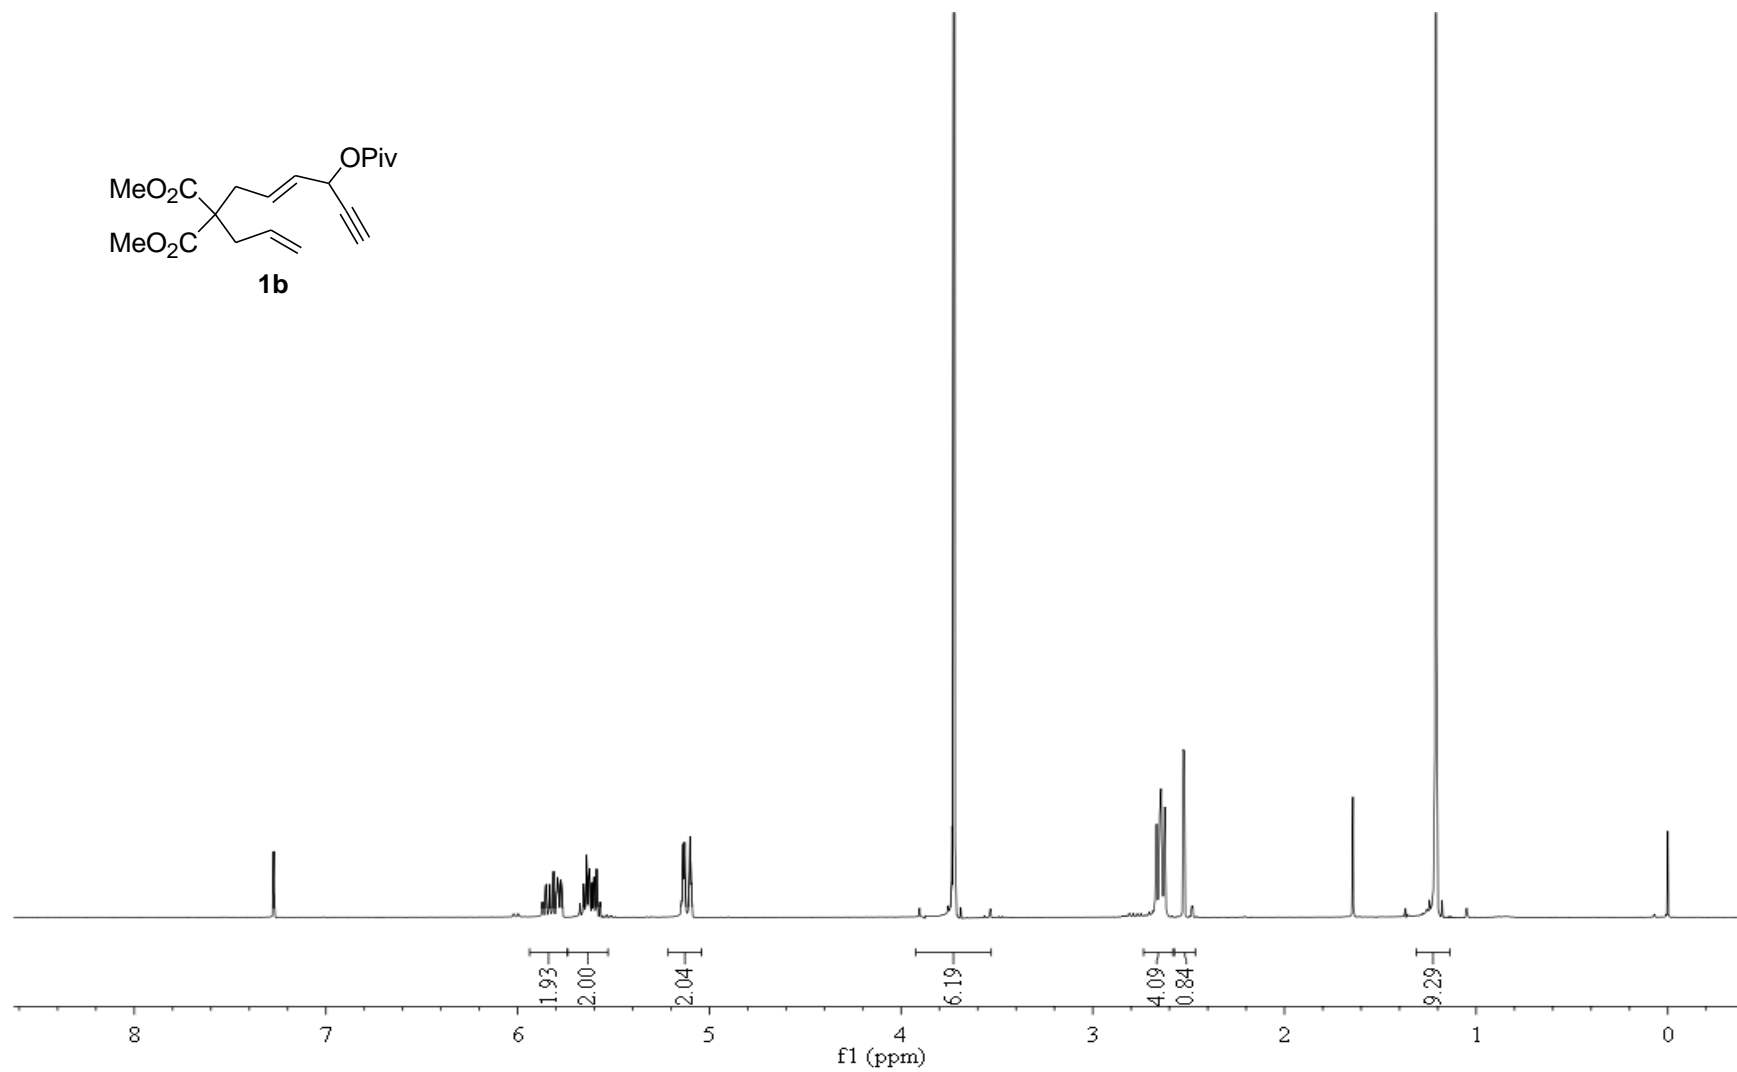

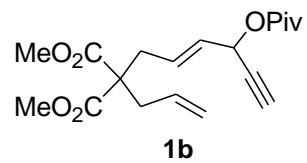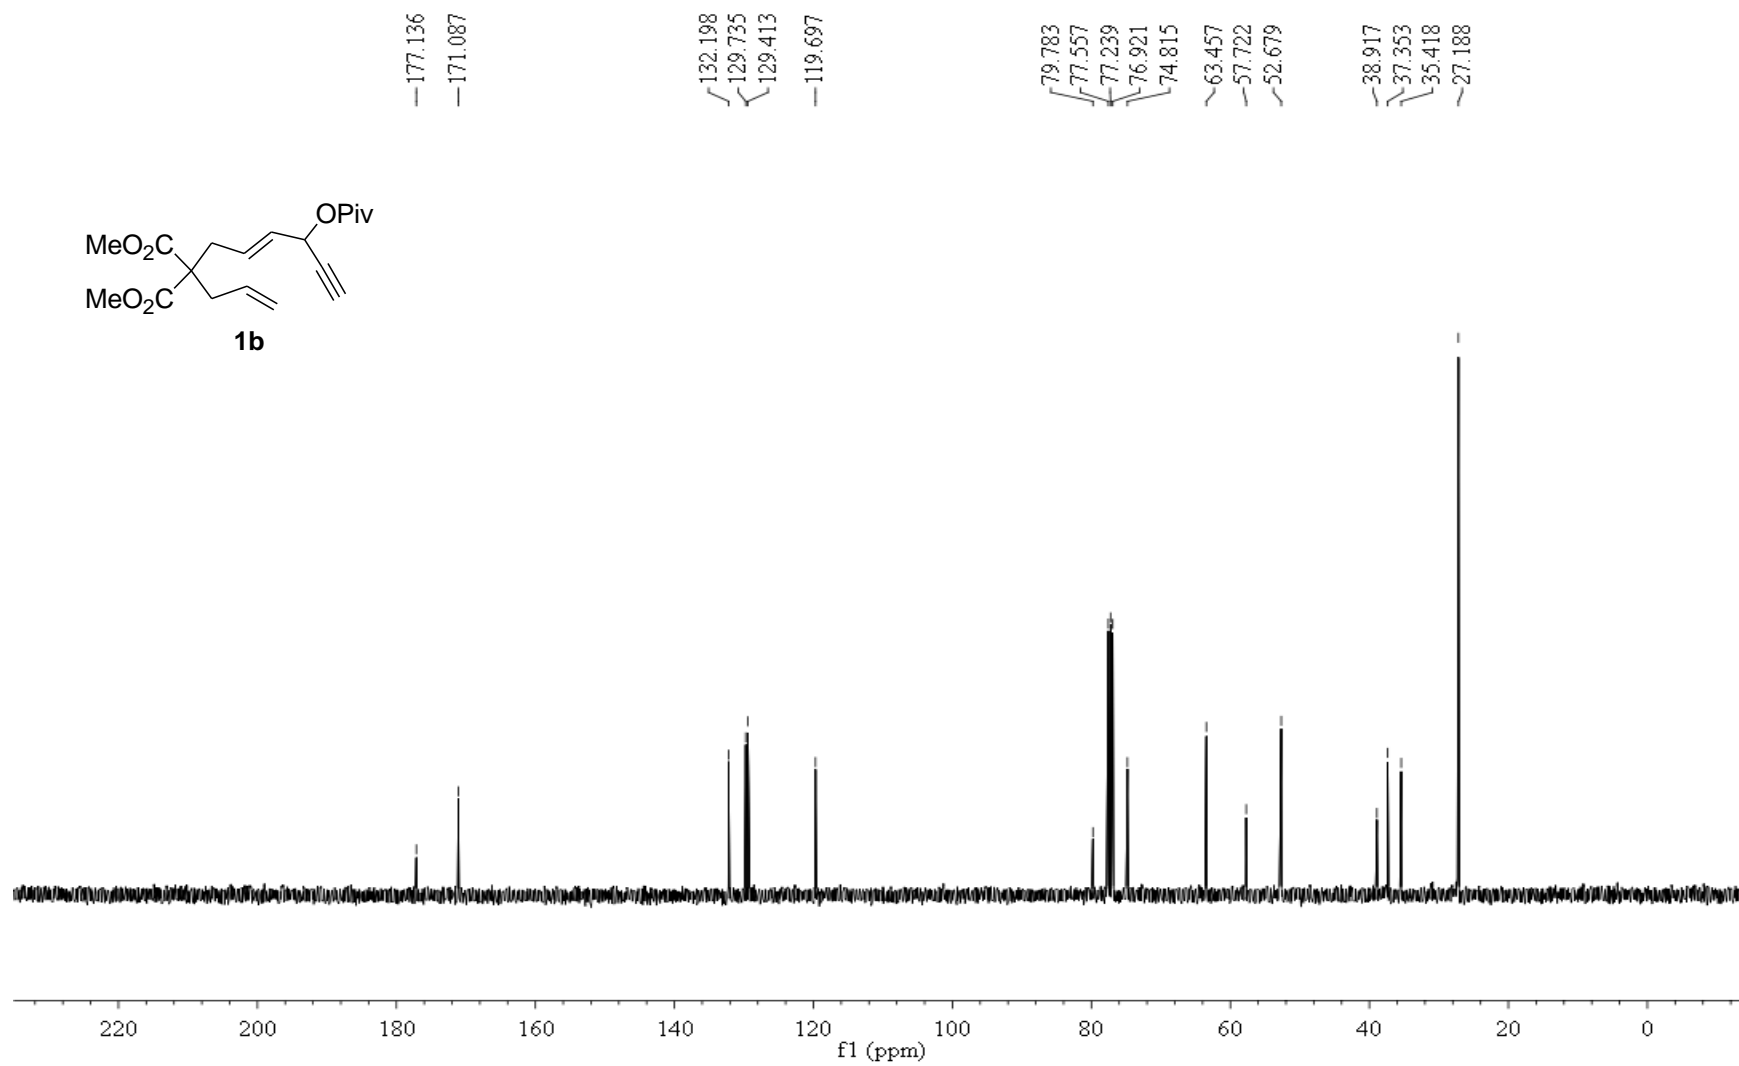

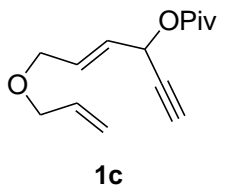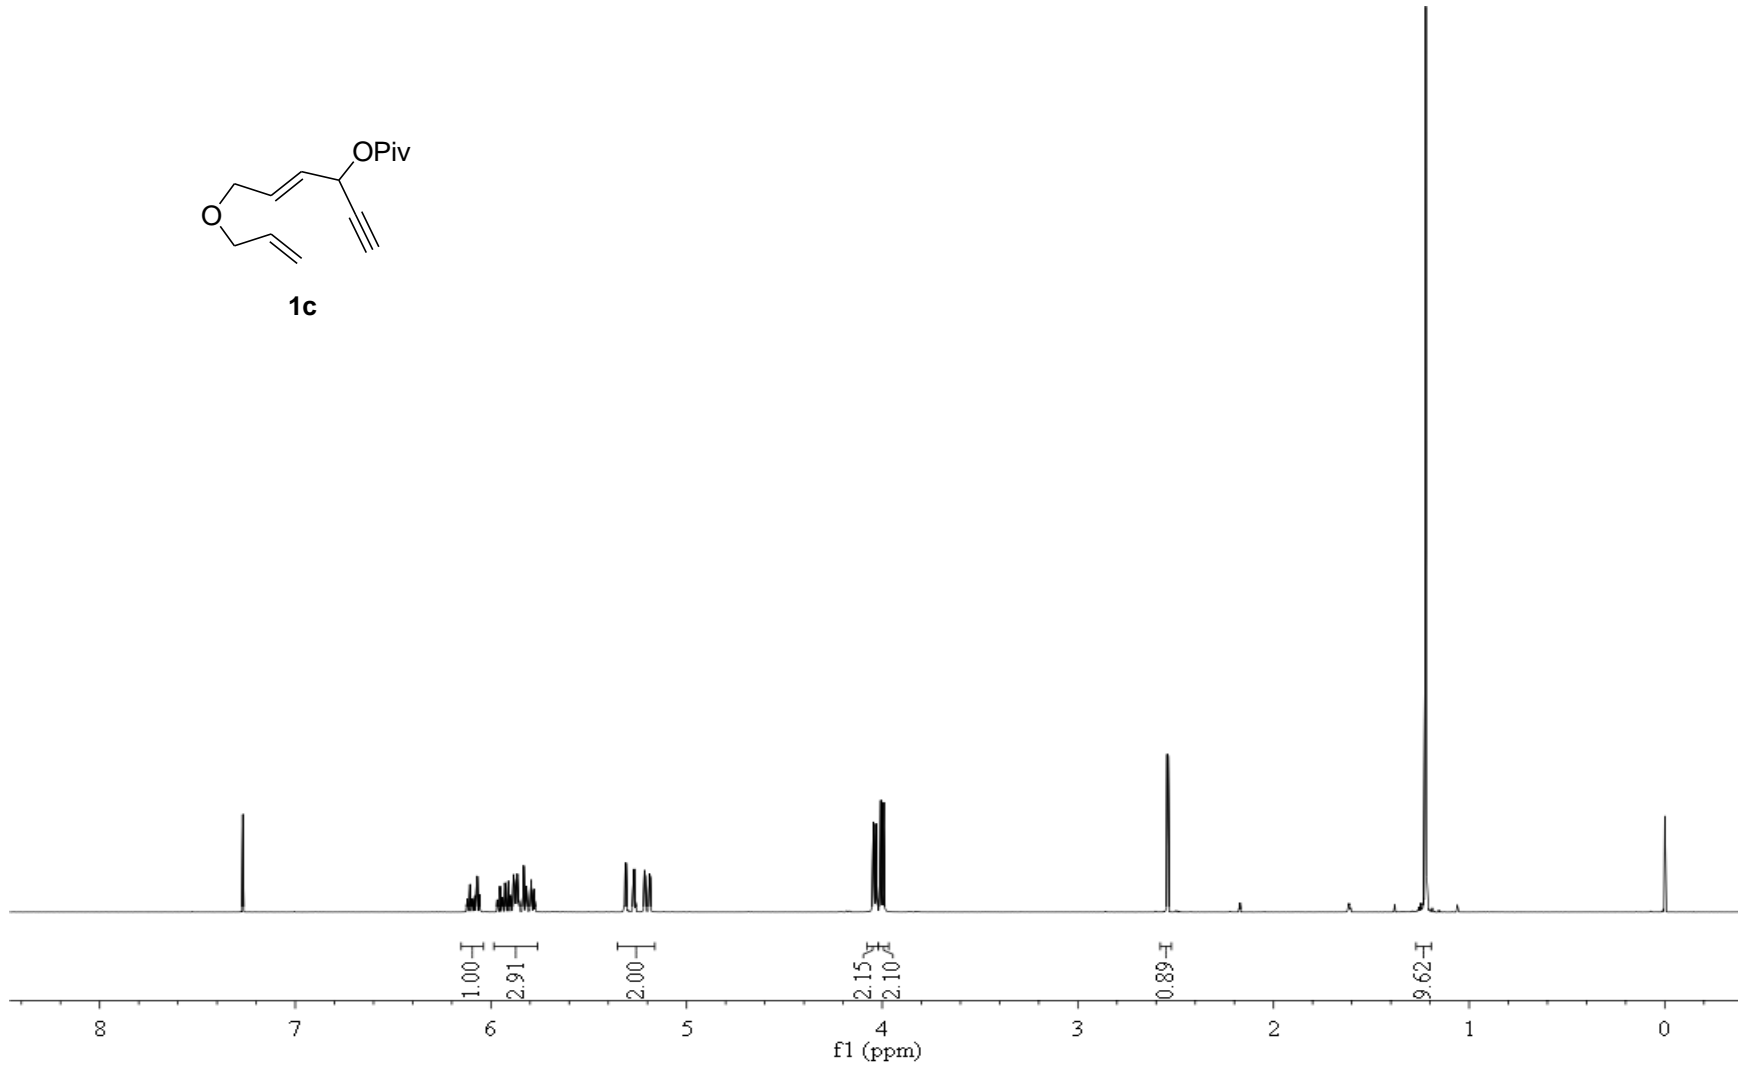

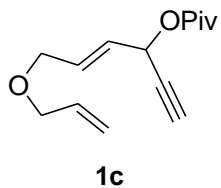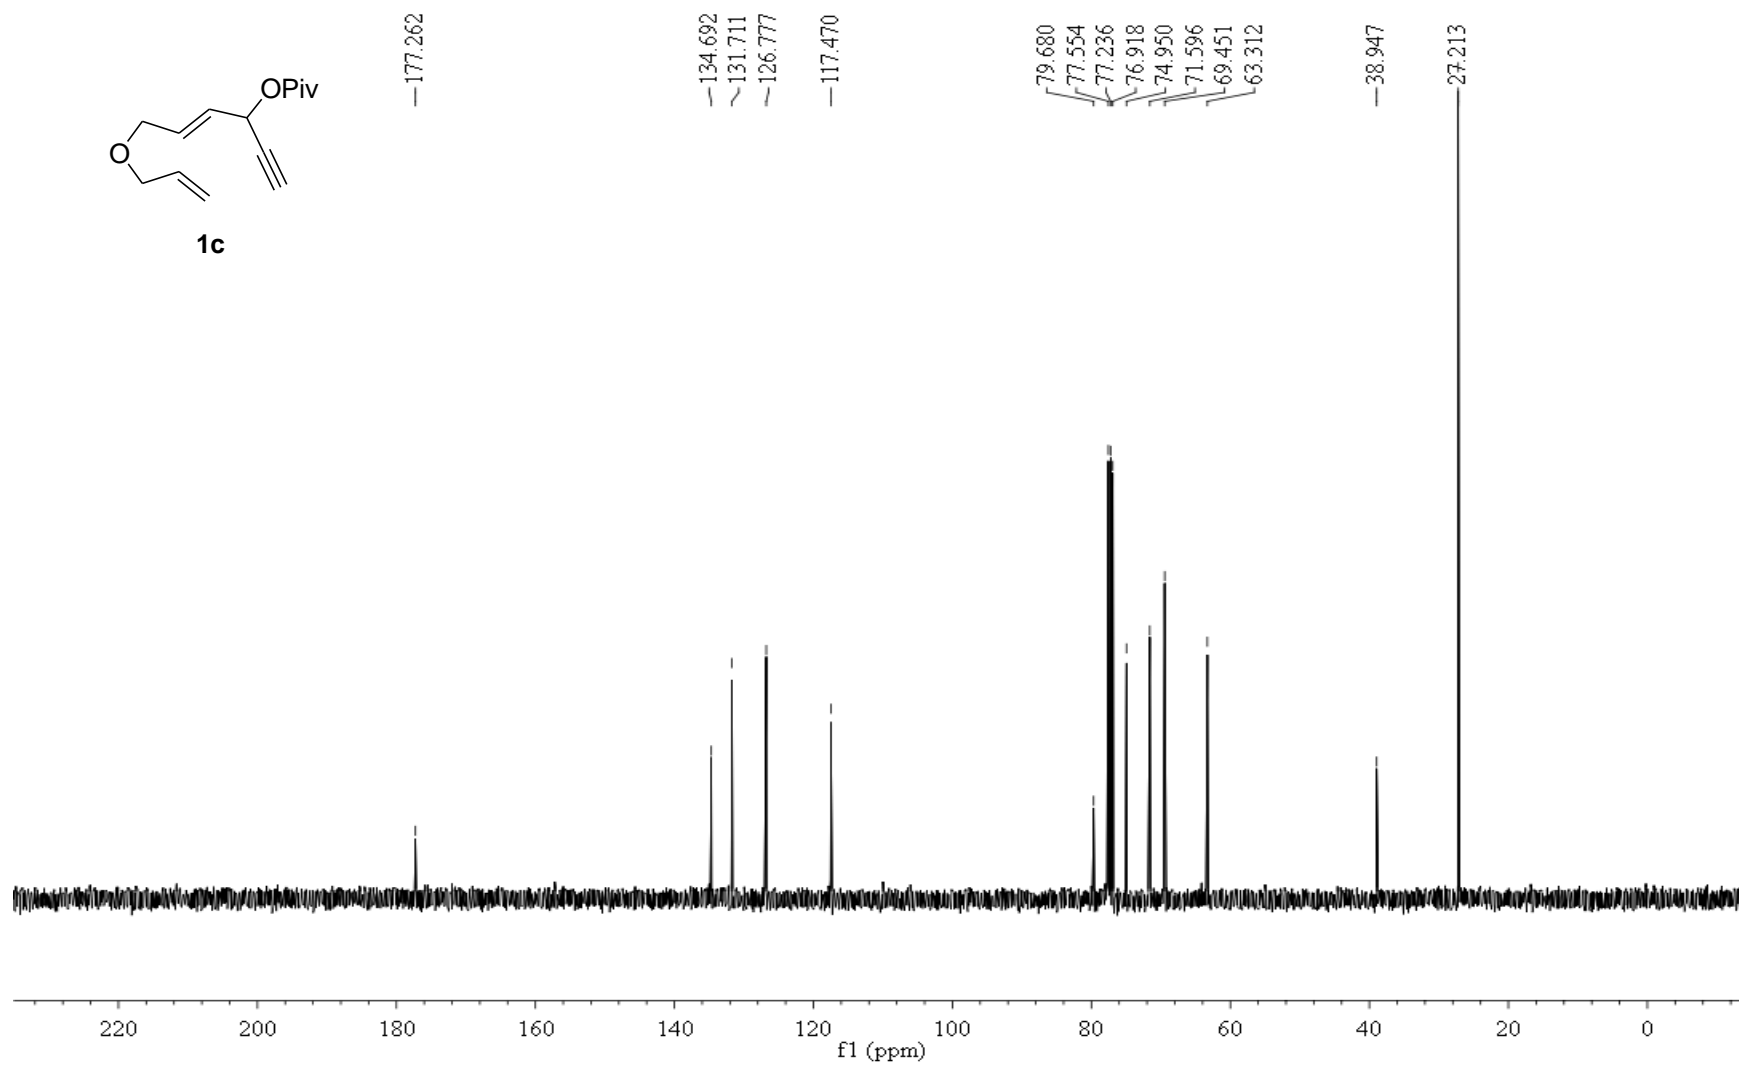

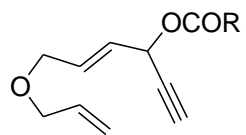

**1d** (R = *p*-Me<sub>2</sub>NC<sub>6</sub>H<sub>4</sub>)

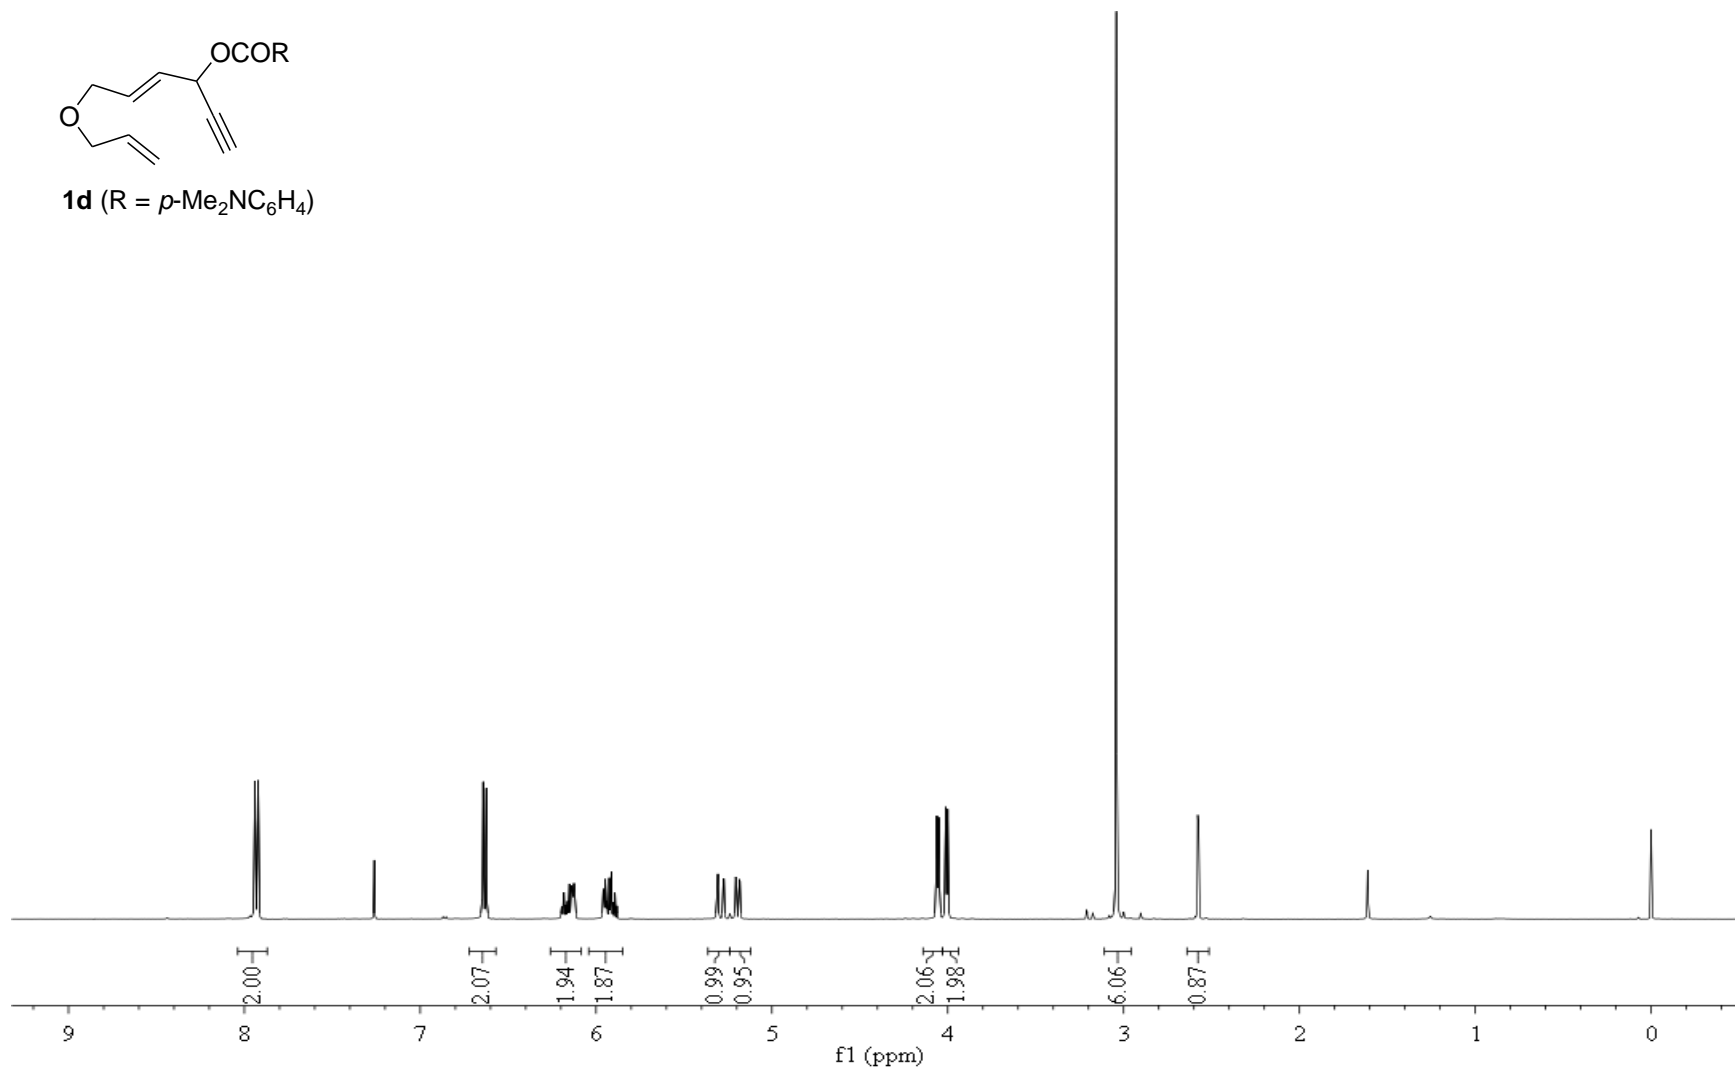



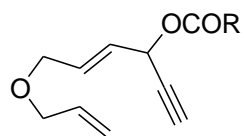

**1d** (R = *p*-Me<sub>2</sub>NC<sub>6</sub>H<sub>4</sub>)

—165.798  
—153.811  
134.787  
131.907  
131.603  
127.371  
117.517  
116.378  
110.920  
80.193  
77.558  
77.303  
77.049  
75.044  
71.670  
69.616  
63.170  
—40.319

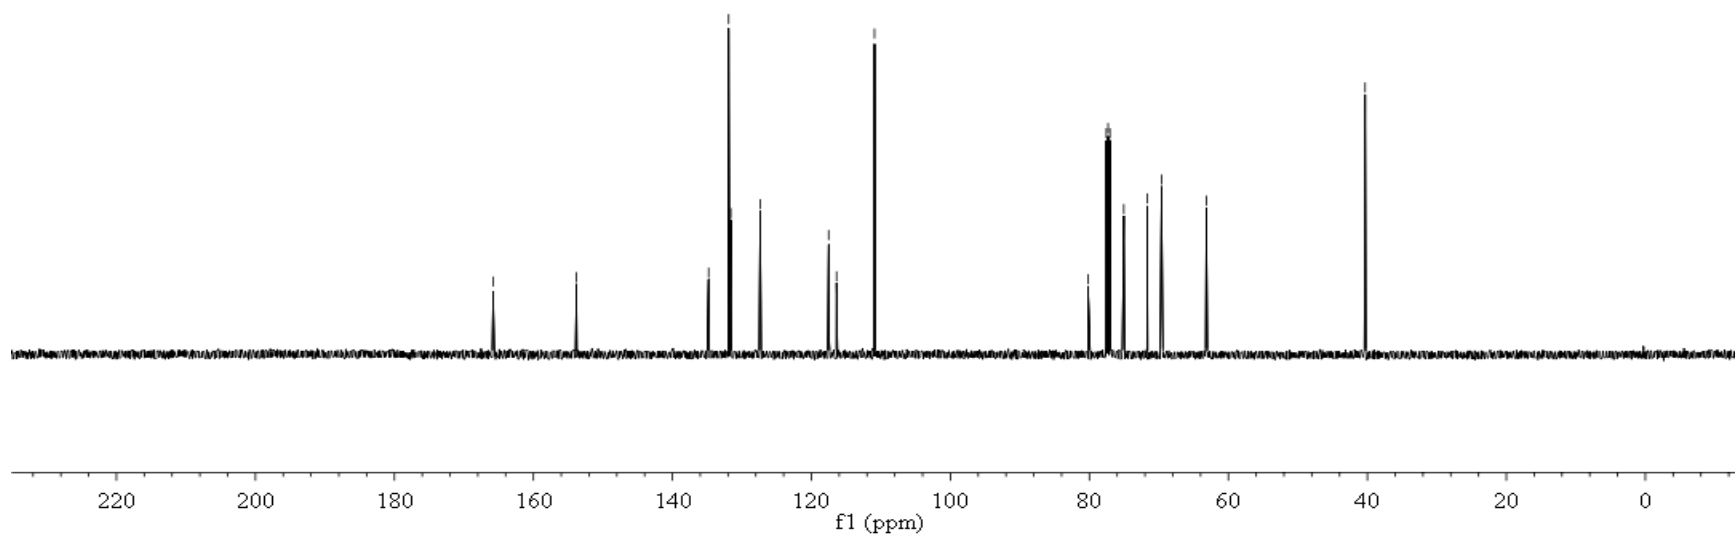

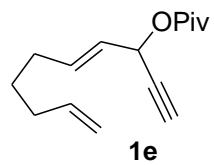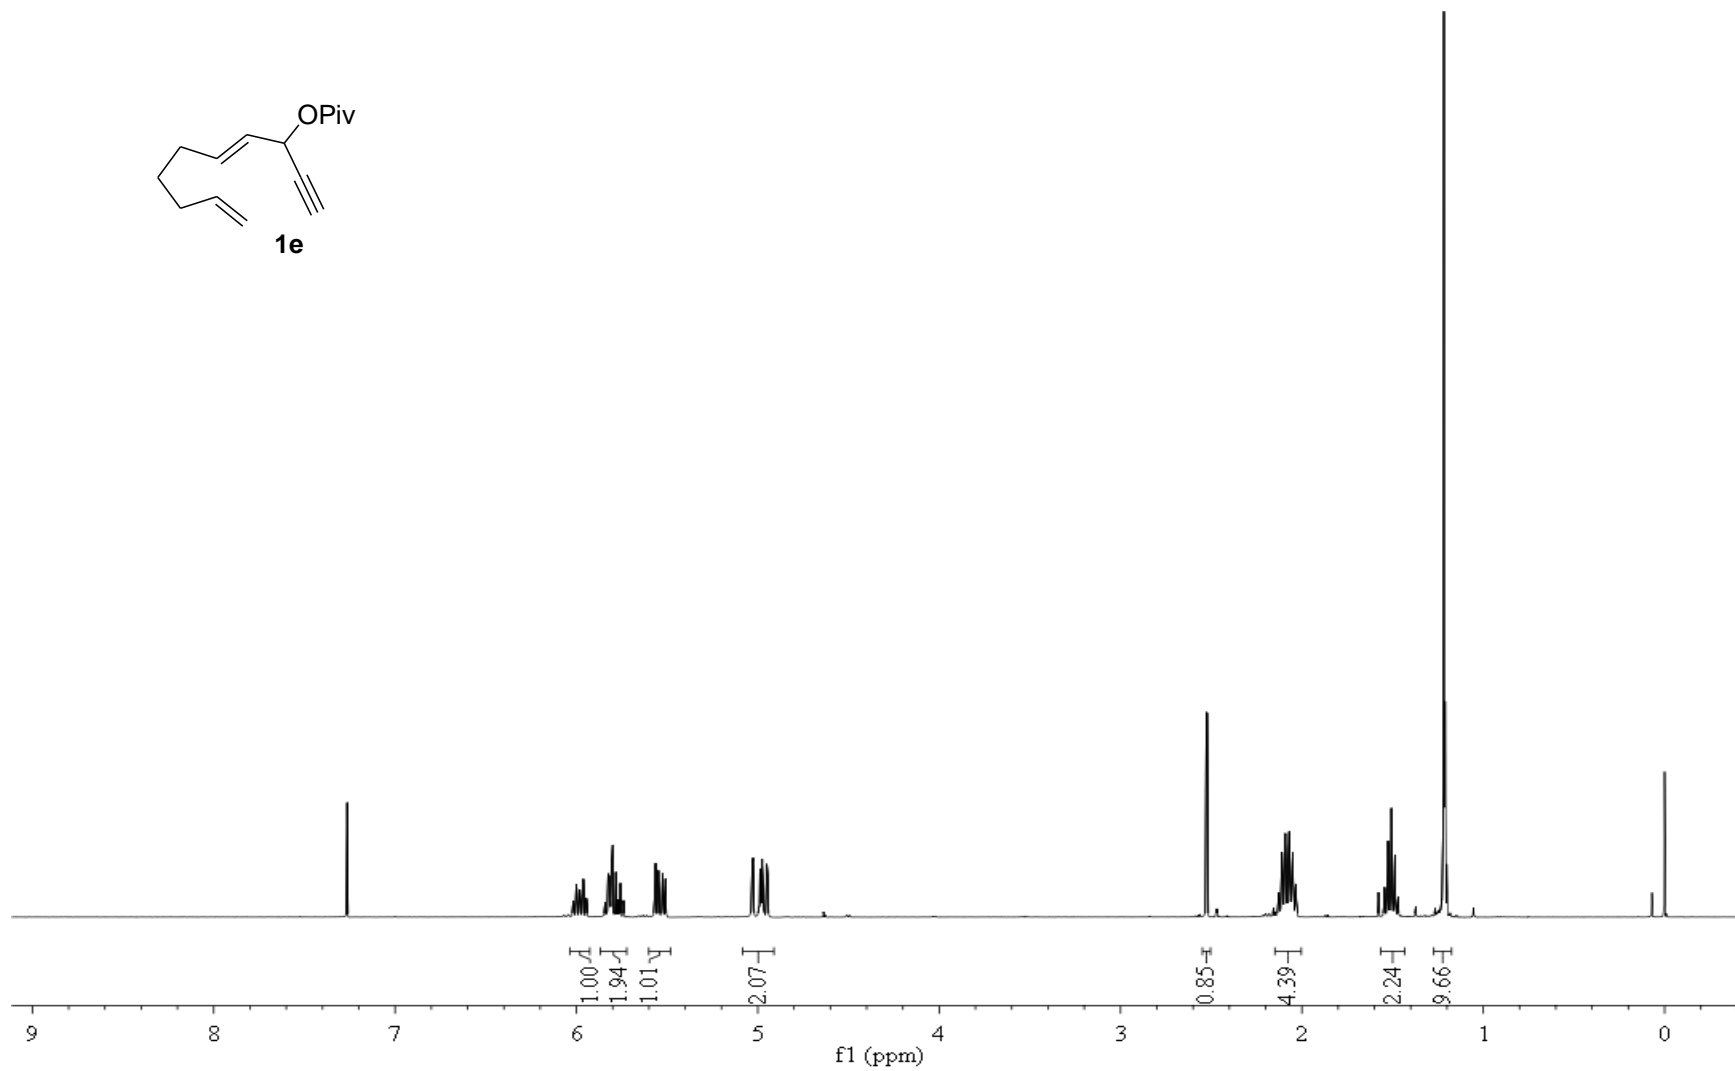

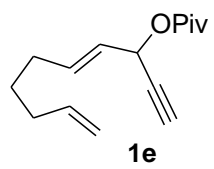

—177.357

~138.623  
~136.326

—125.201

—115.028

80.346  
77.578  
77.260  
76.943  
74.552  
—64.018

38.943  
33.314  
31.549  
28.071  
27.241

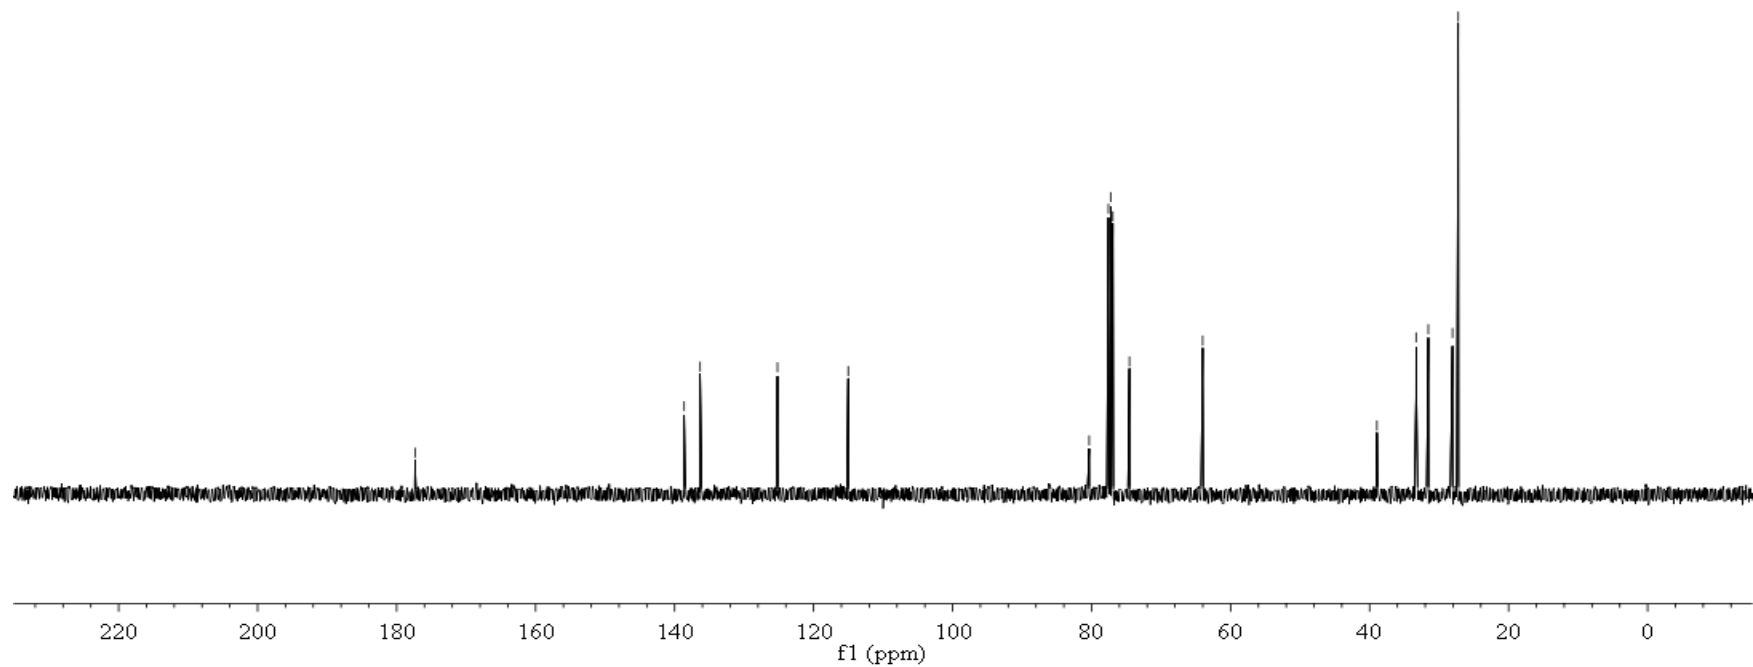

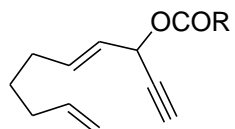

**1f** (R = *p*-Me<sub>2</sub>NC<sub>6</sub>H<sub>4</sub>)

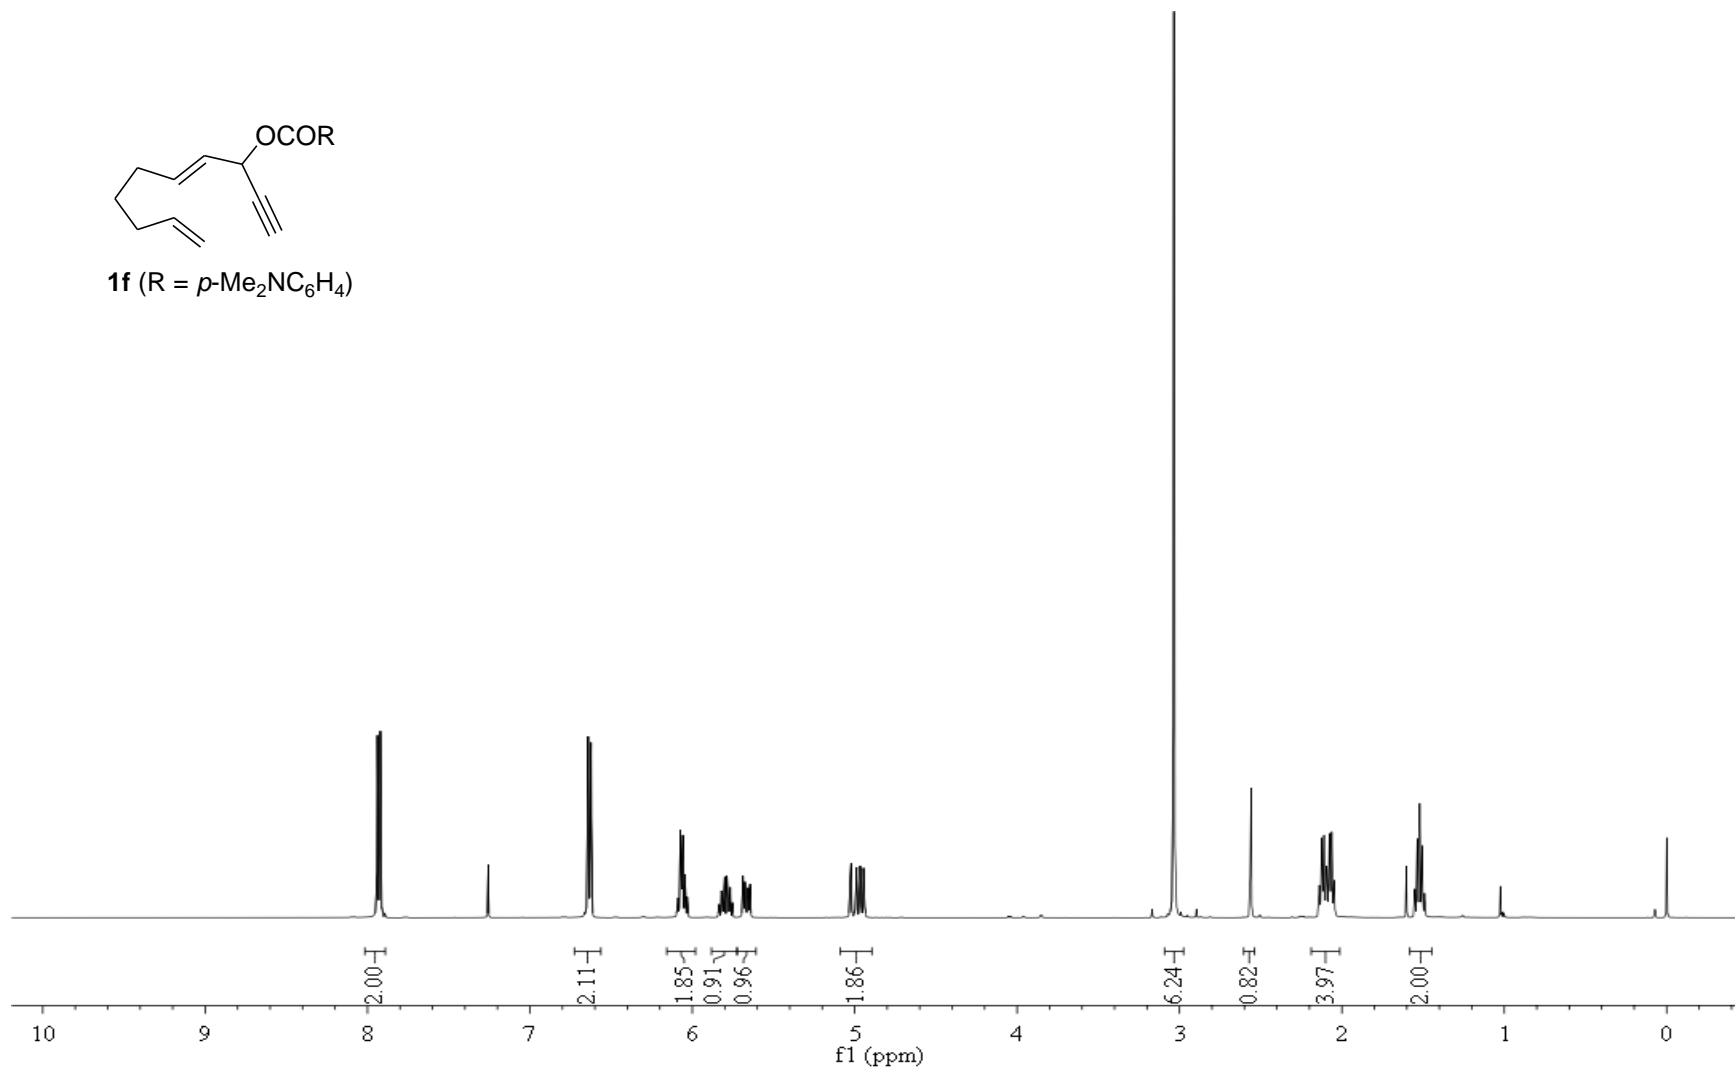

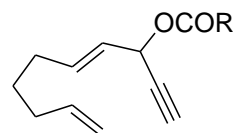

**1f** (R = *p*-Me<sub>2</sub>NC<sub>6</sub>H<sub>4</sub>)

—165.849  
—153.717  
—138.675  
—136.094  
—131.806  
—125.578  
—116.603  
—114.974  
—110.878  
80.776  
77.515  
77.260  
77.006  
74.586  
—63.831  
—40.272  
33.380  
31.603  
—28.088

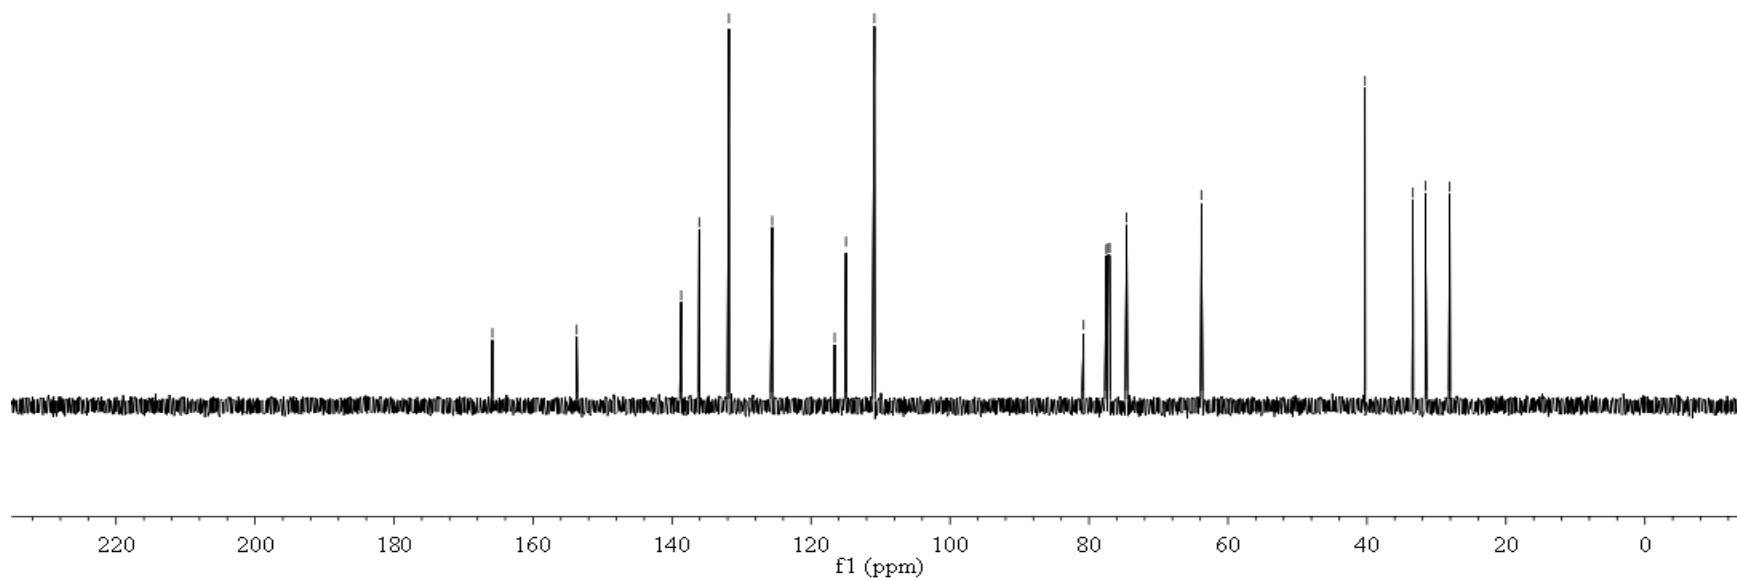

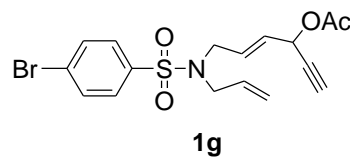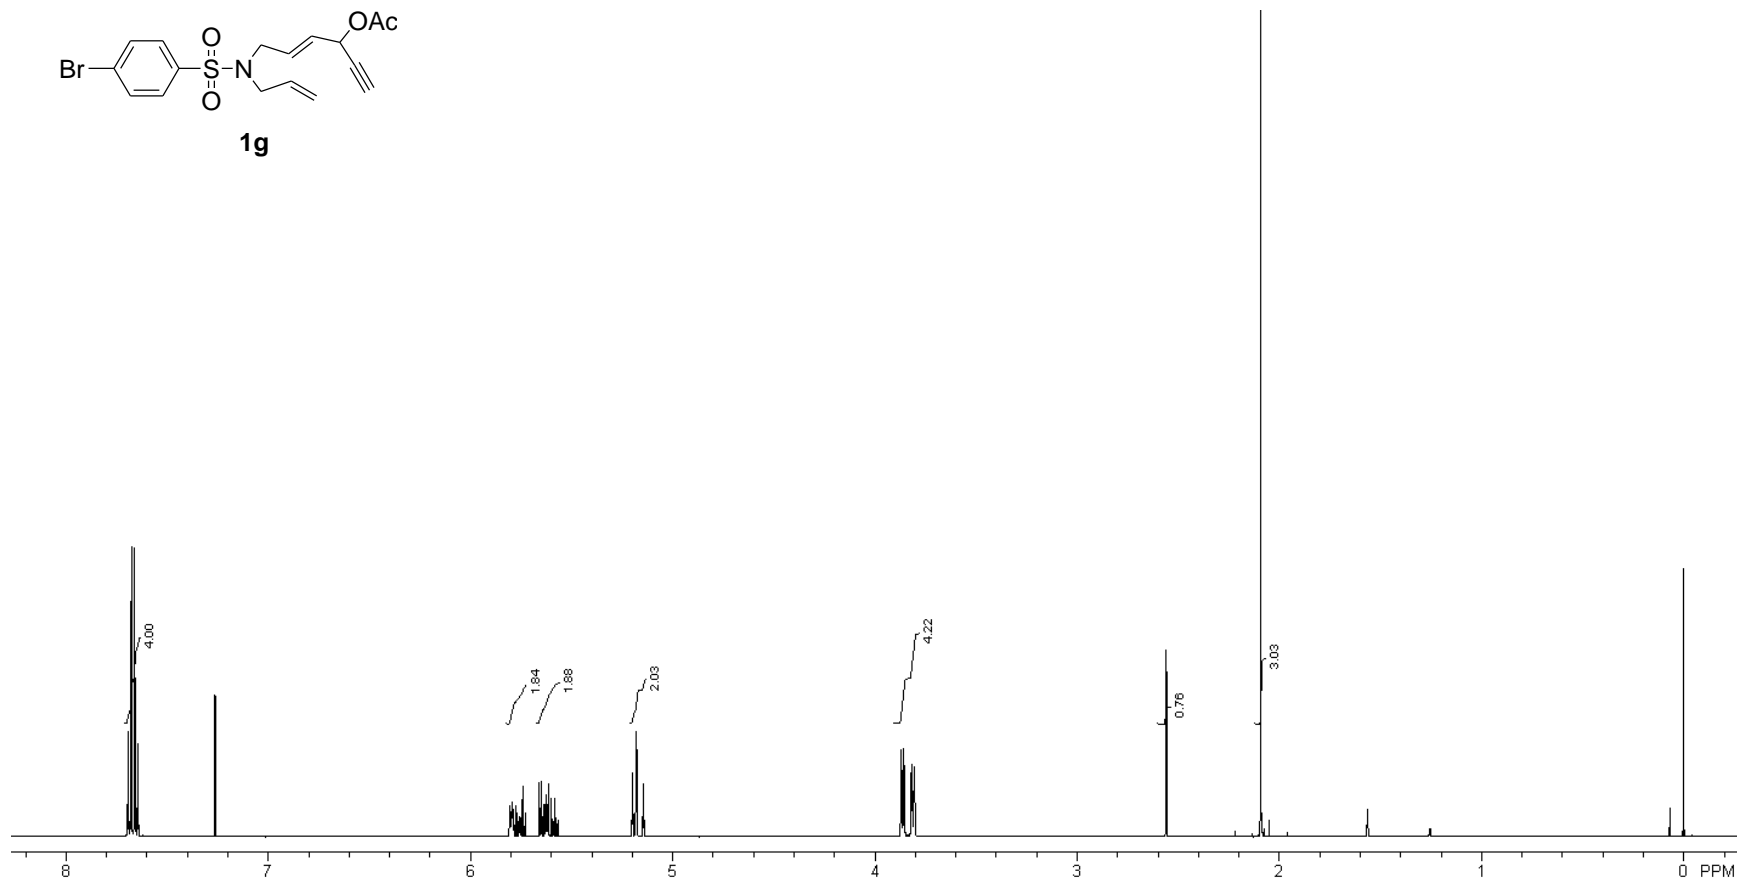

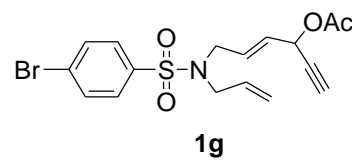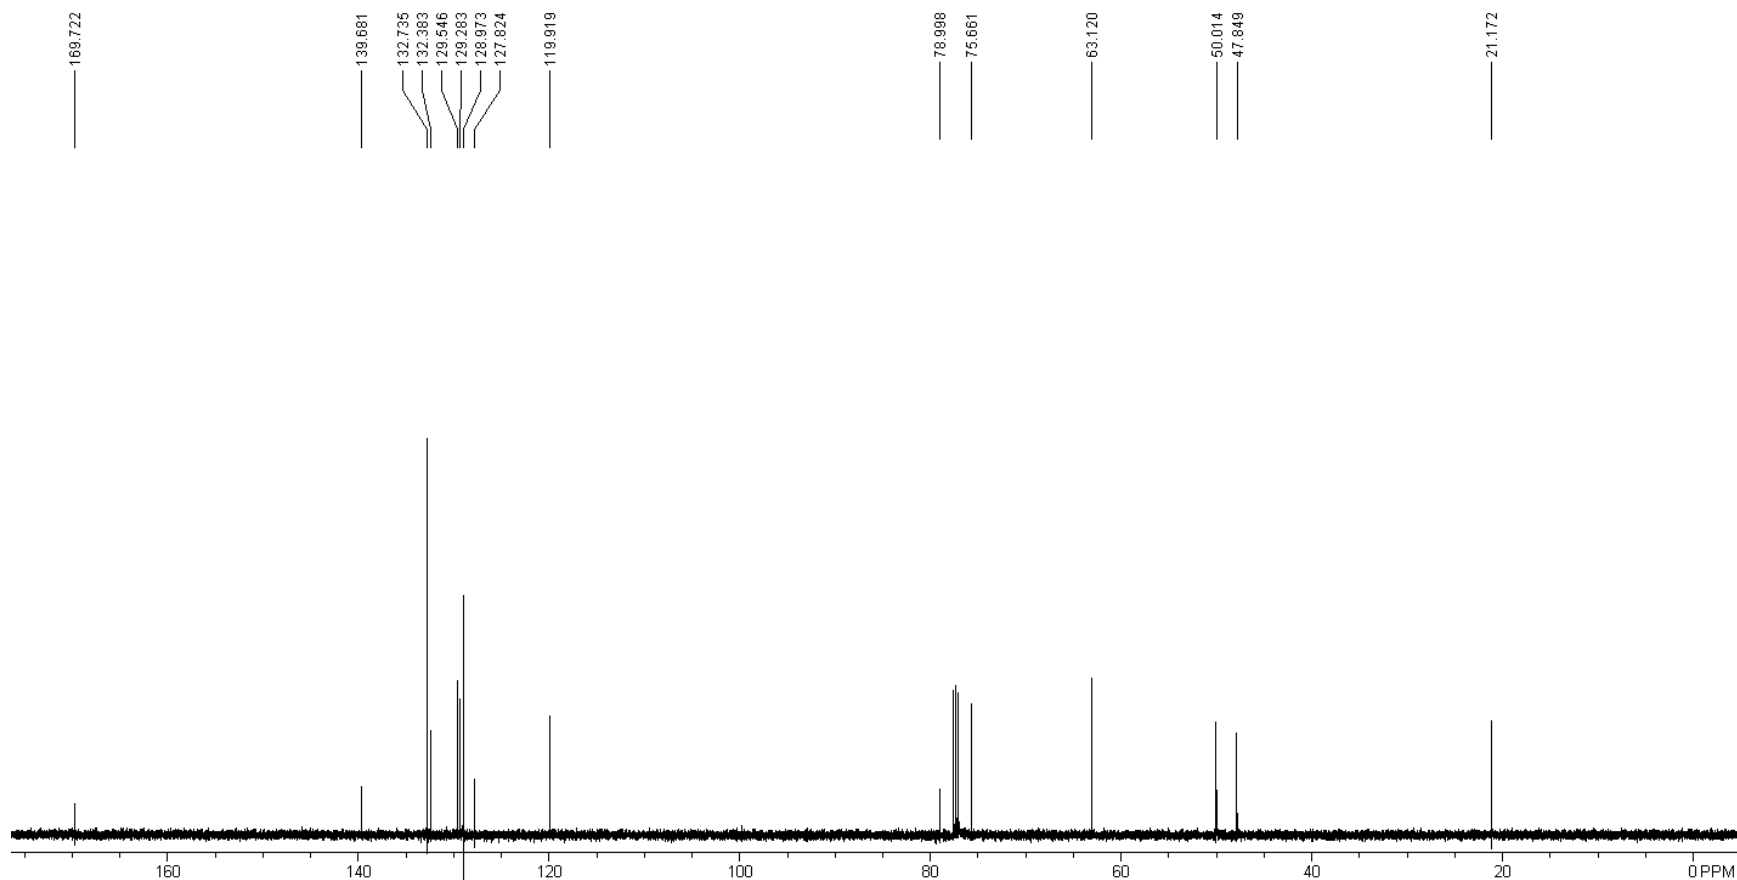

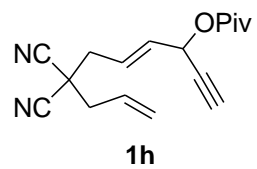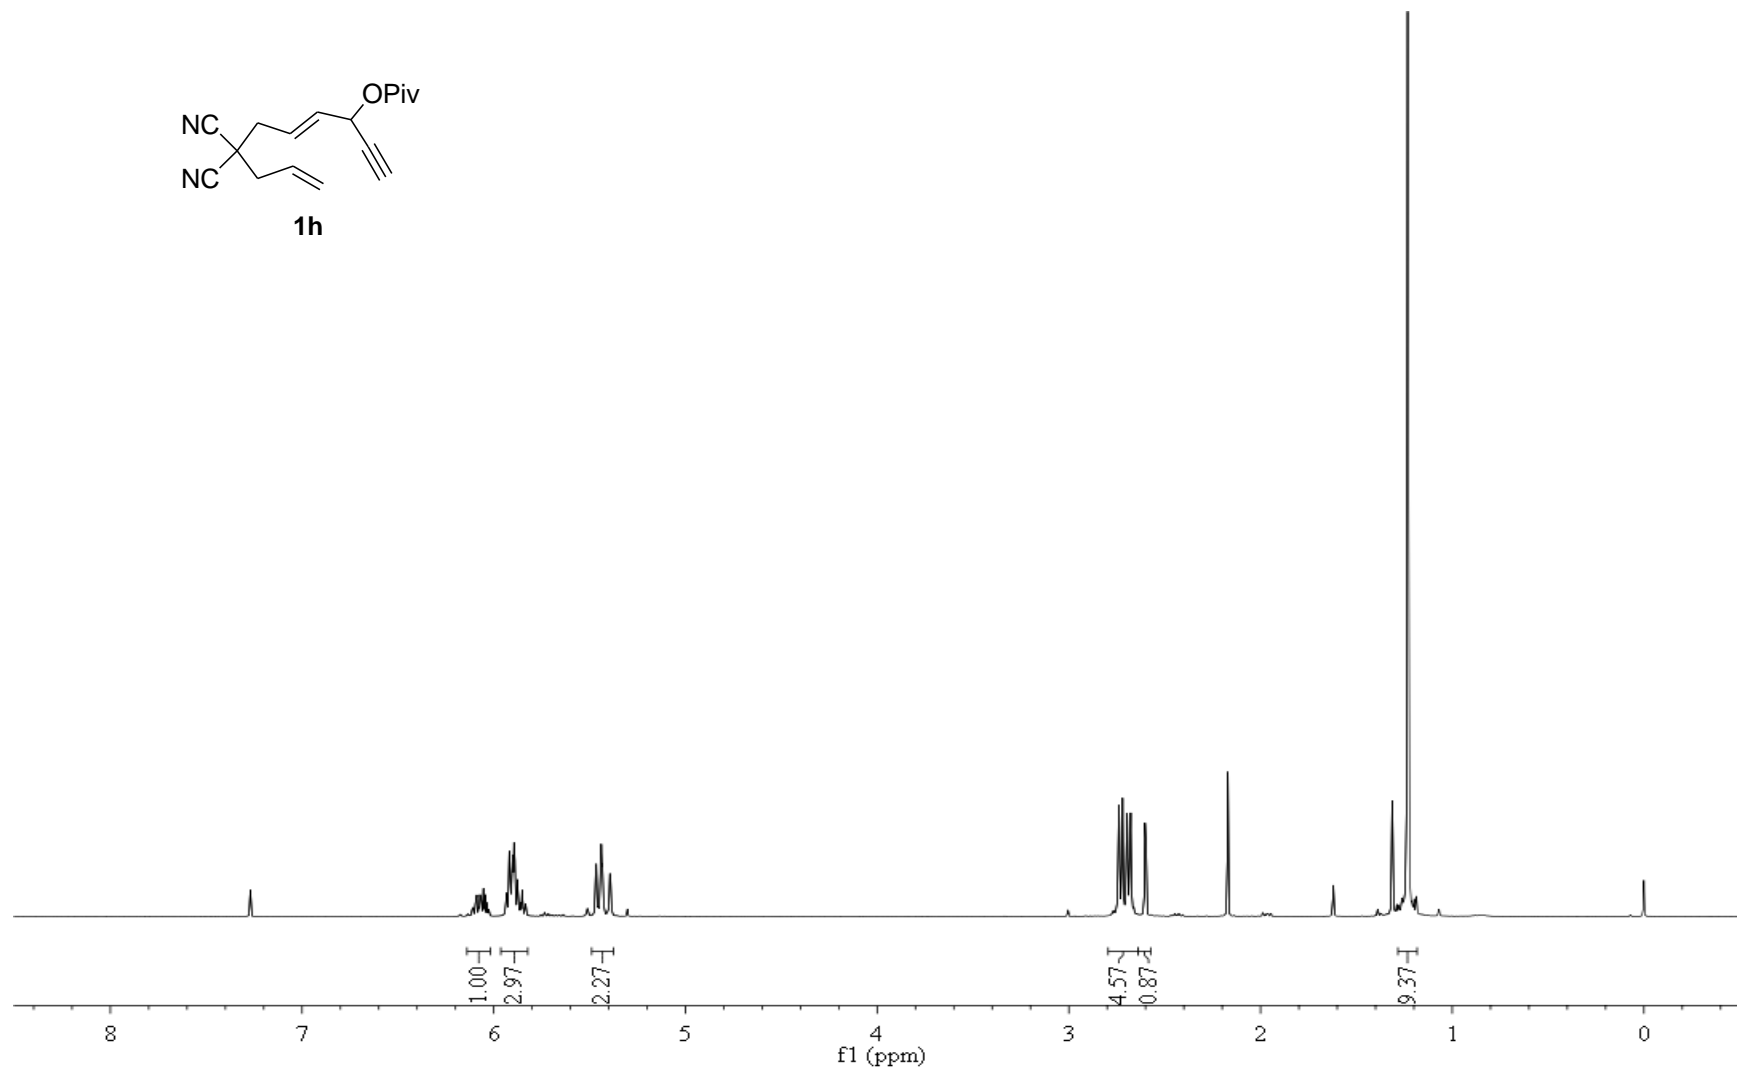



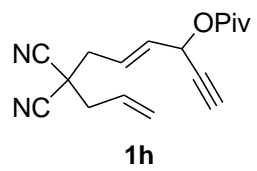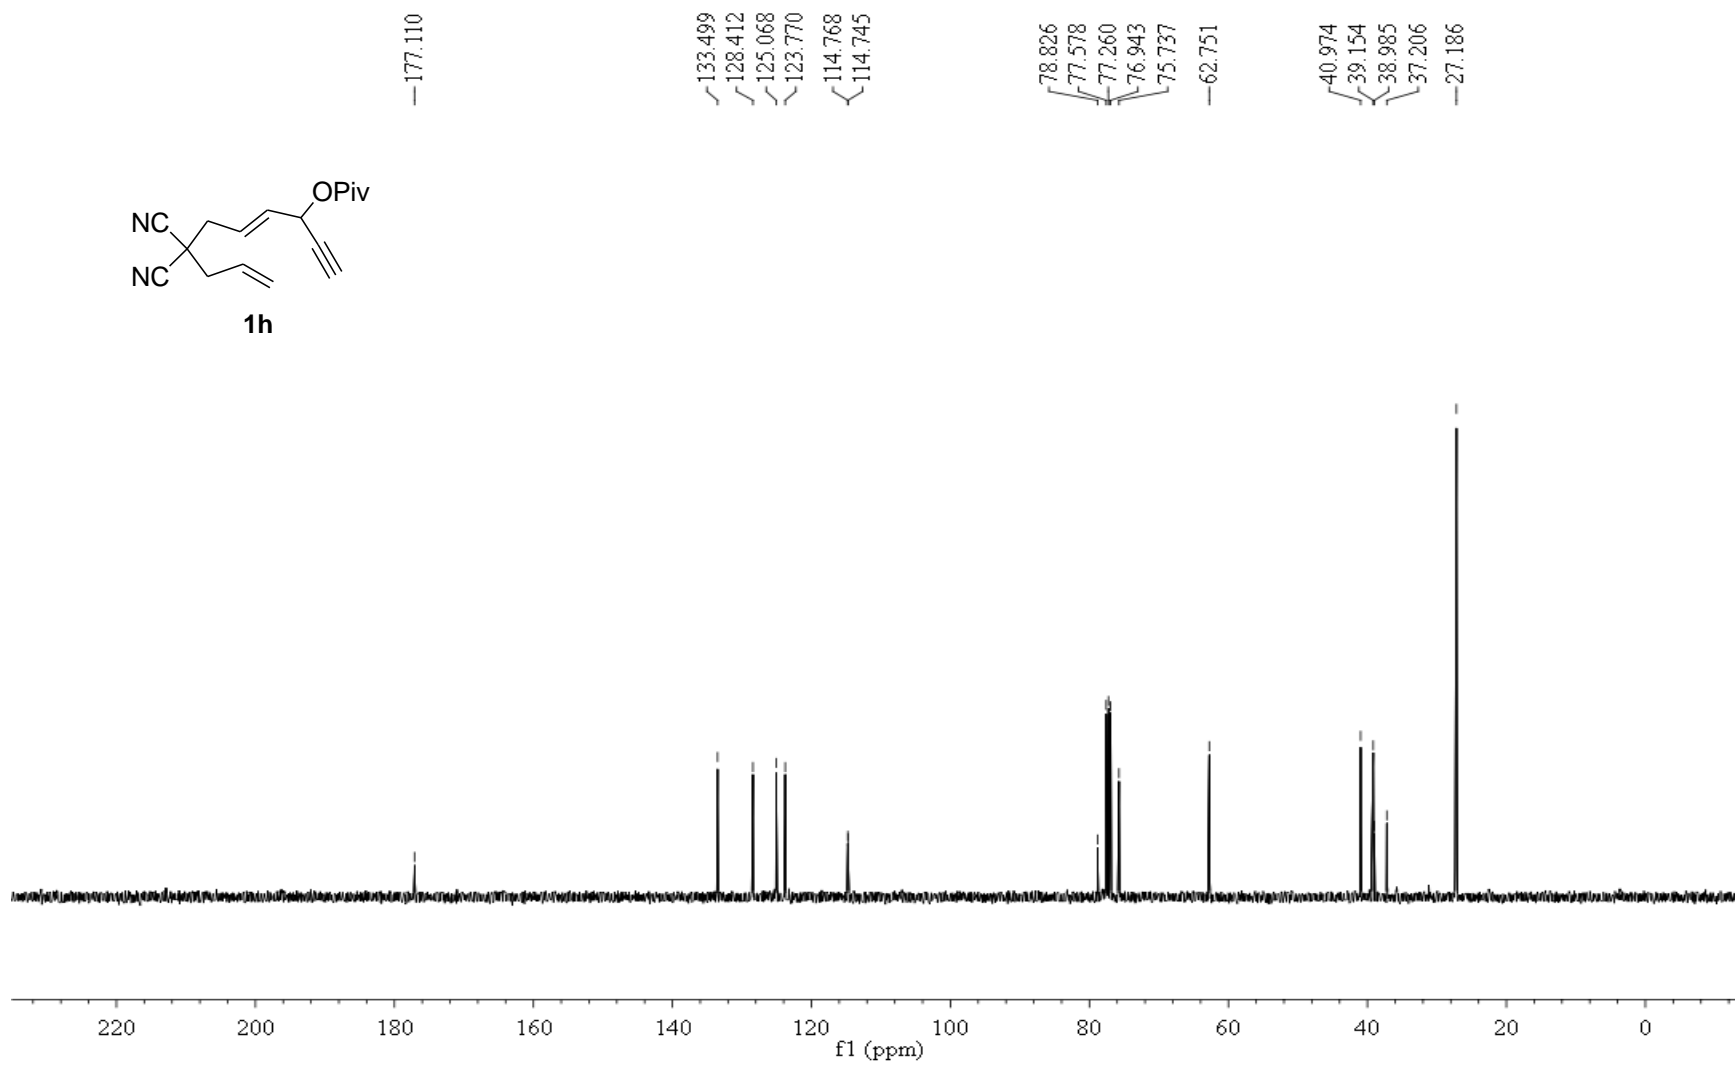

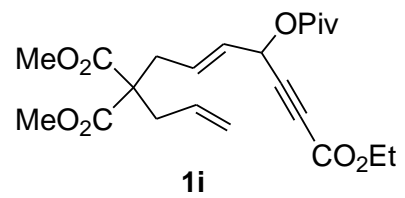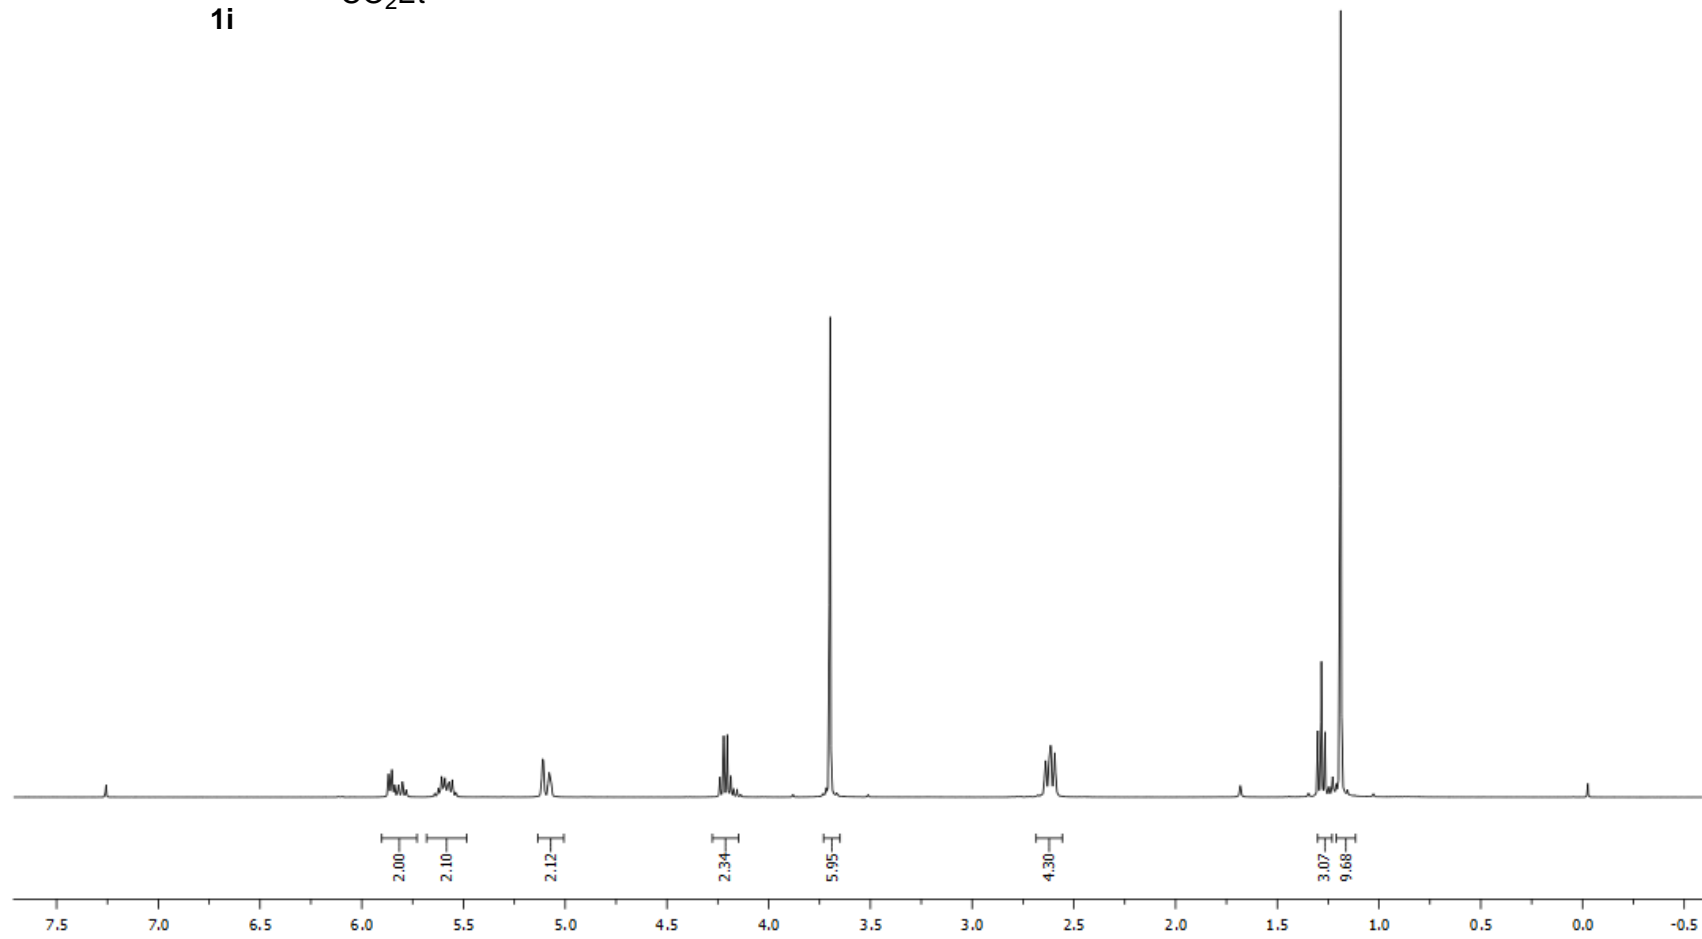

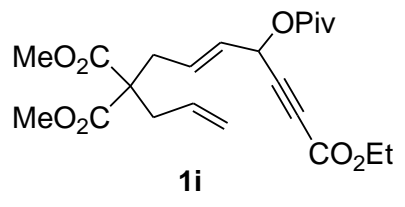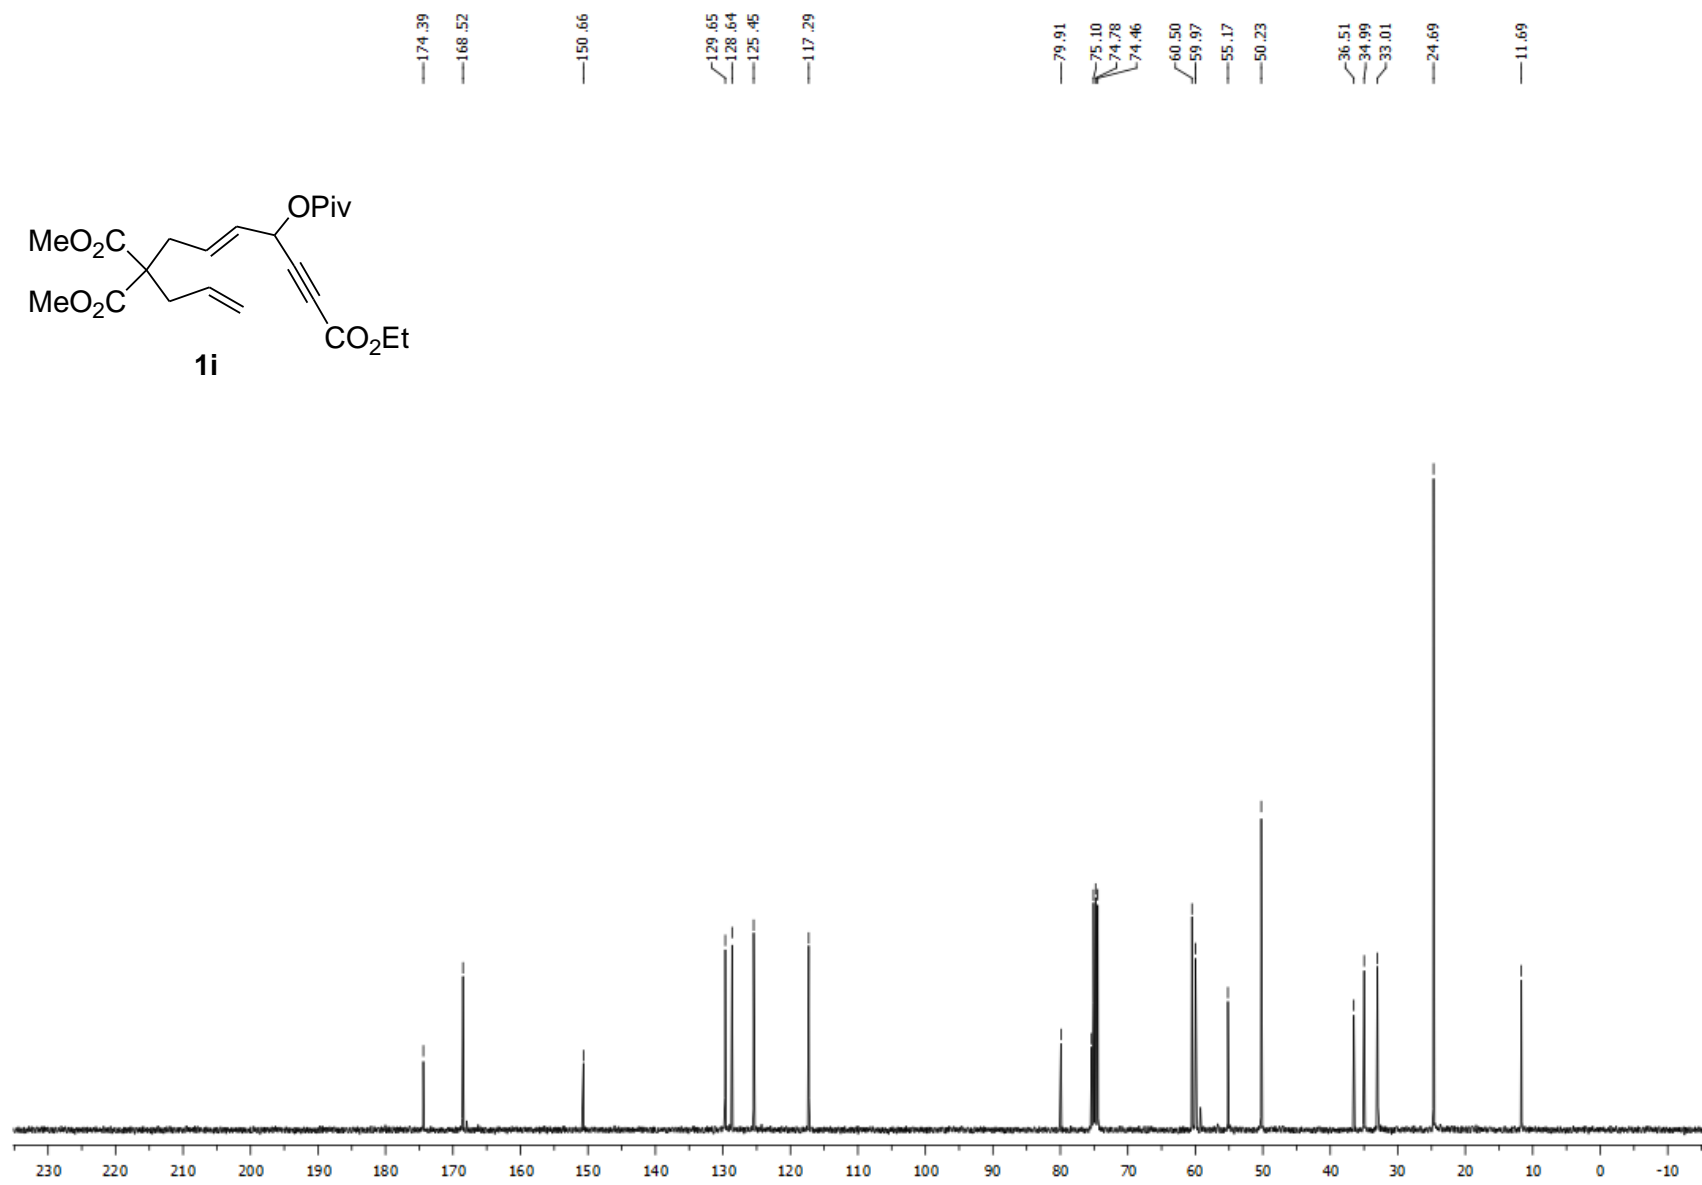

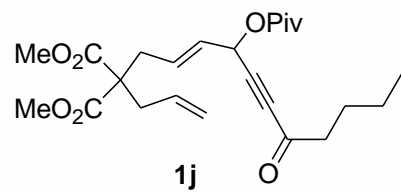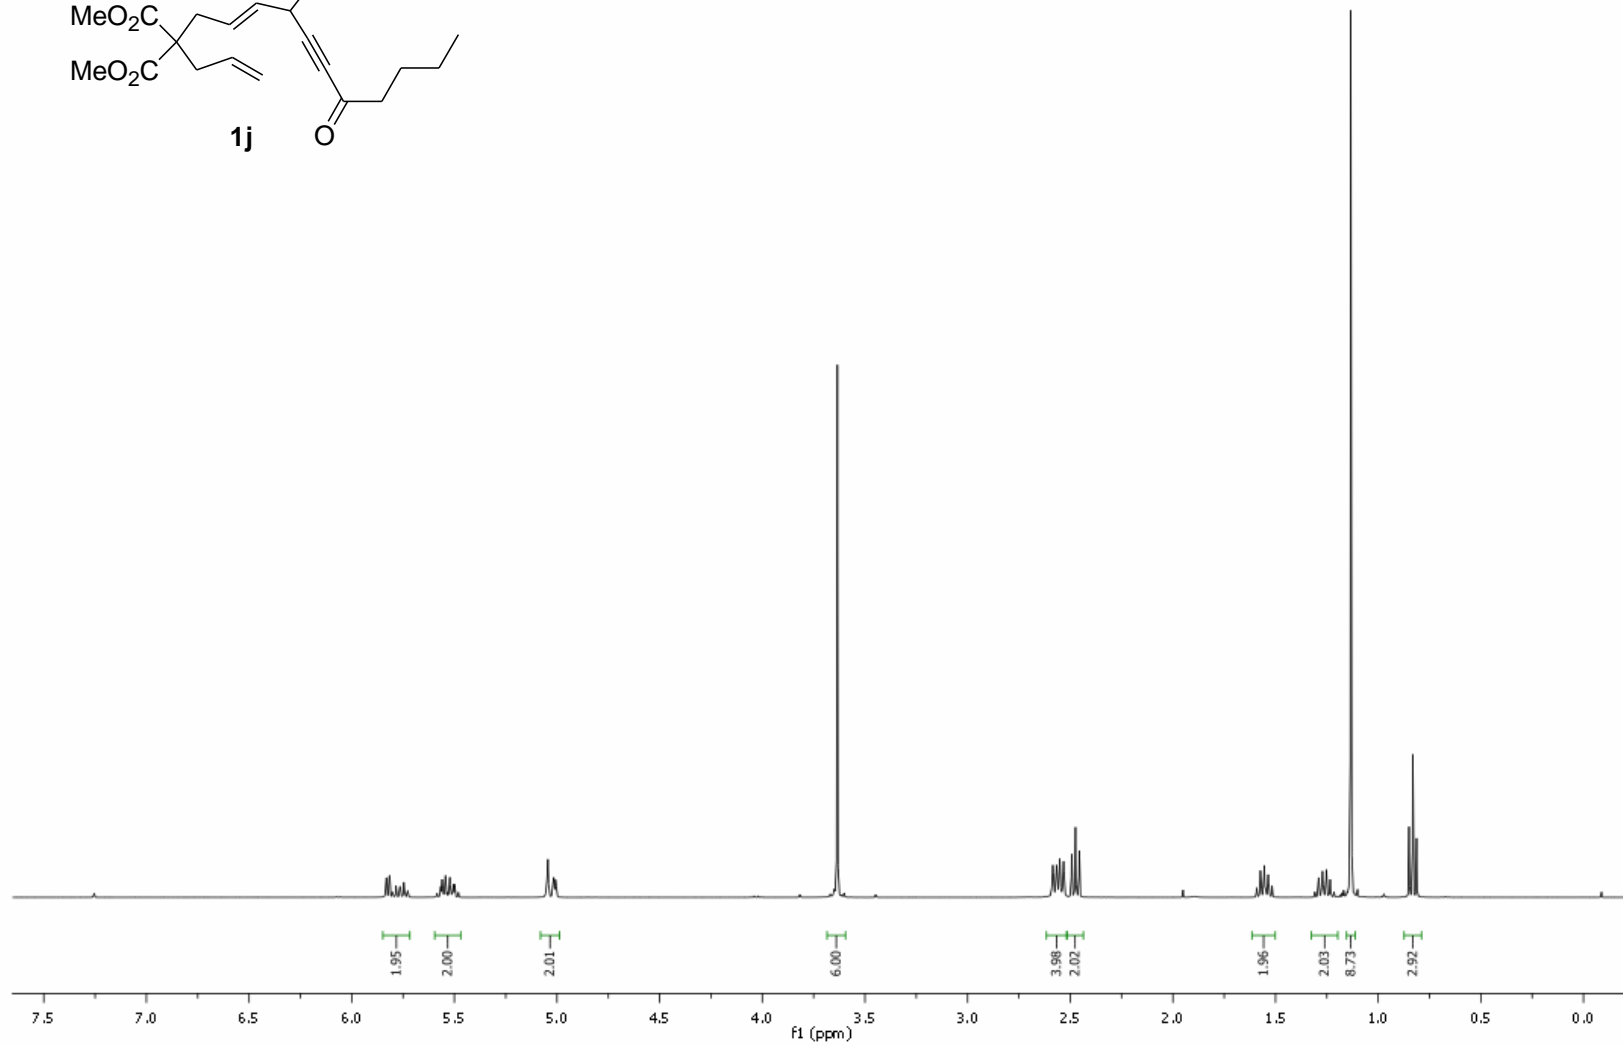

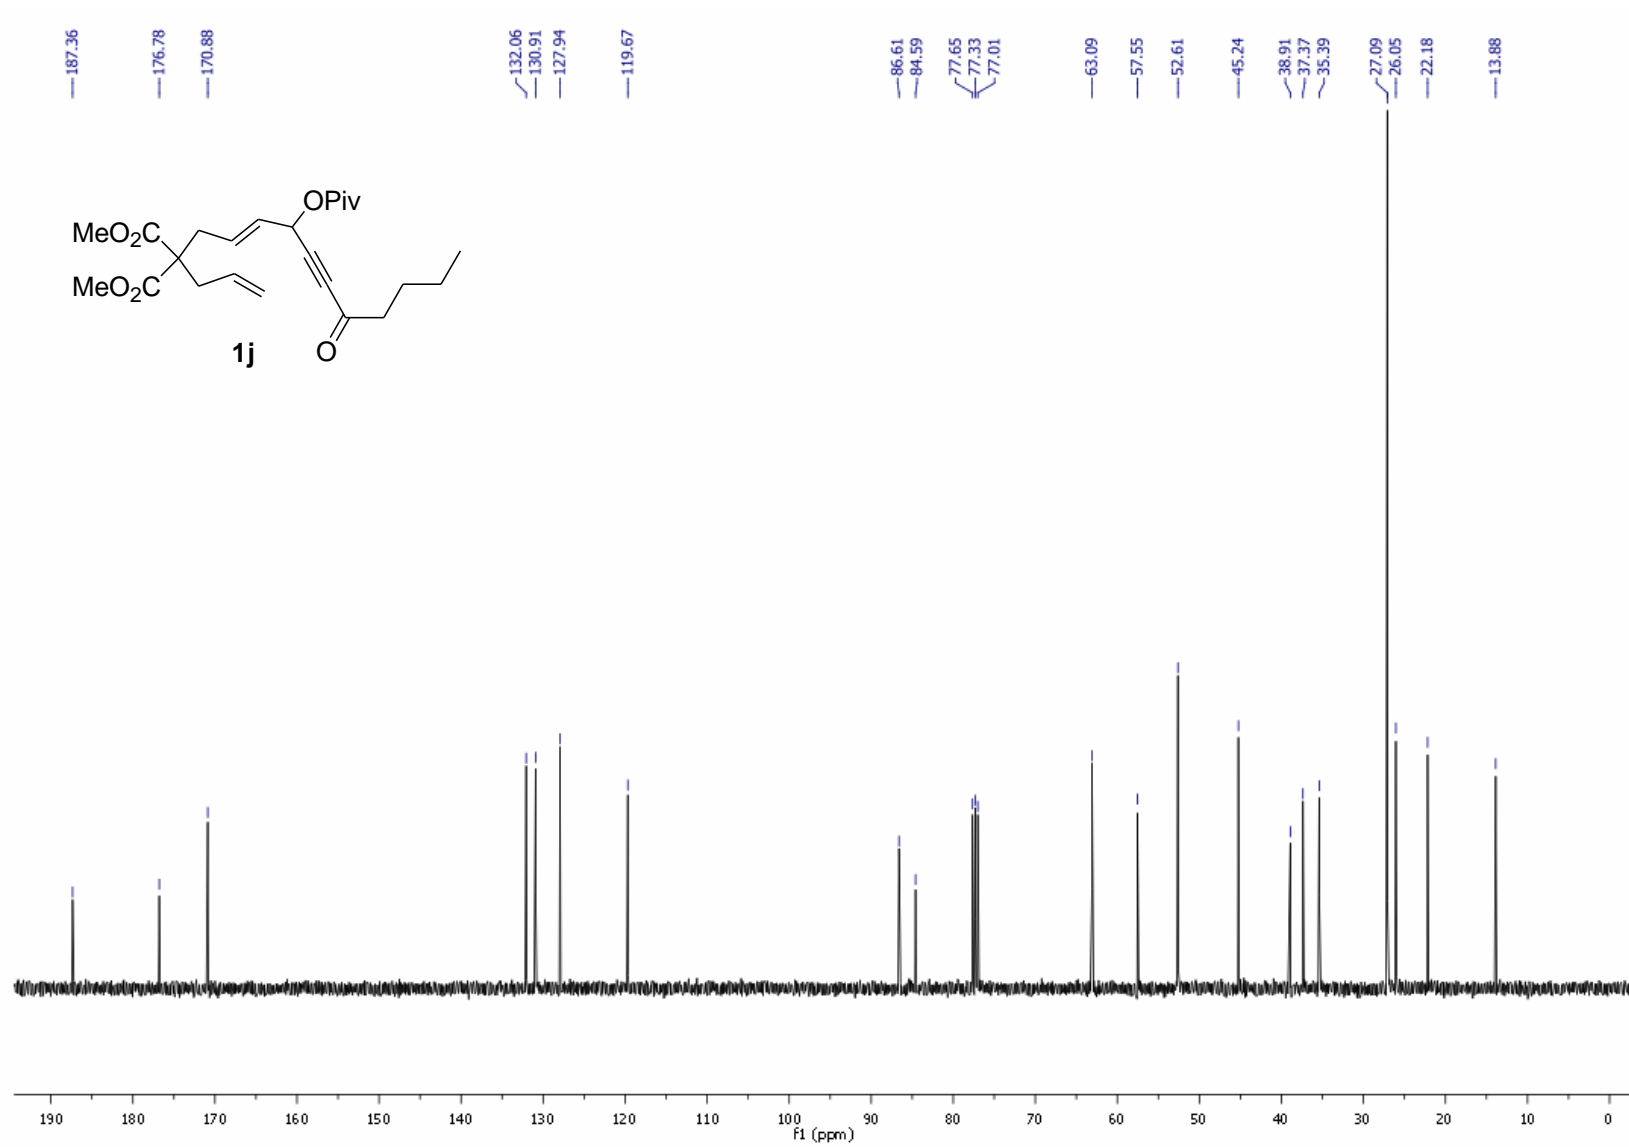

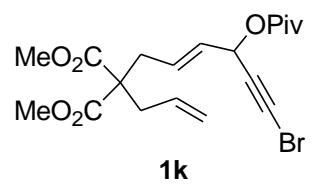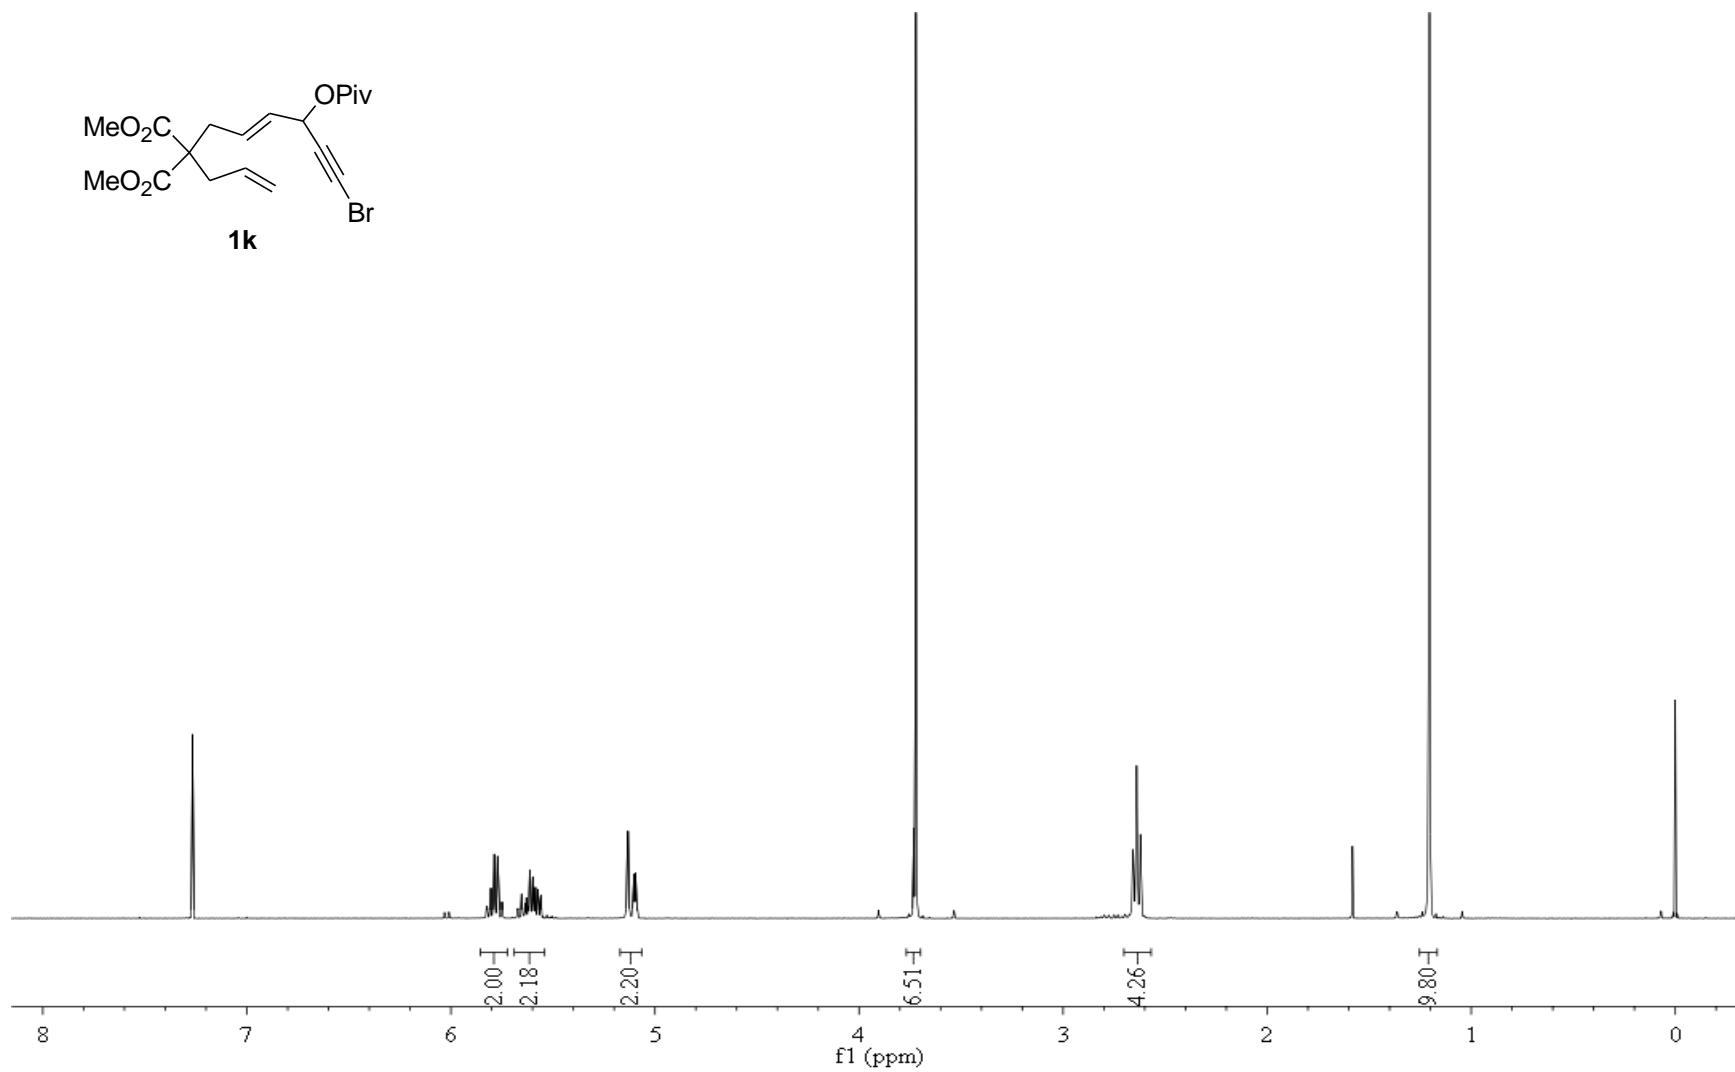

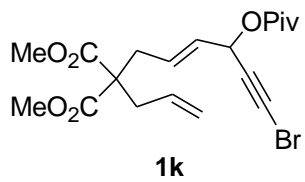

—177.076  
—171.075

✓132.202  
✓129.826  
✓129.349  
—119.708

✓77.546  
✓77.228  
✓76.911  
✓76.295  
✓64.335  
✓57.713  
✓52.691  
✓47.358  
✓38.979  
✓37.404  
✓35.437  
✓27.214

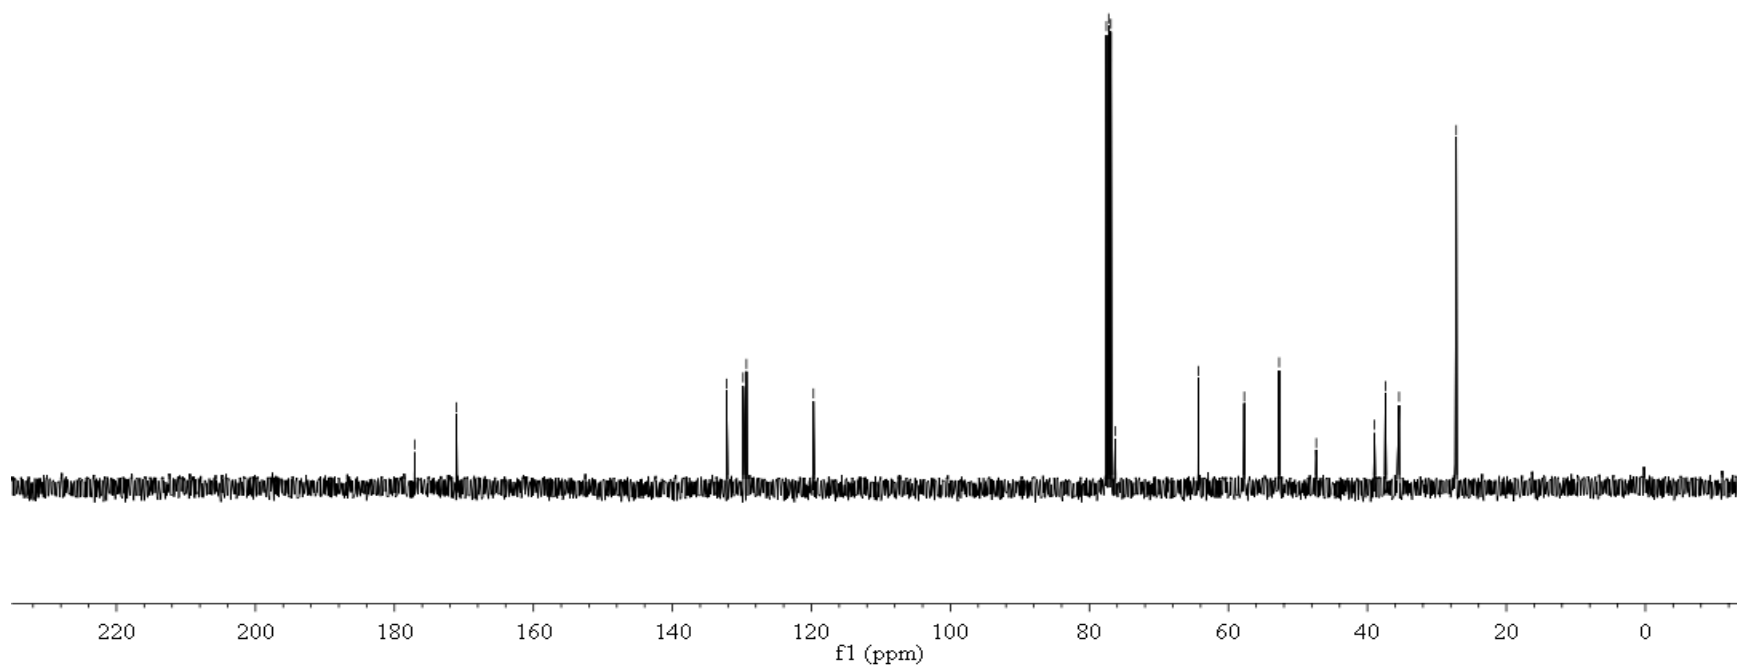

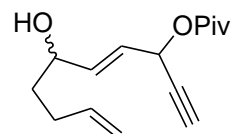

**11** (dr = 1:1)

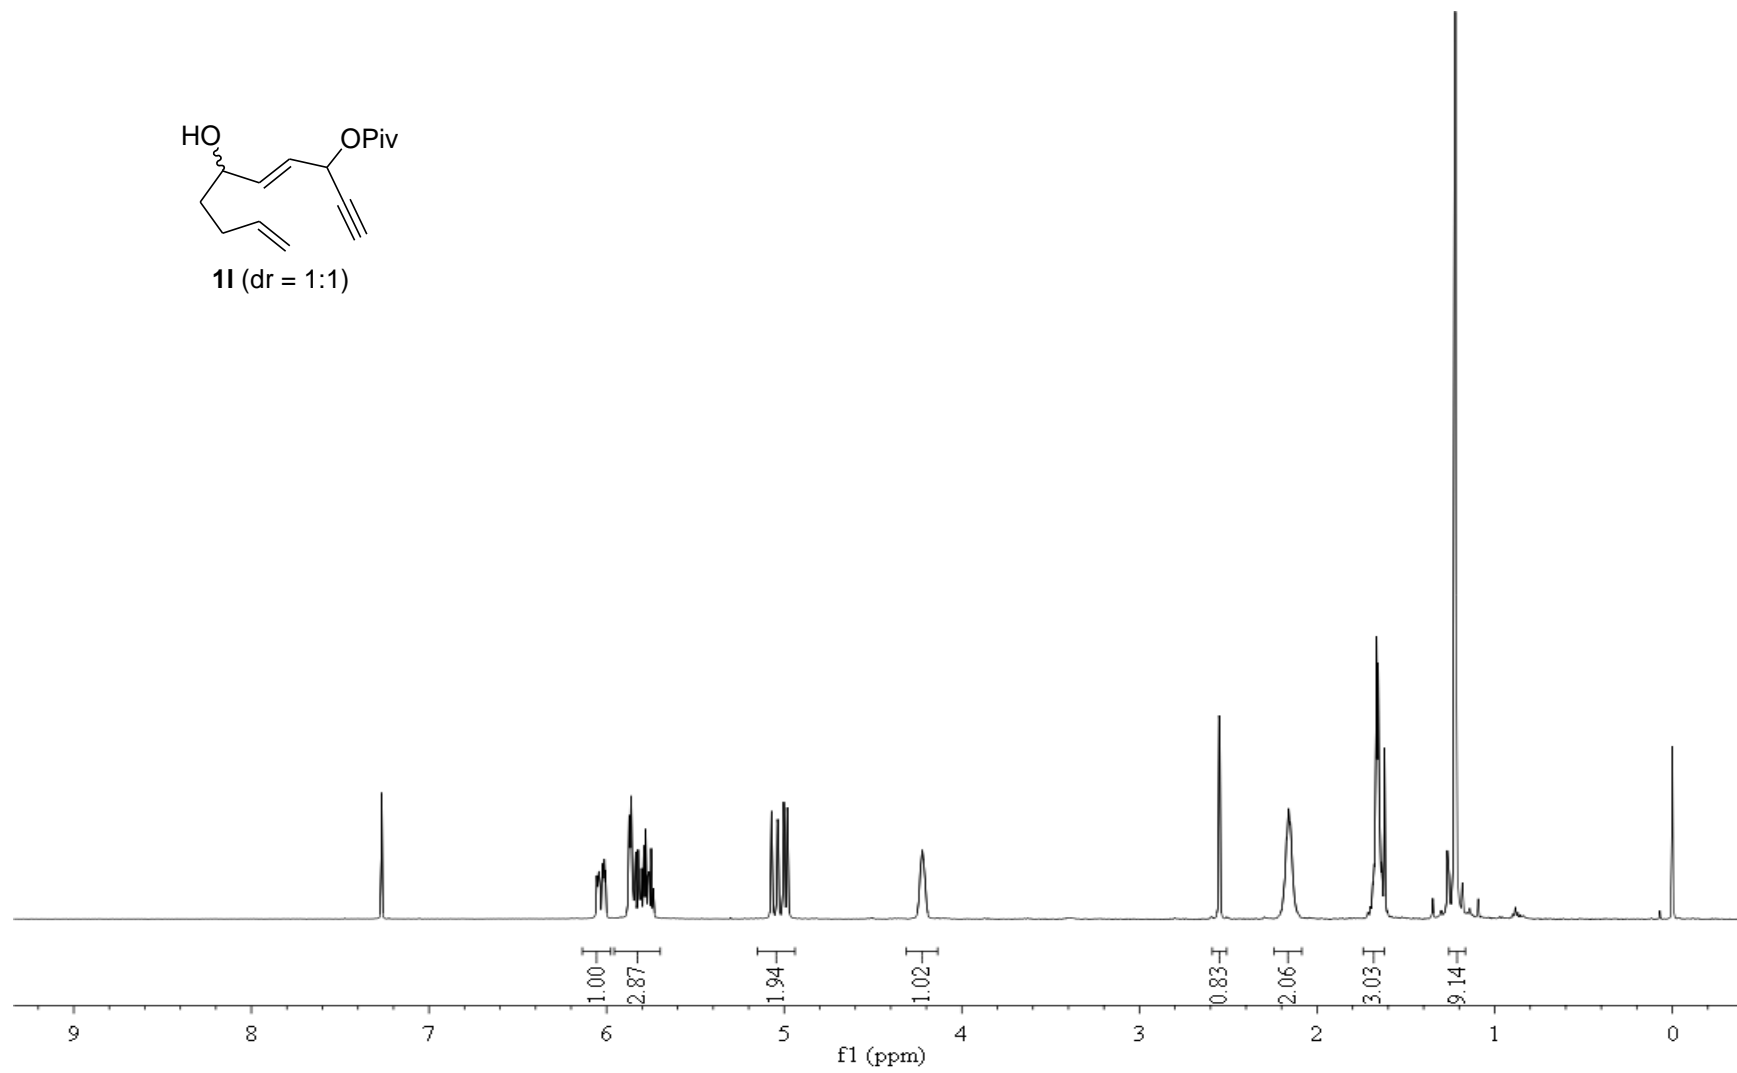



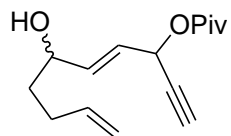

**11** (dr = 1:1)

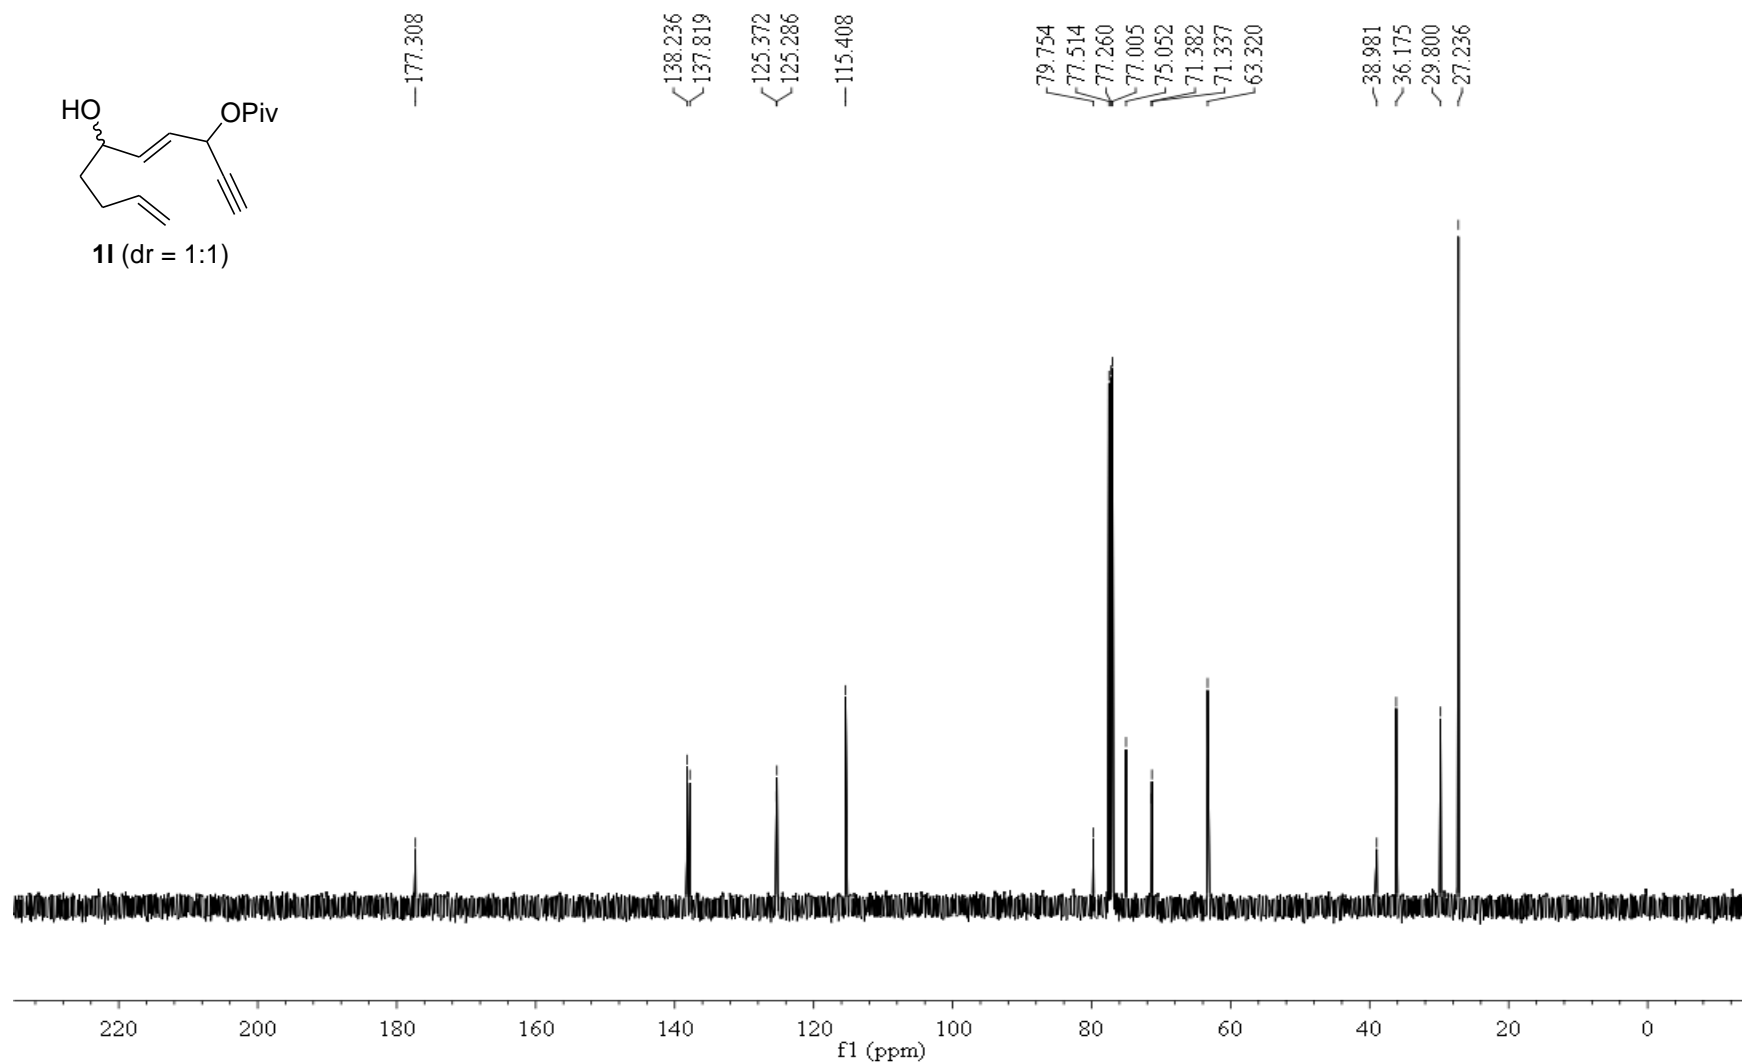

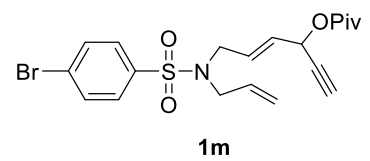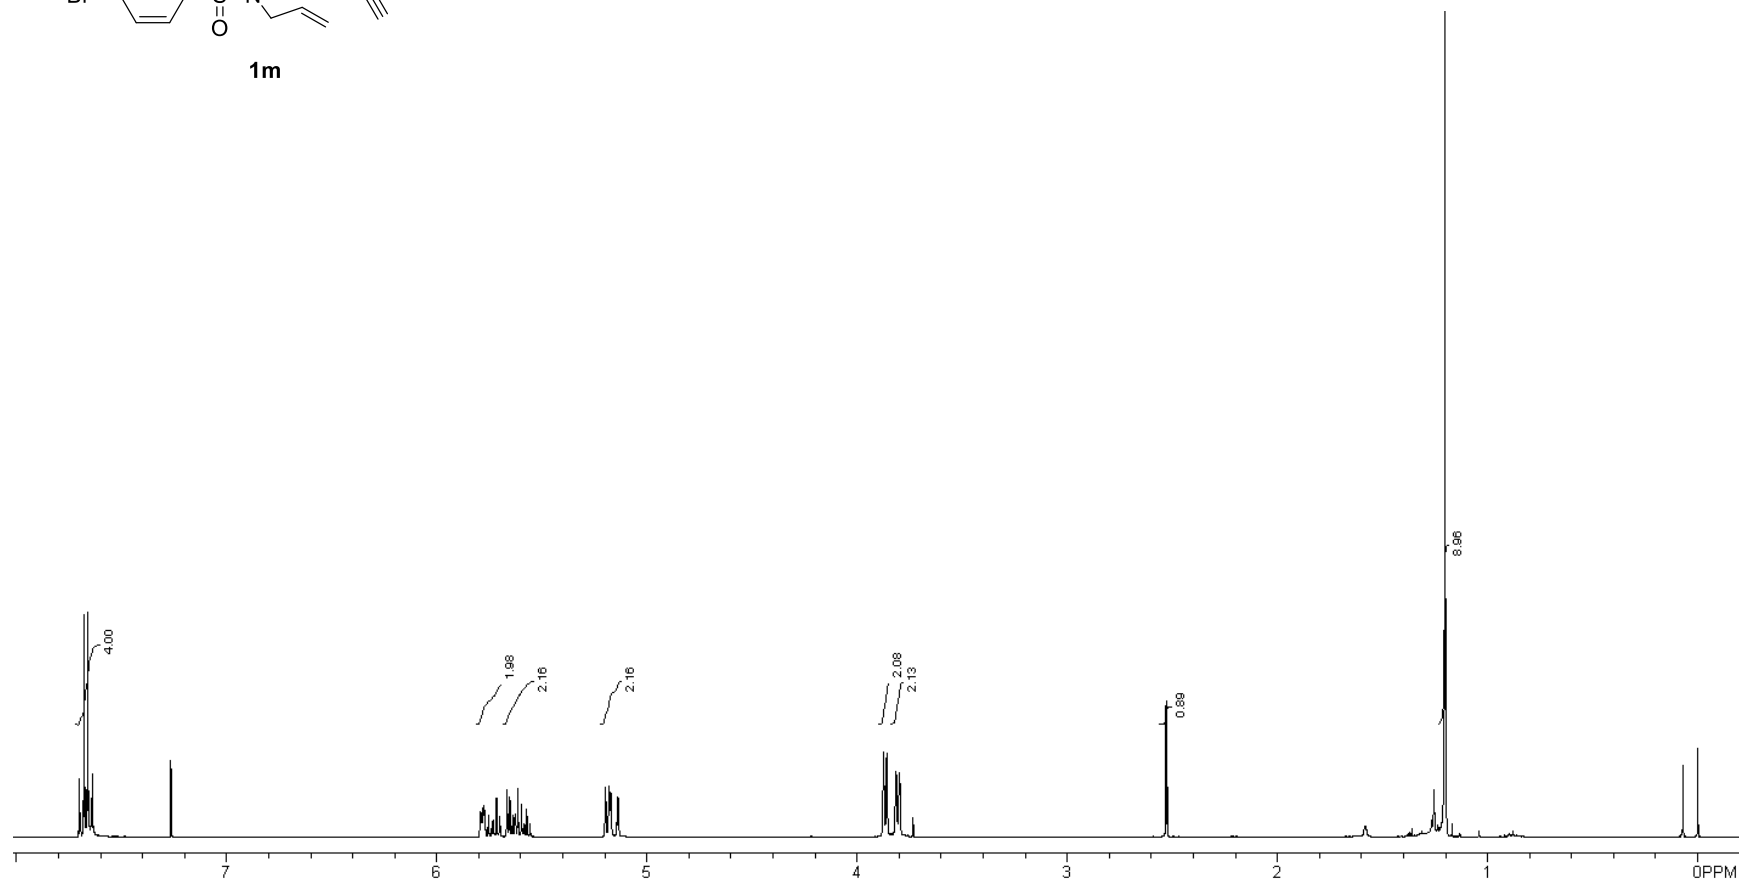

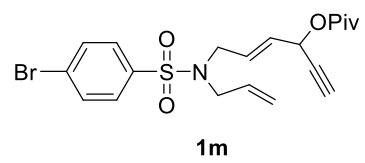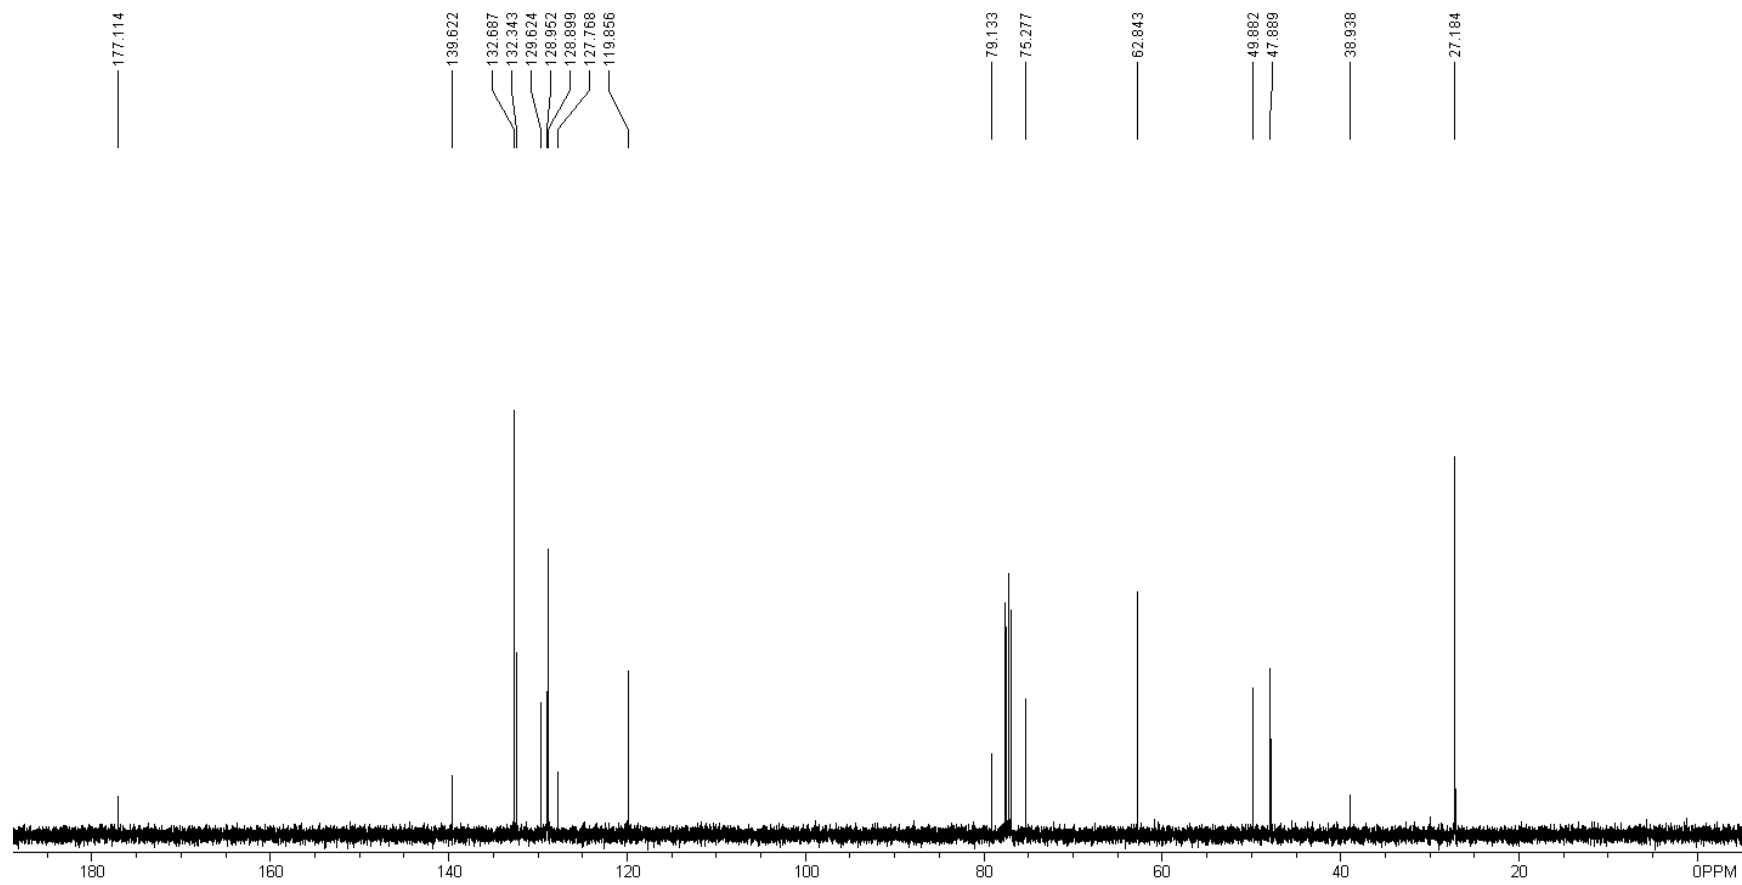

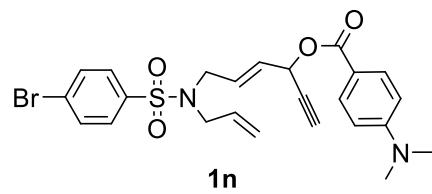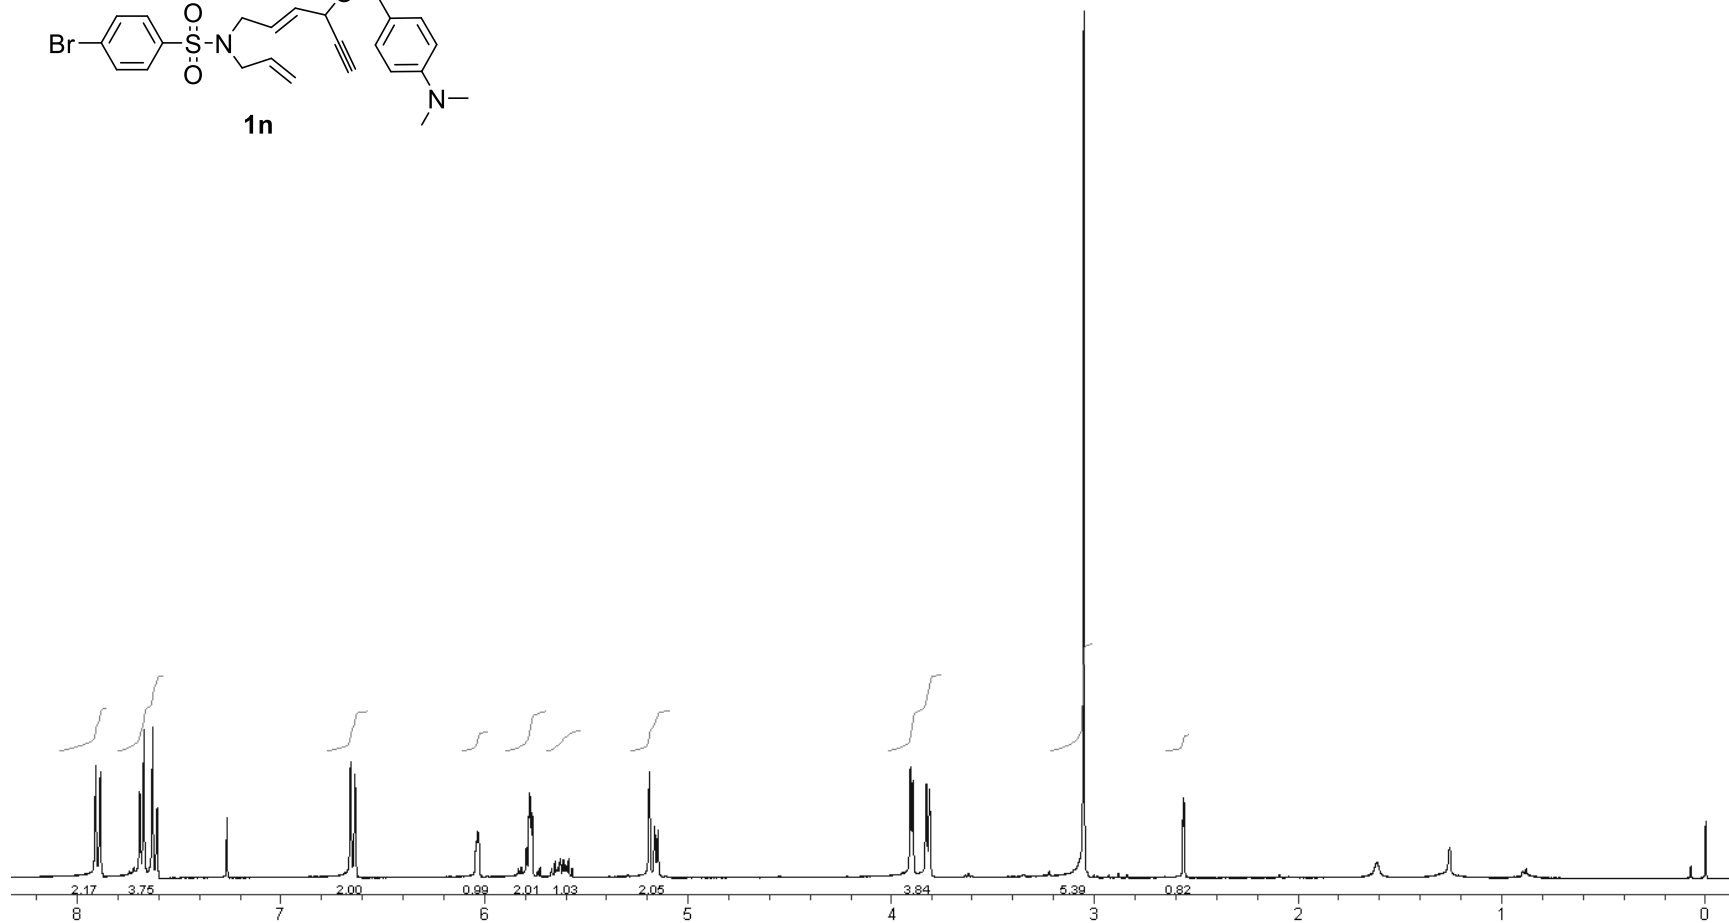

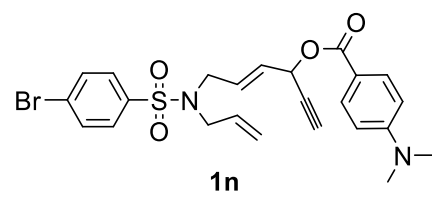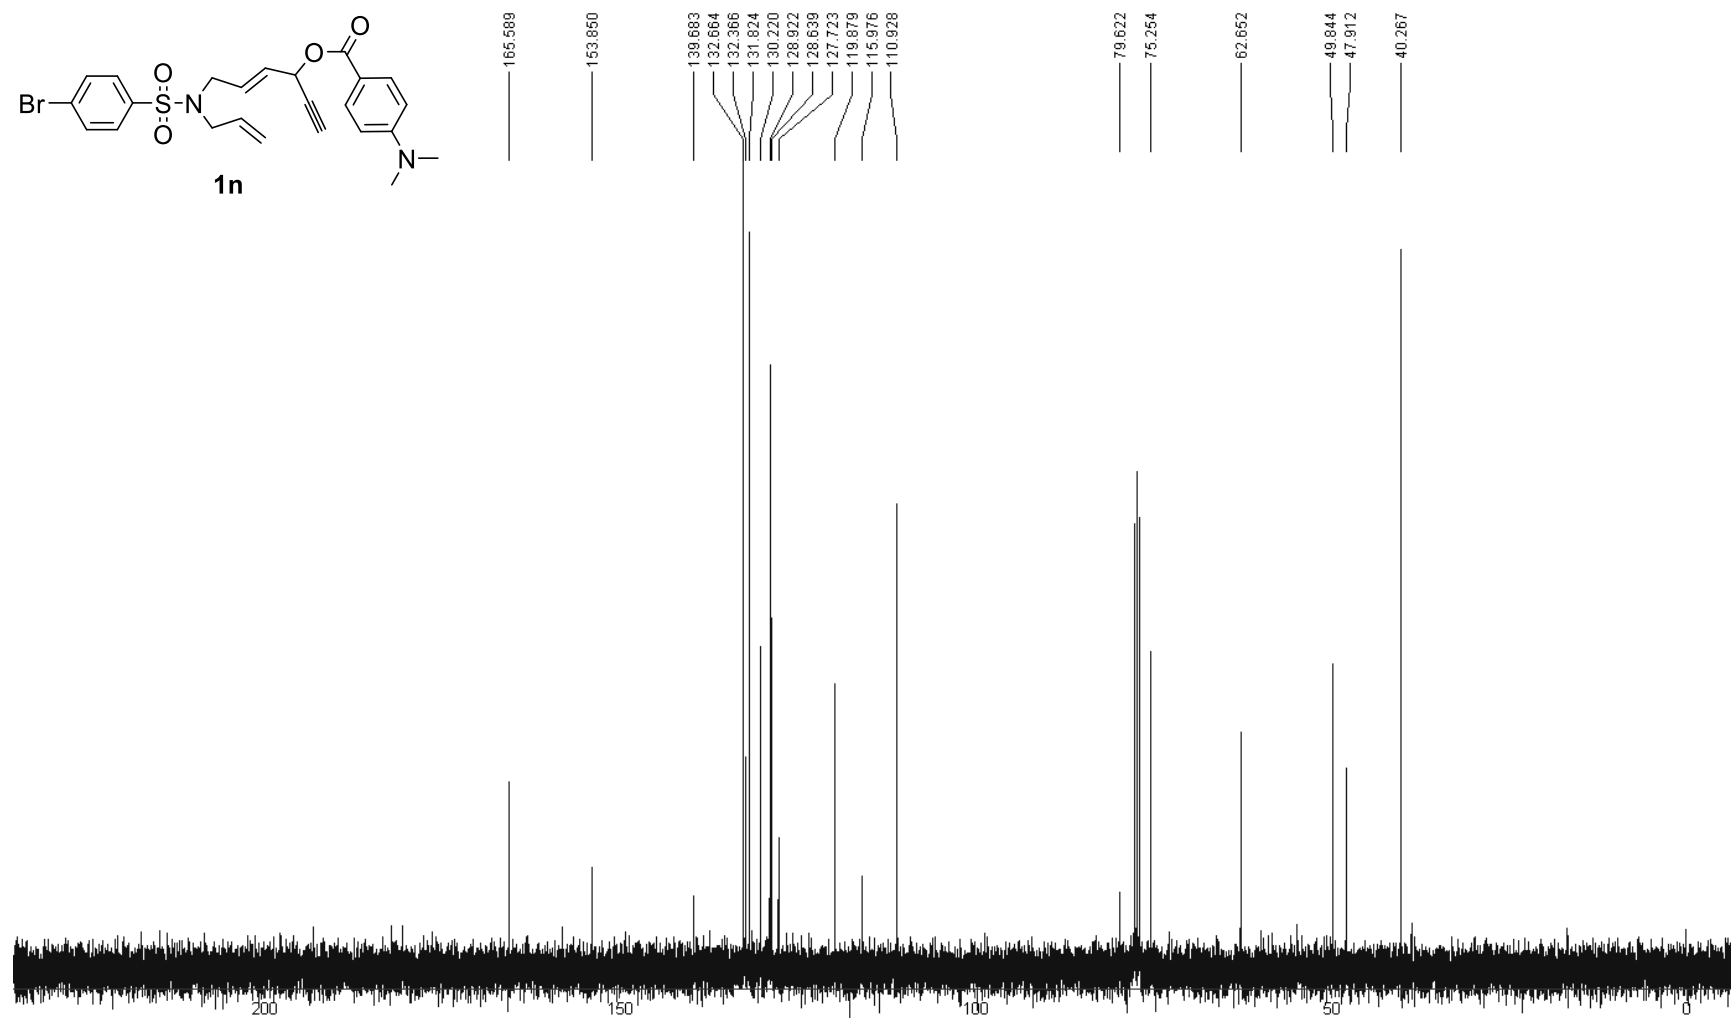

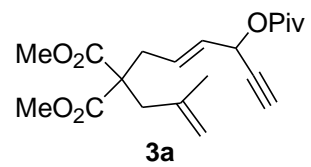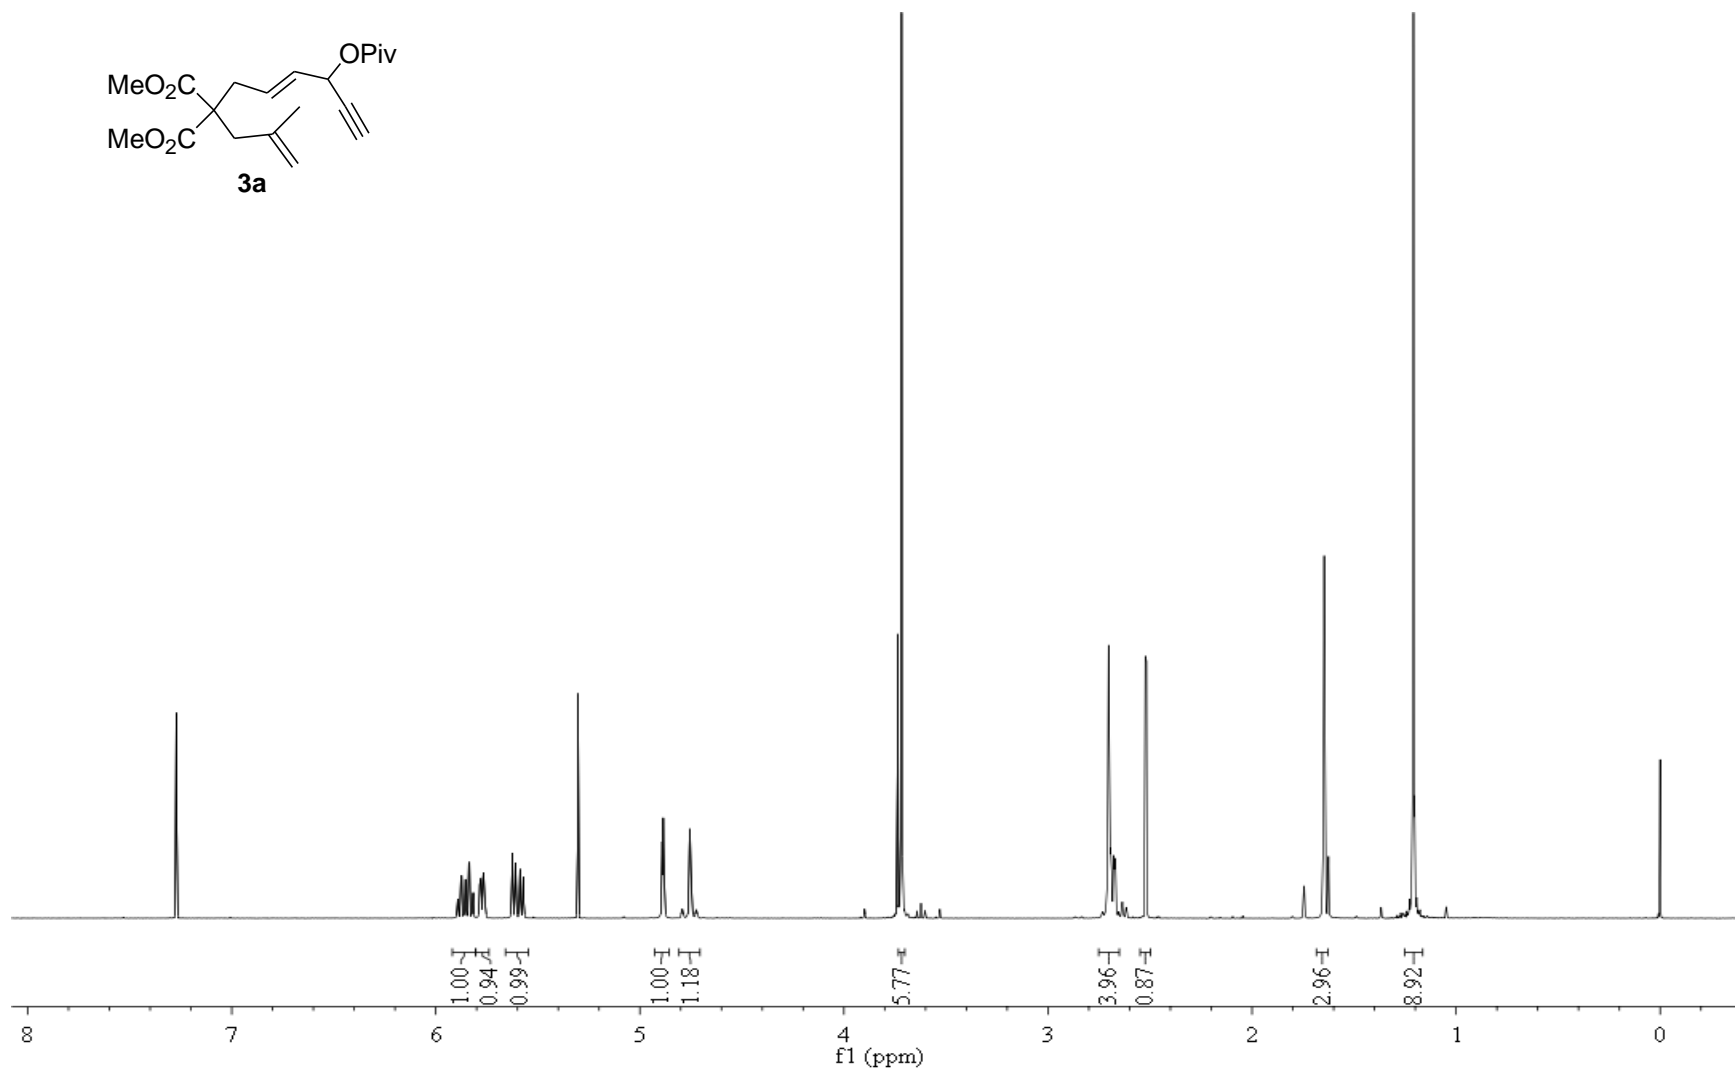

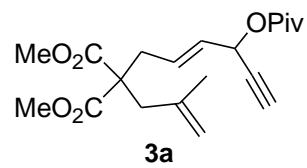

—177.157  
—171.523

—140.393  
—130.131  
—129.258  
—116.235

79.850  
77.579  
77.260  
76.943  
74.795  
63.528  
57.354  
52.675  
52.656

40.803  
38.925  
35.464  
27.216  
23.258

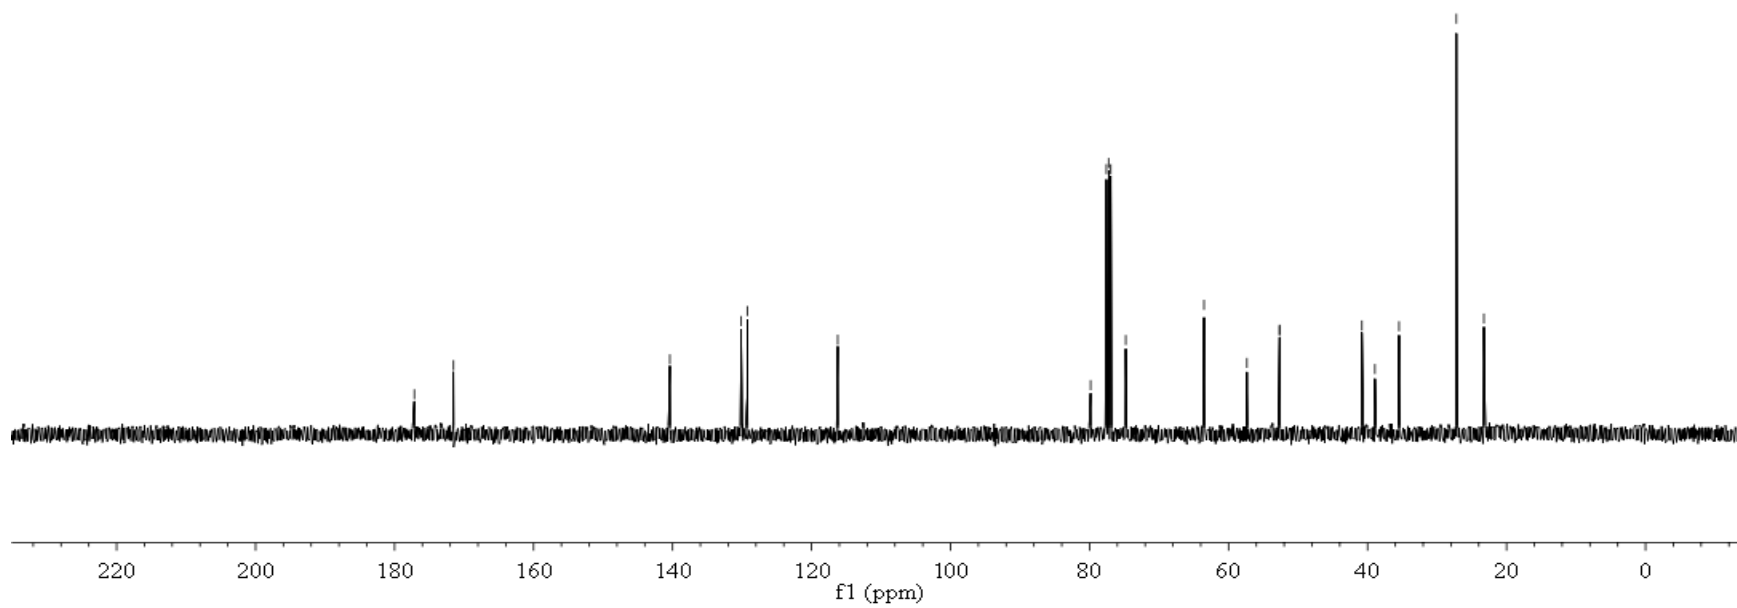

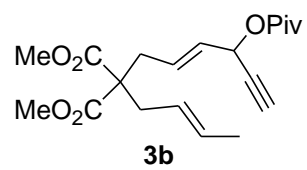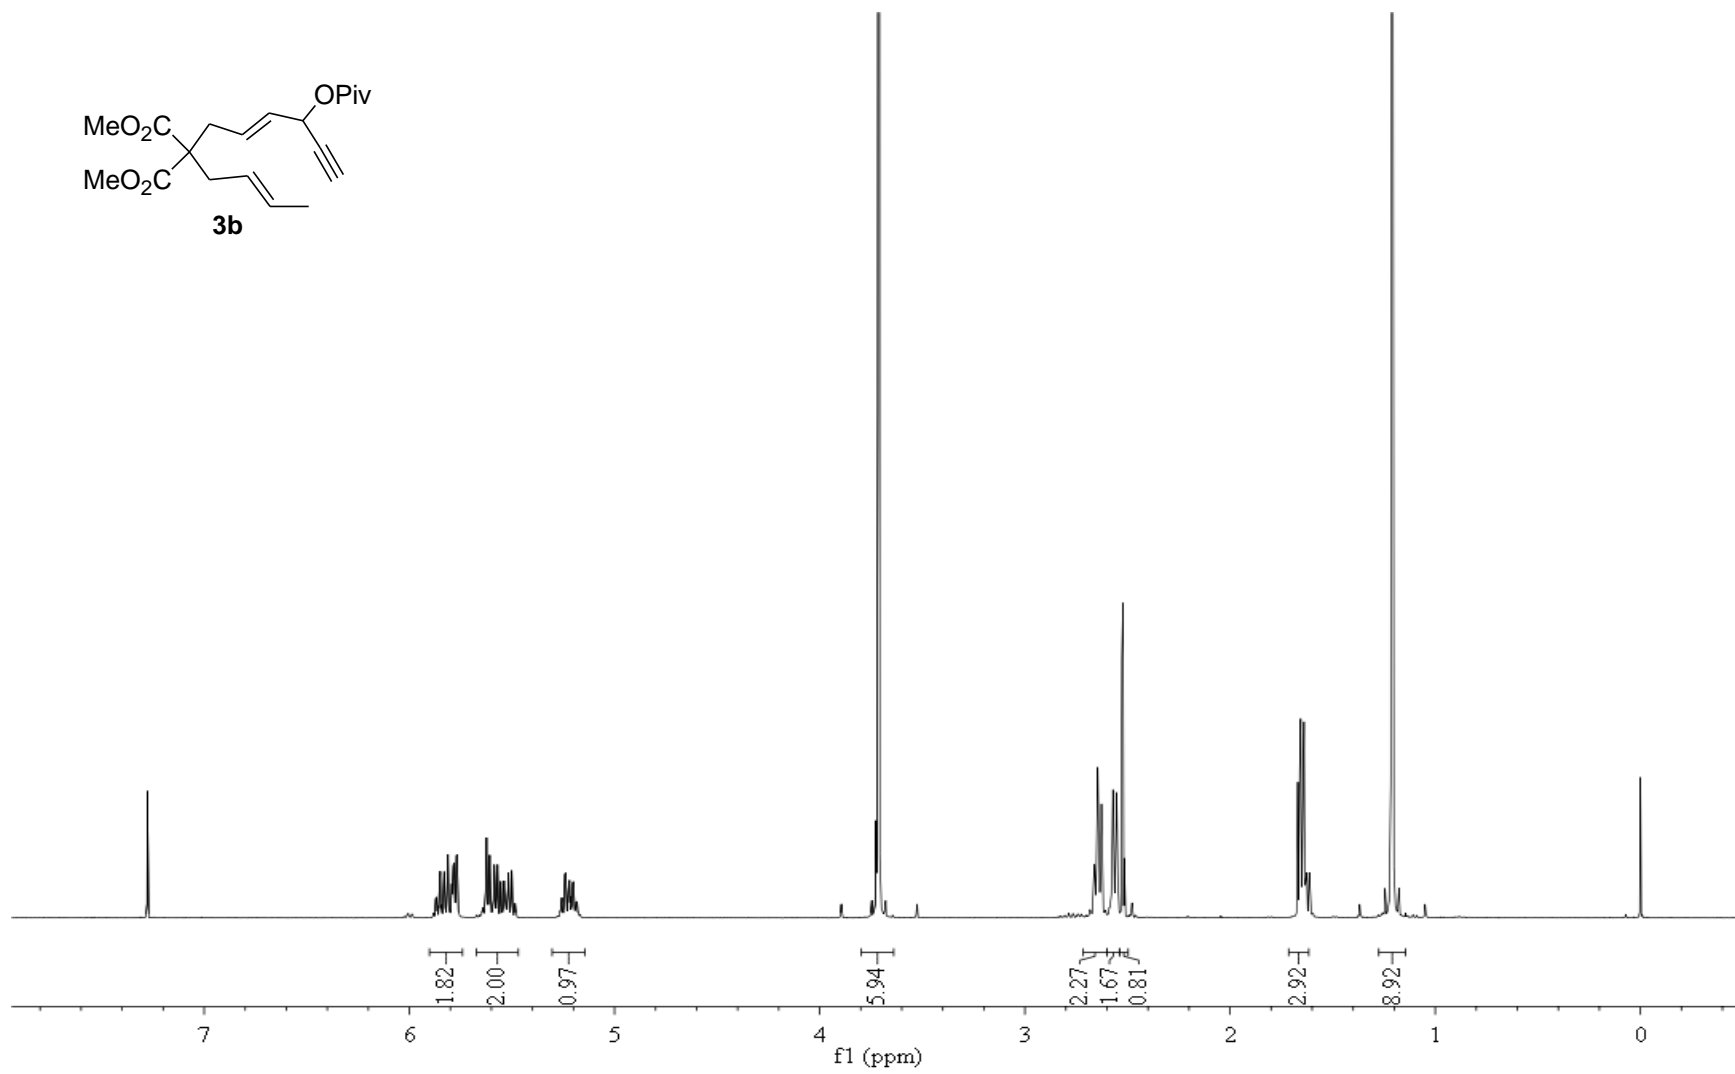



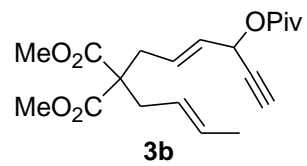

—177.148  
—171.281

130.445  
129.995  
129.203  
124.437

79.835  
77.578  
77.260  
76.942  
74.797  
63.508  
57.953  
52.616

38.922  
36.183  
35.358  
27.199  
—18.253

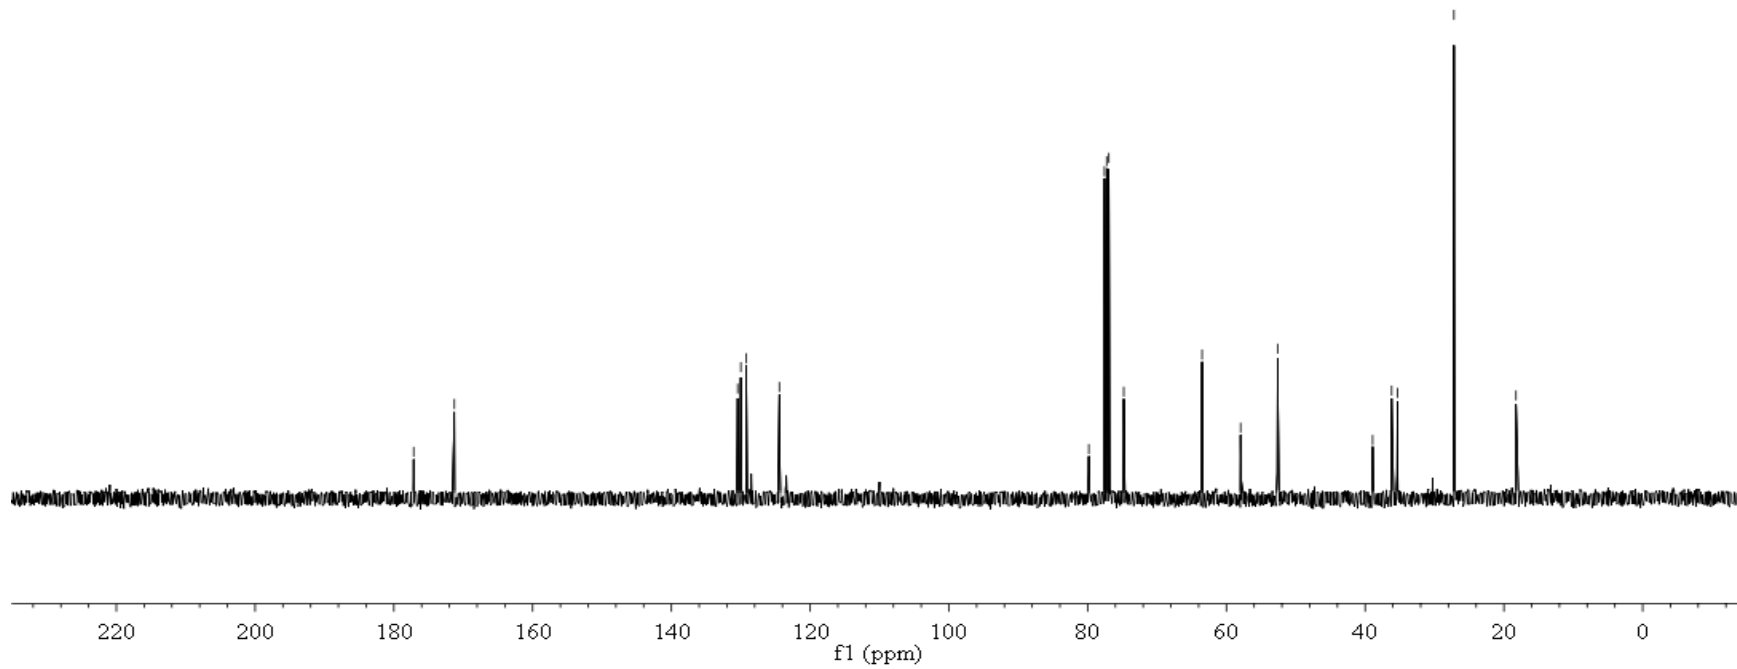

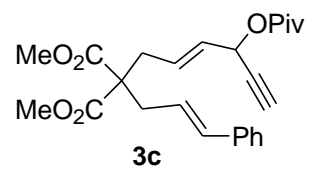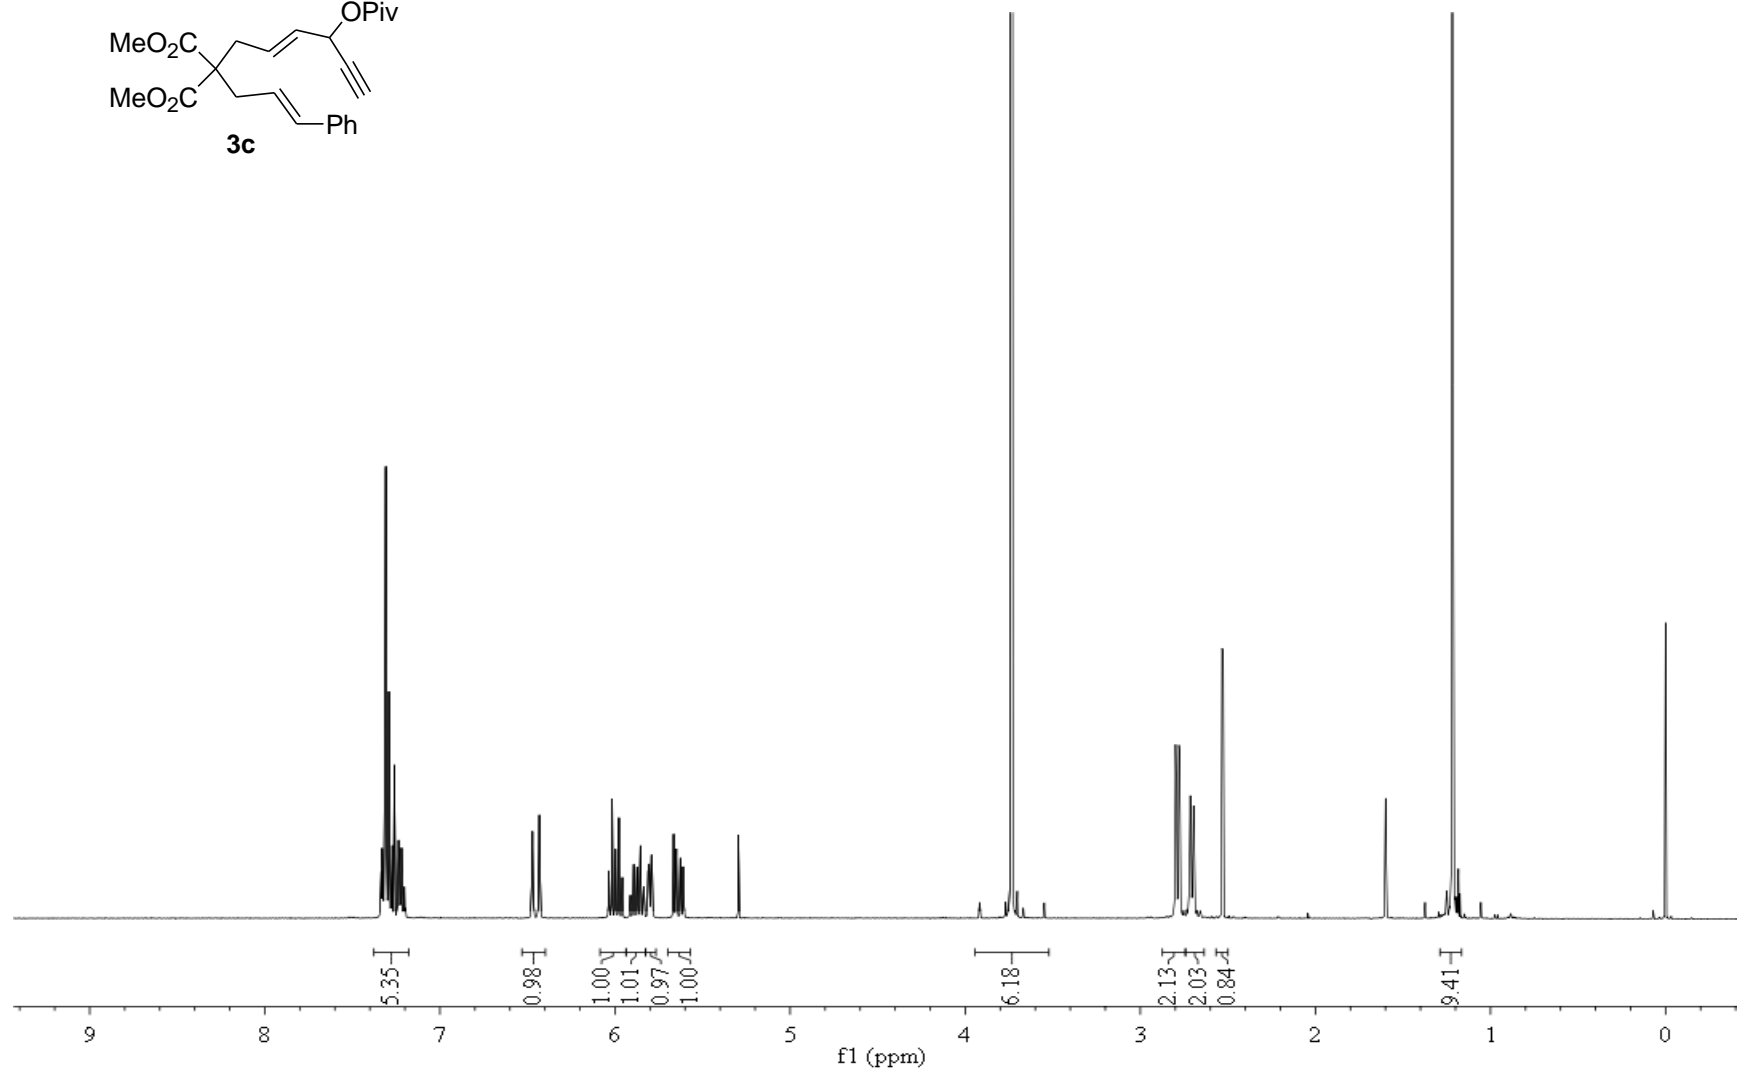

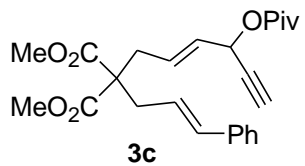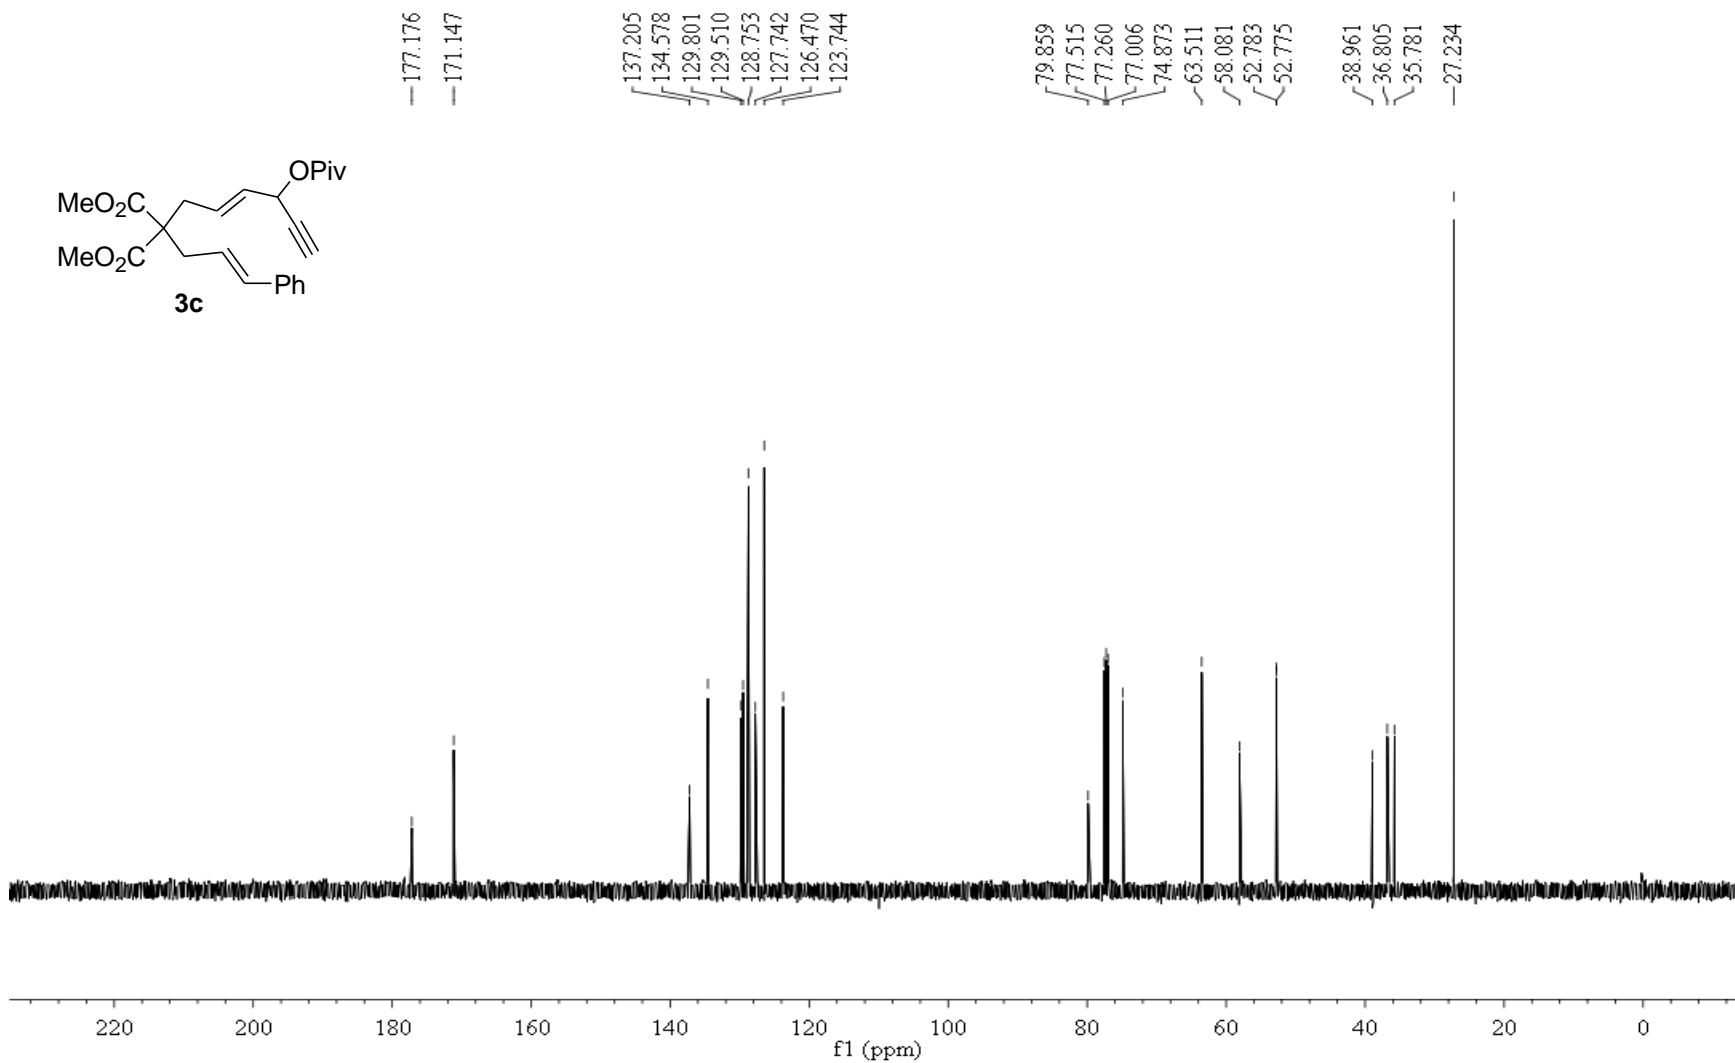

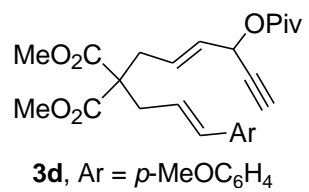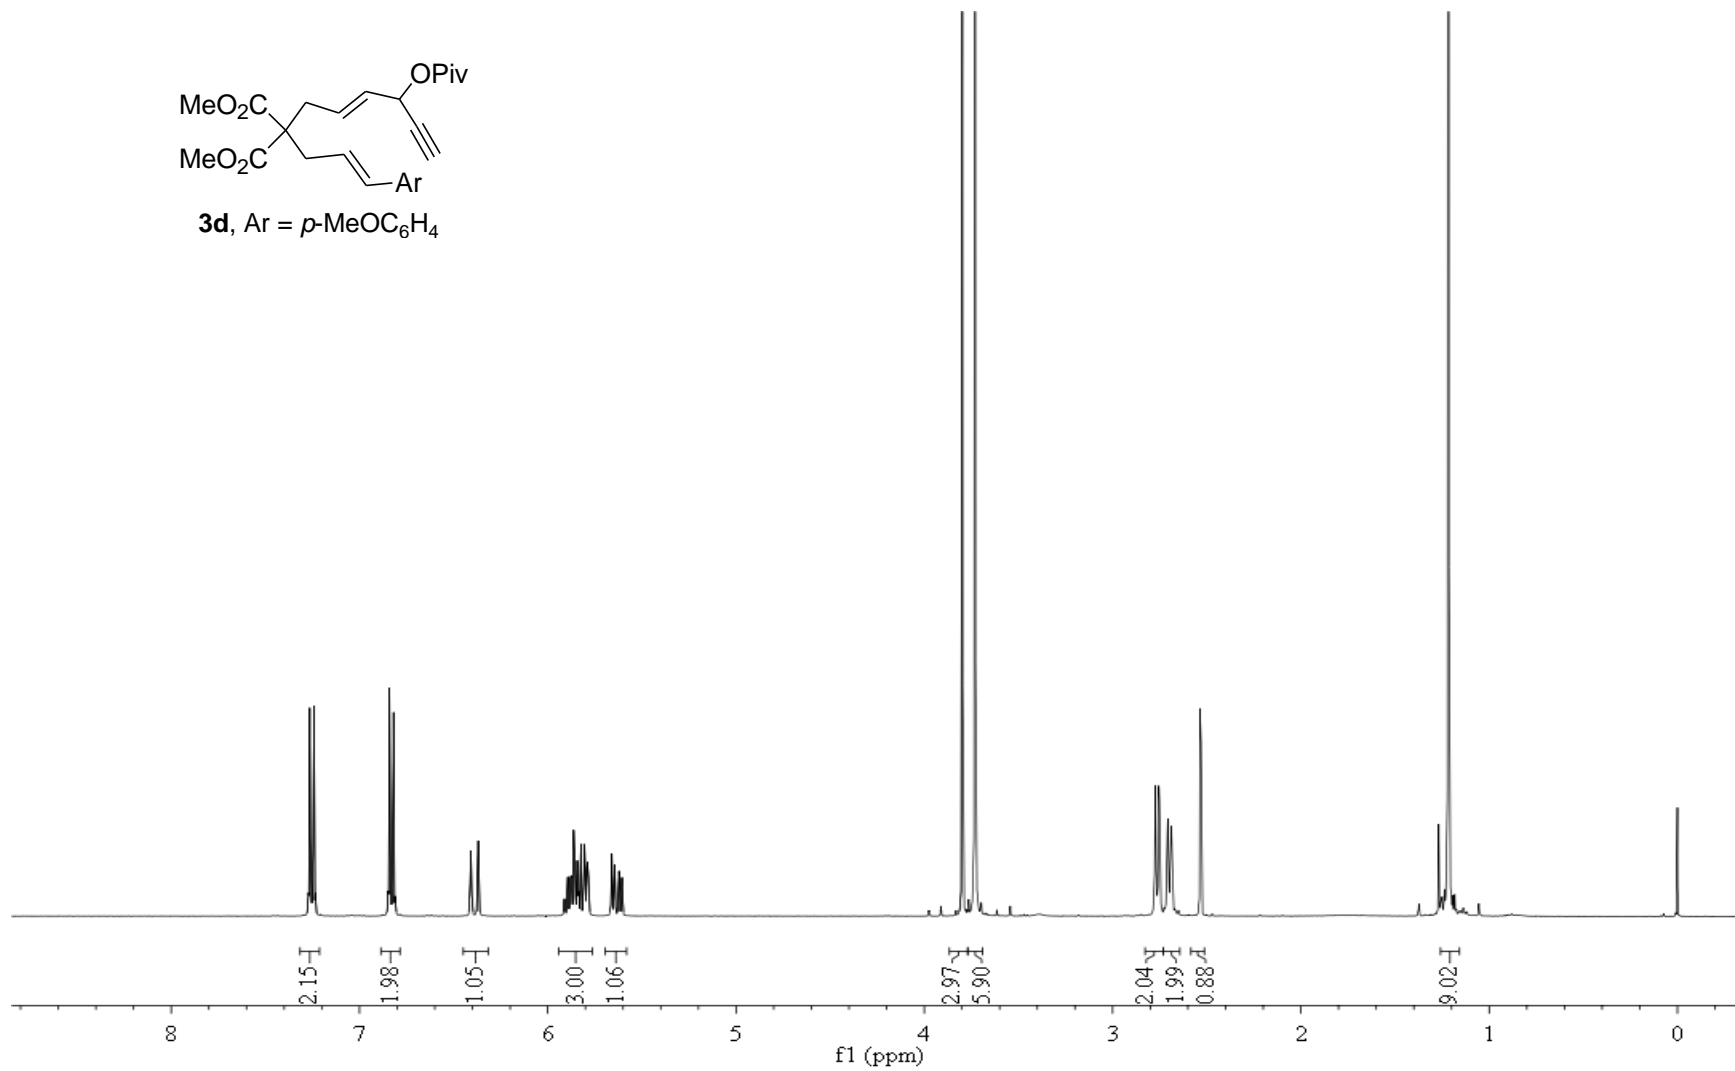

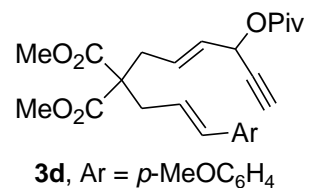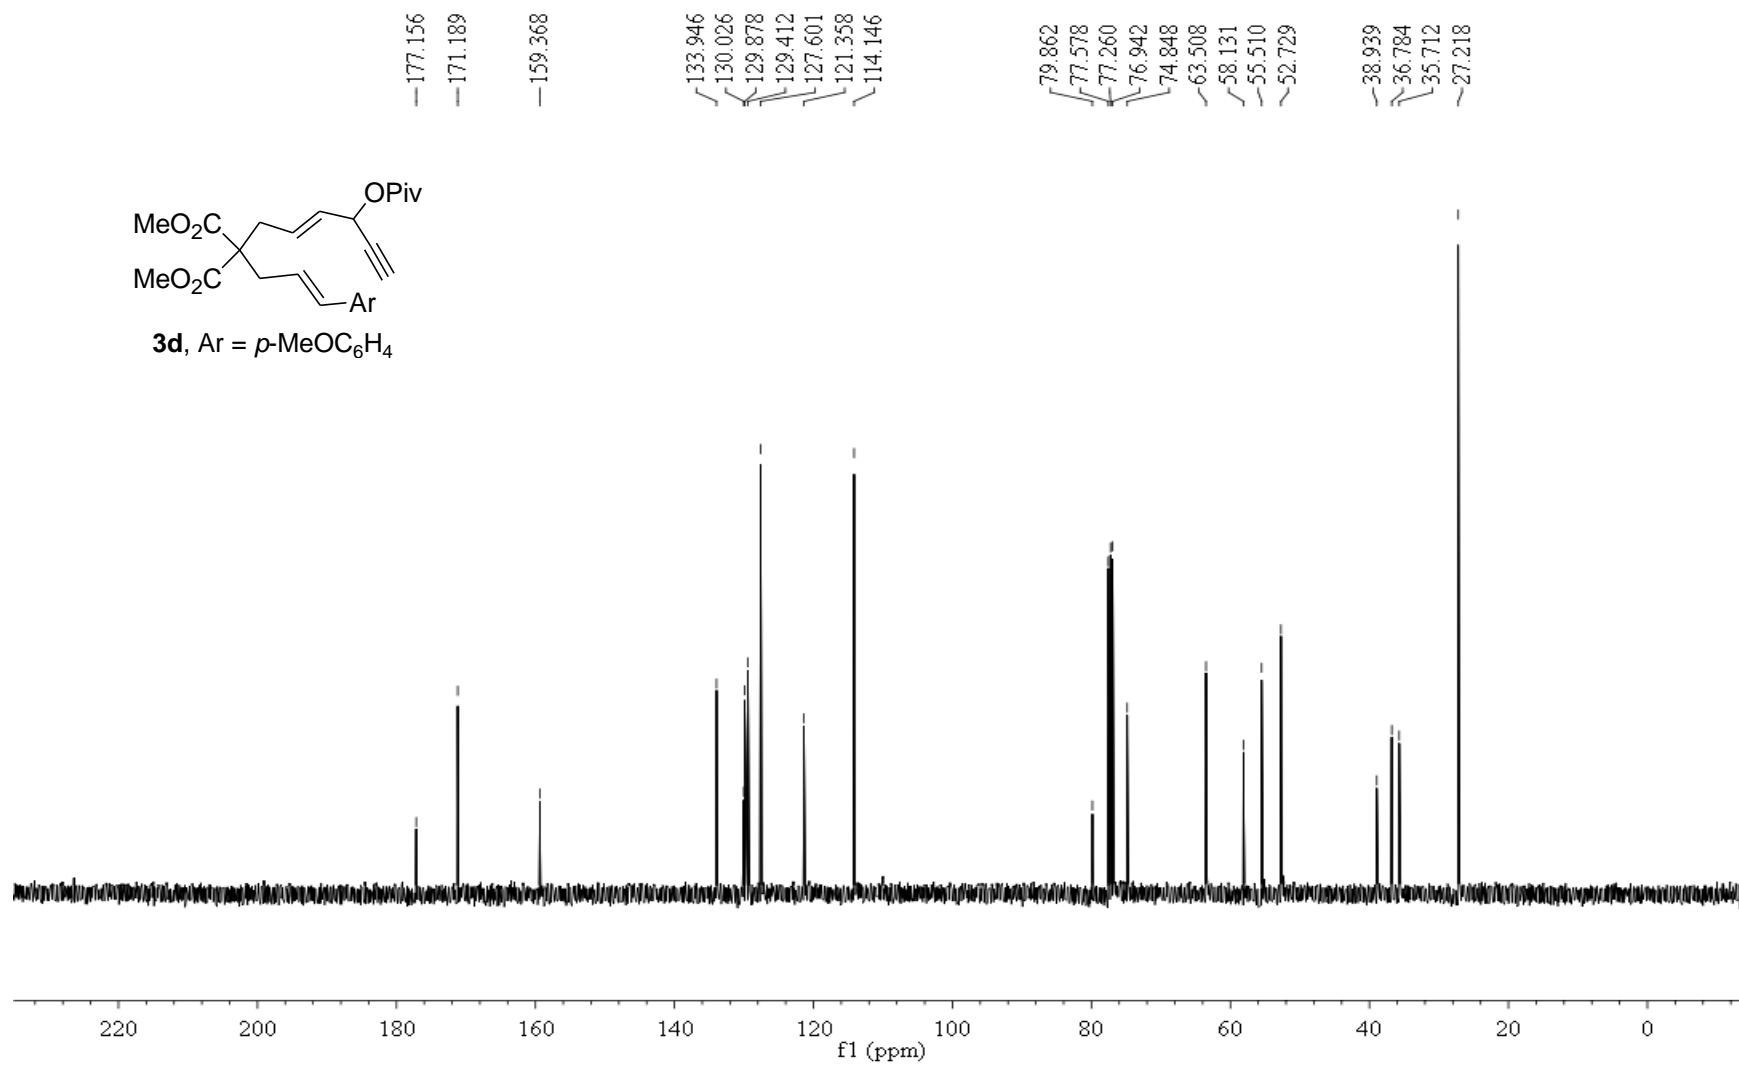

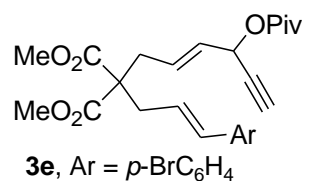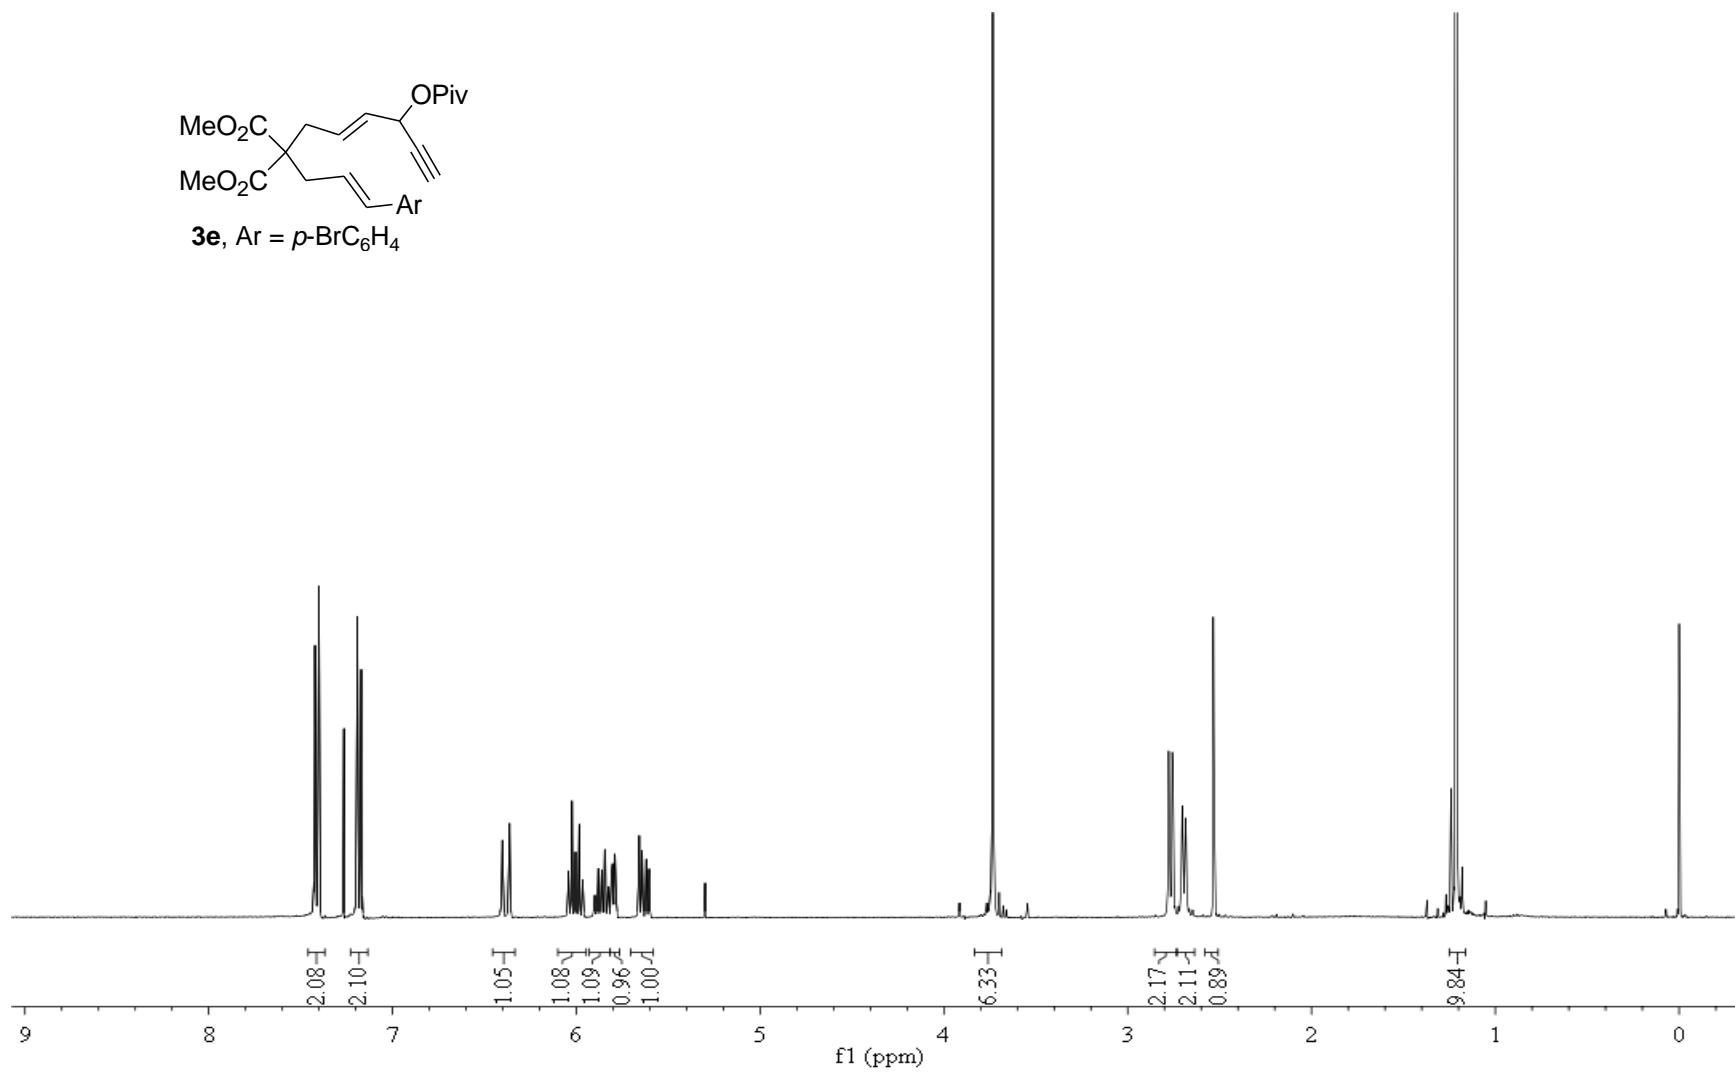

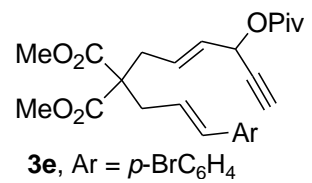

—177.173  
—171.069

136.102  
133.352  
131.858  
129.675  
129.598  
127.995  
124.743  
121.504

79.830  
77.578  
77.260  
76.942  
74.899  
63.485  
57.999  
52.815

38.961  
36.843  
35.885  
—27.230

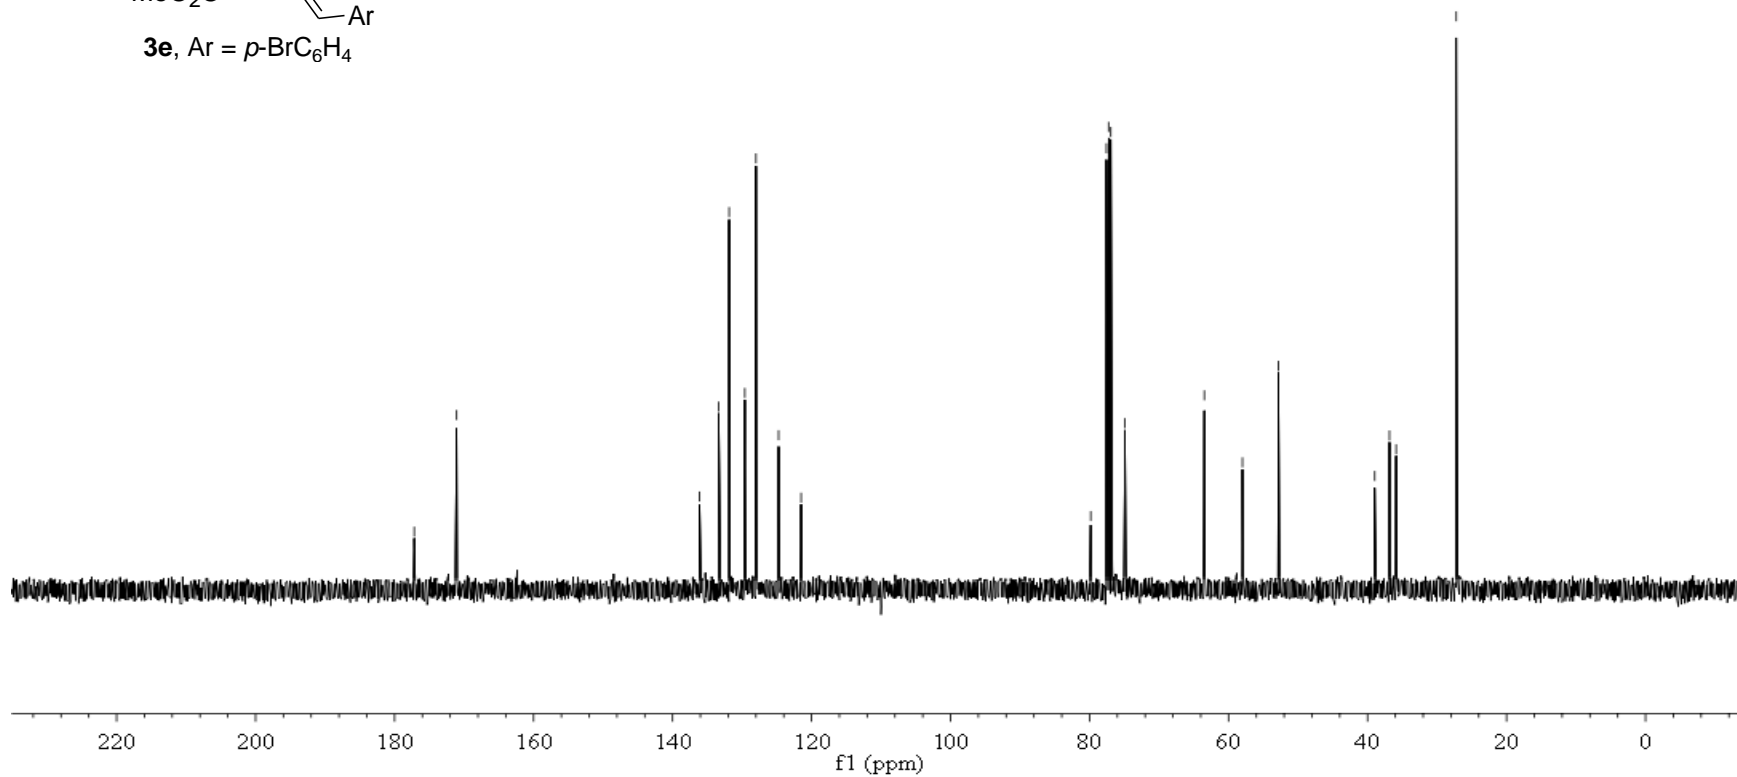

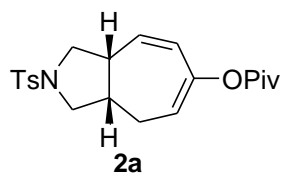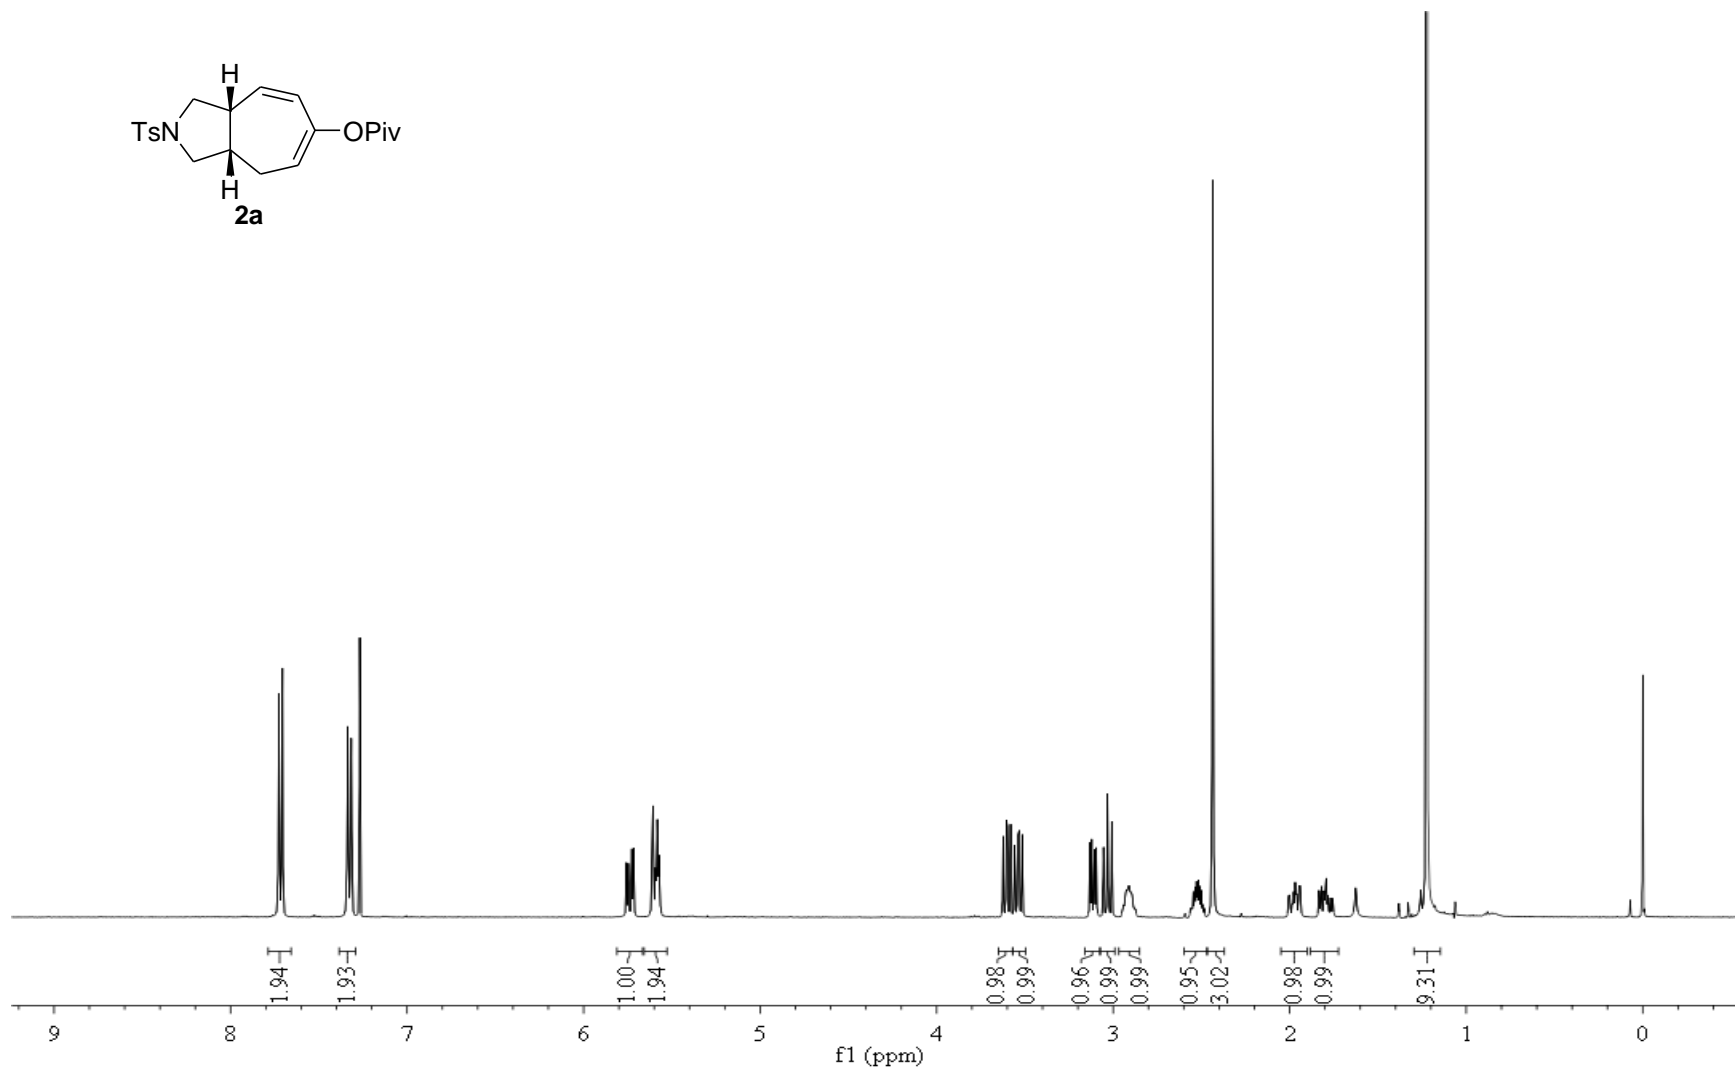



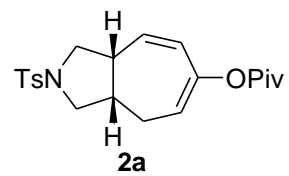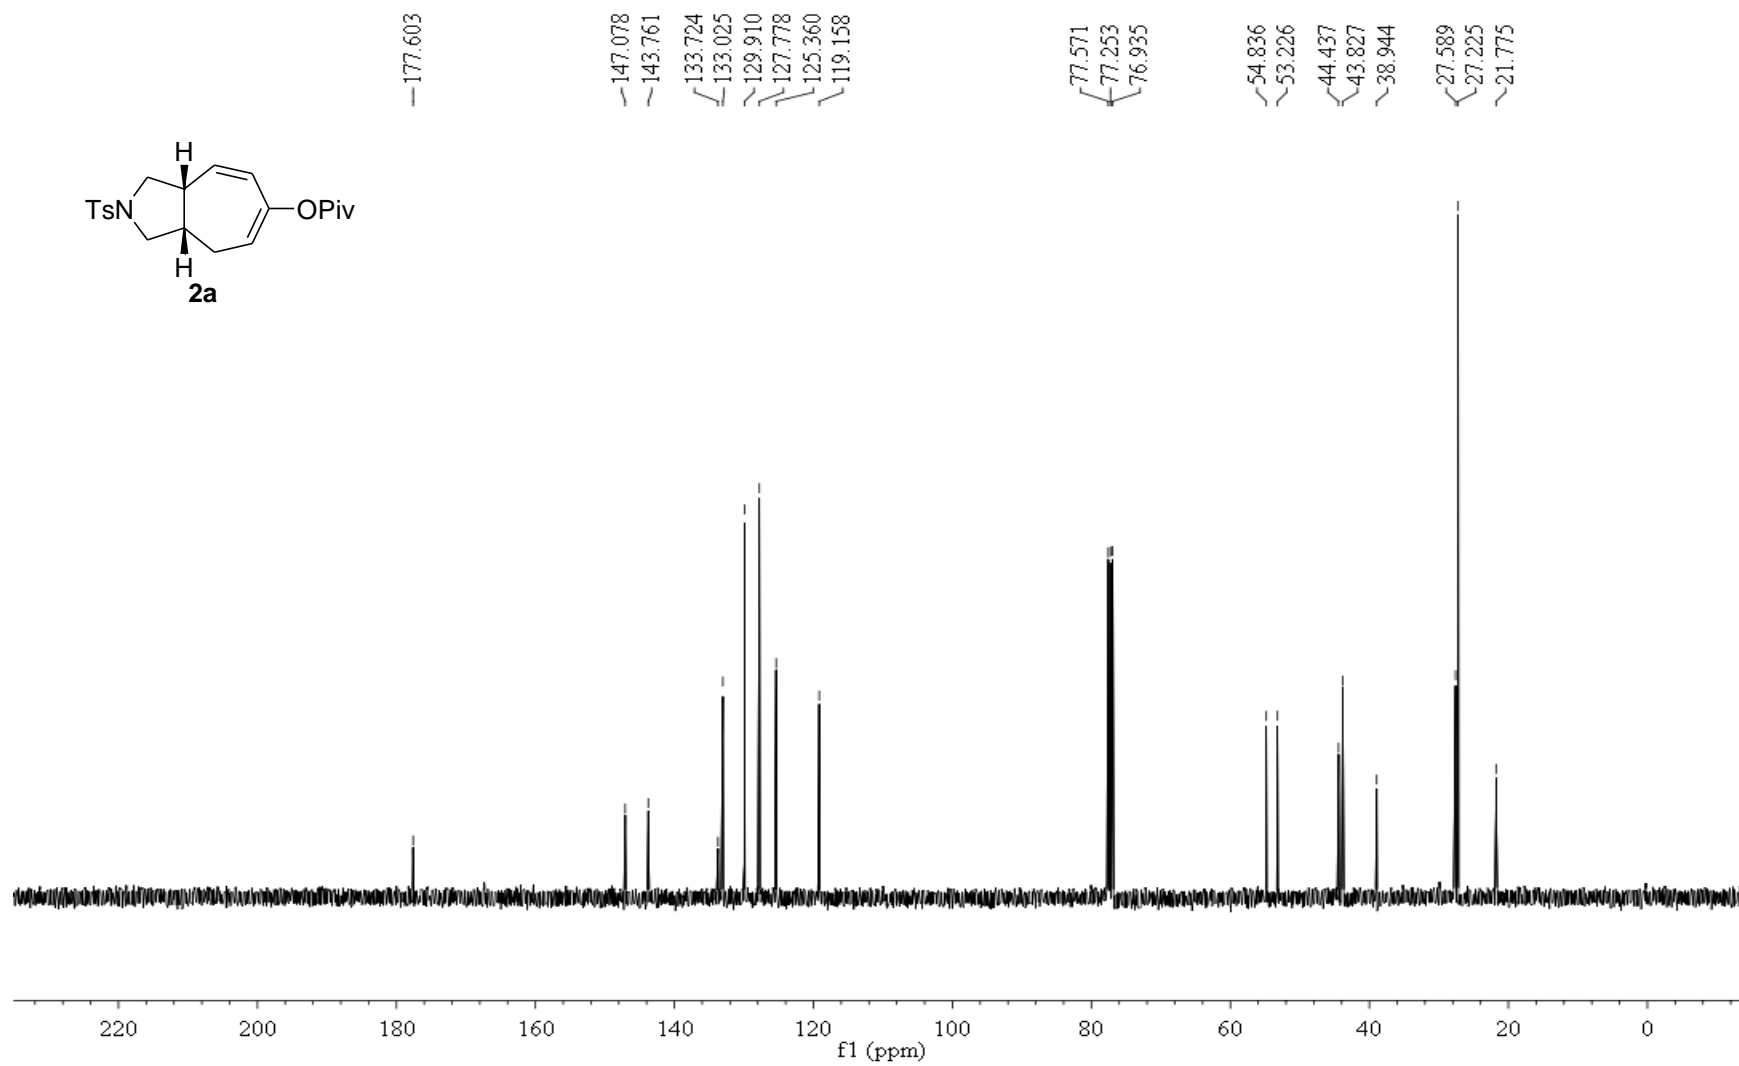

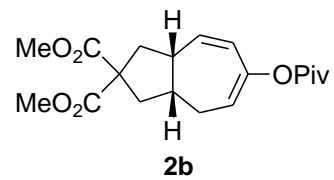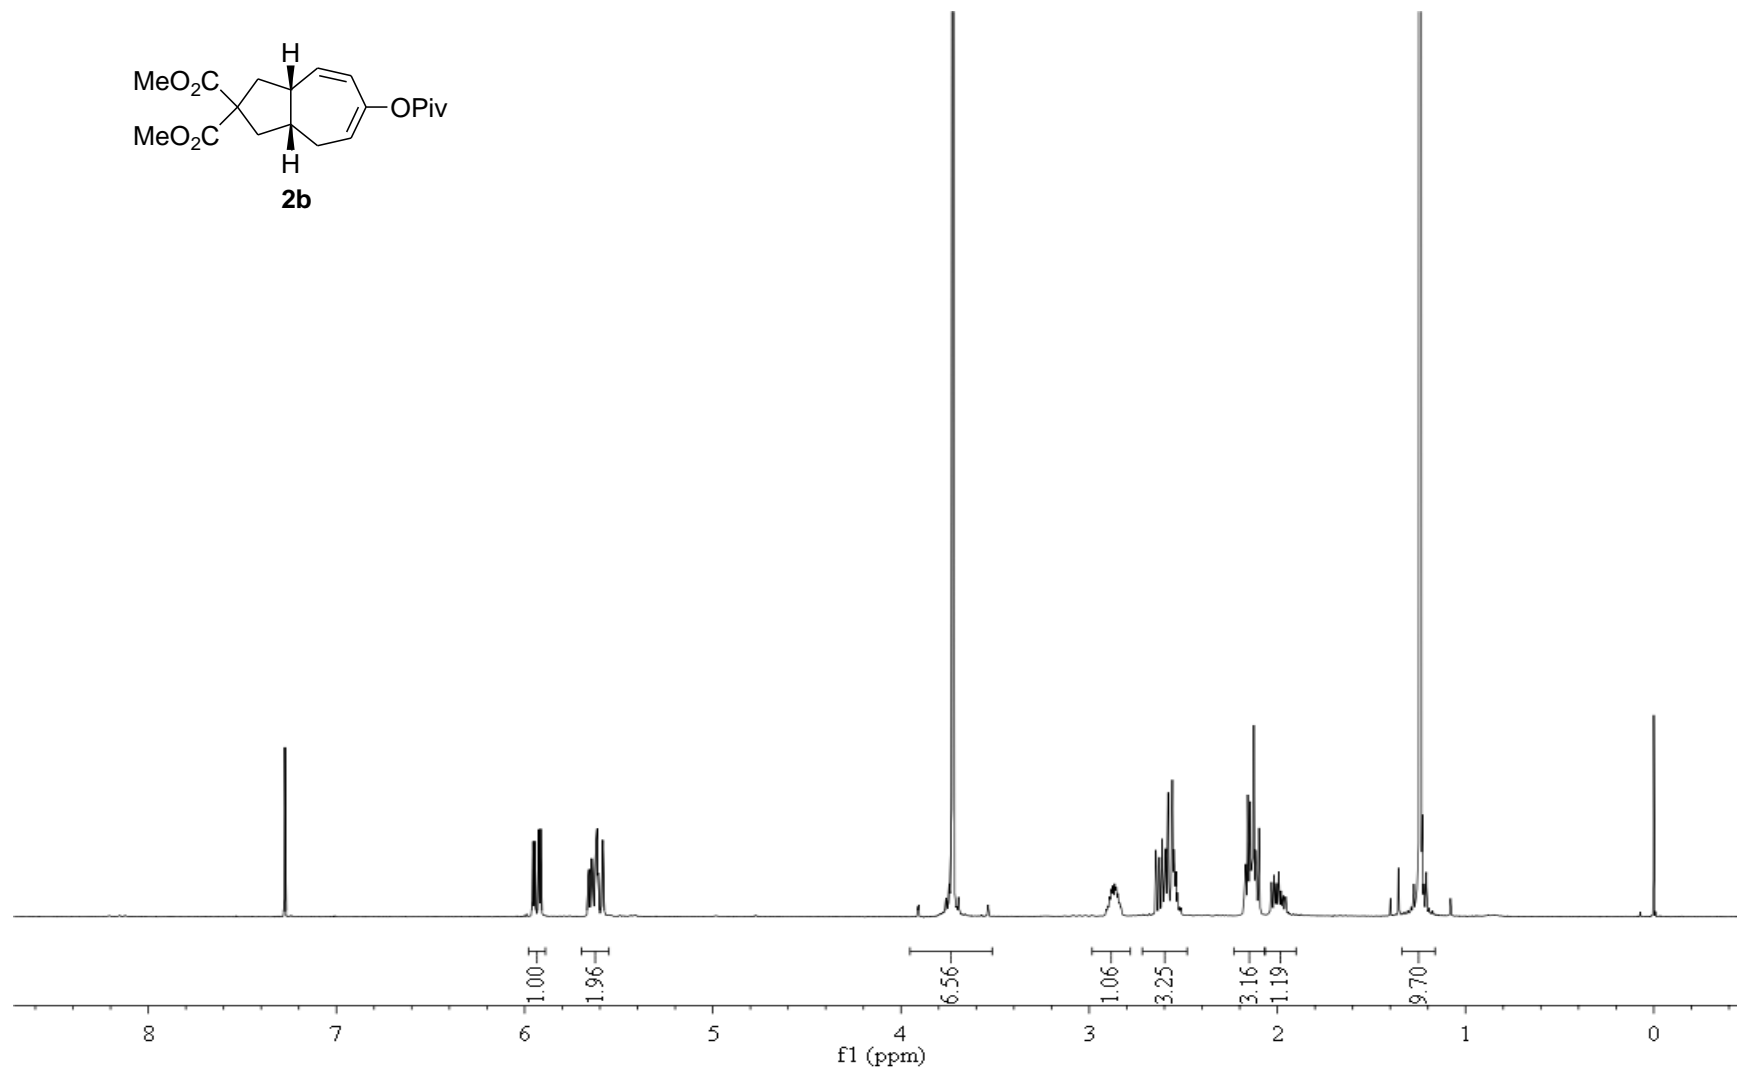

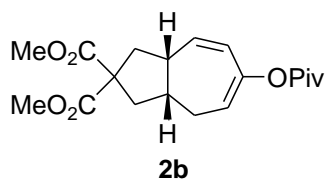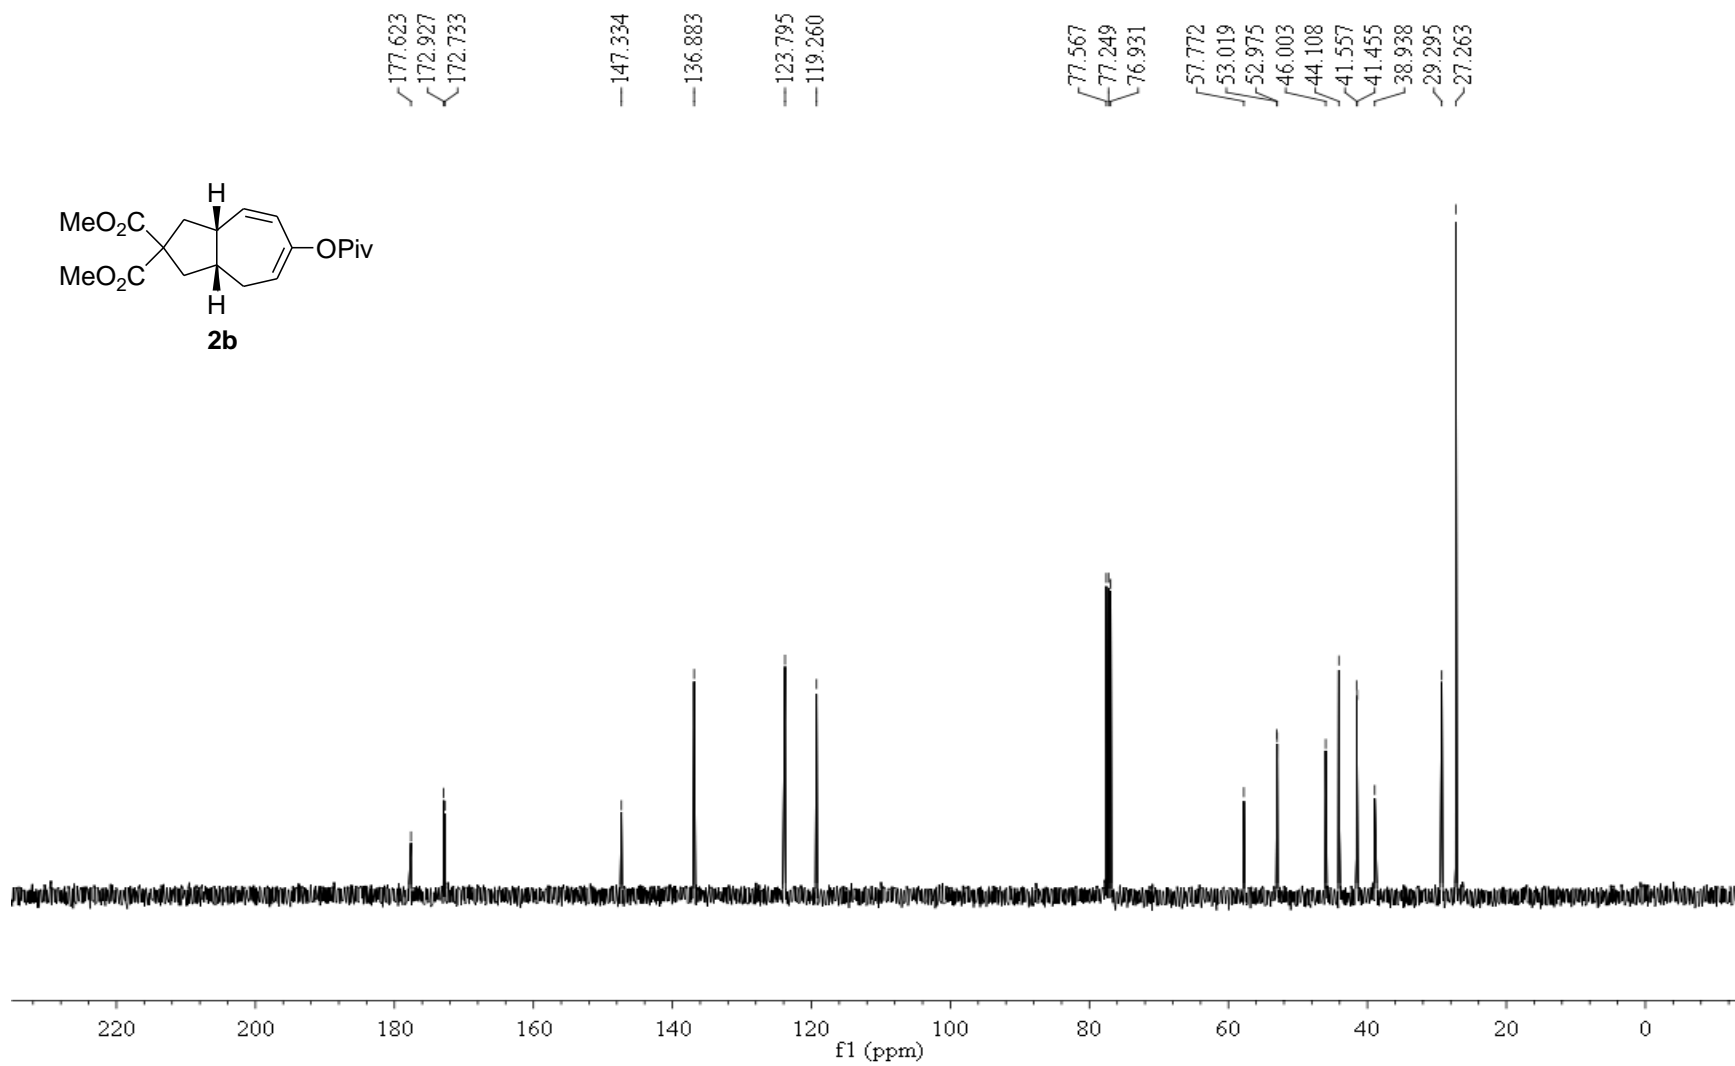

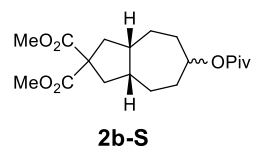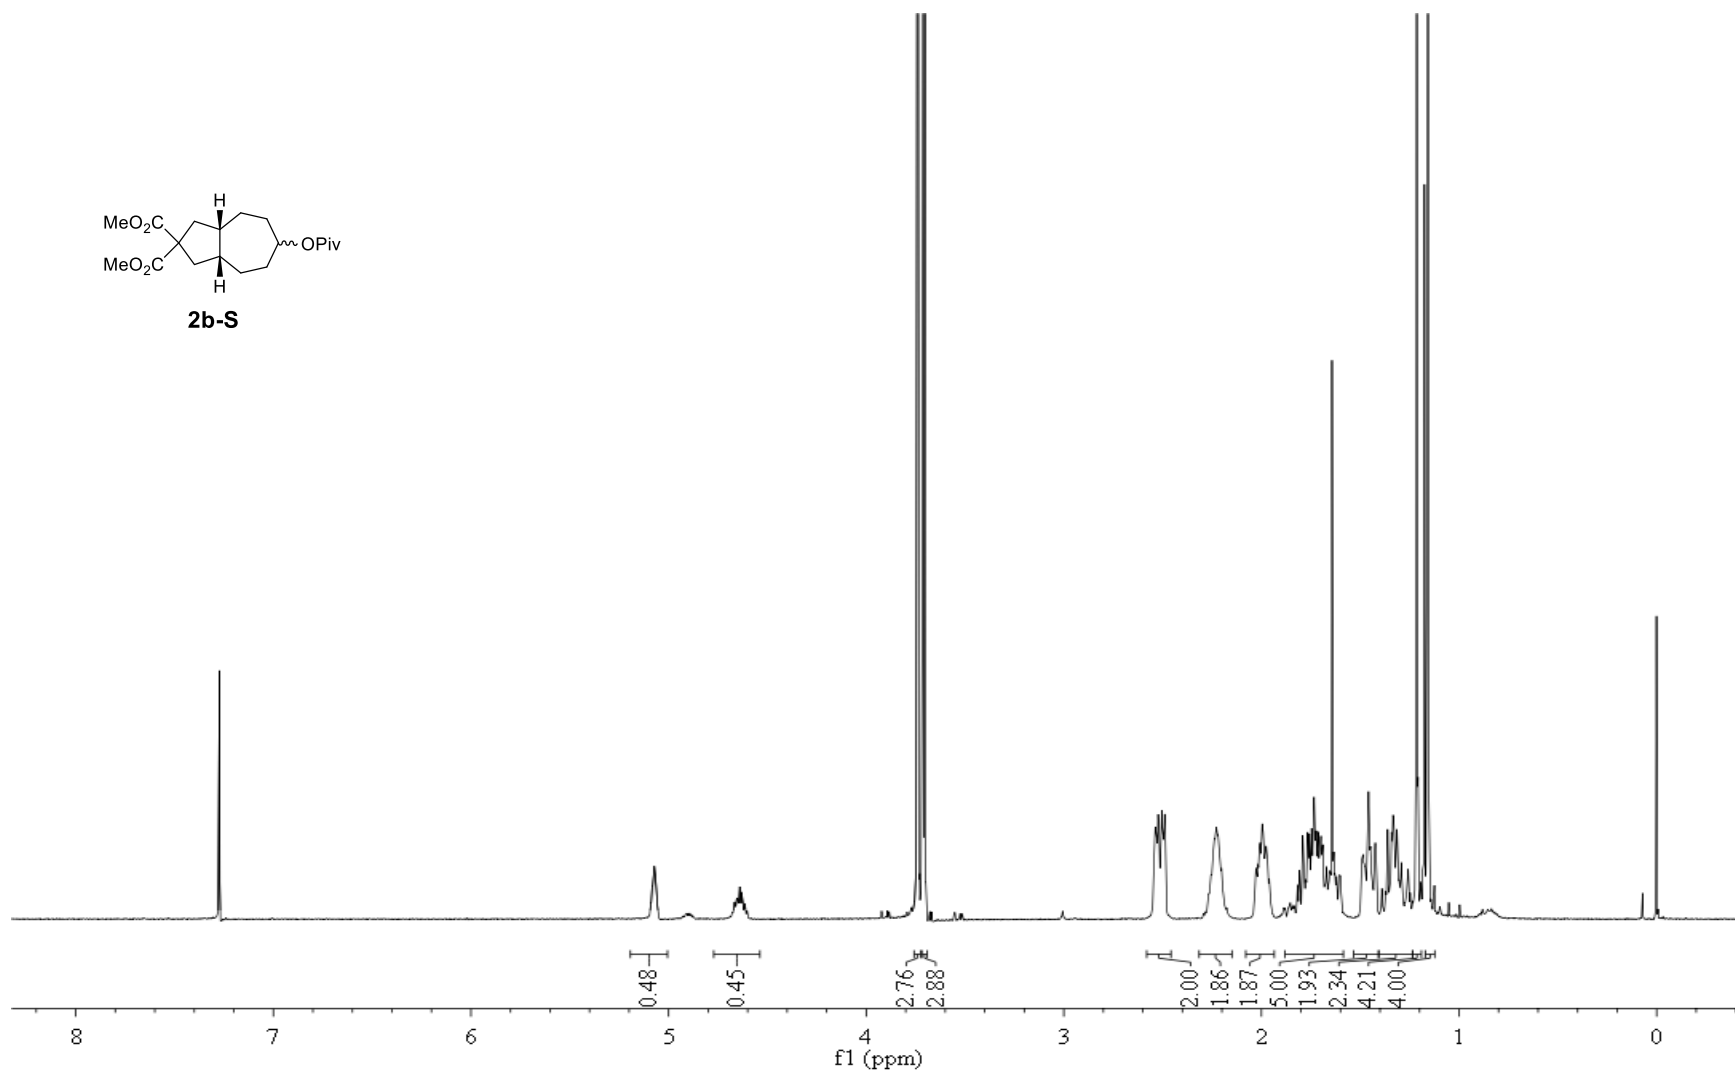

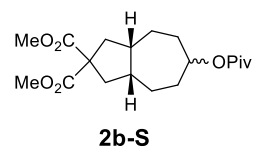

178.018  
177.956  
172.677  
172.664  
172.606  
172.546

77.578  
77.260  
76.942  
75.761  
71.472  
60.594  
59.830  
52.869  
52.815  
42.316  
41.671  
41.201  
39.192  
38.818  
34.344  
33.229  
27.450  
27.384  
27.337  
26.746  
25.289

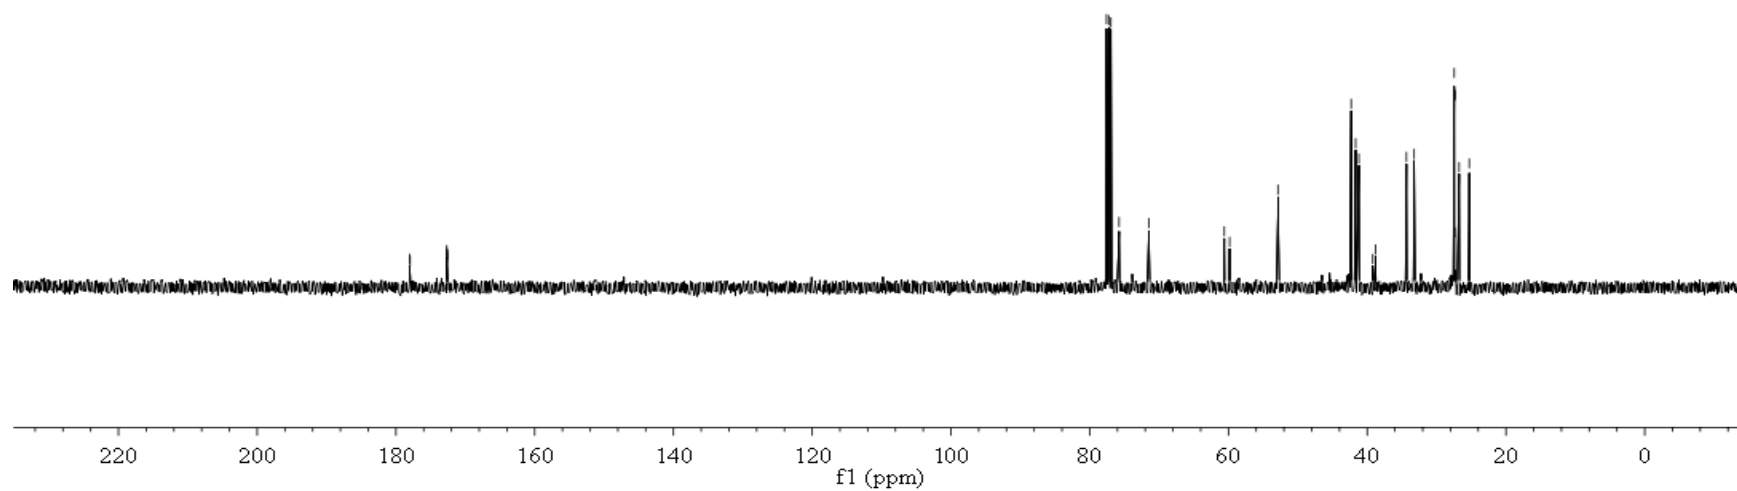

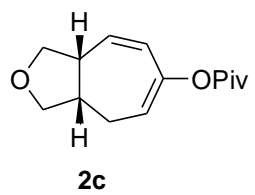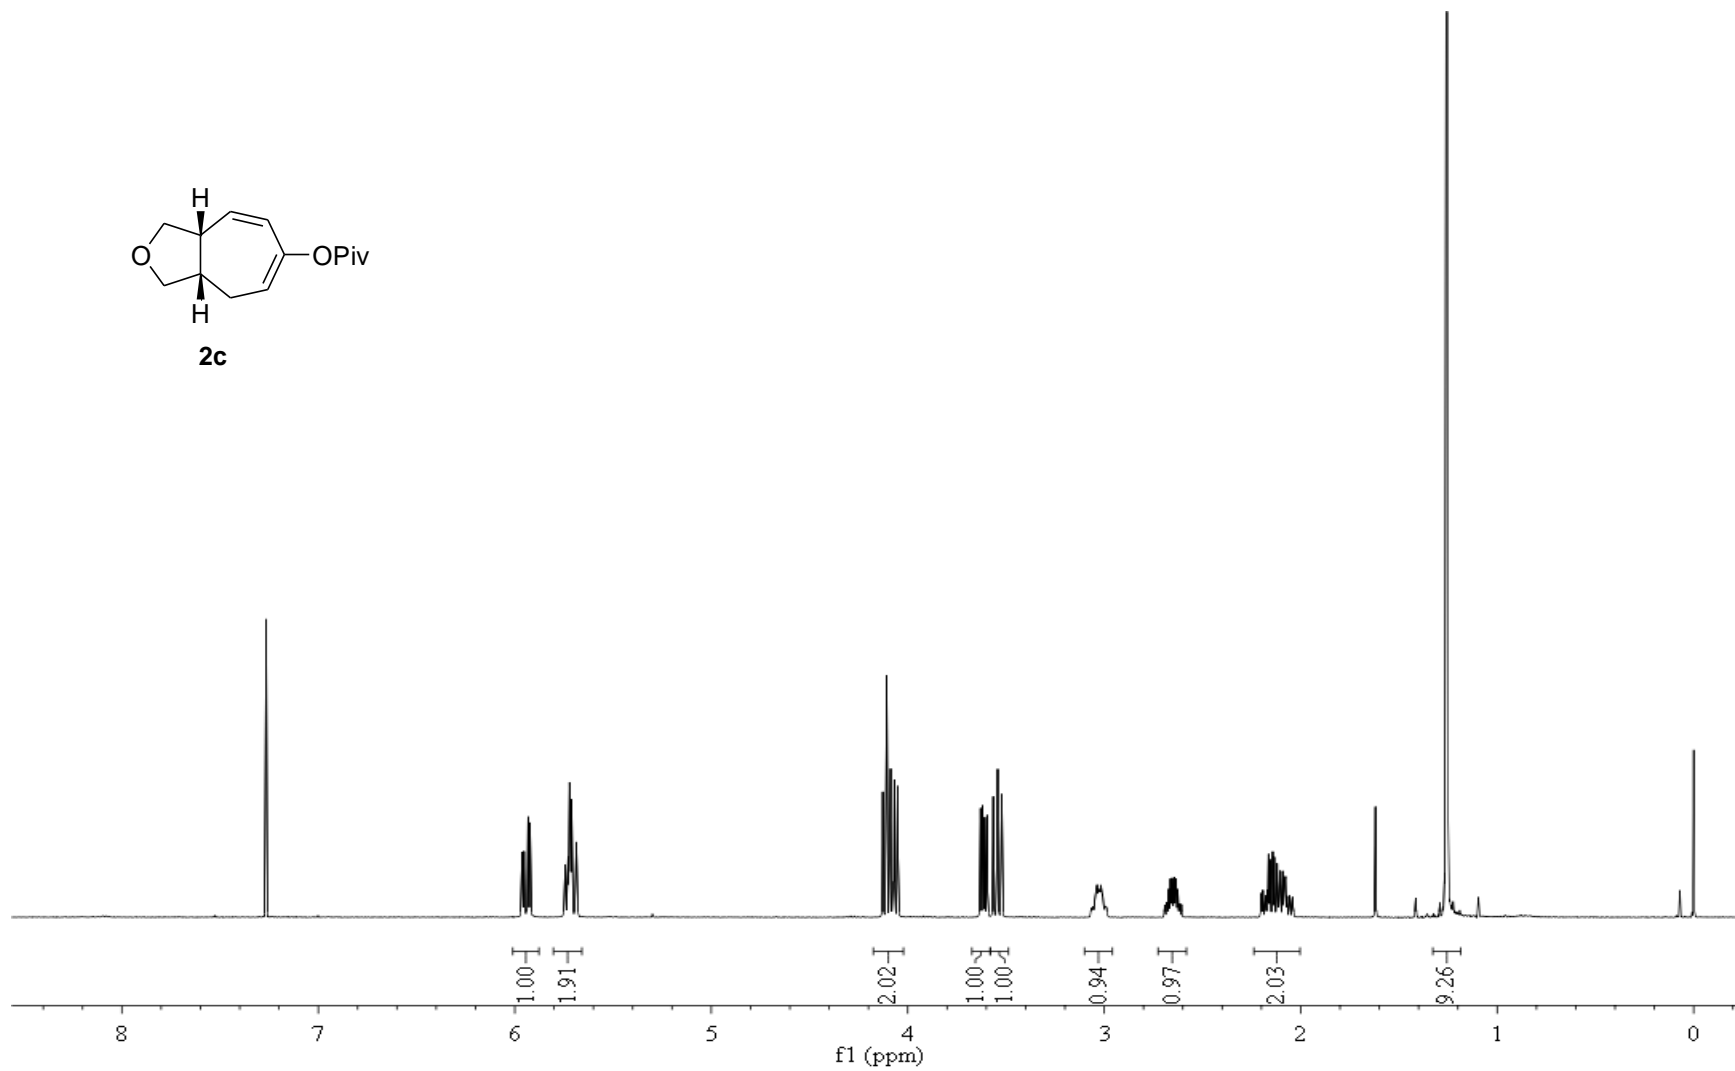

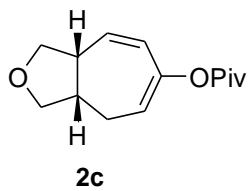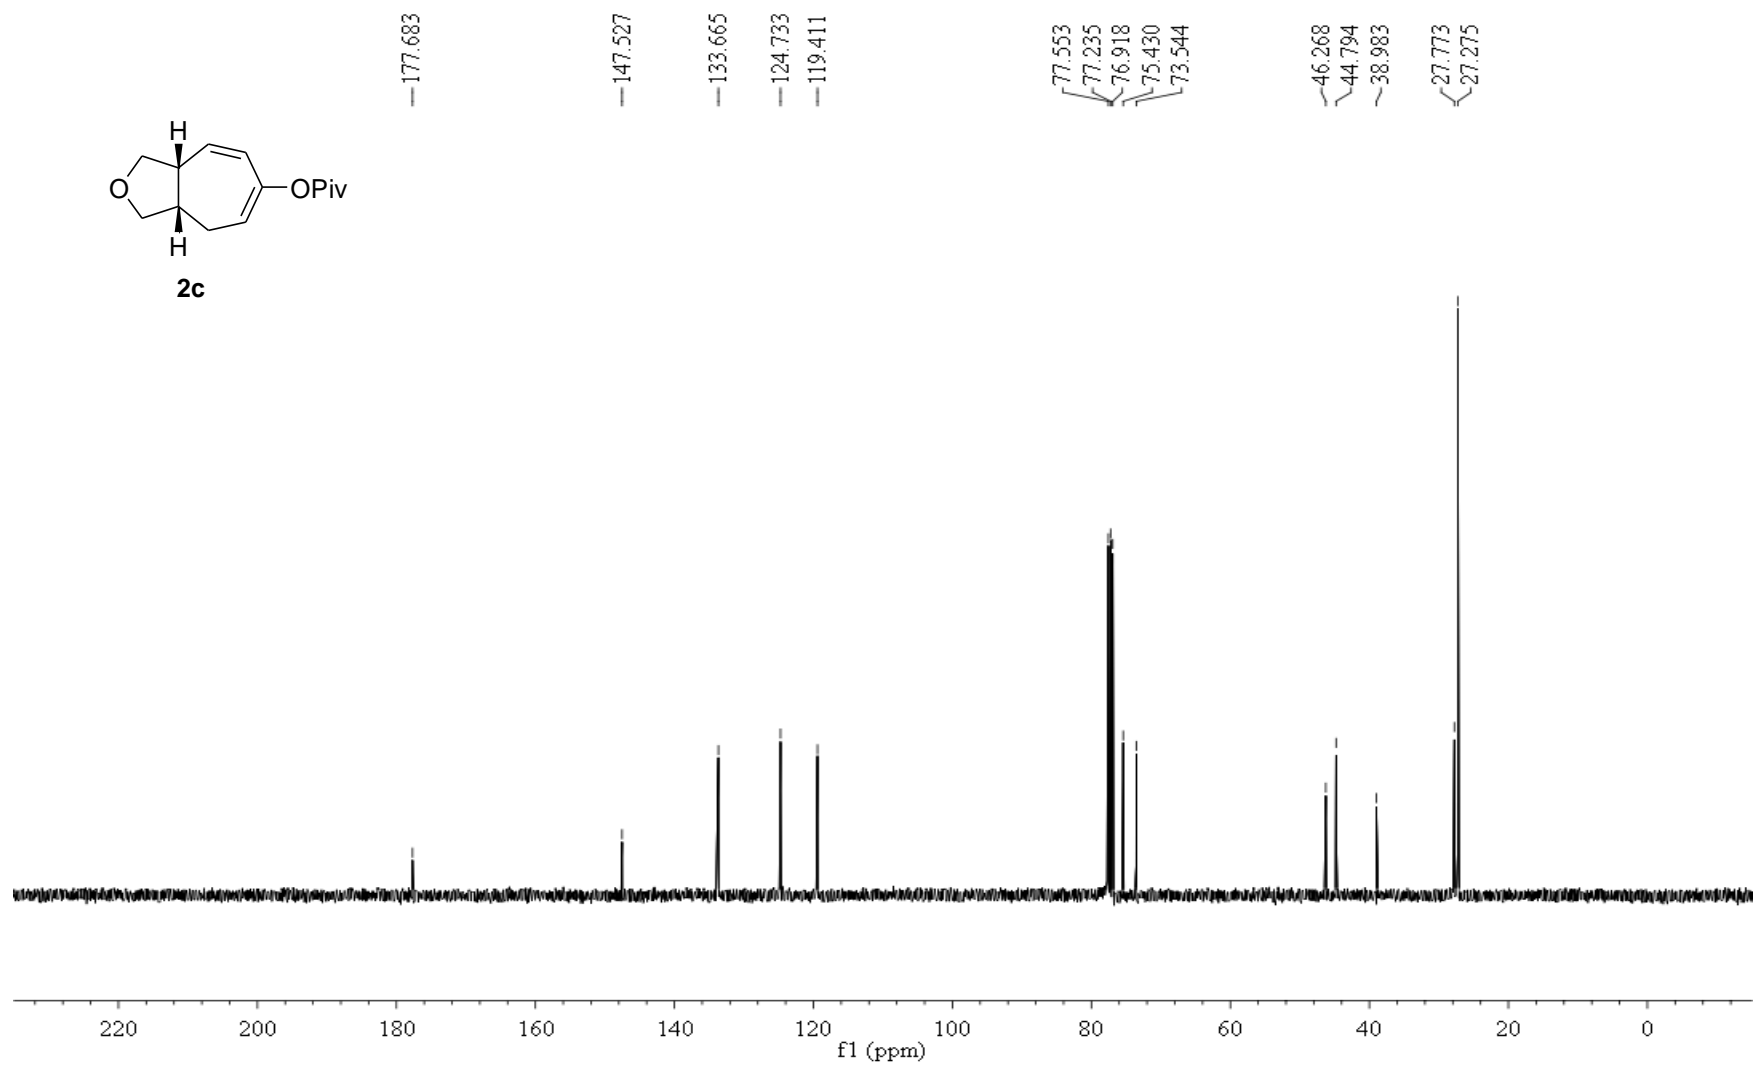

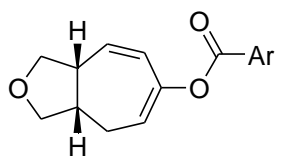

**2d** (Ar = *p*-Me<sub>2</sub>N)

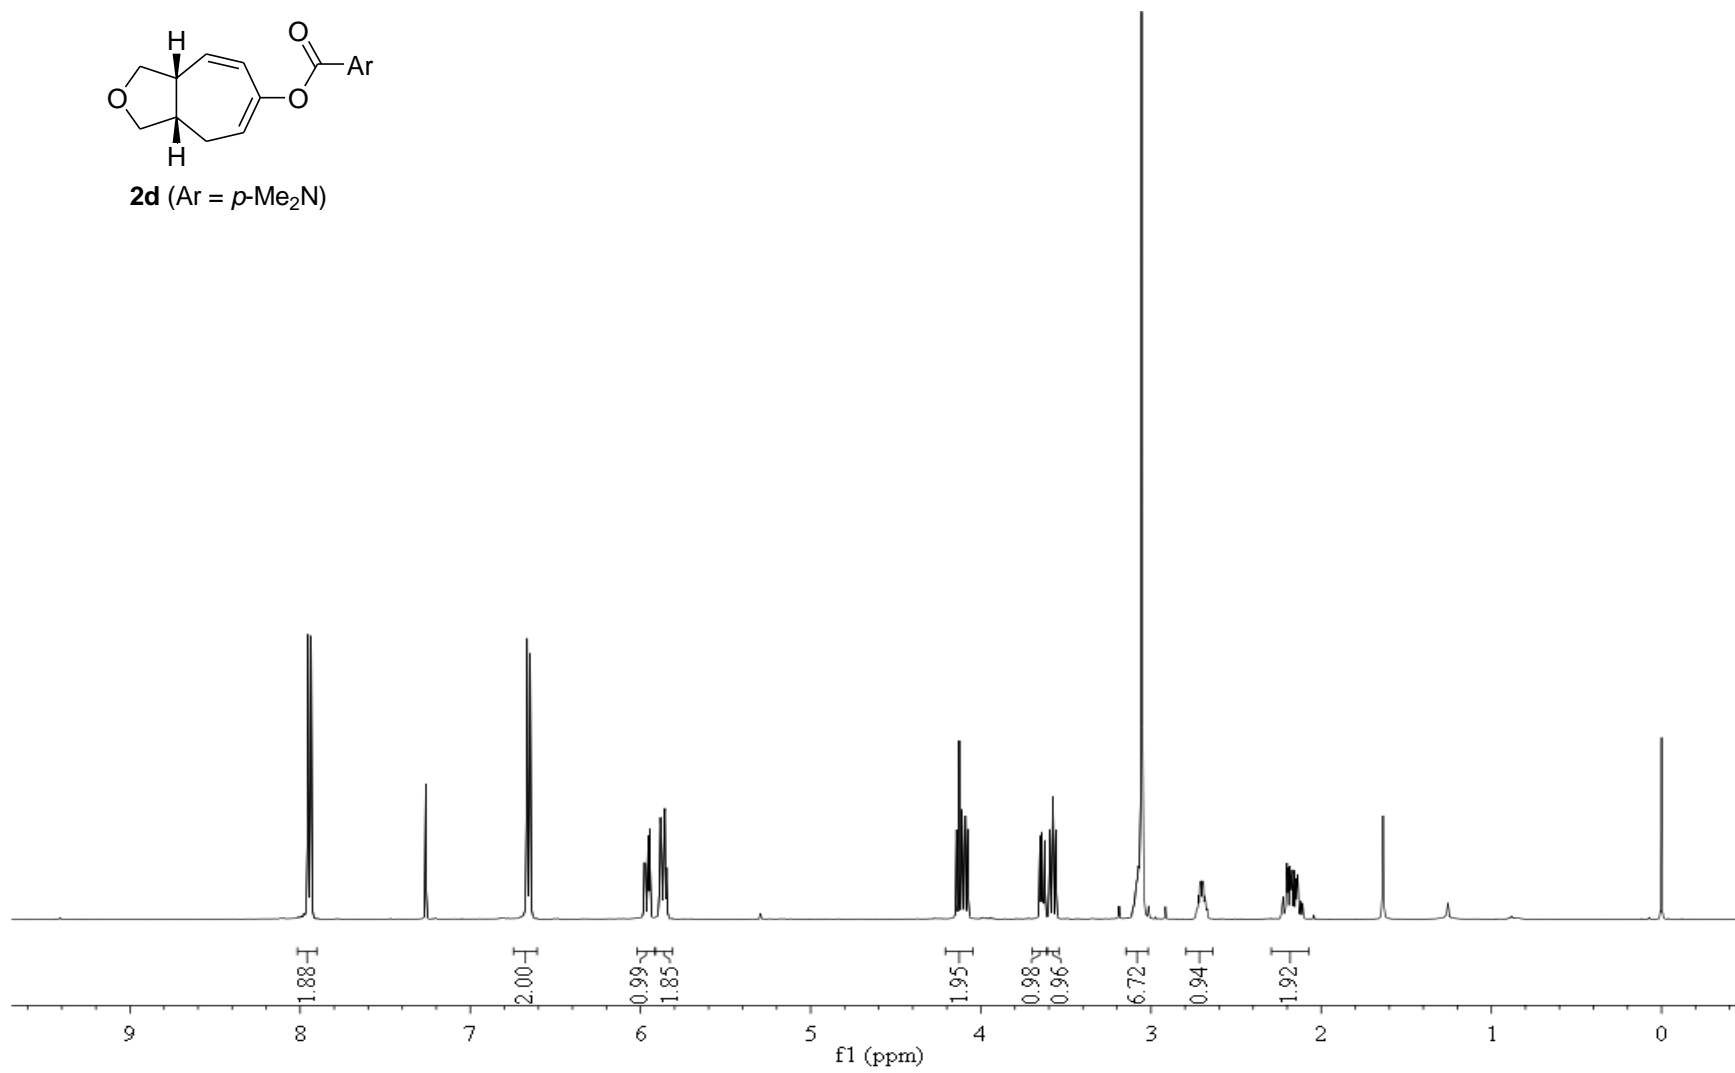



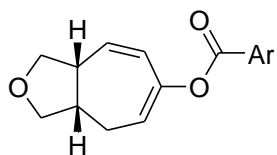

**2d** (Ar = *p*-Me<sub>2</sub>N)

- 166.074
- 153.847
- 147.822
- 133.324
- 132.013
- 125.448
- 119.690
- 116.433
- 110.985
- 77.560
- 77.305
- 77.051
- 75.558
- 73.691
- 46.438
- 44.896
- 40.332
- 27.979

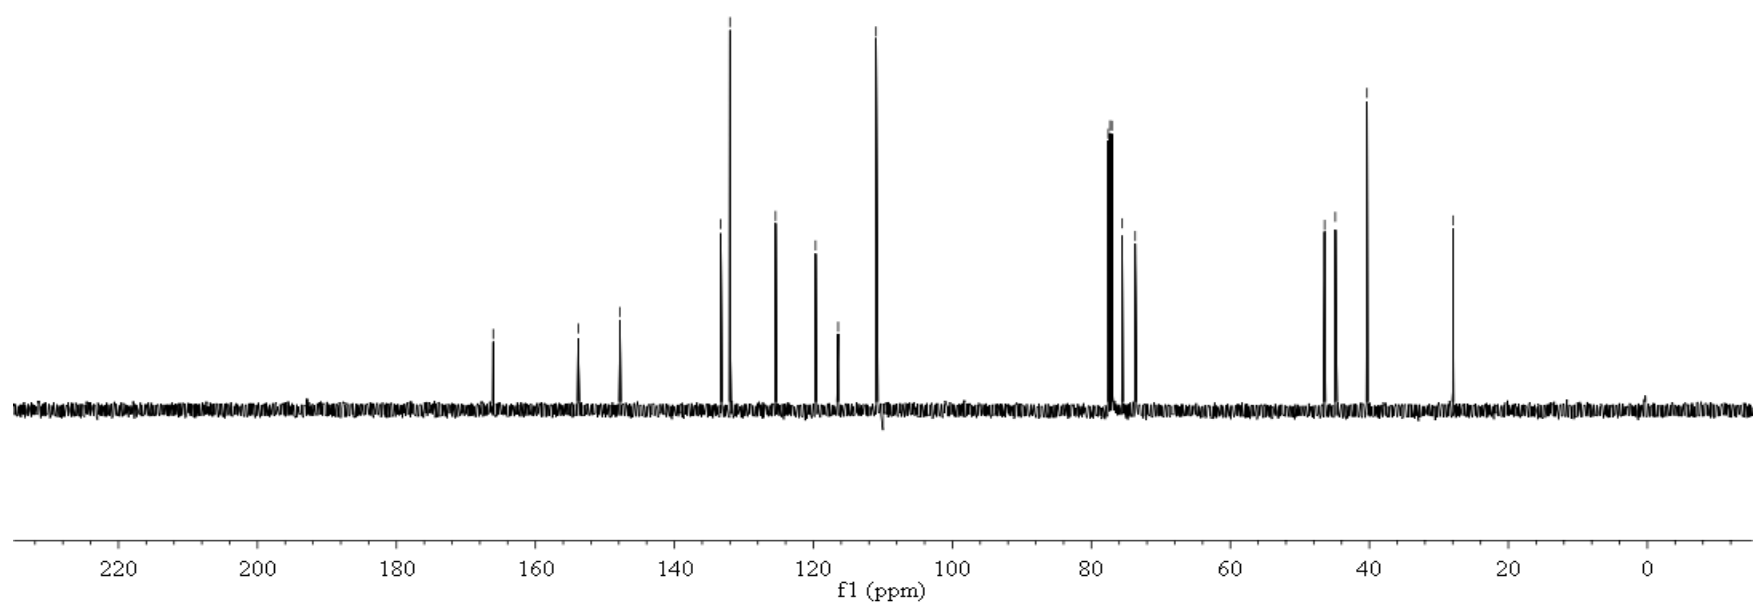

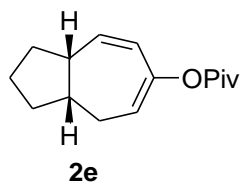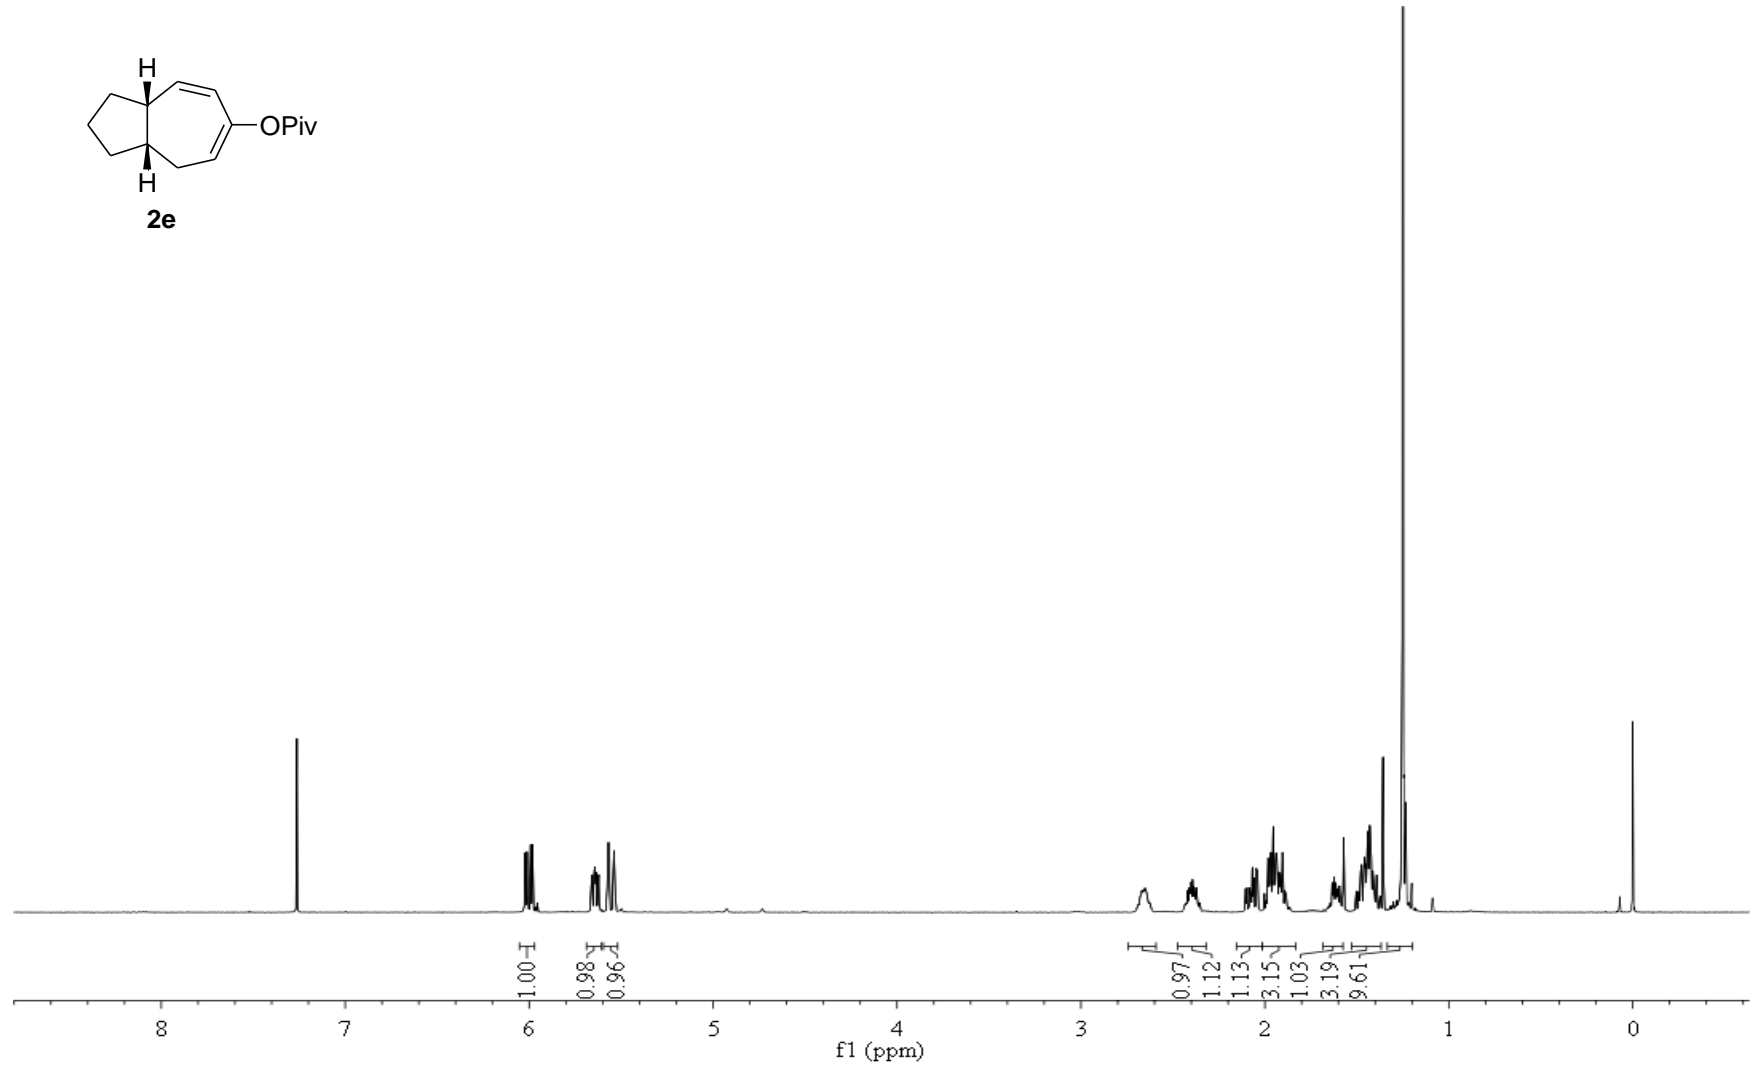

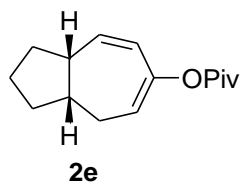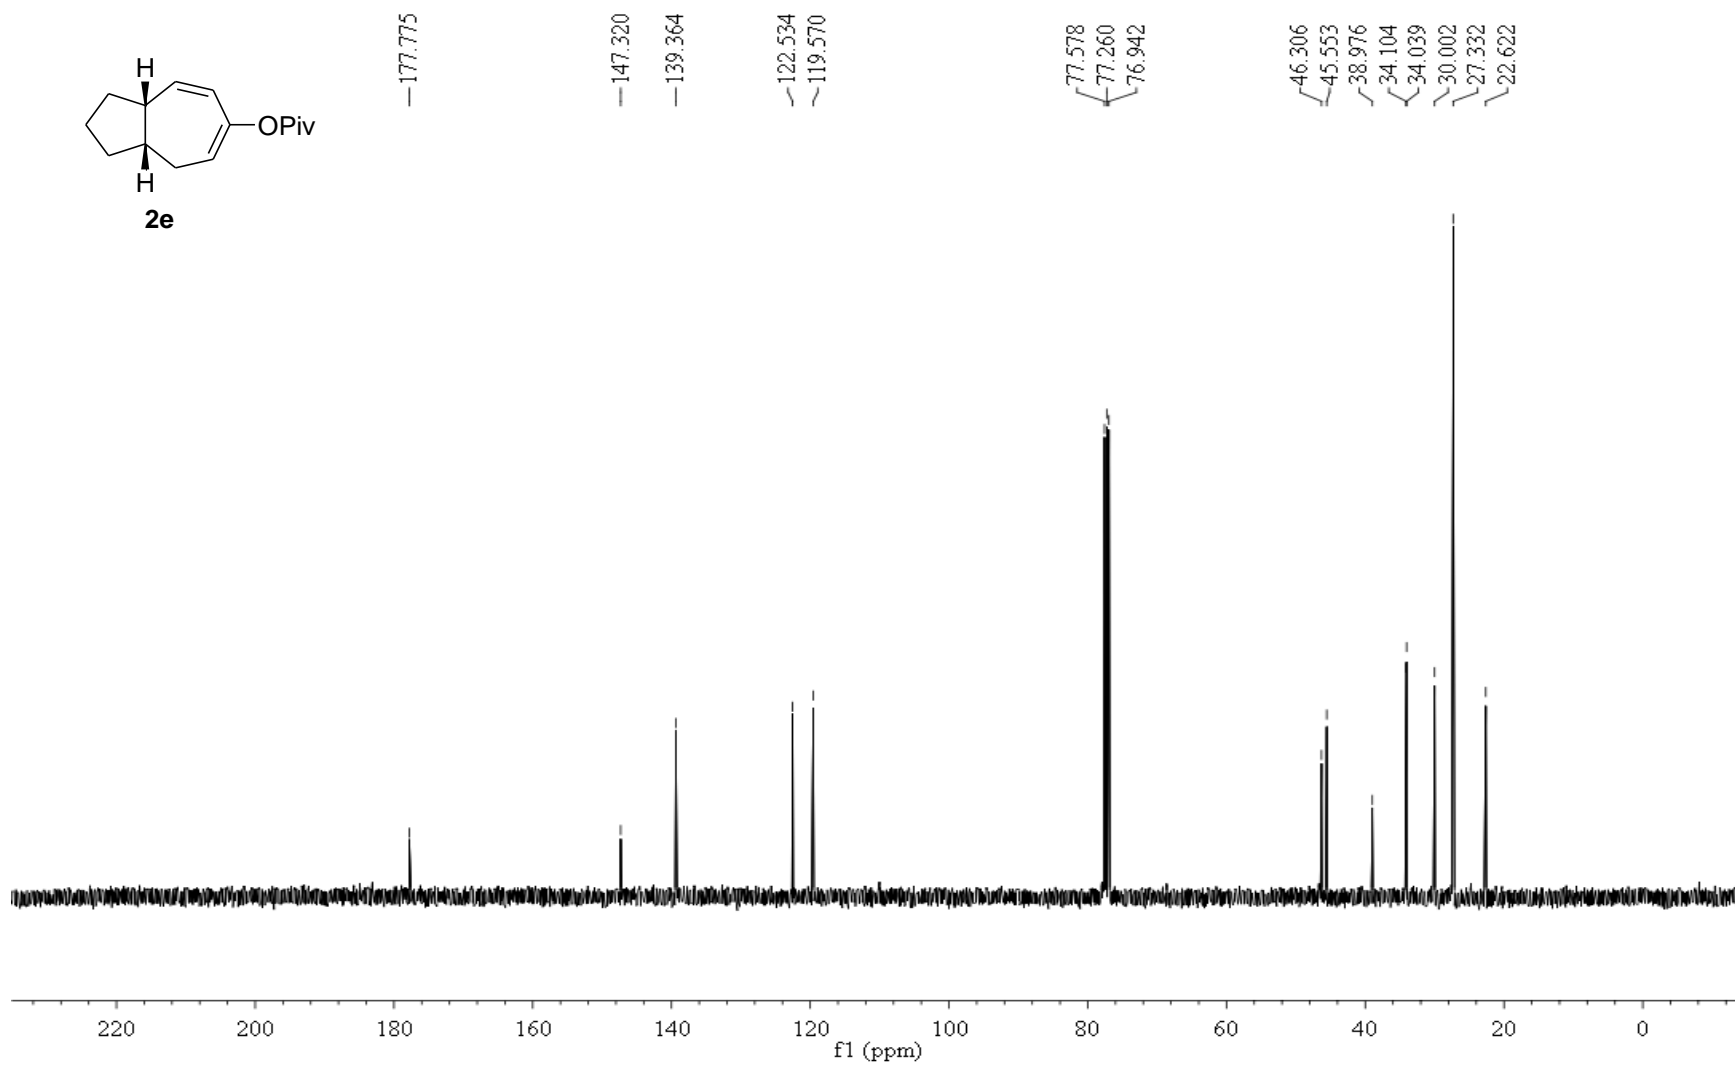

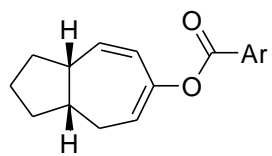

**2f** (Ar = *p*-Me<sub>2</sub>N)

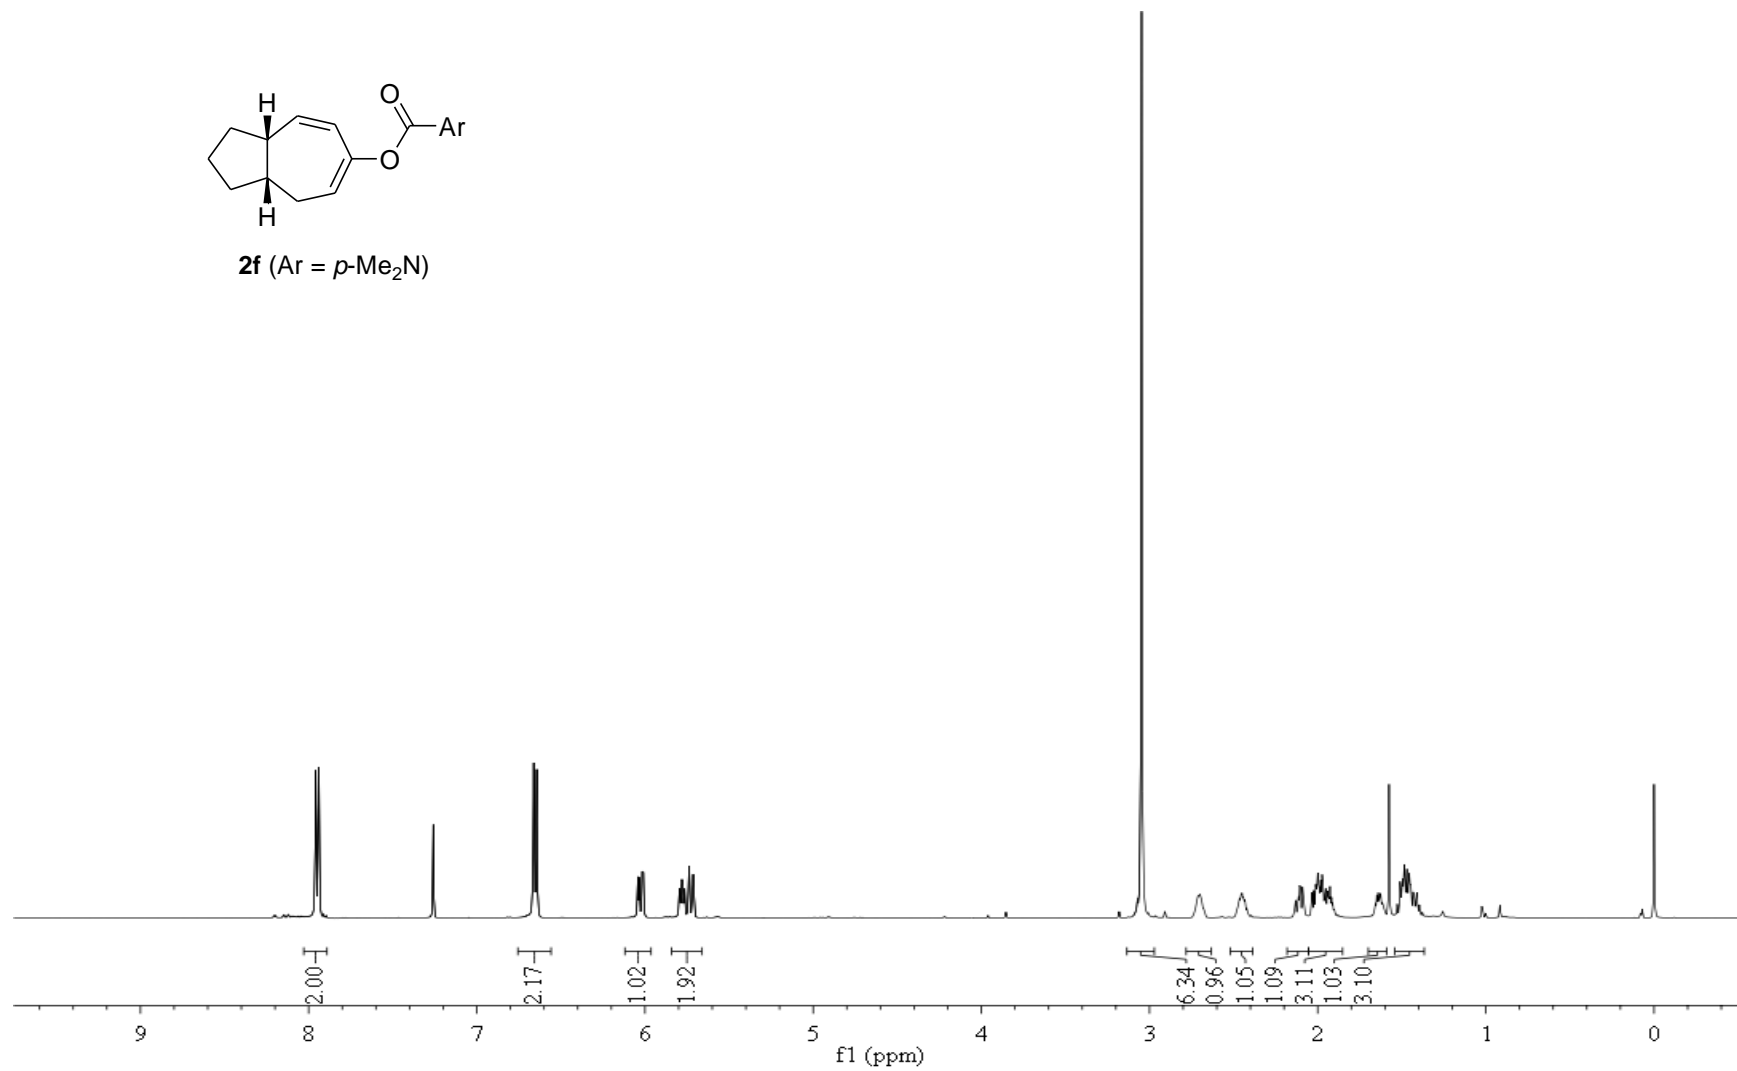

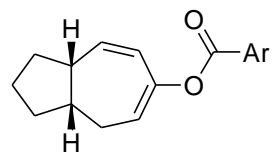

**2f** (Ar = *p*-Me<sub>2</sub>N)

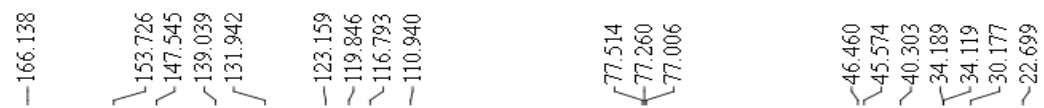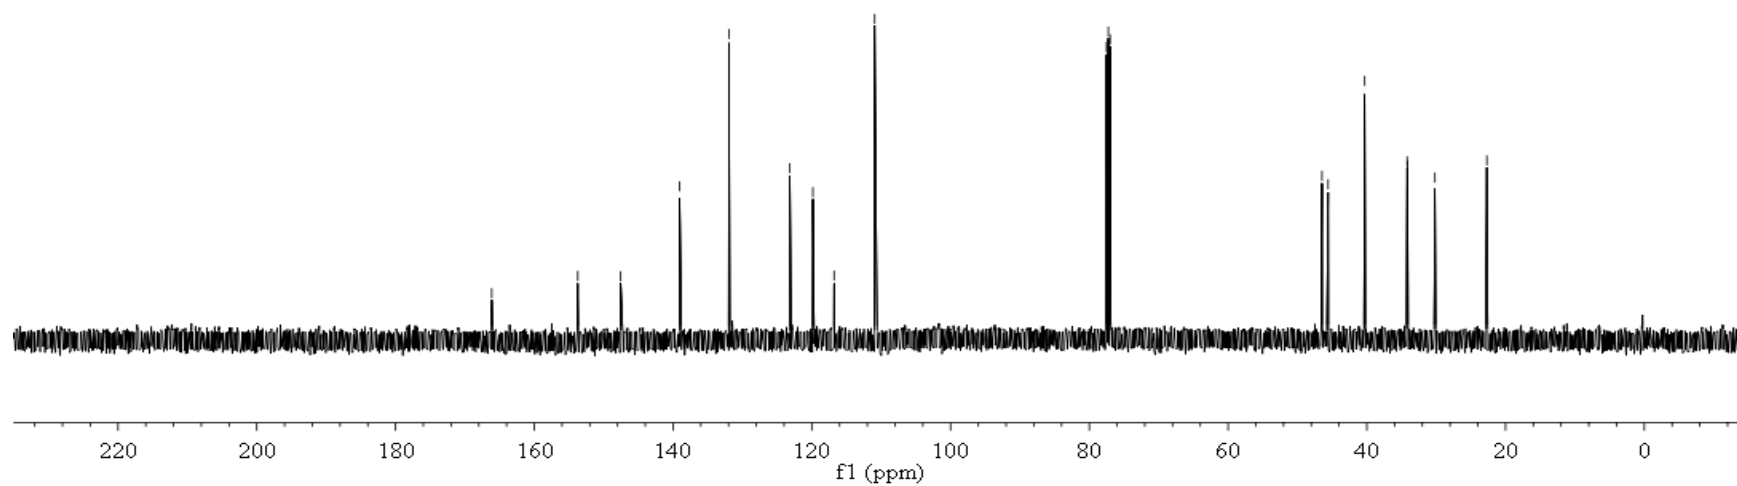

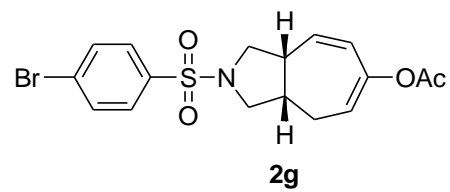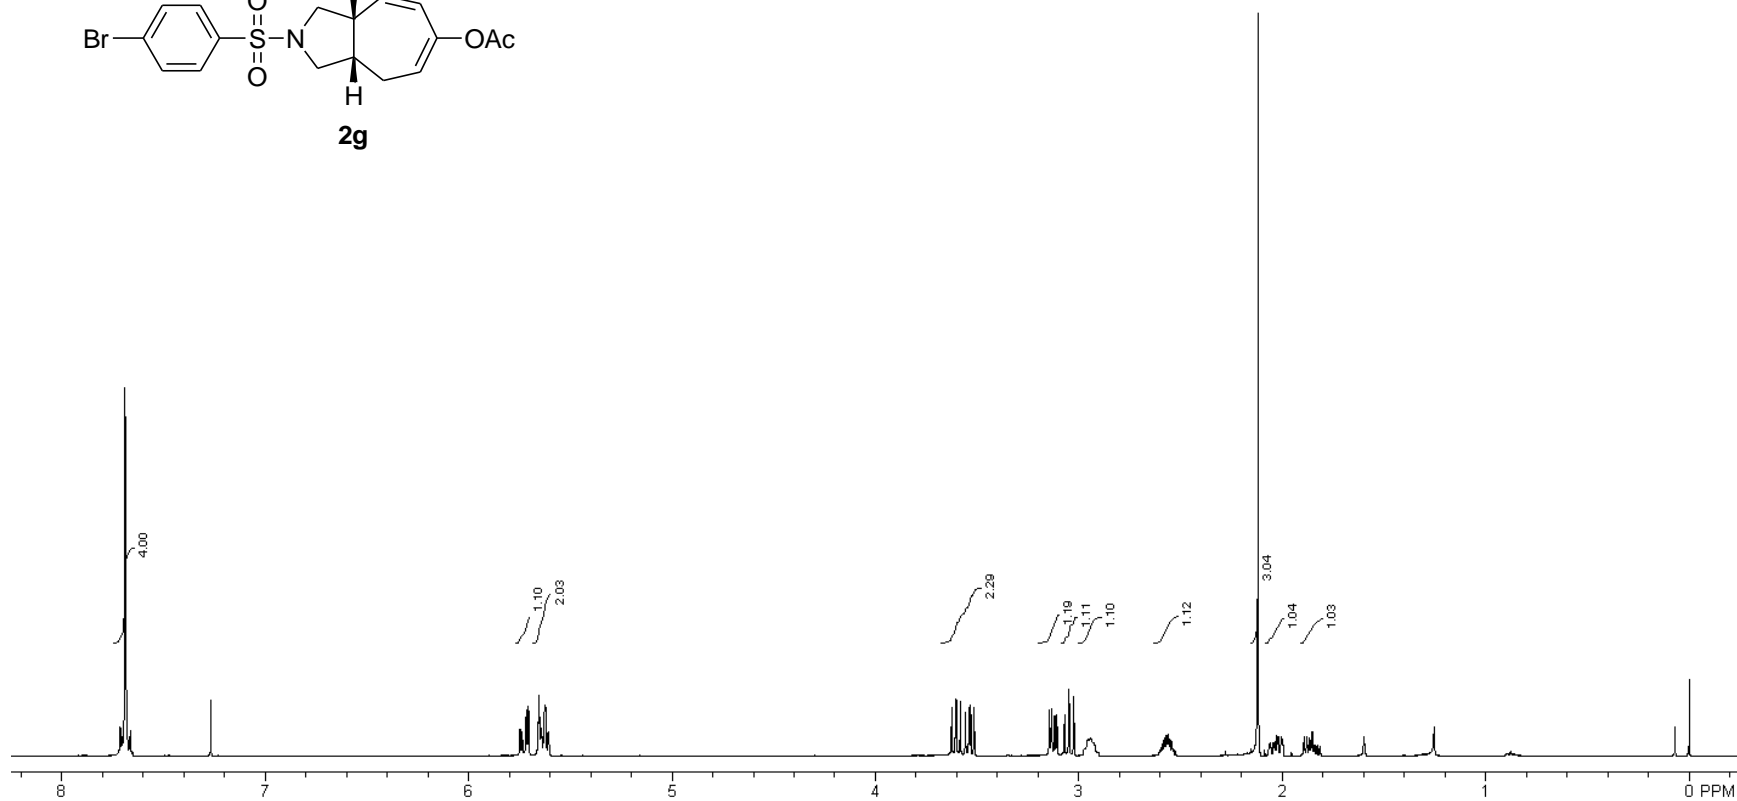

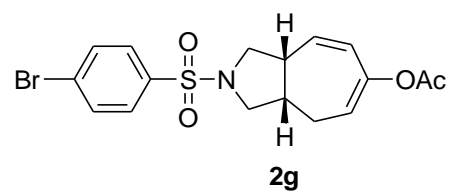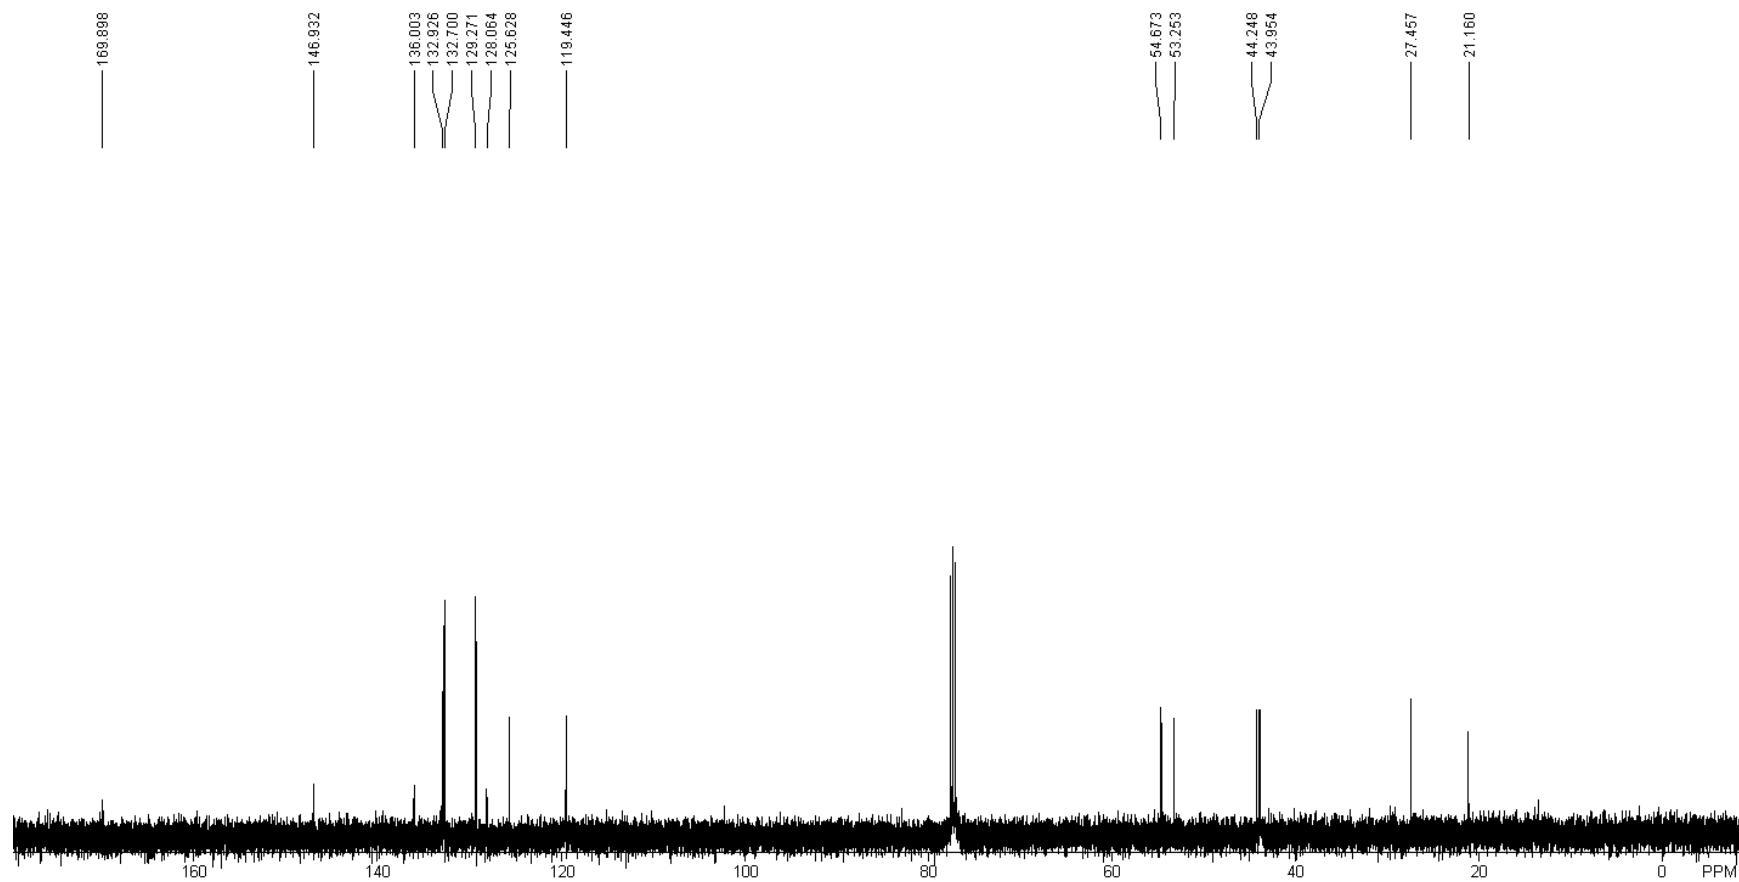

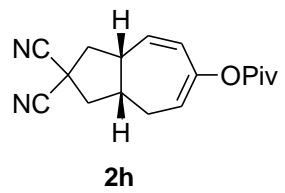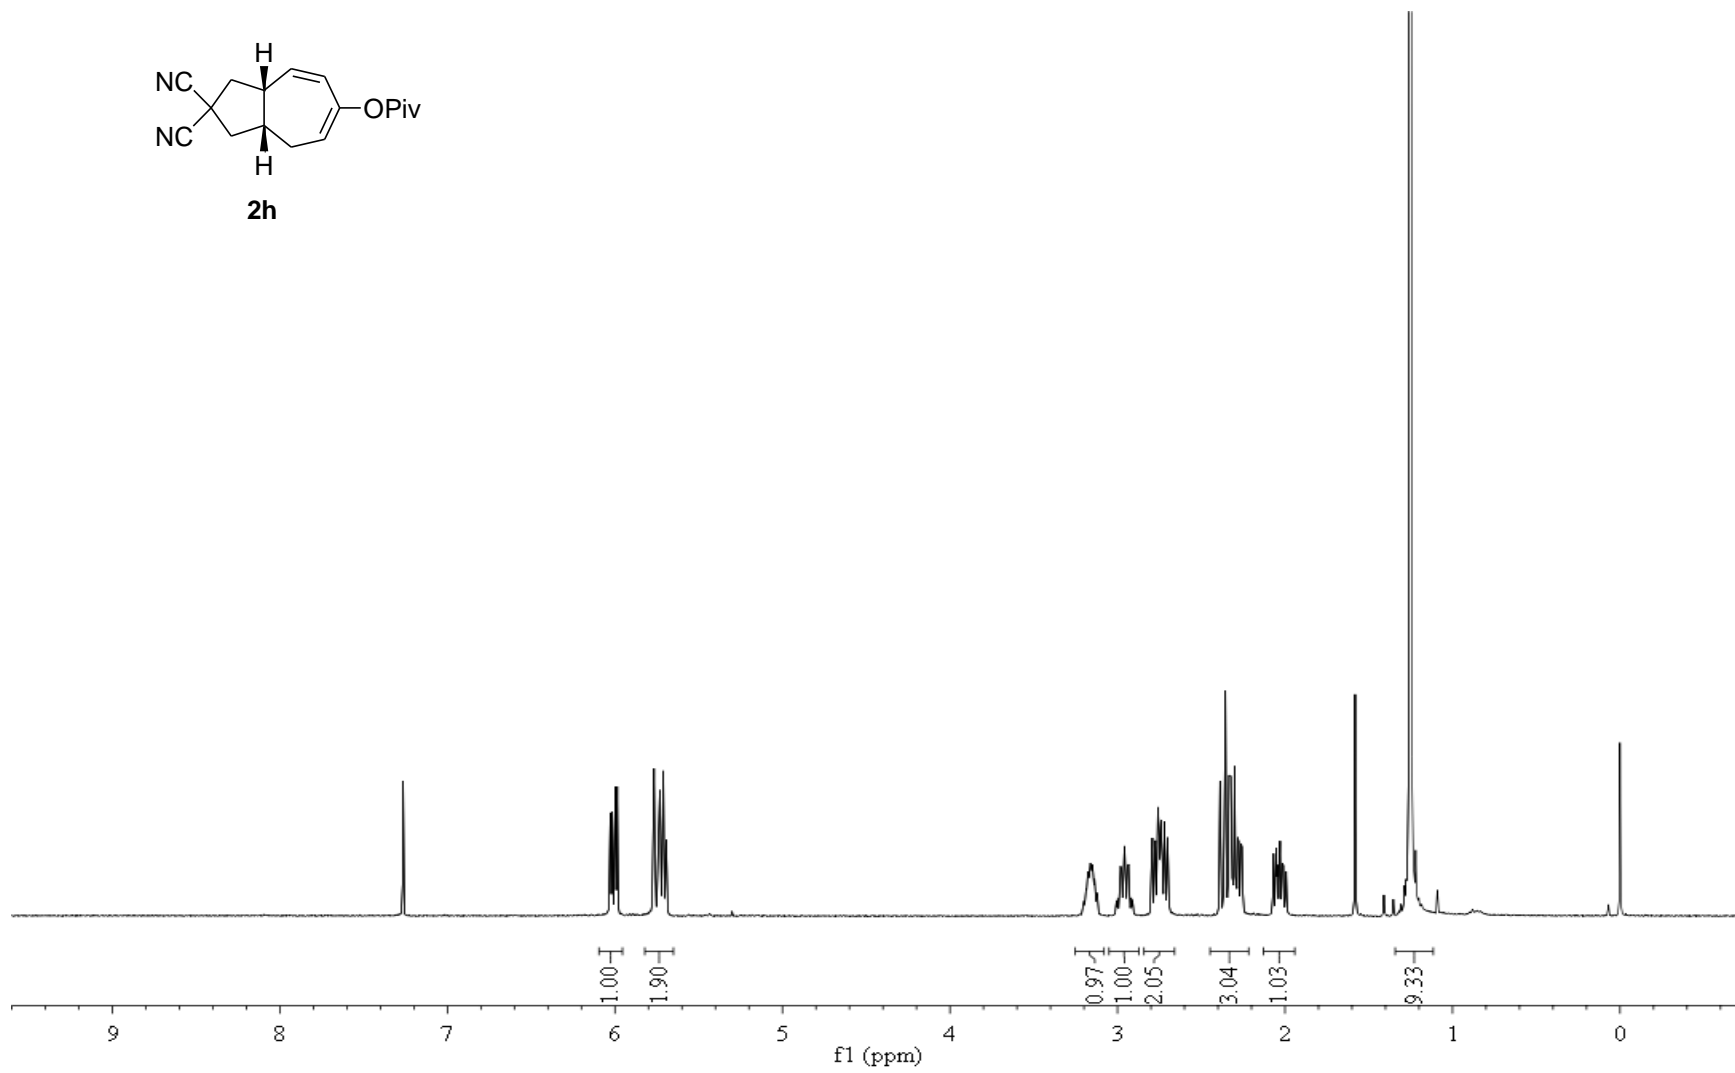



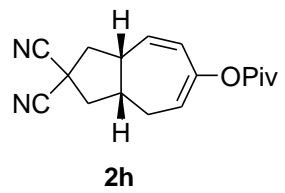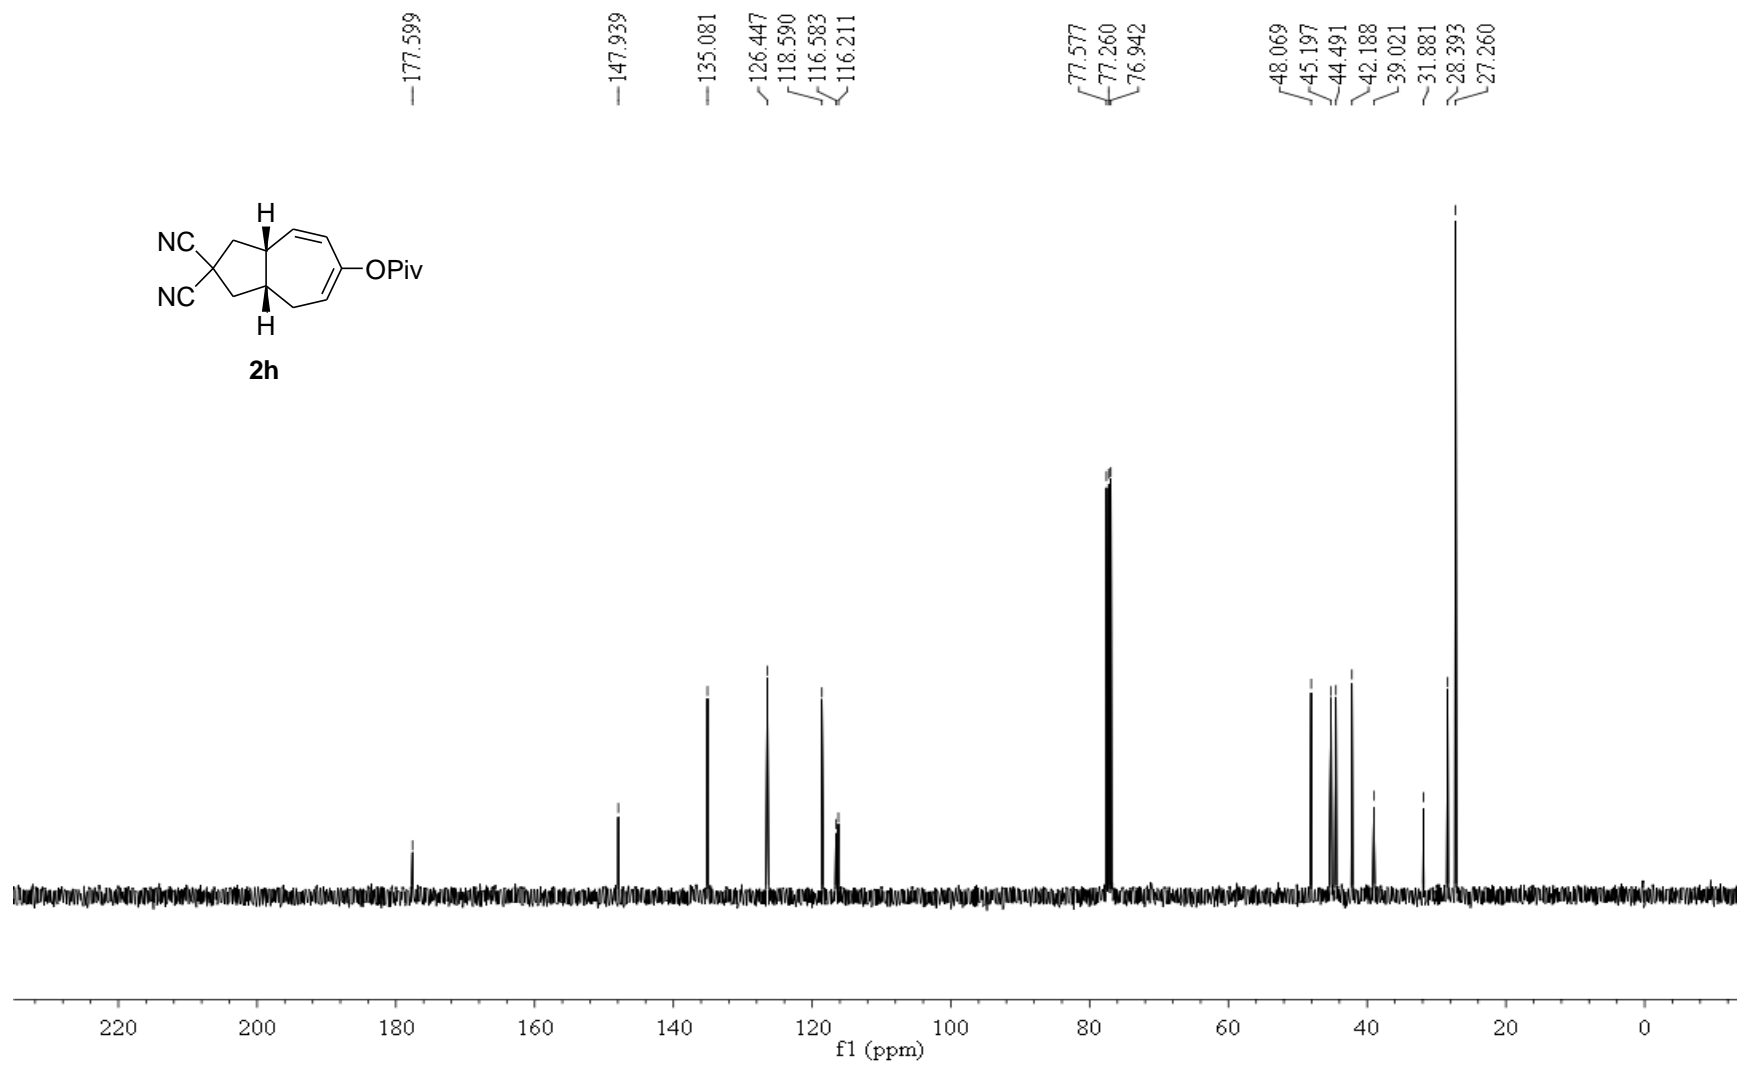

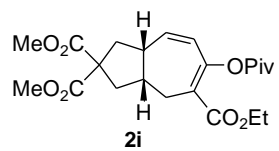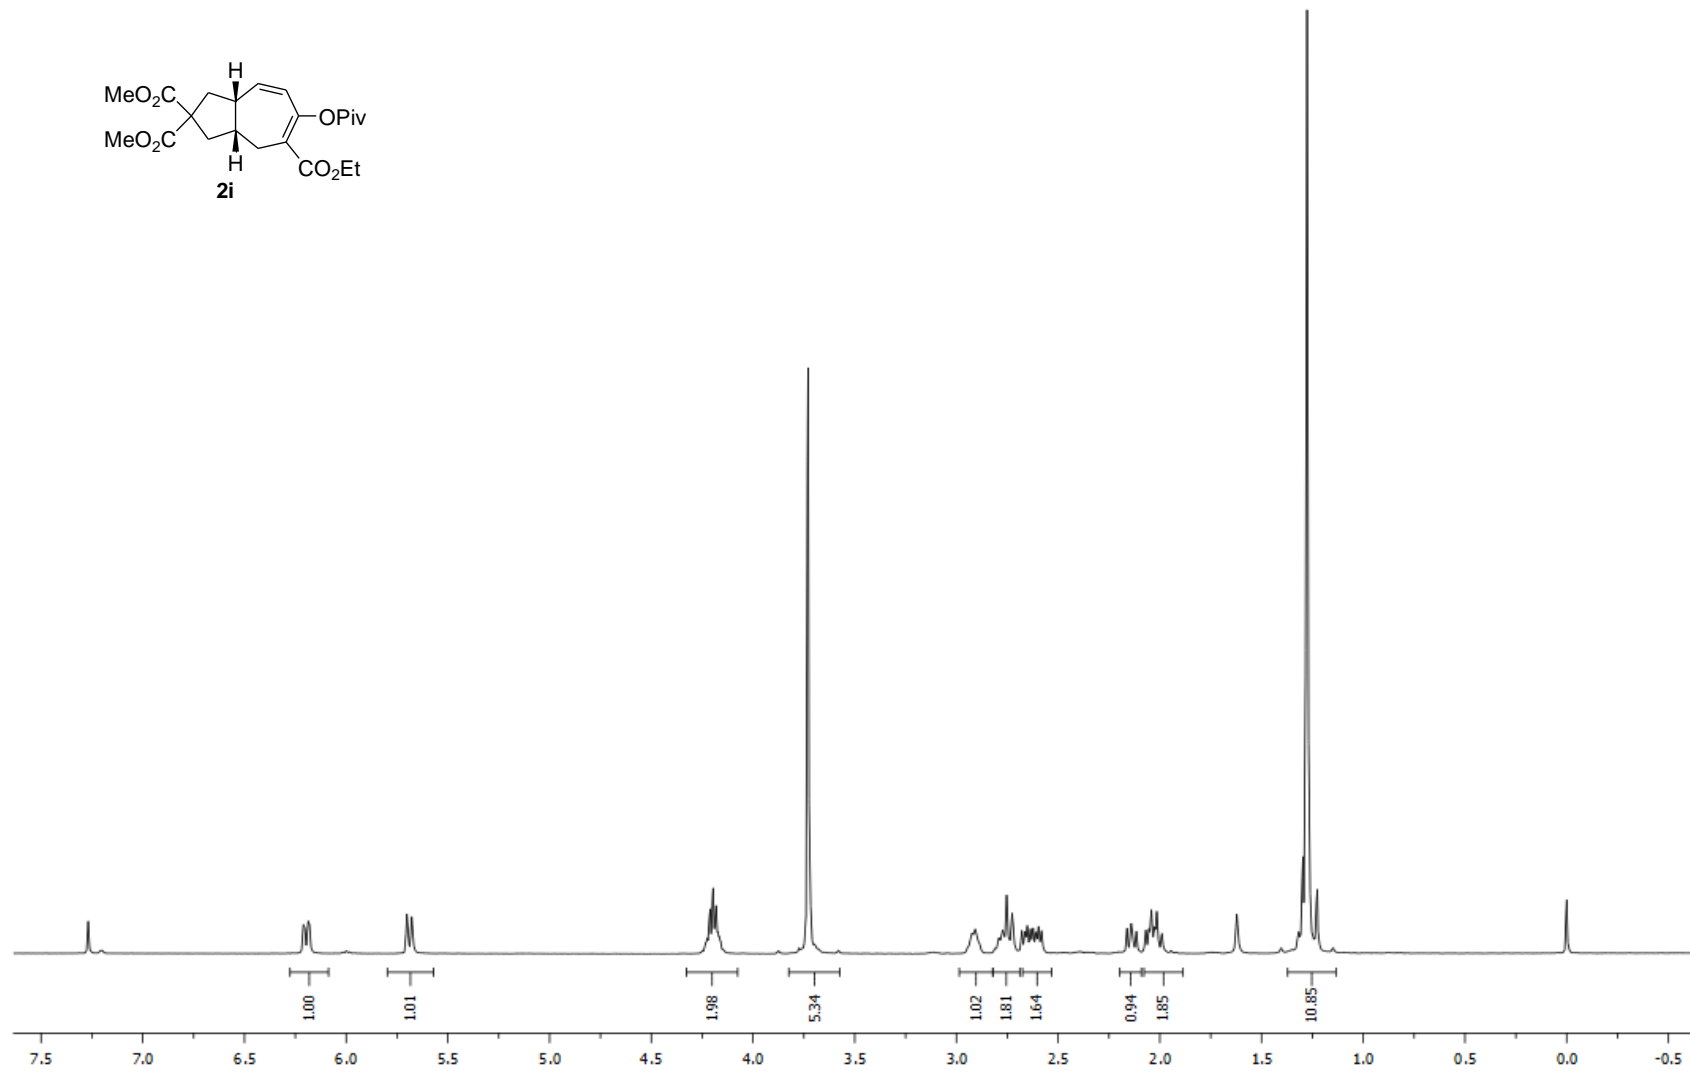

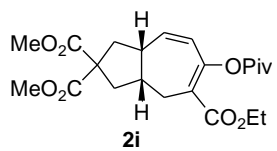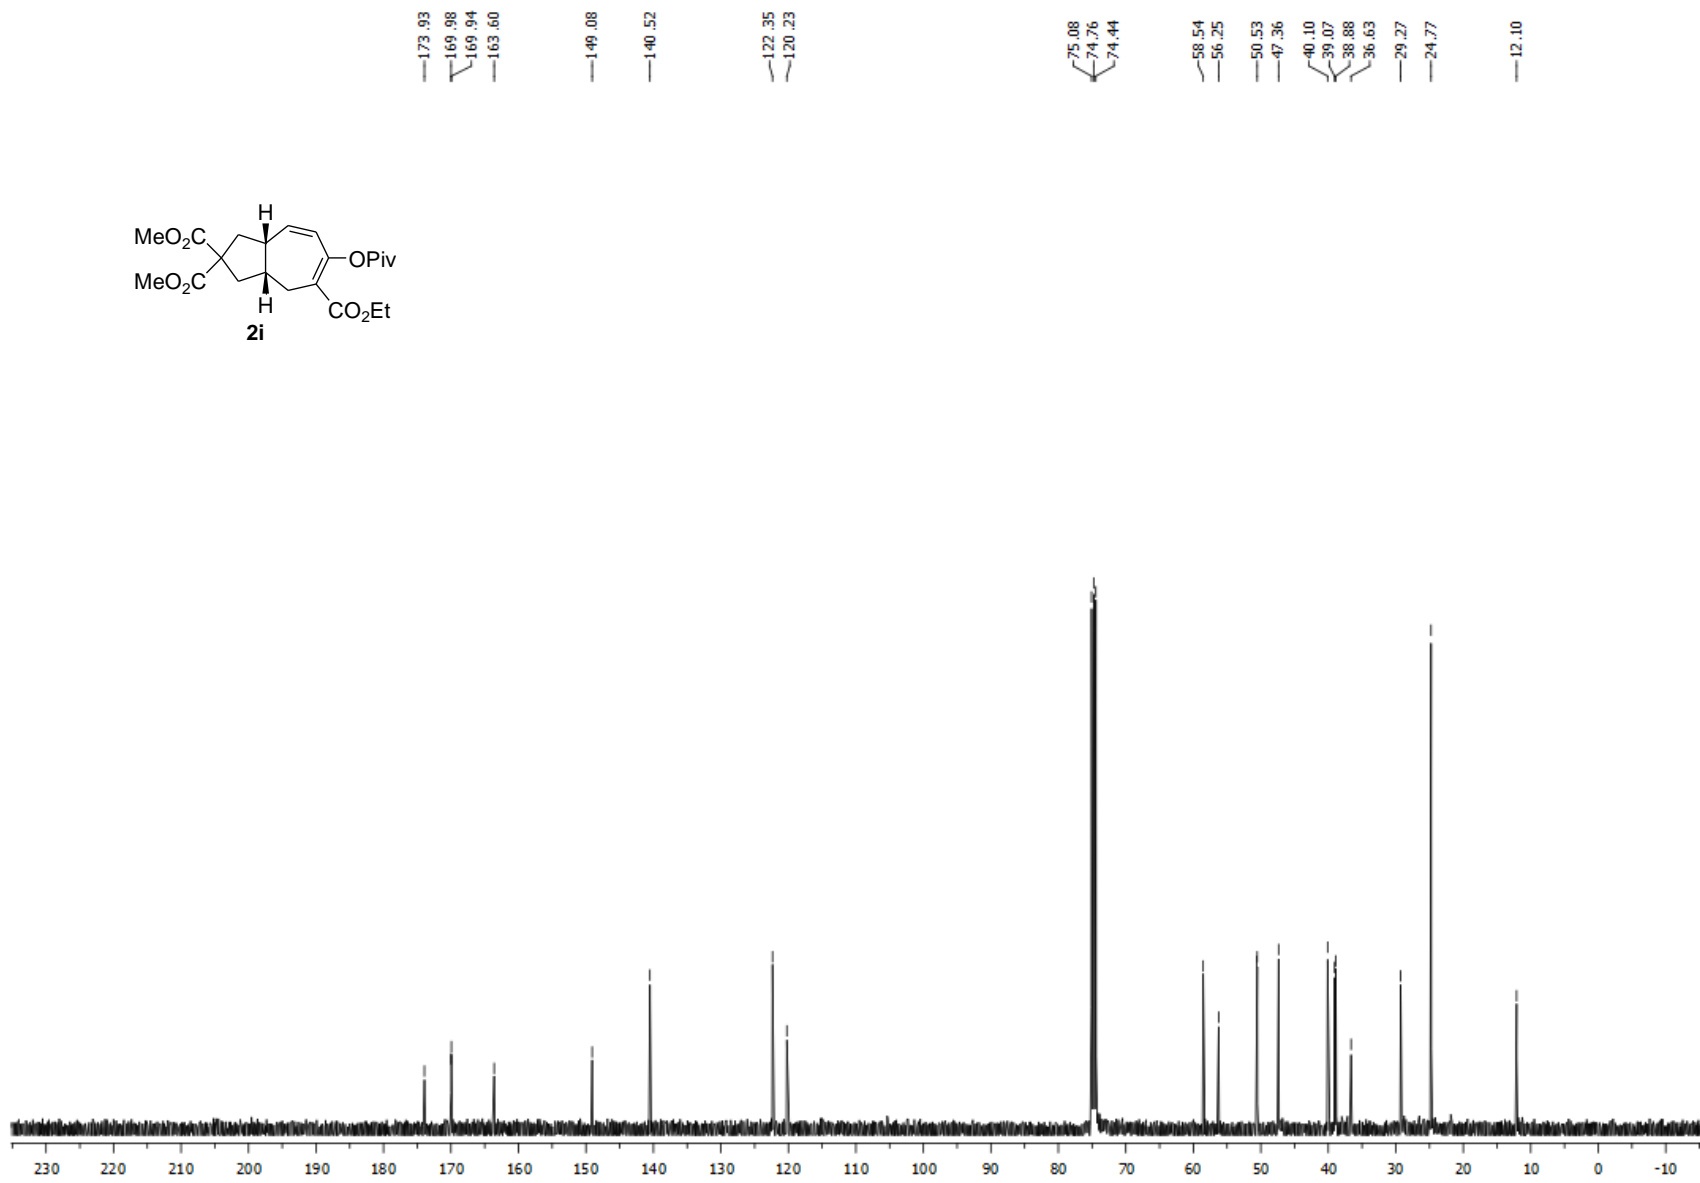

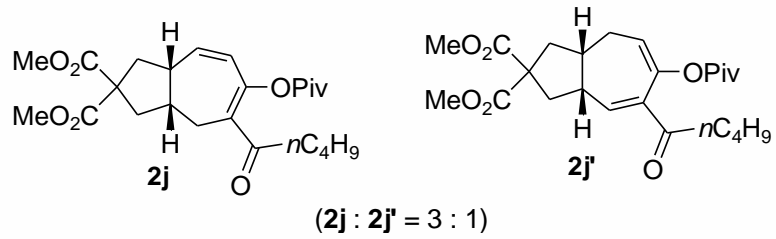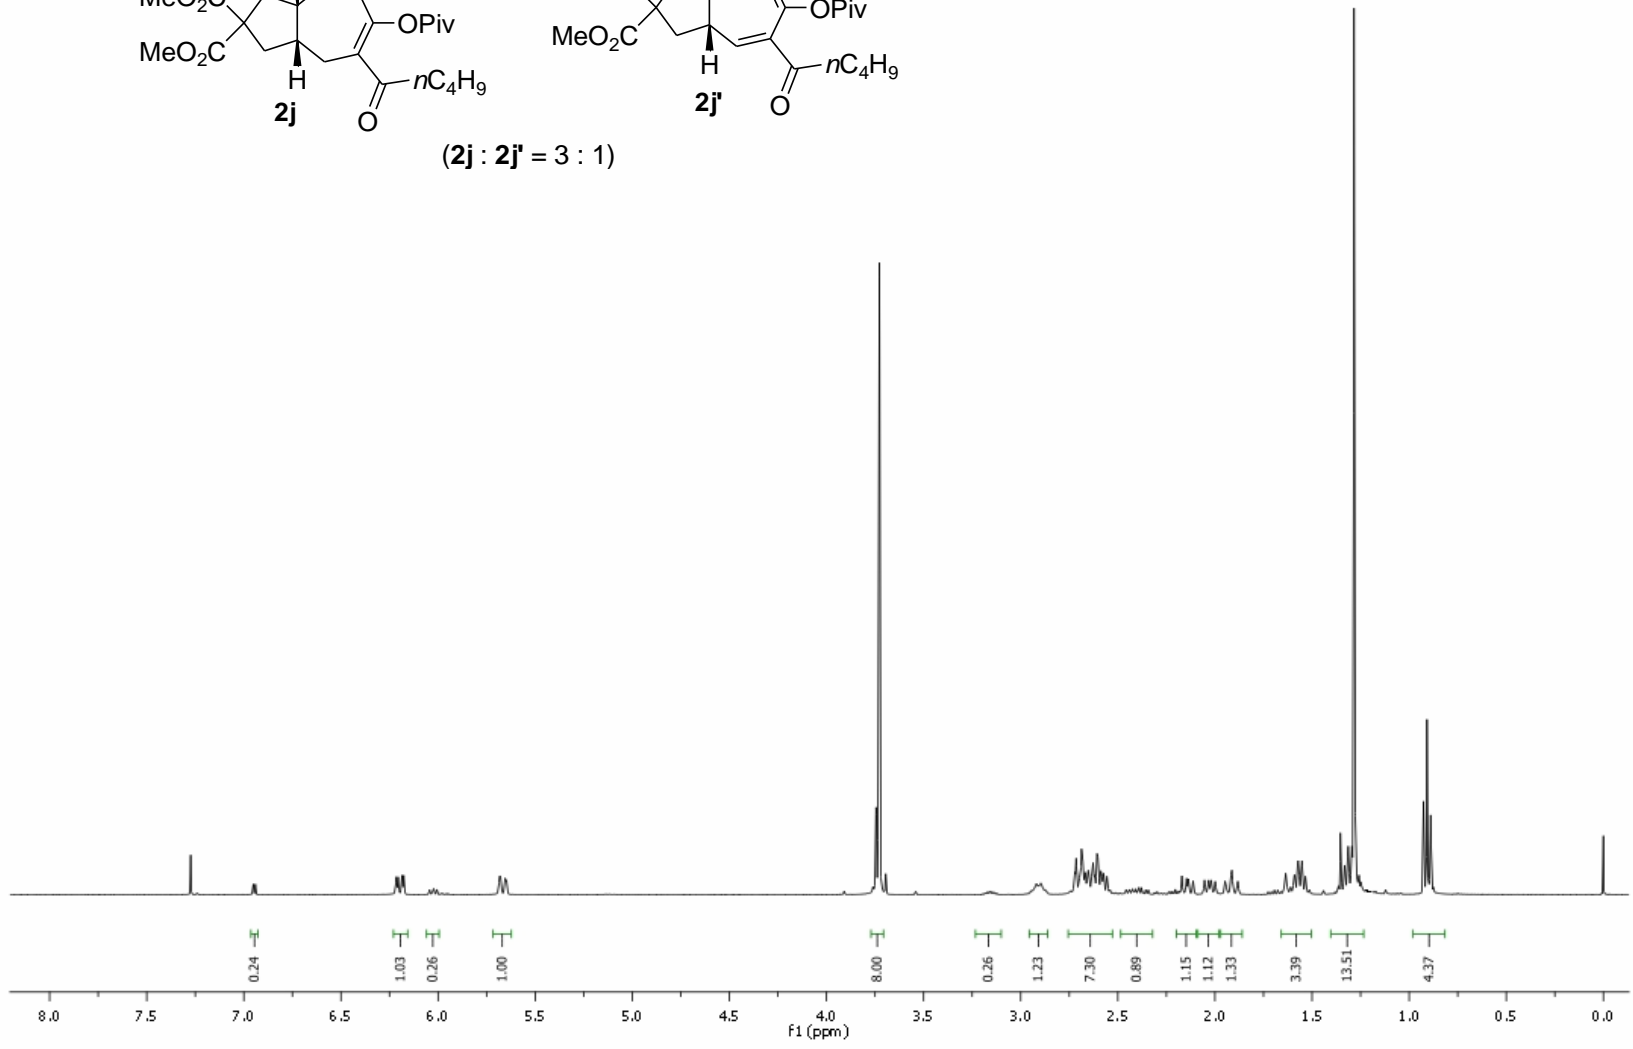

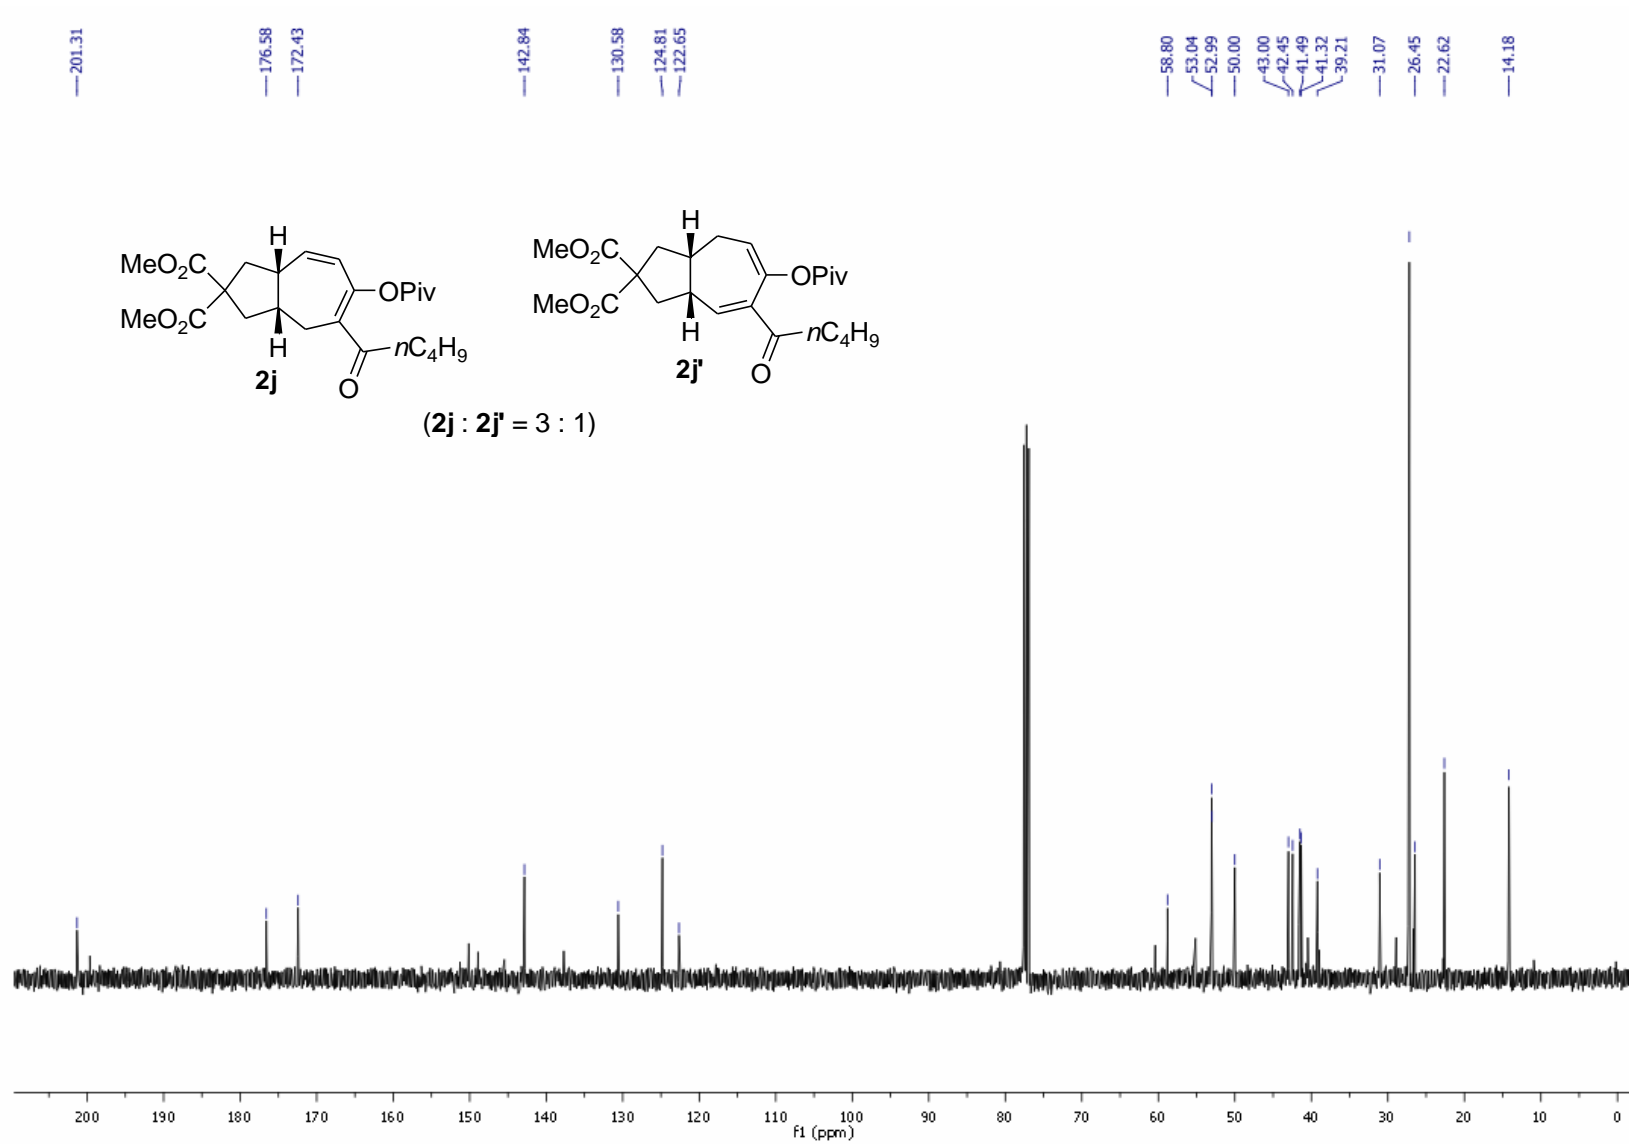

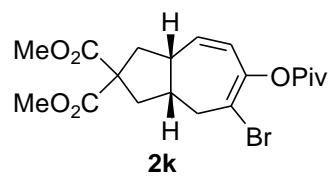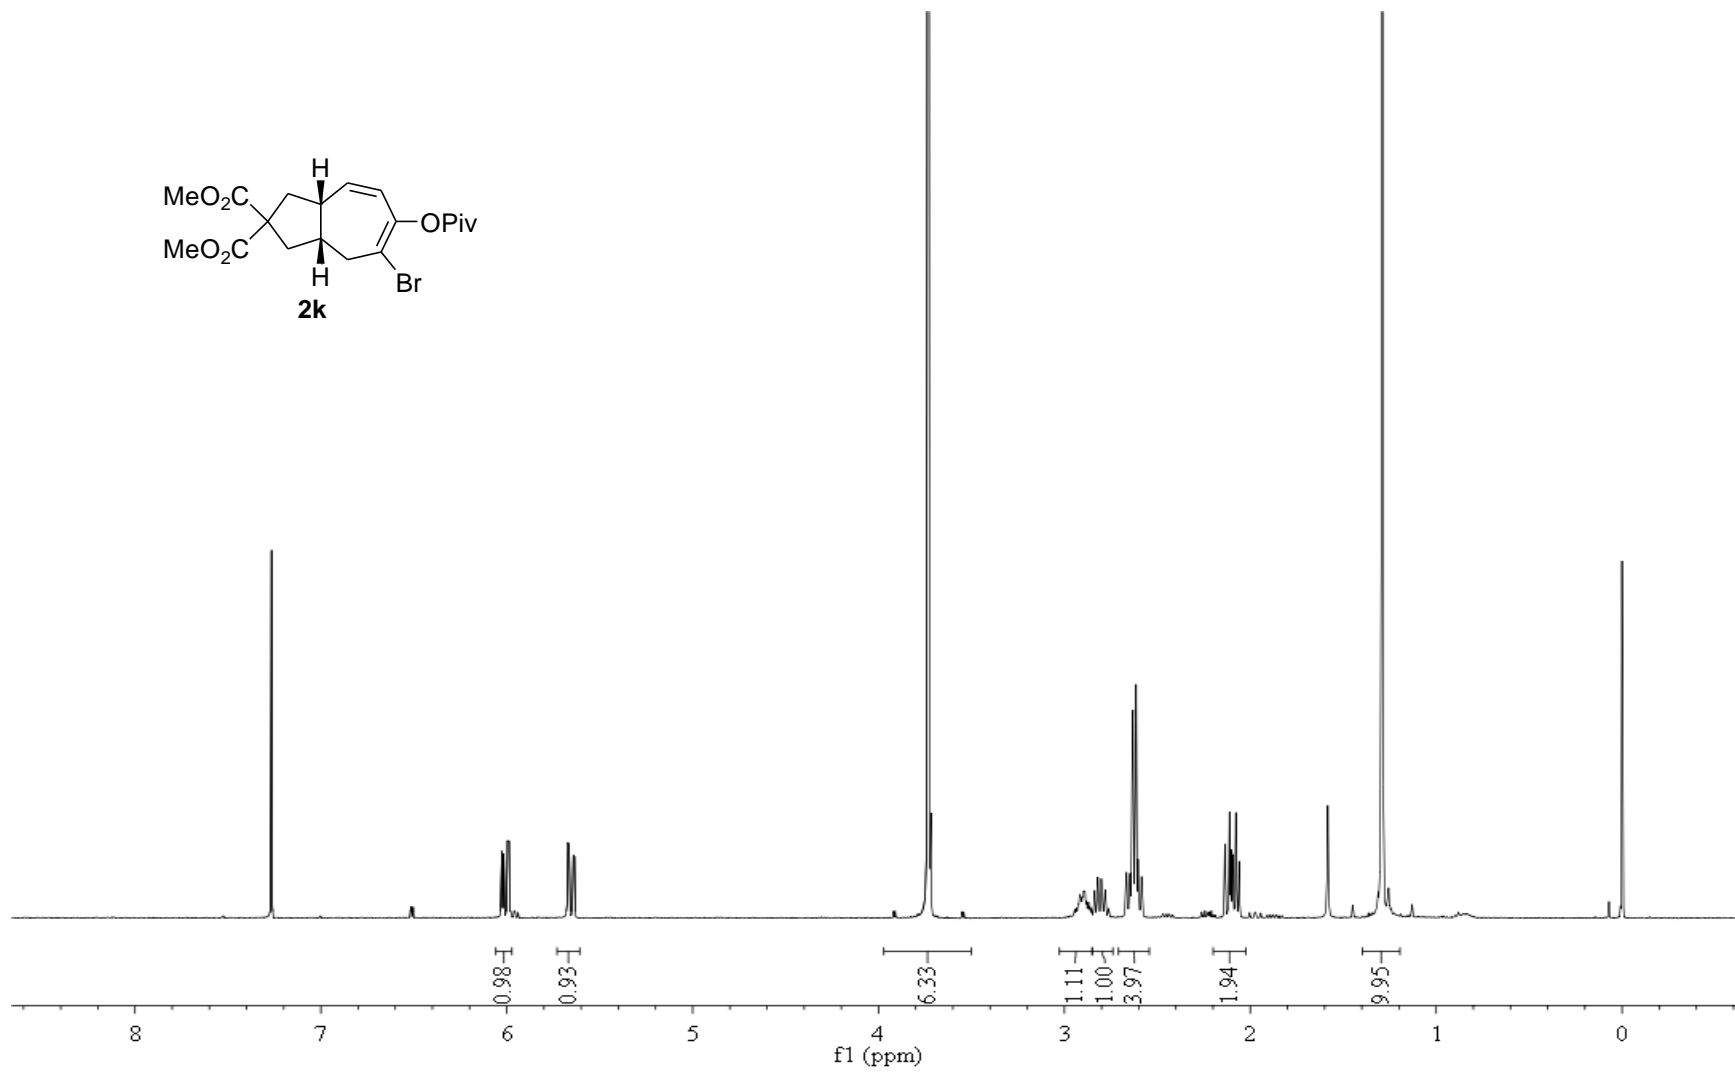

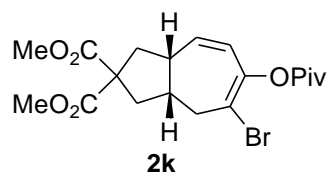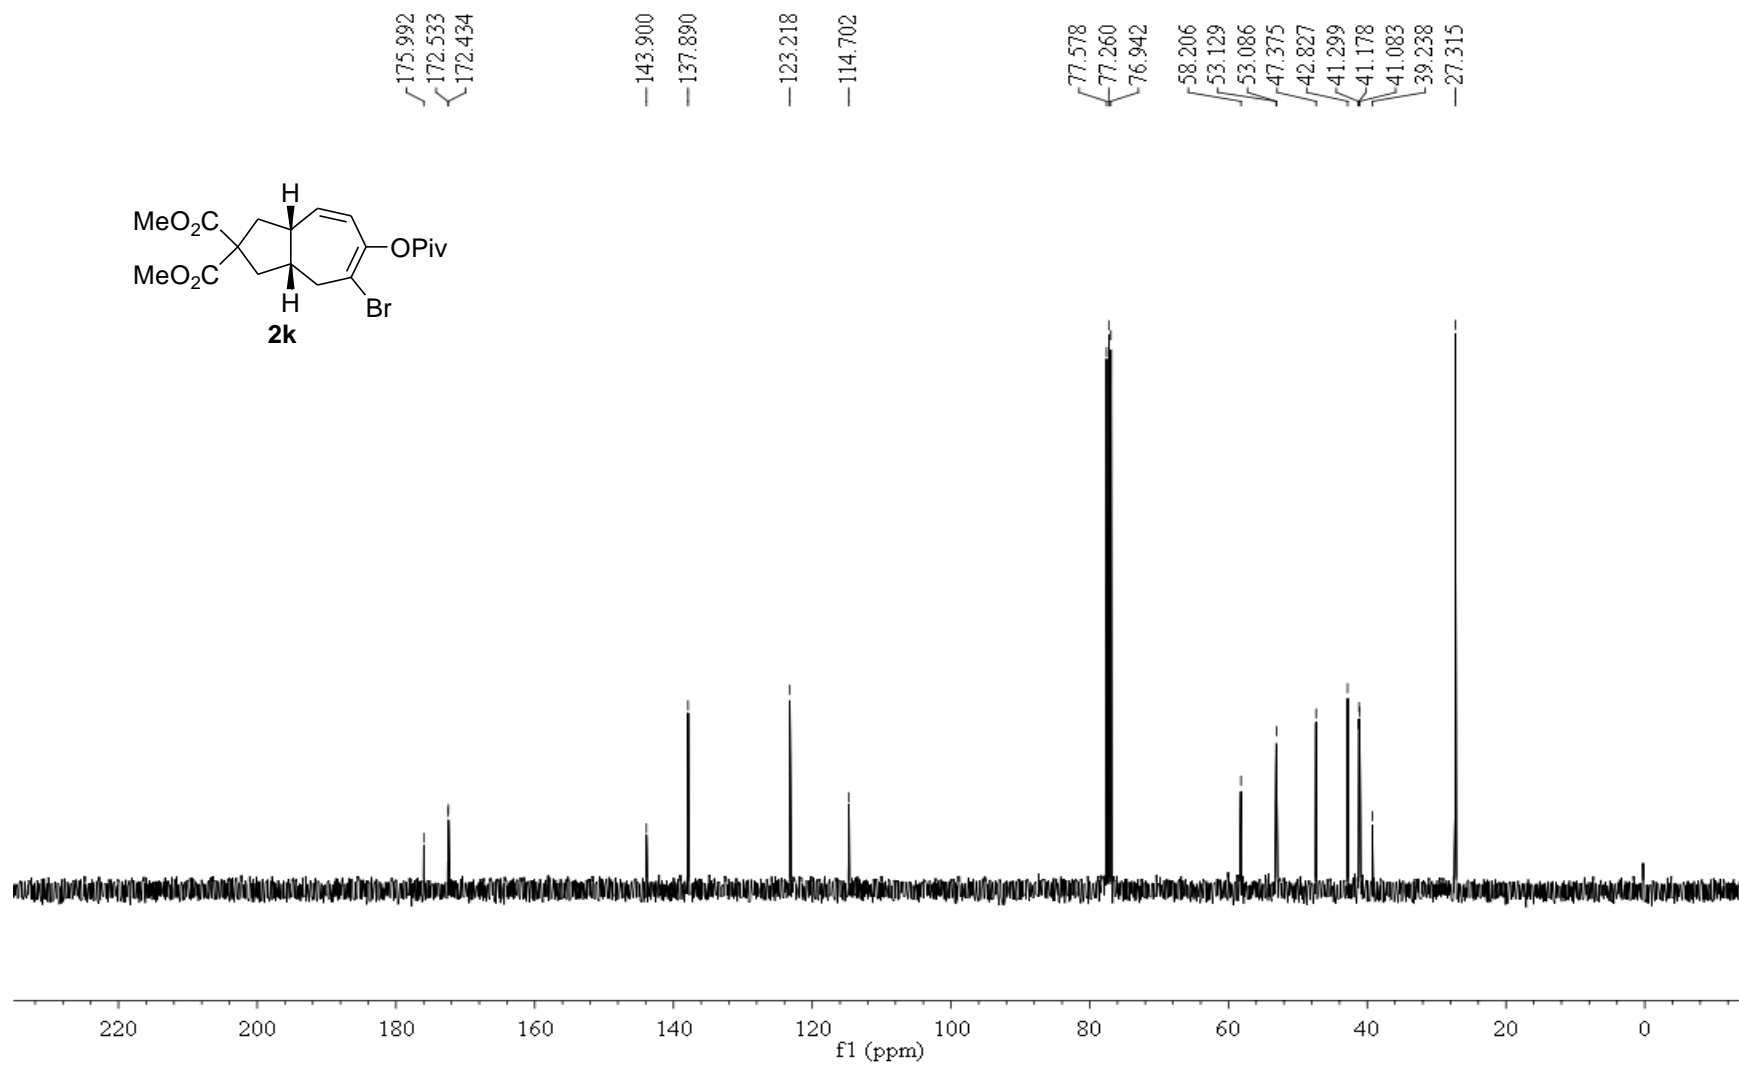

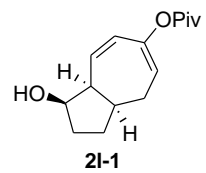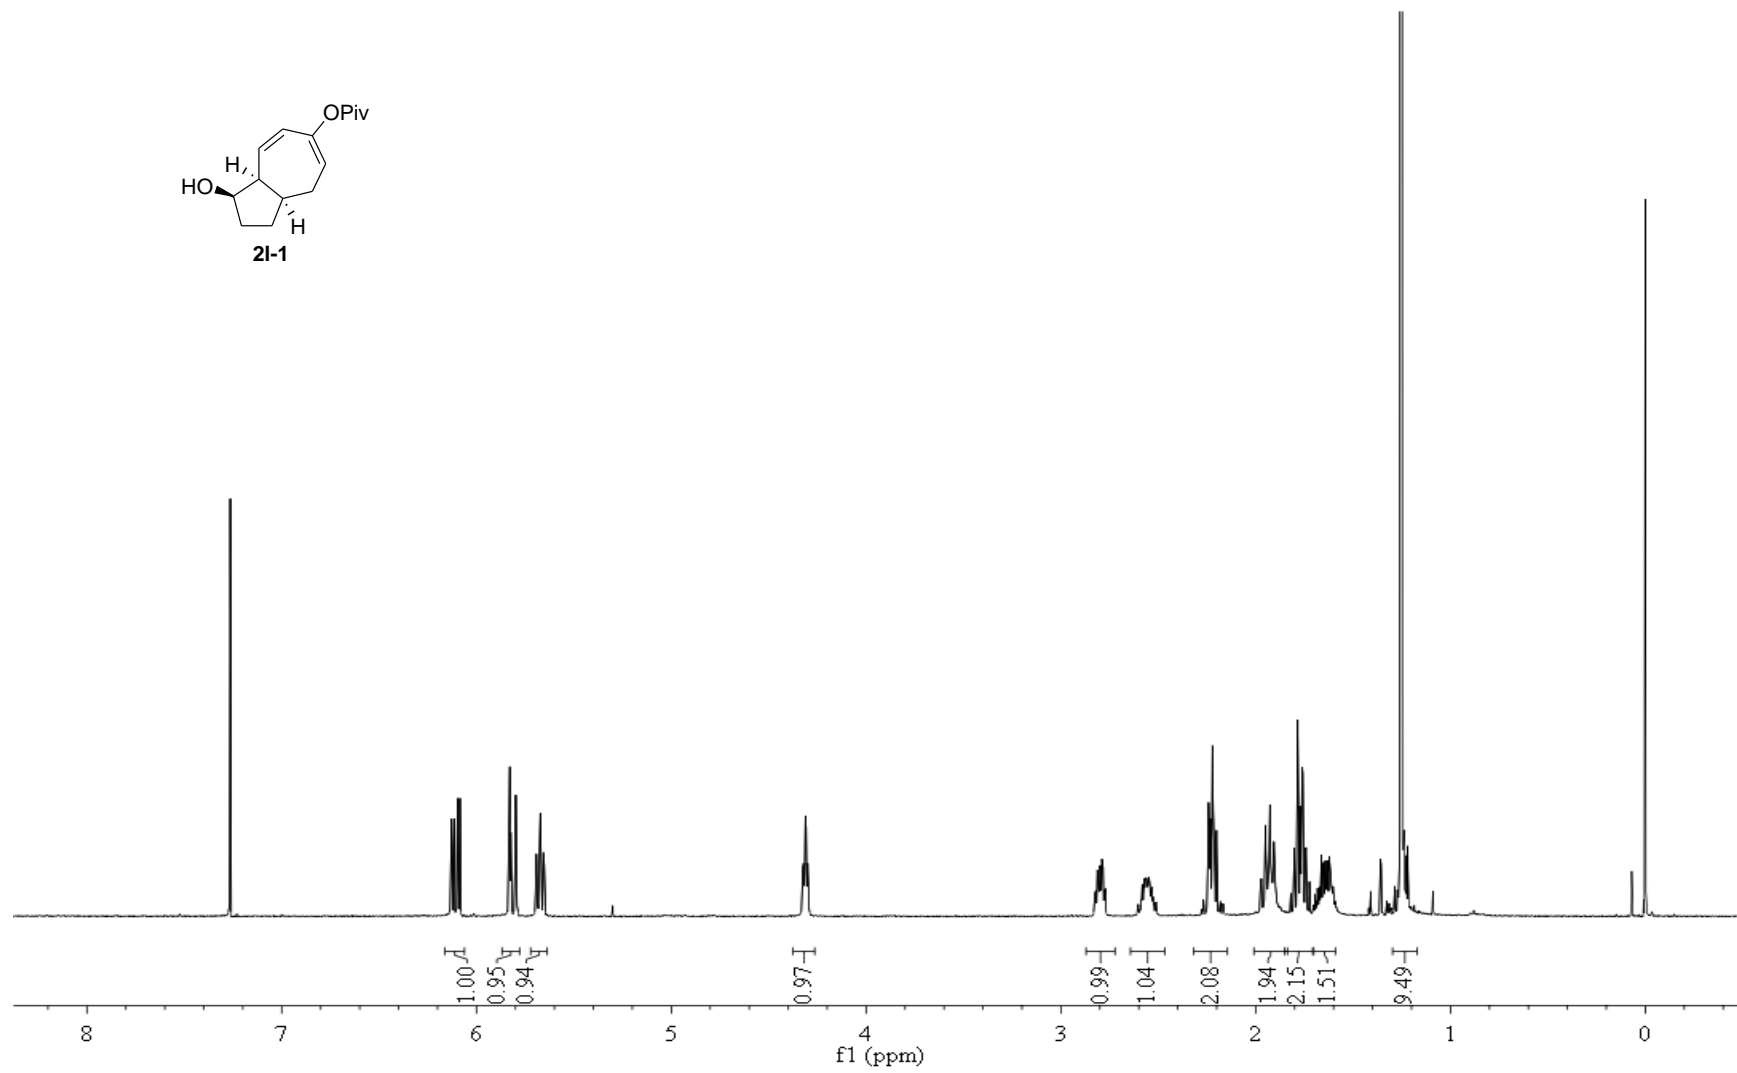



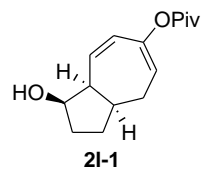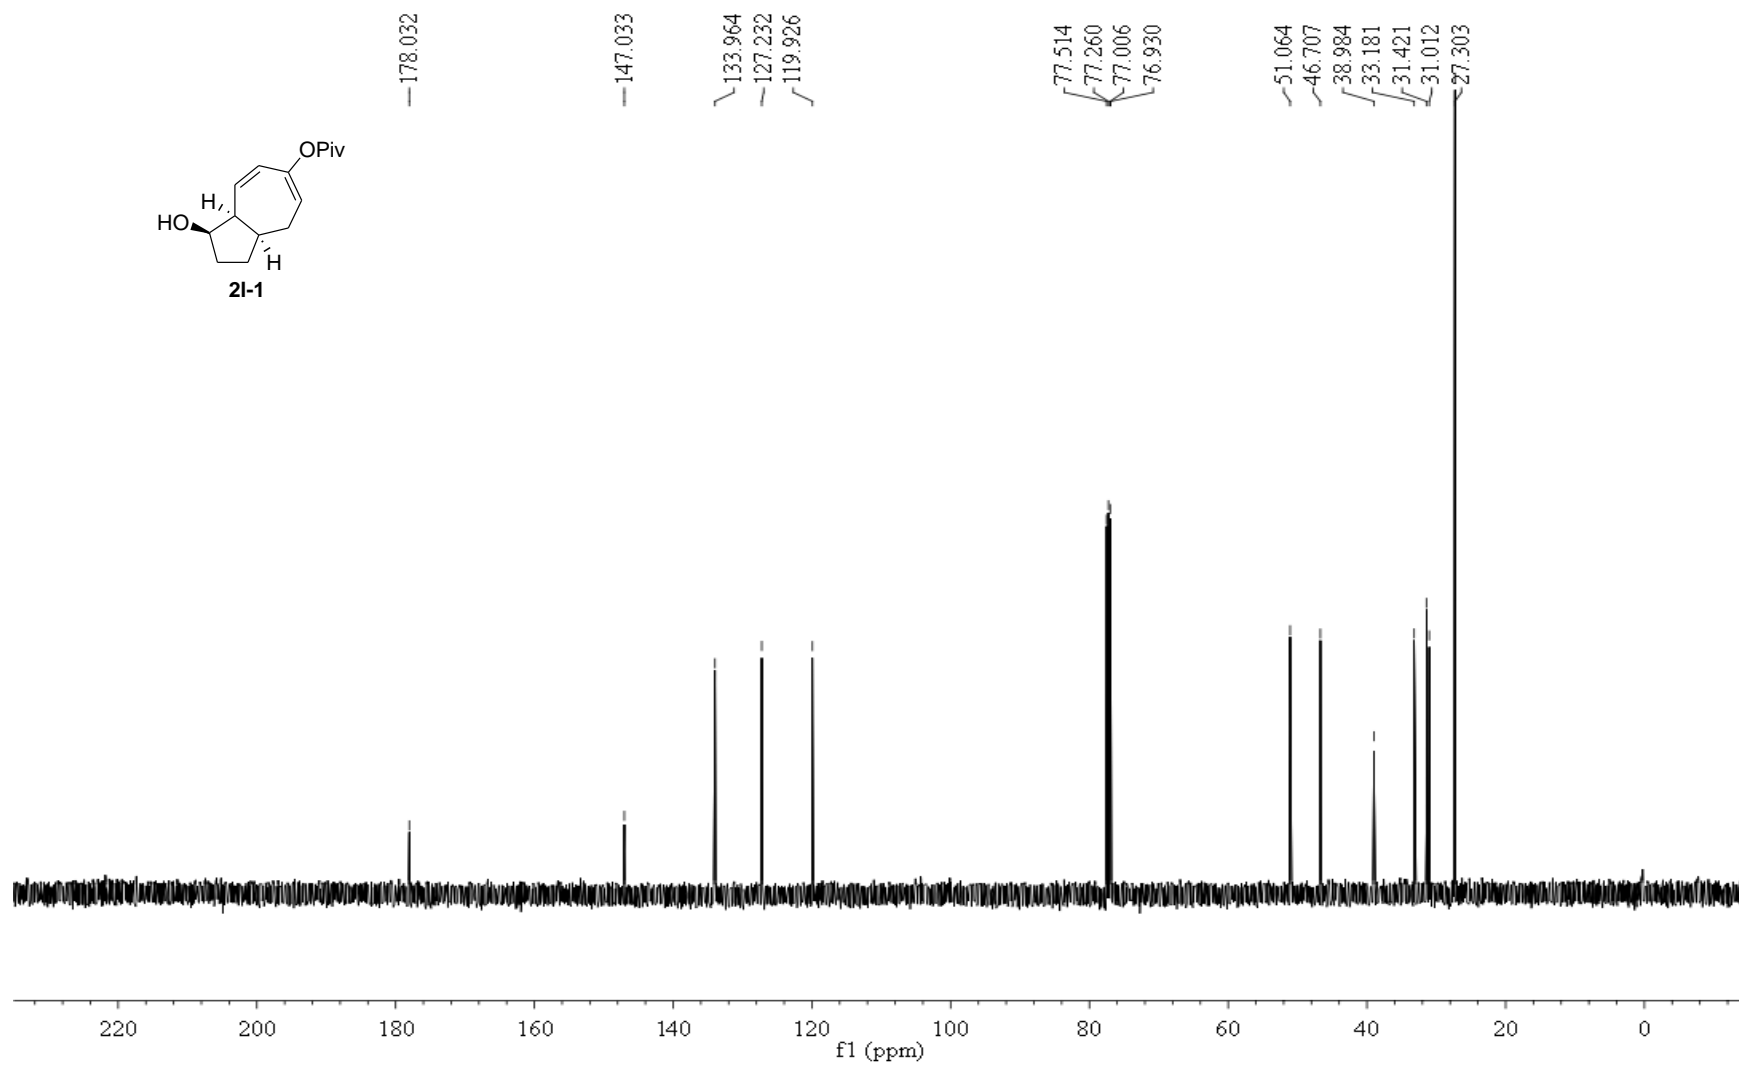

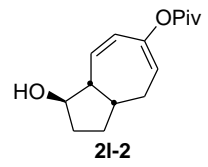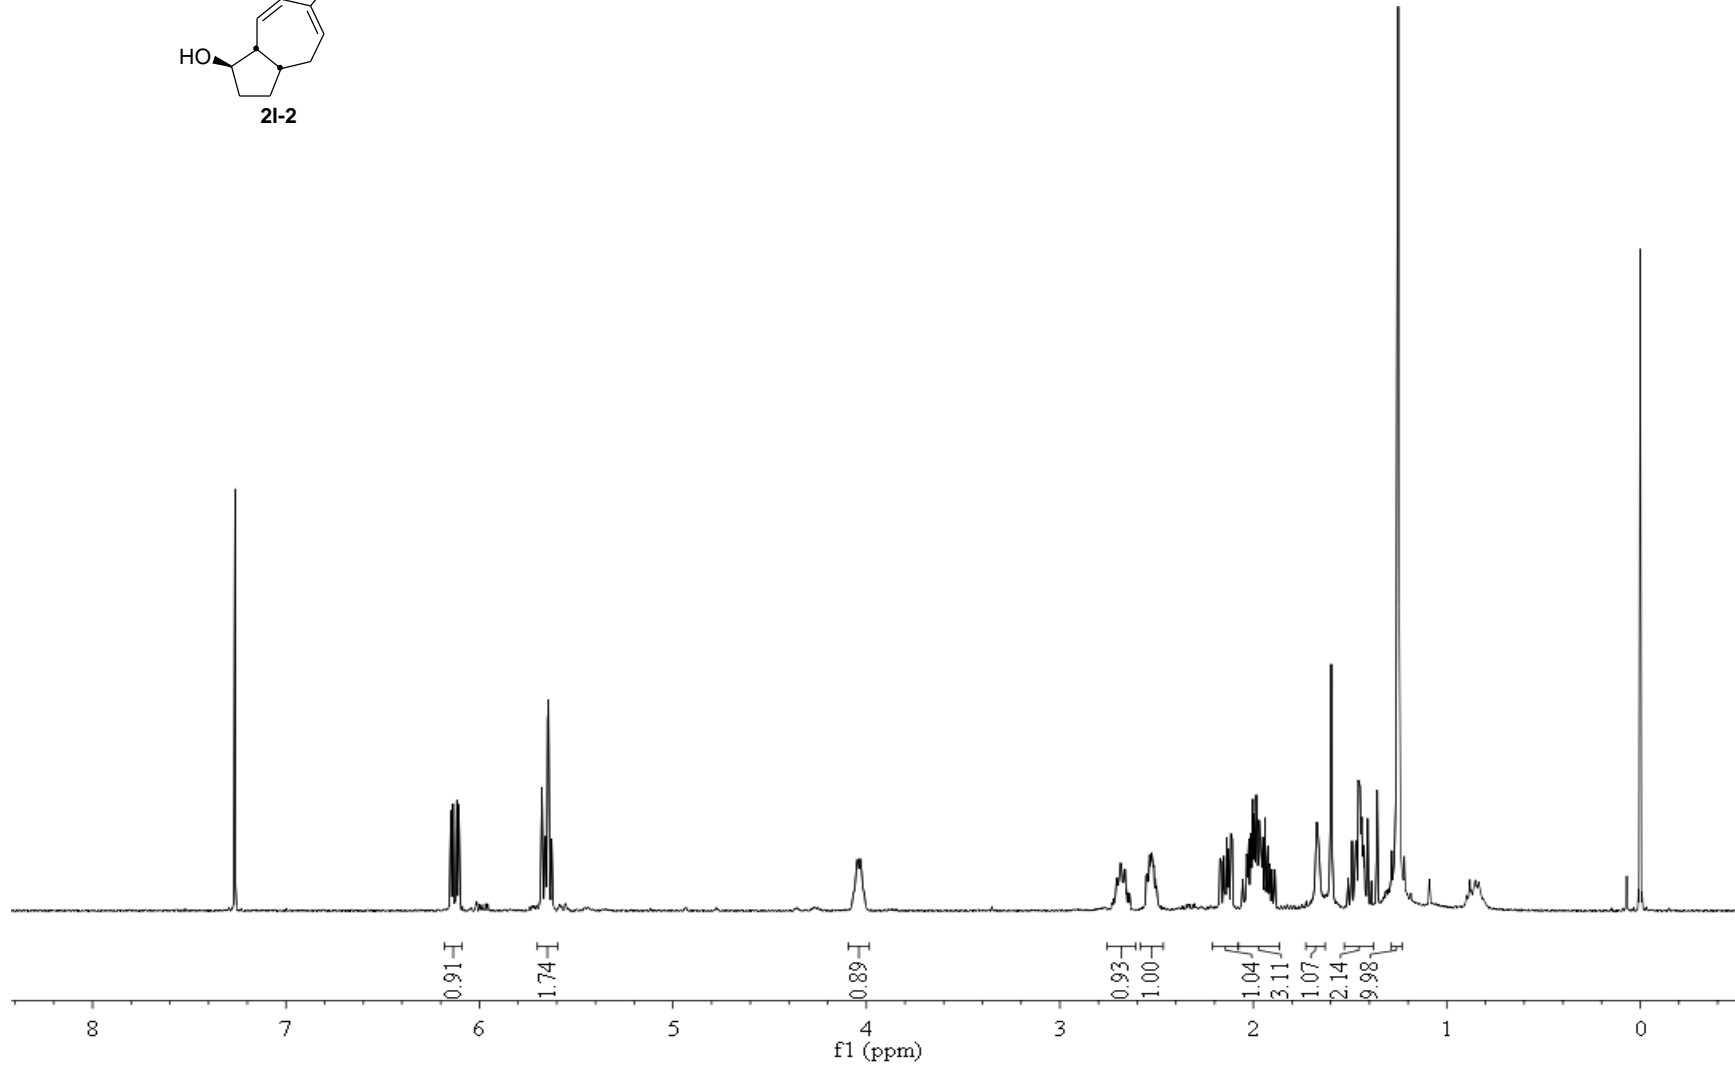

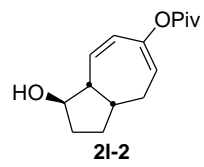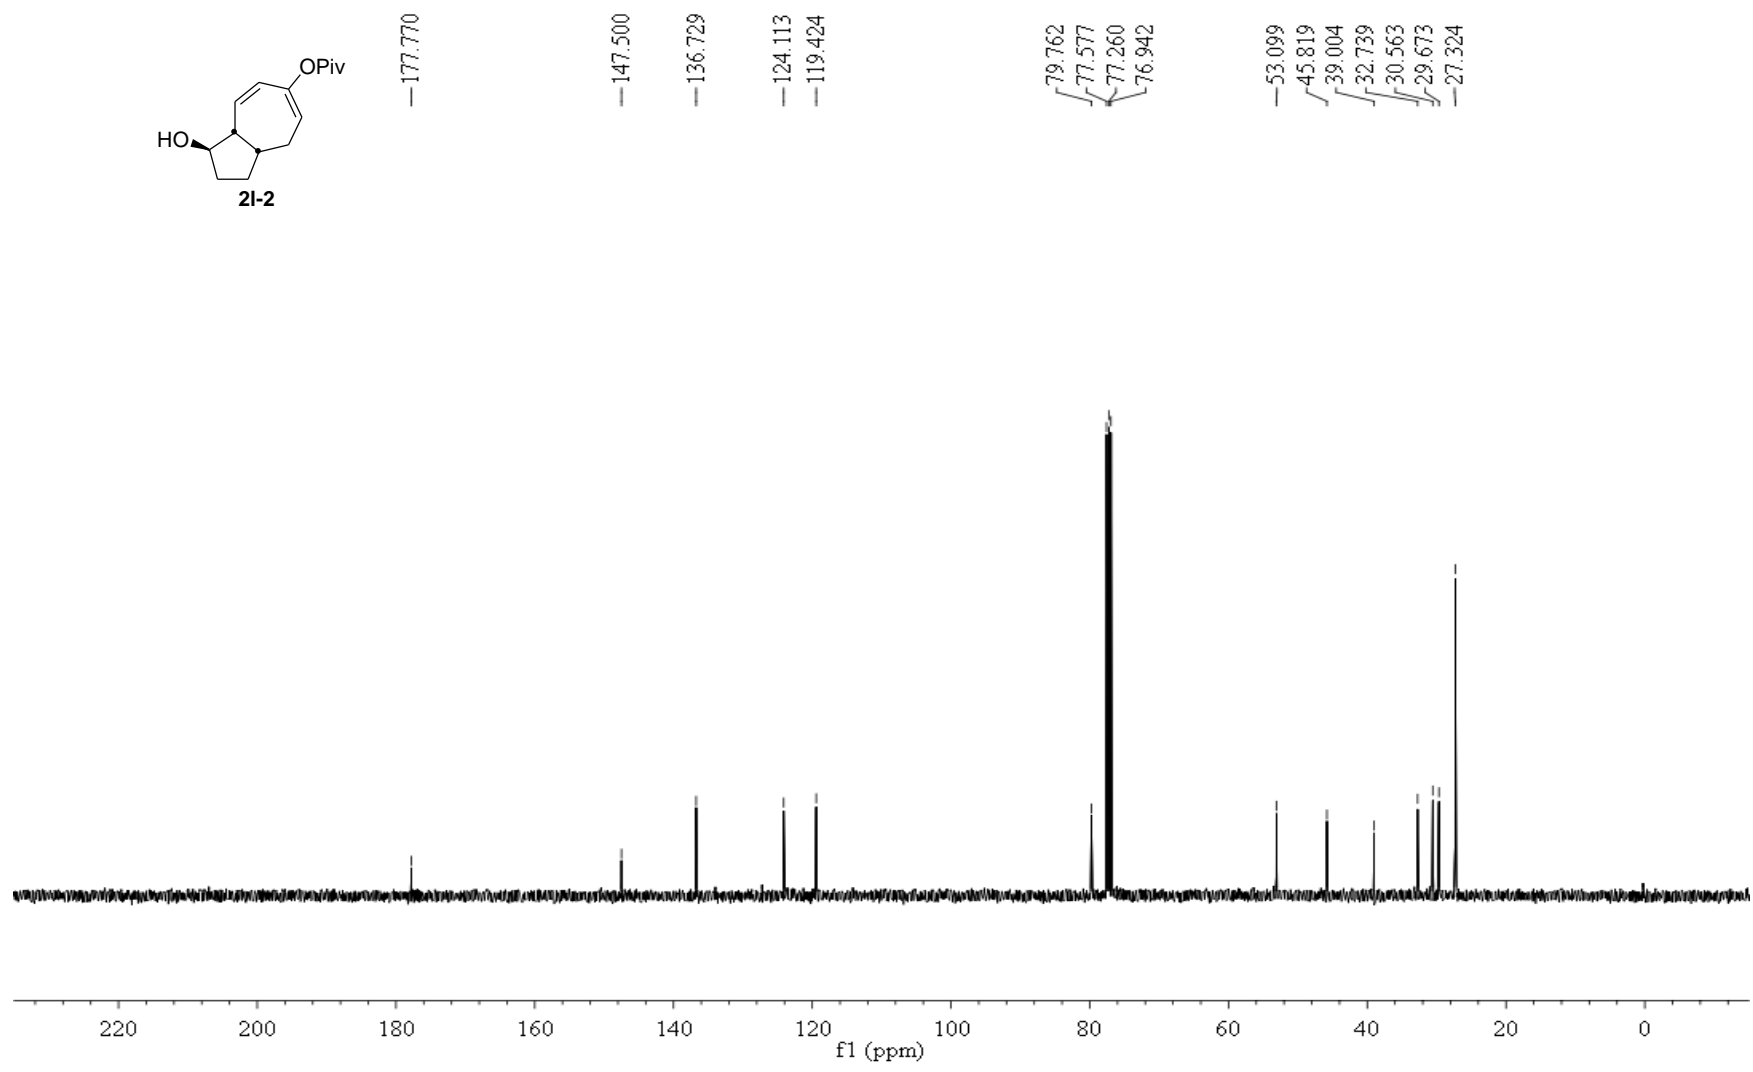

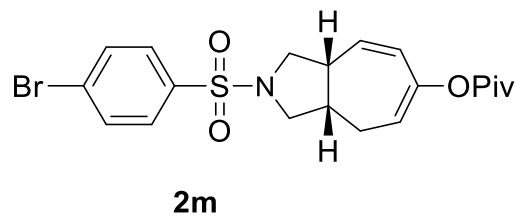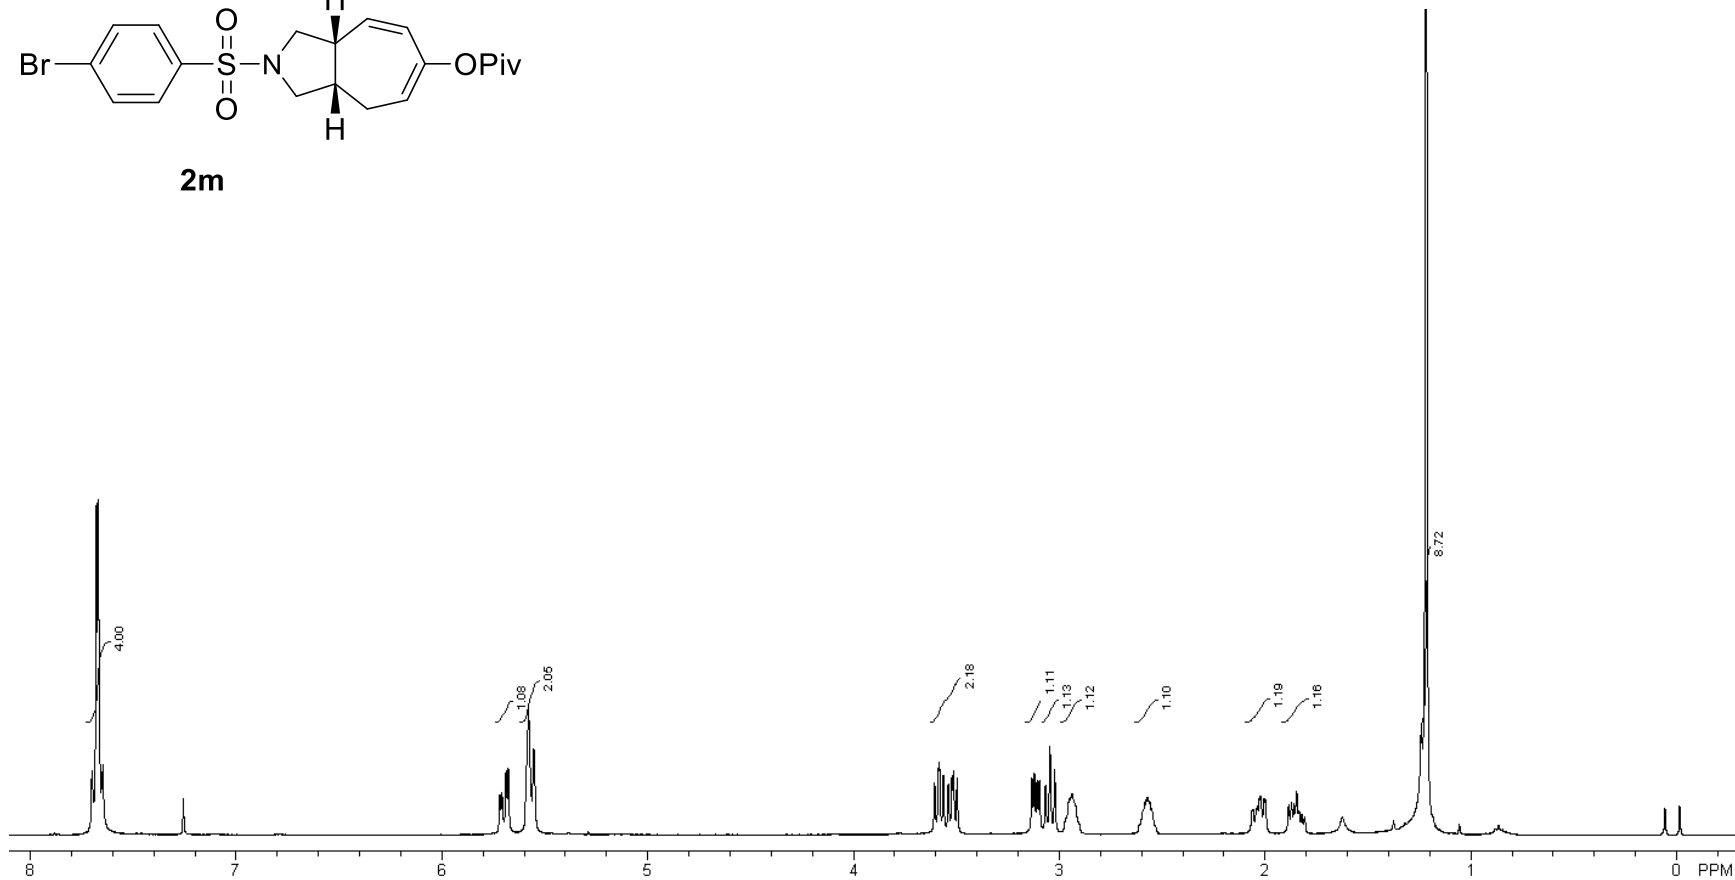

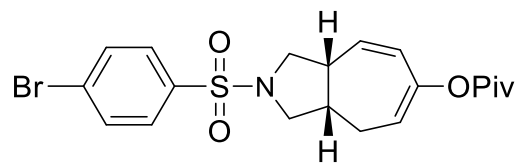

2m

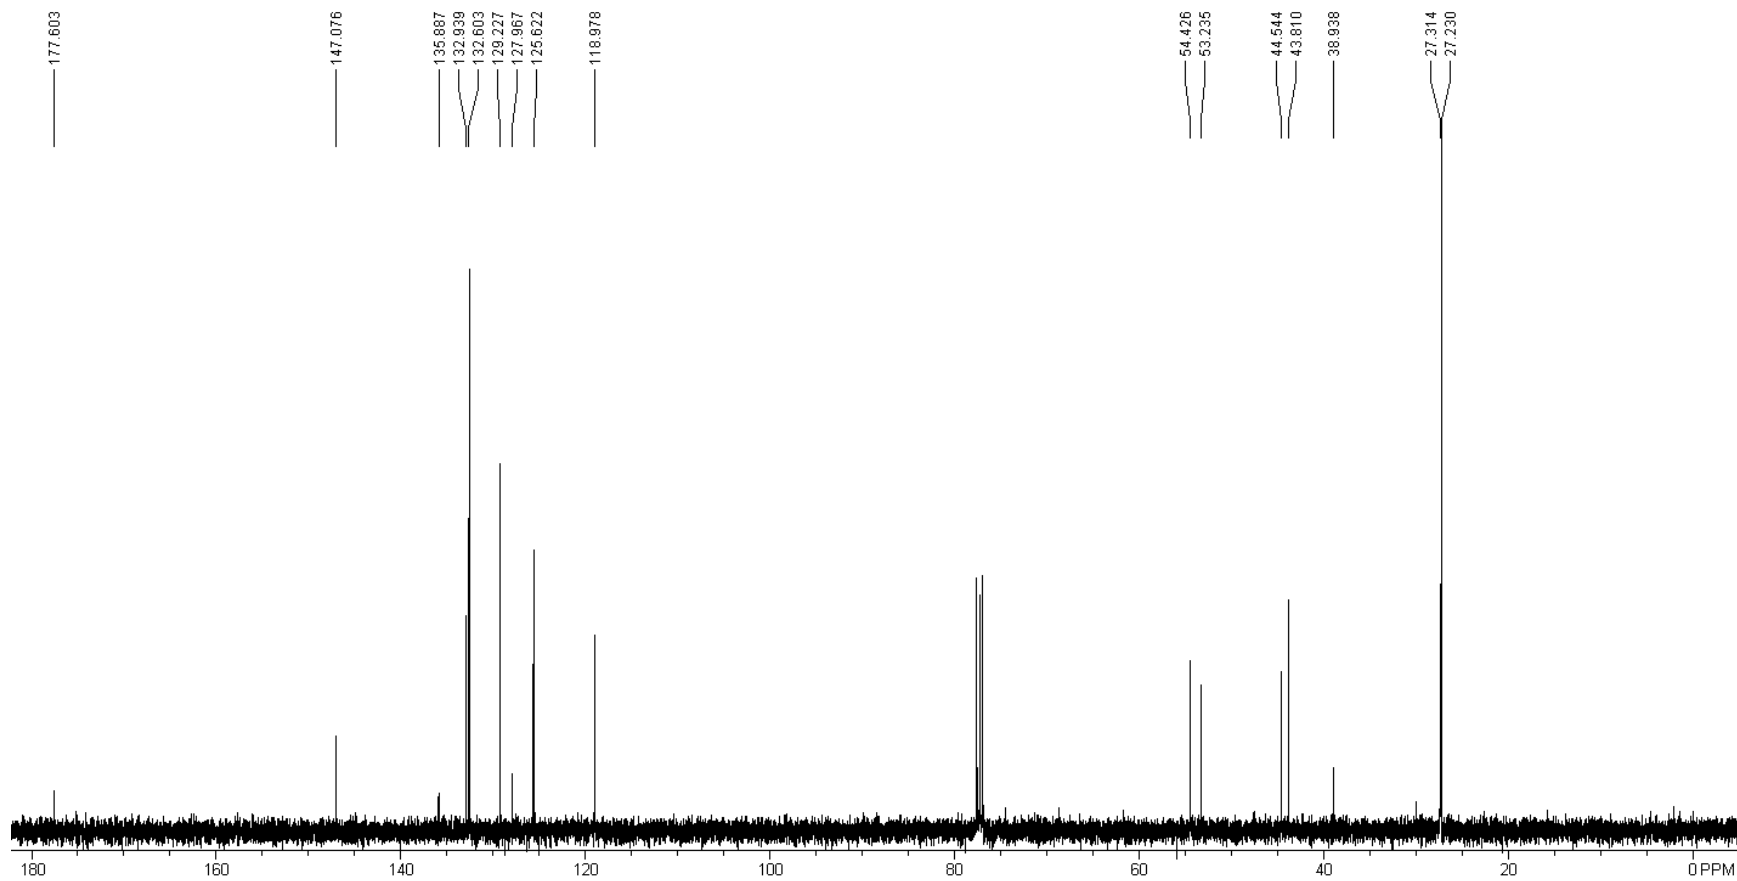

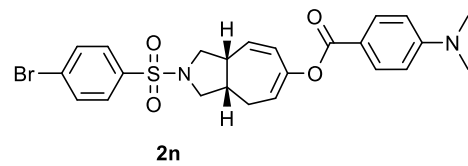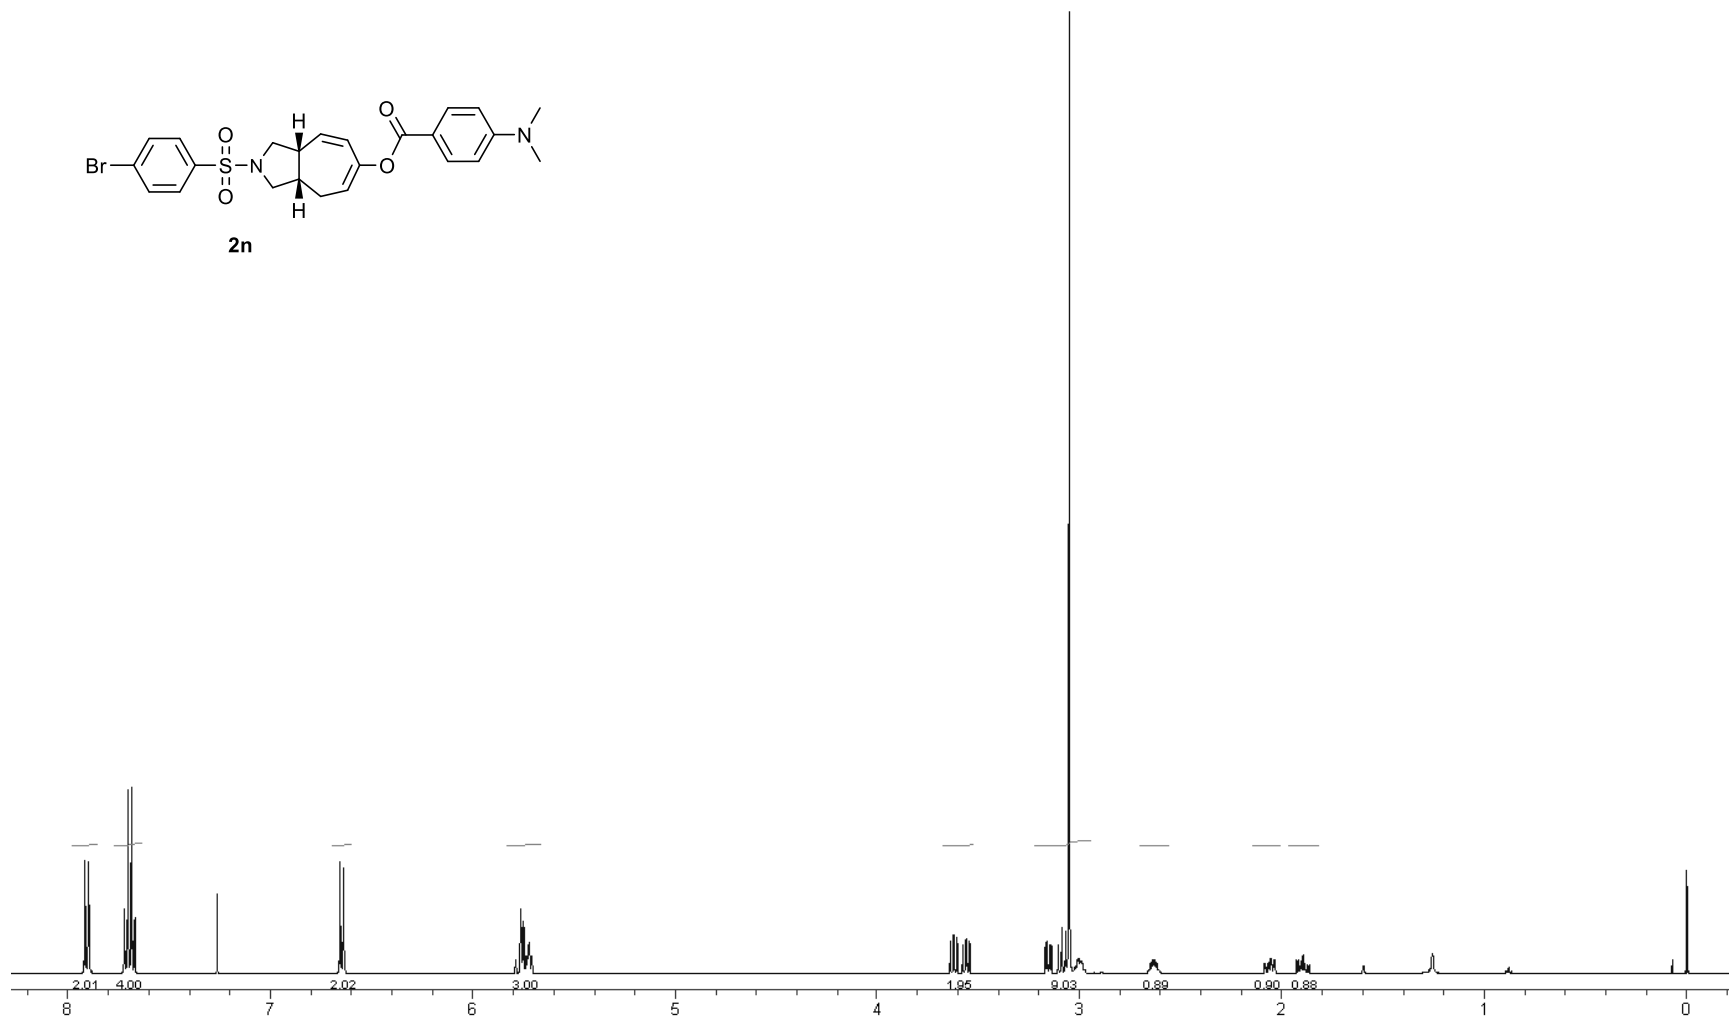

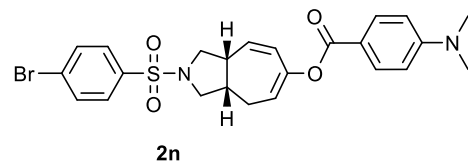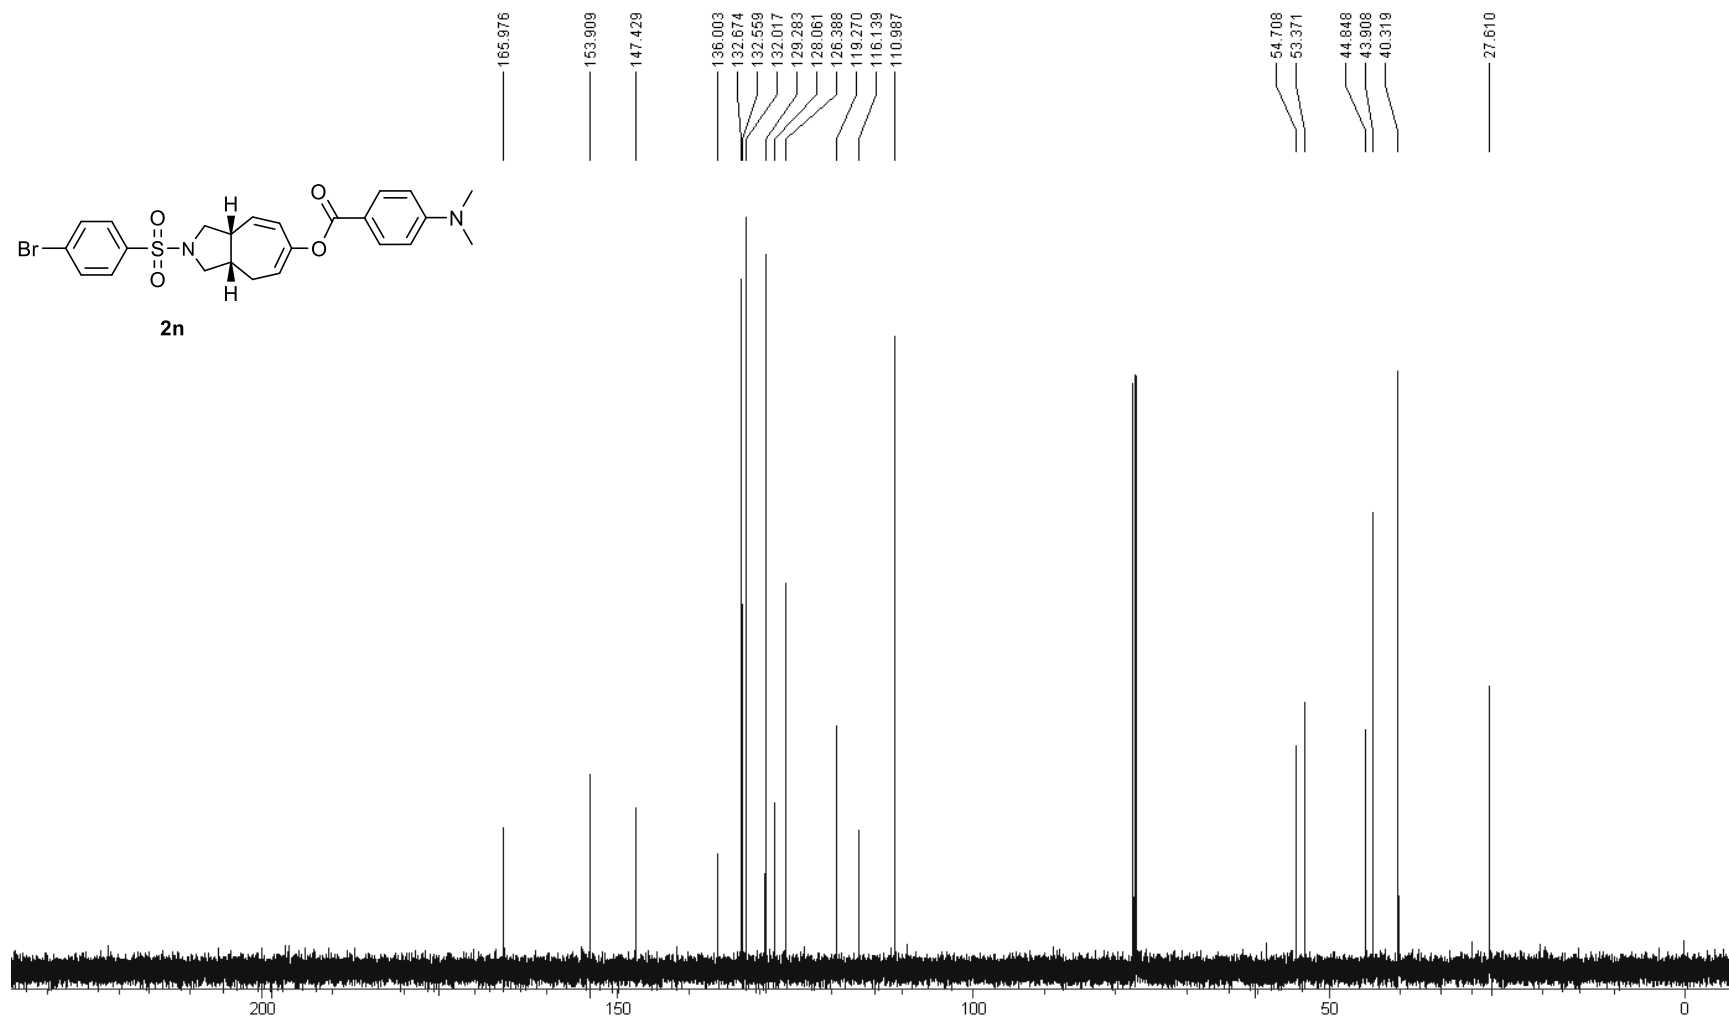

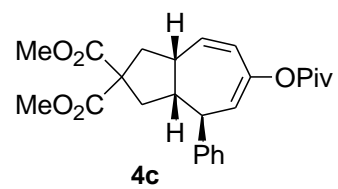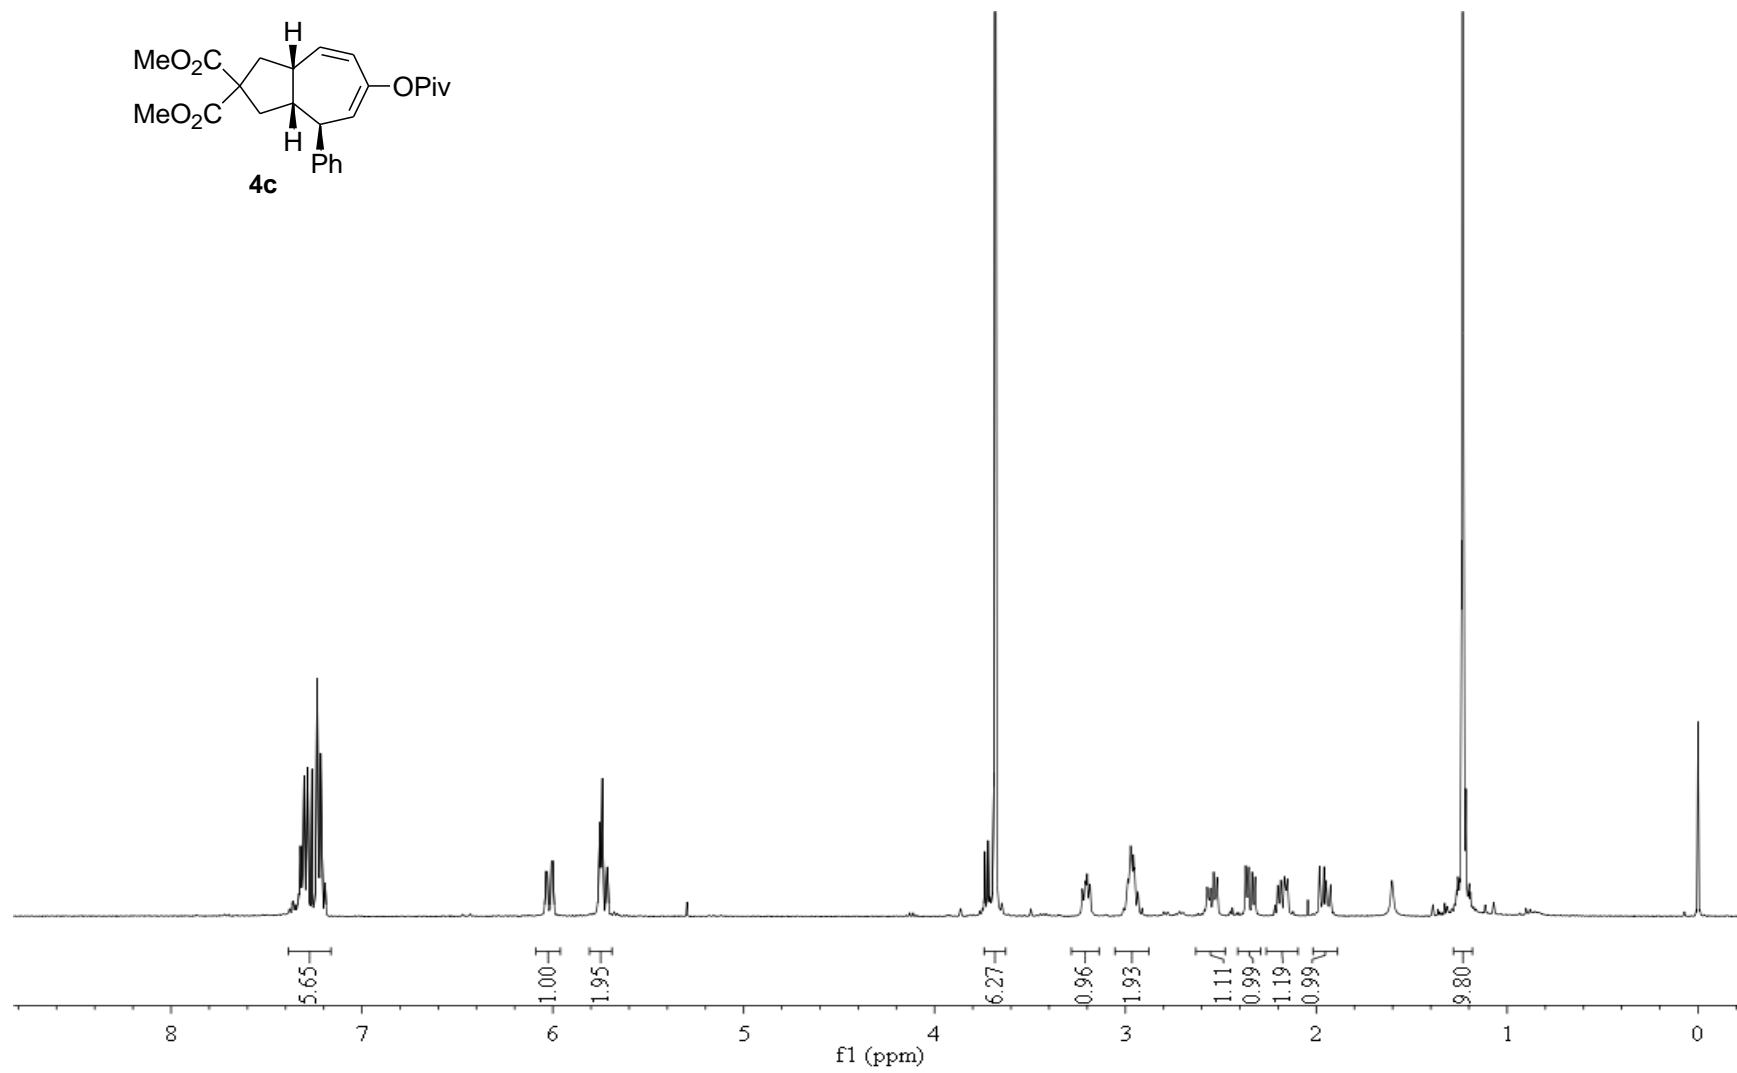



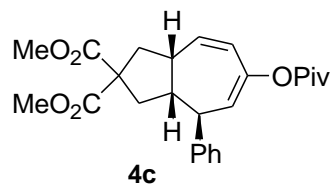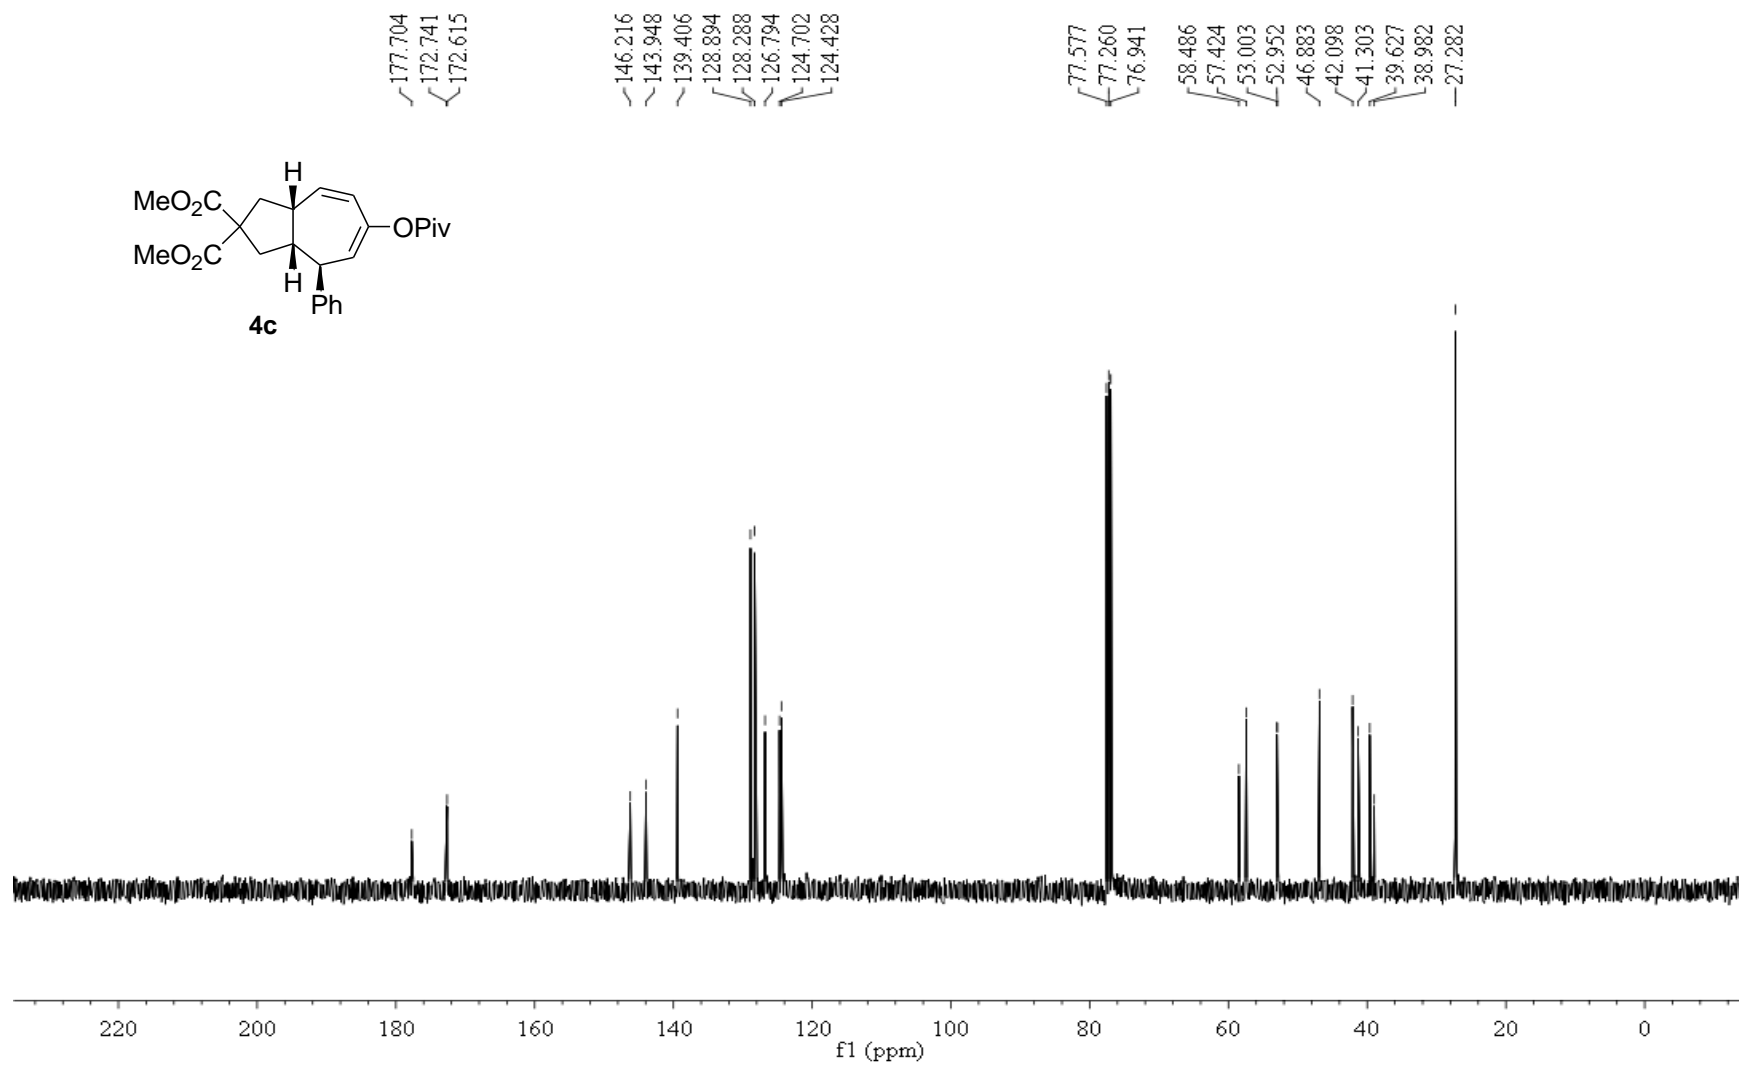

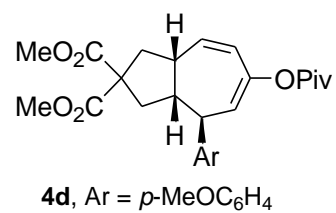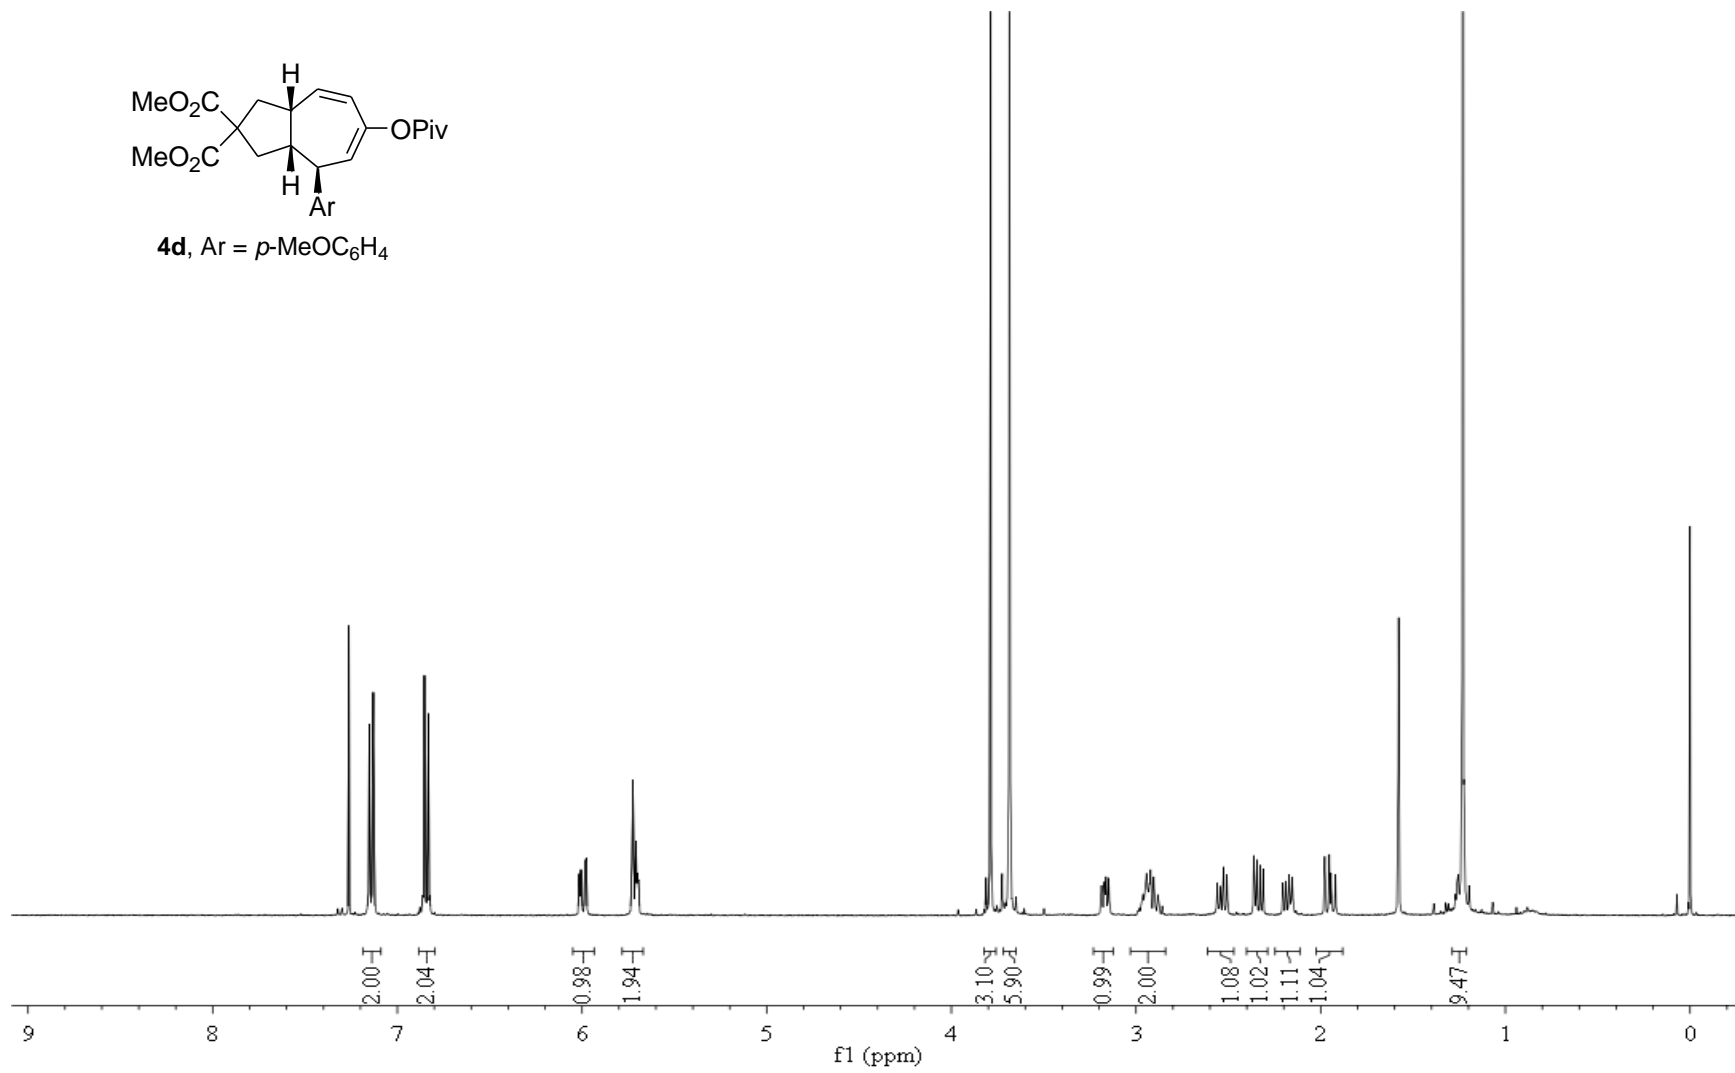

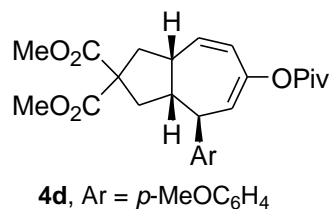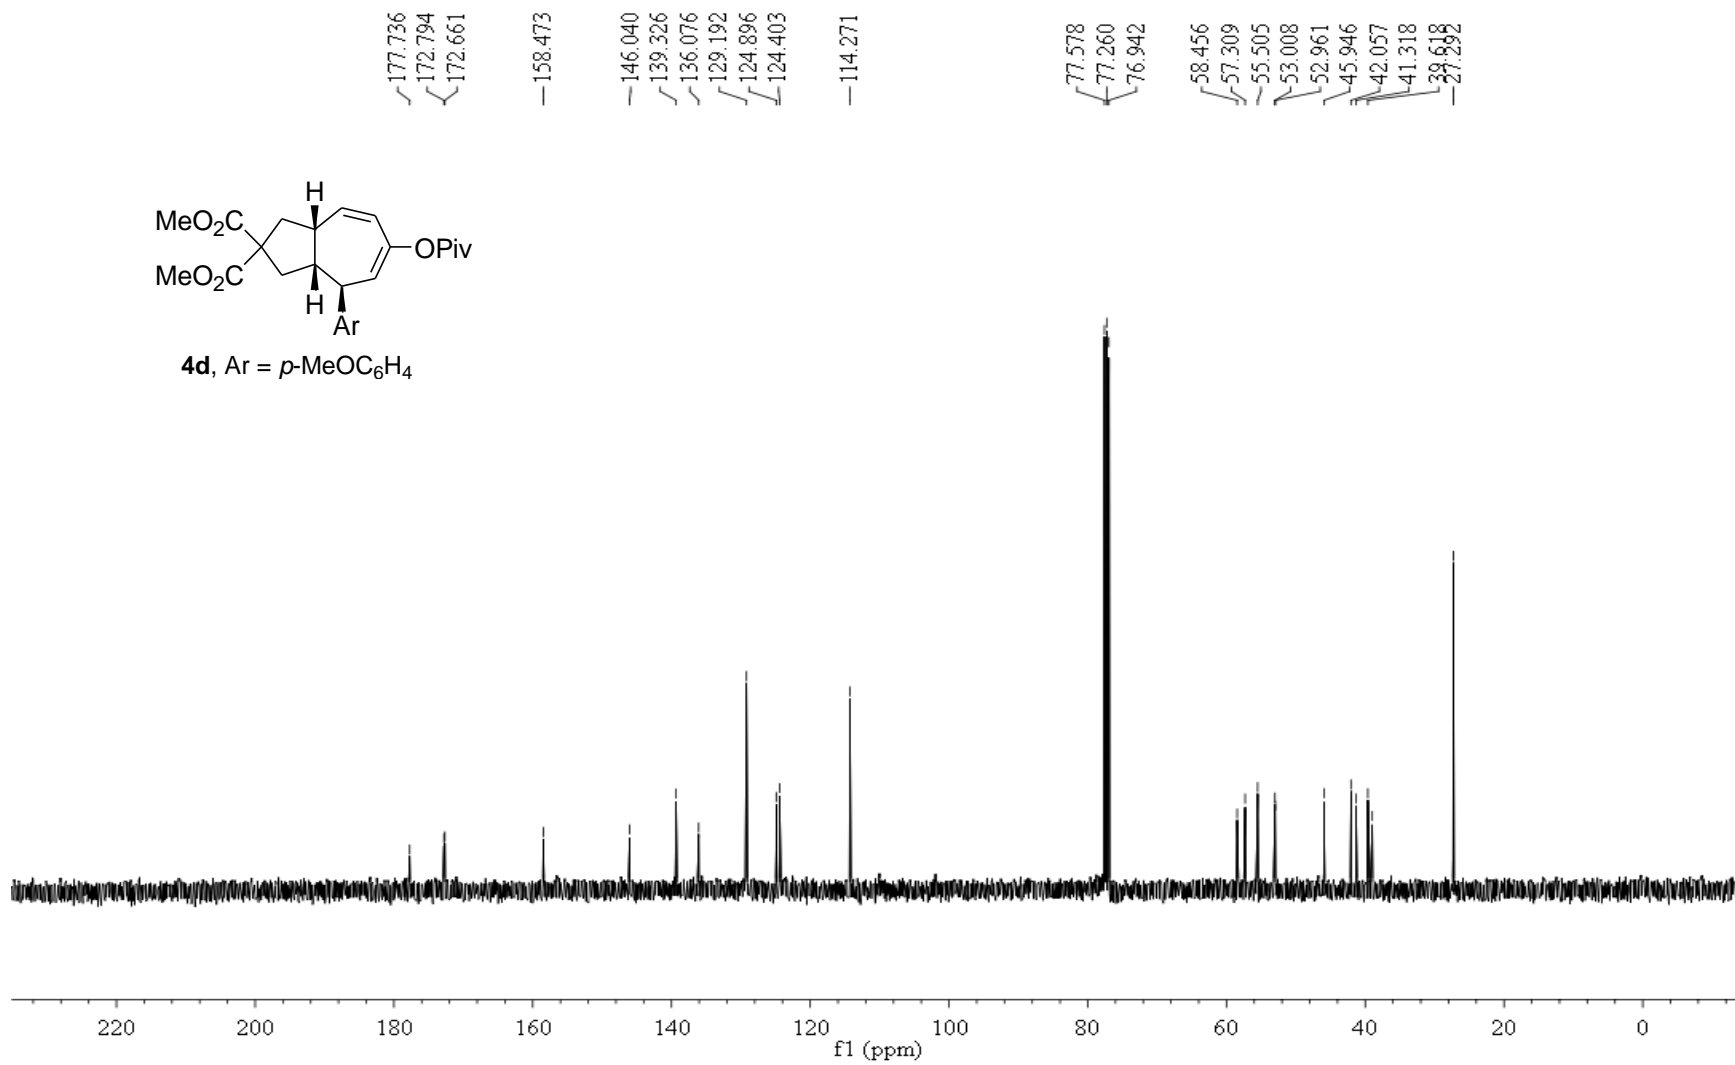

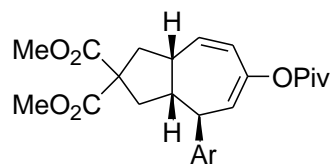

**4e**, Ar = *p*-BrC<sub>6</sub>H<sub>4</sub>

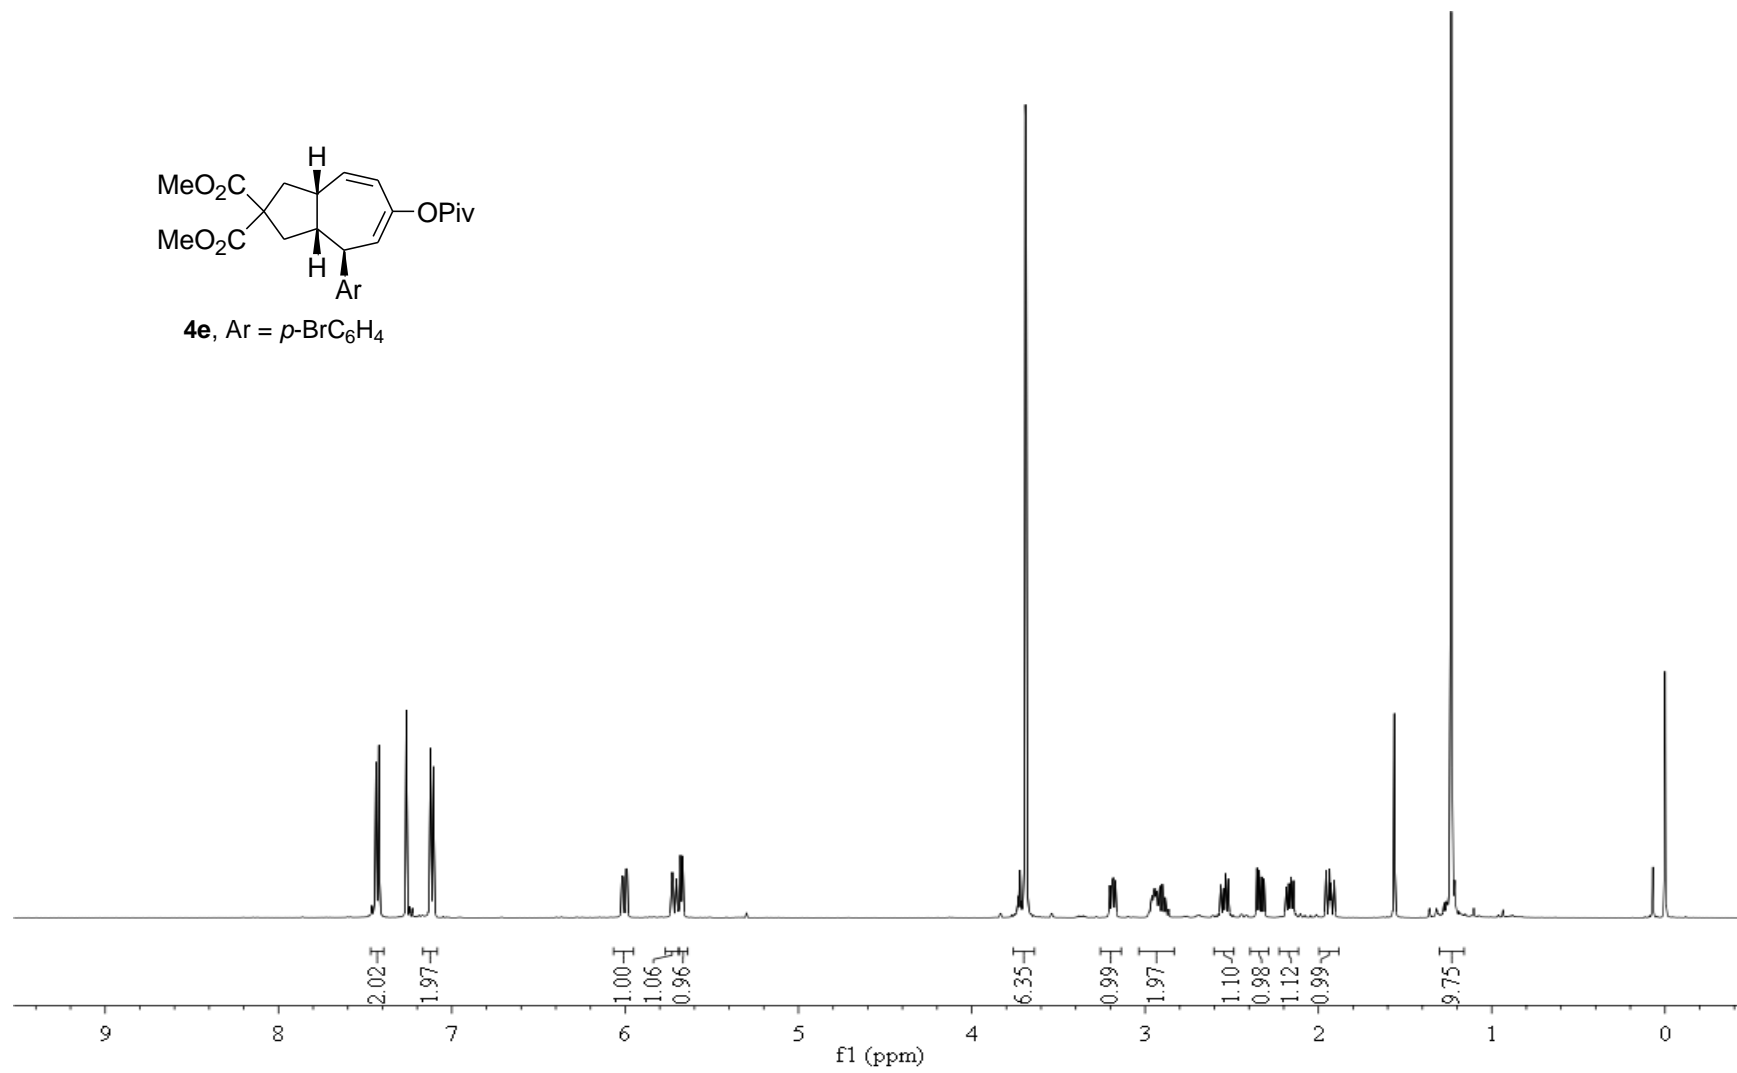

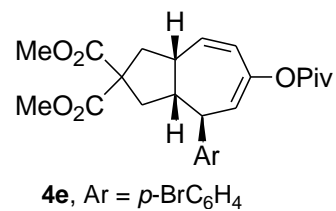

177.695  
172.674  
172.536

146.532  
142.945  
139.495  
132.006  
130.034  
124.431  
123.874  
120.652

77.514  
77.260  
77.005

58.433  
57.176  
53.066  
53.018  
46.254  
42.049  
41.224  
39.537  
39.008  
27.282

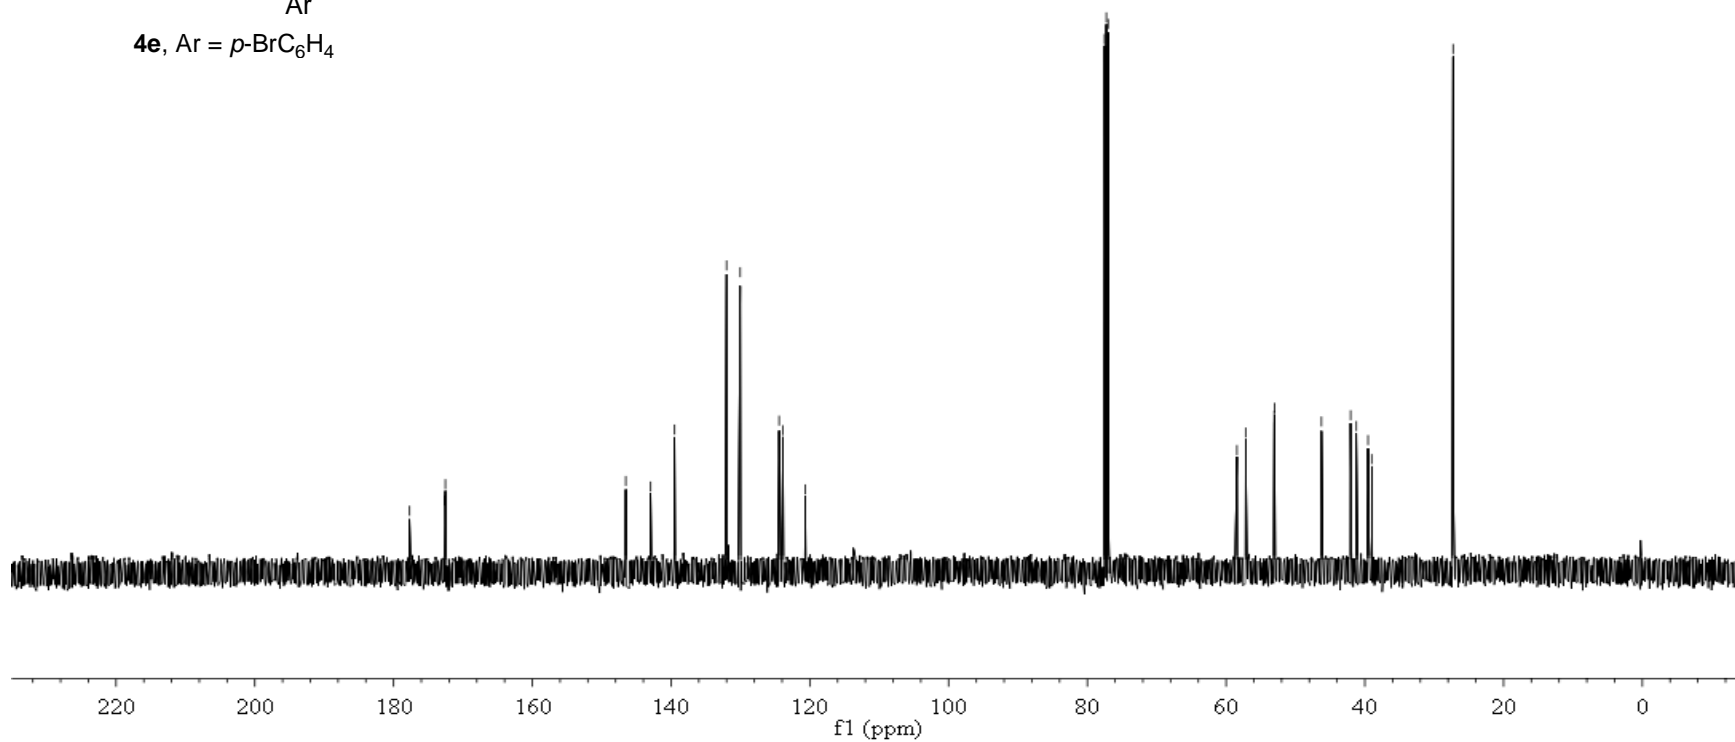

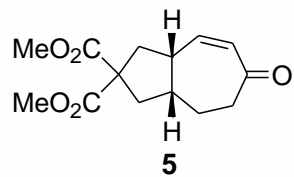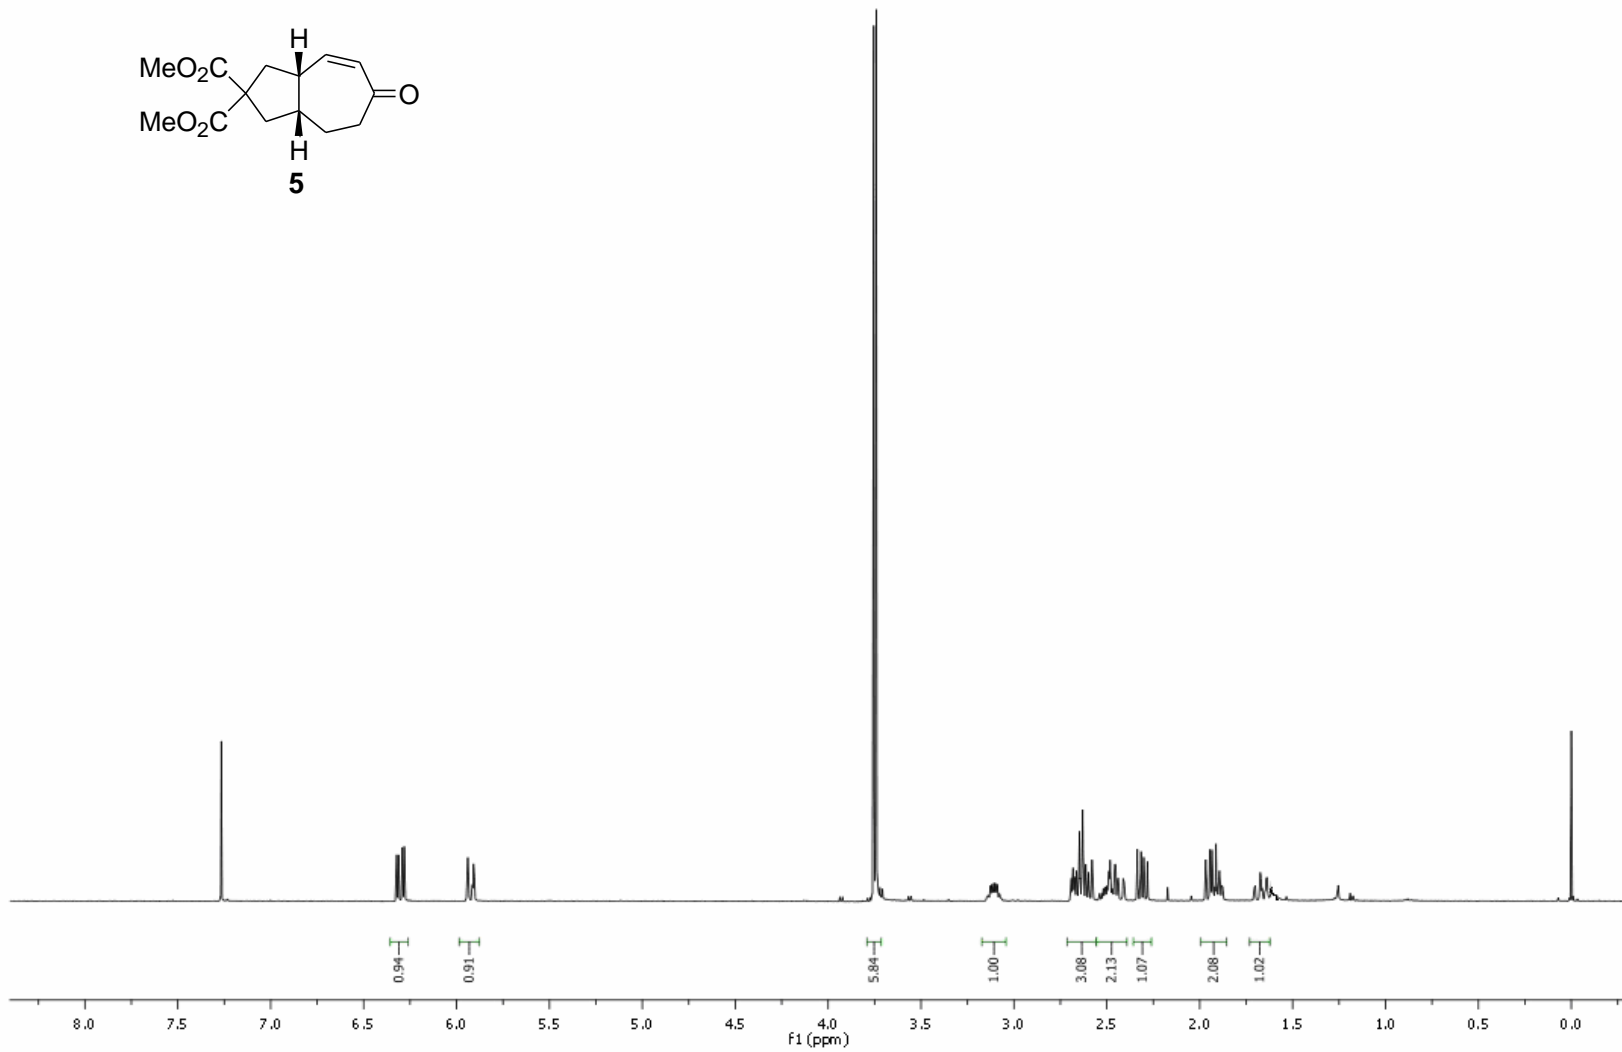

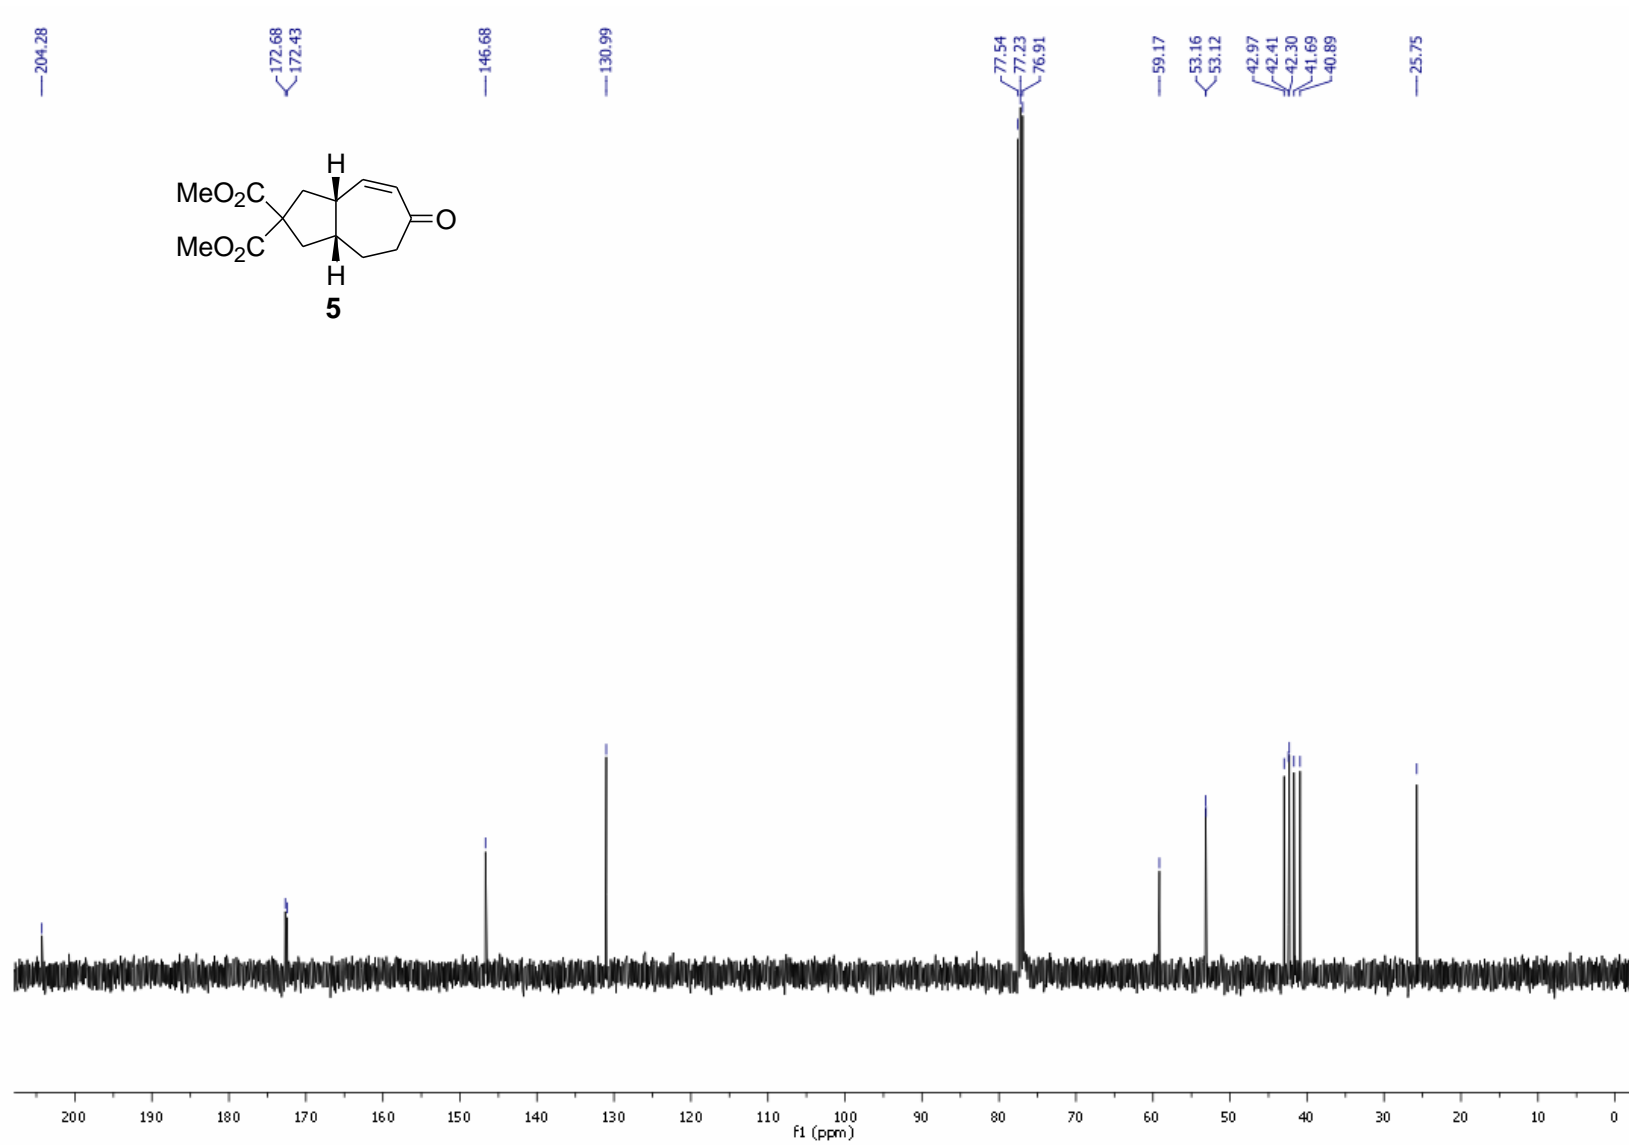

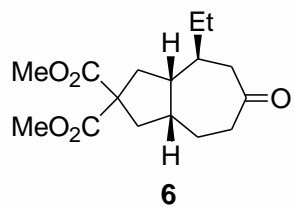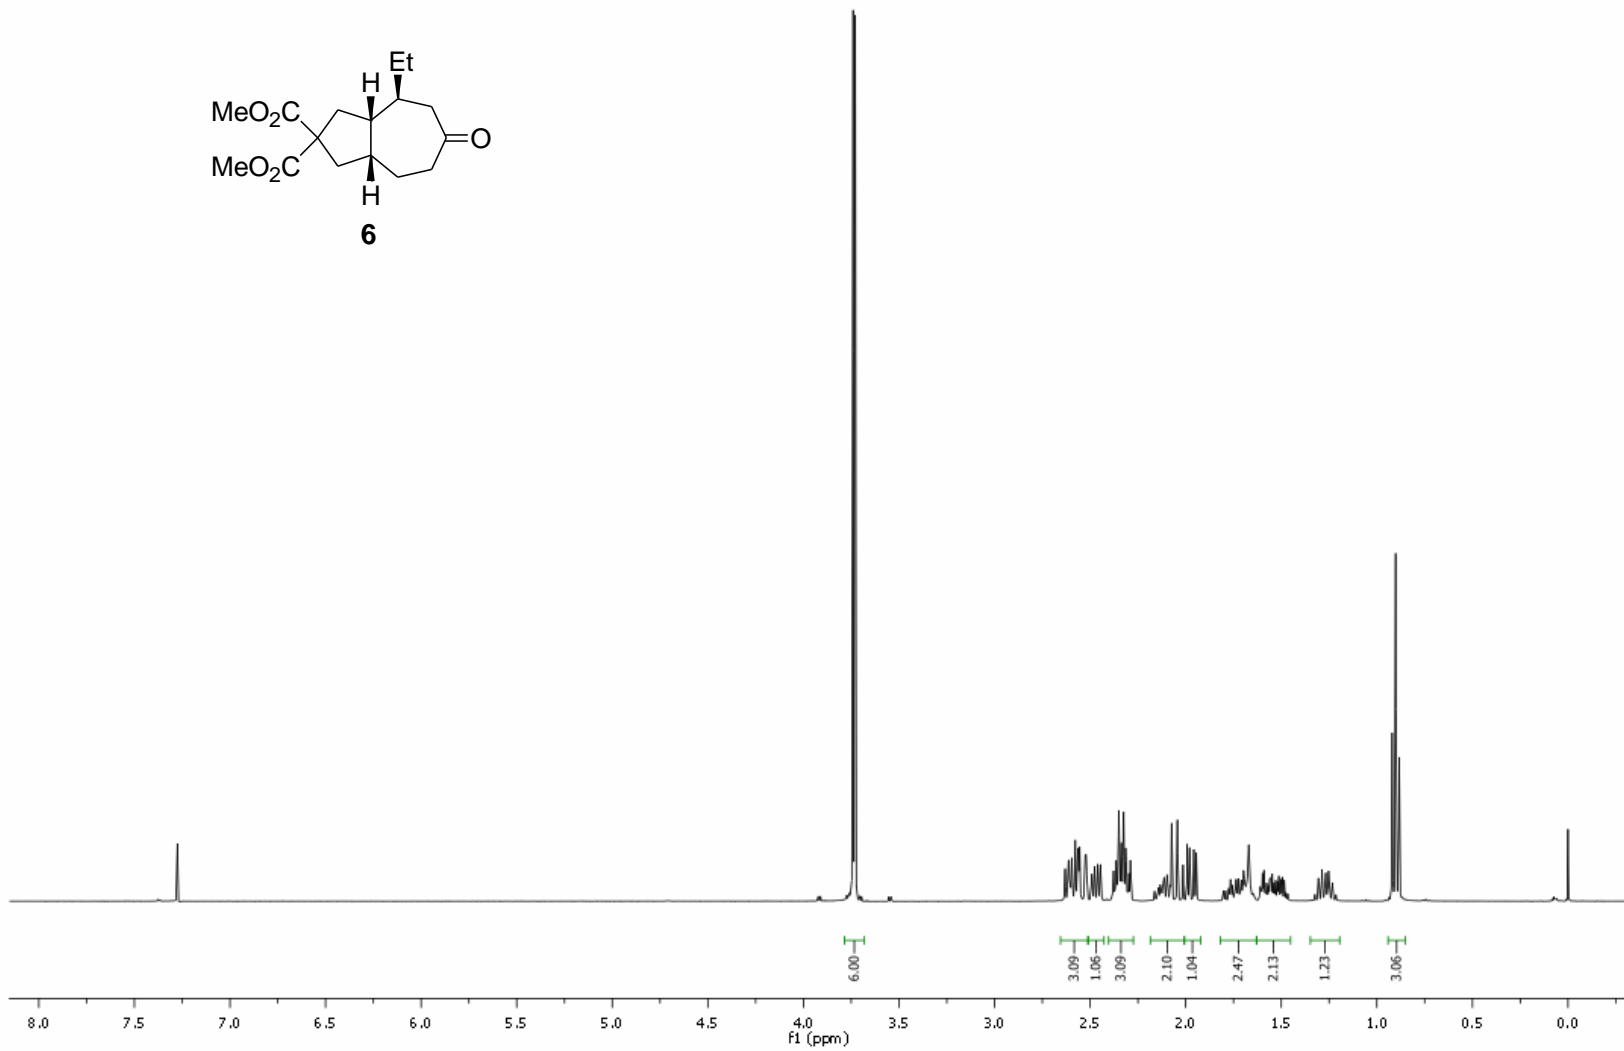



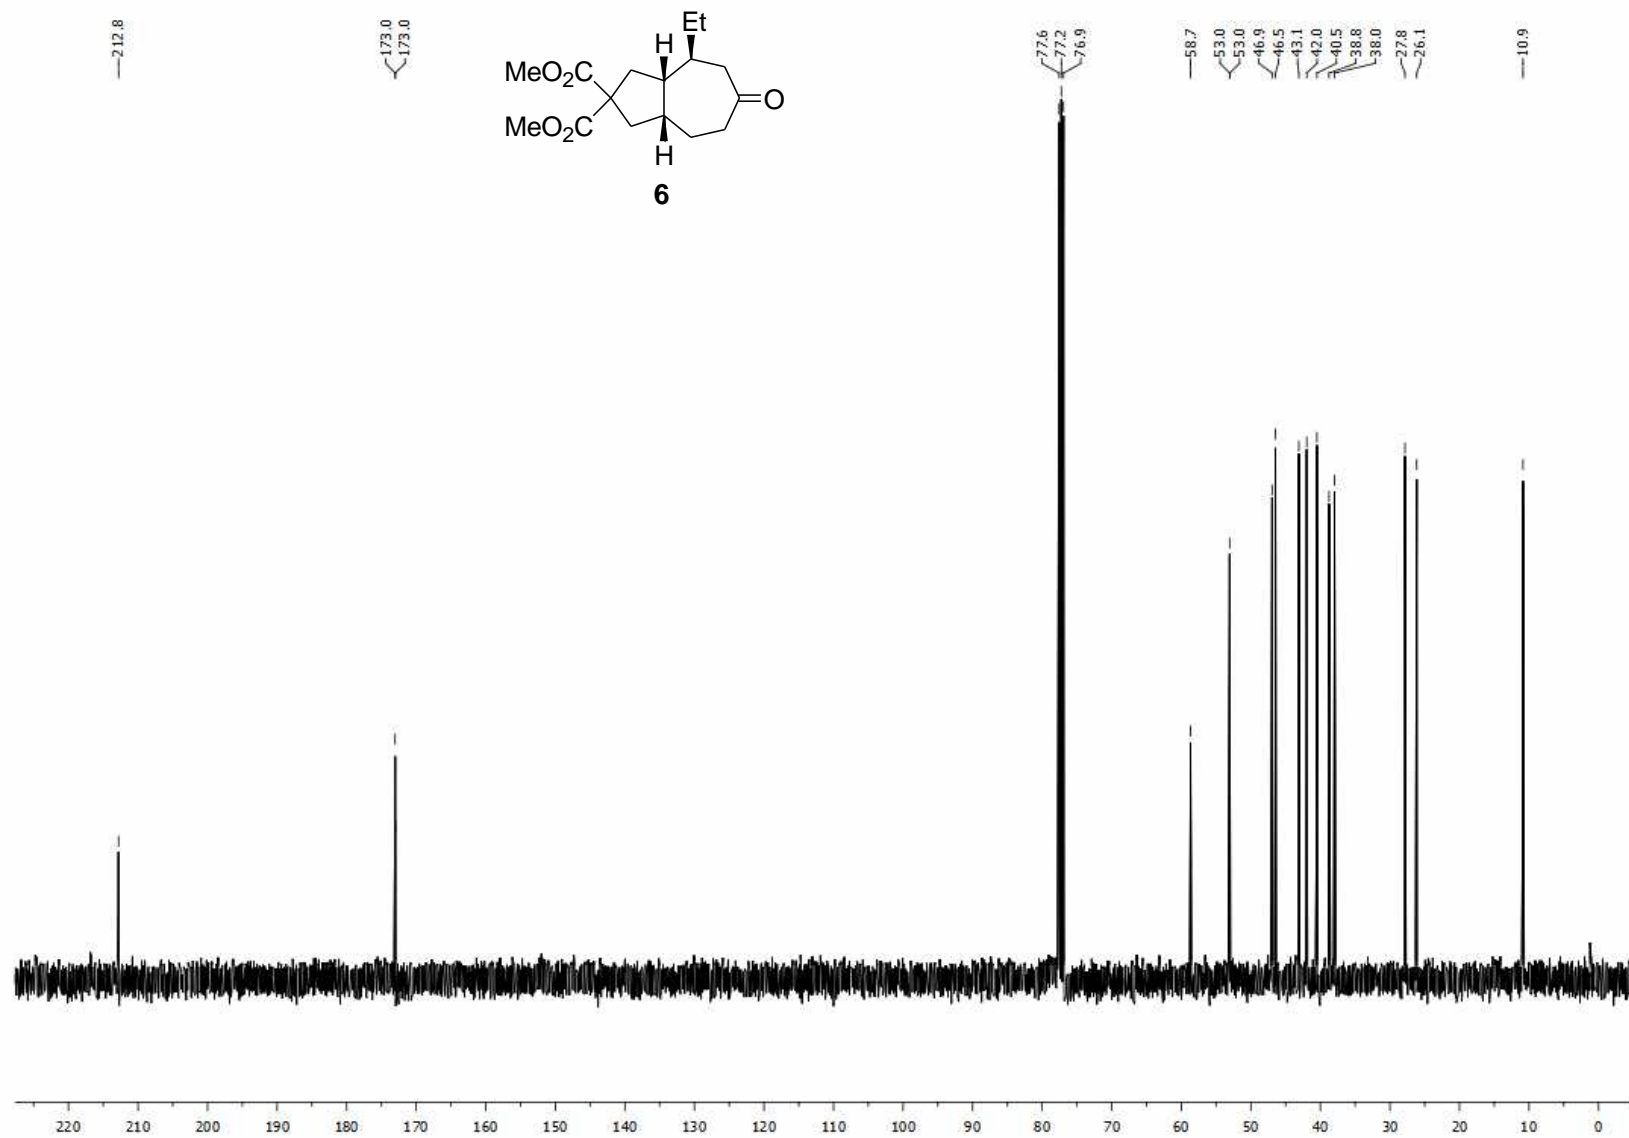

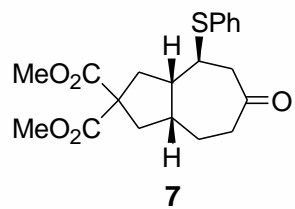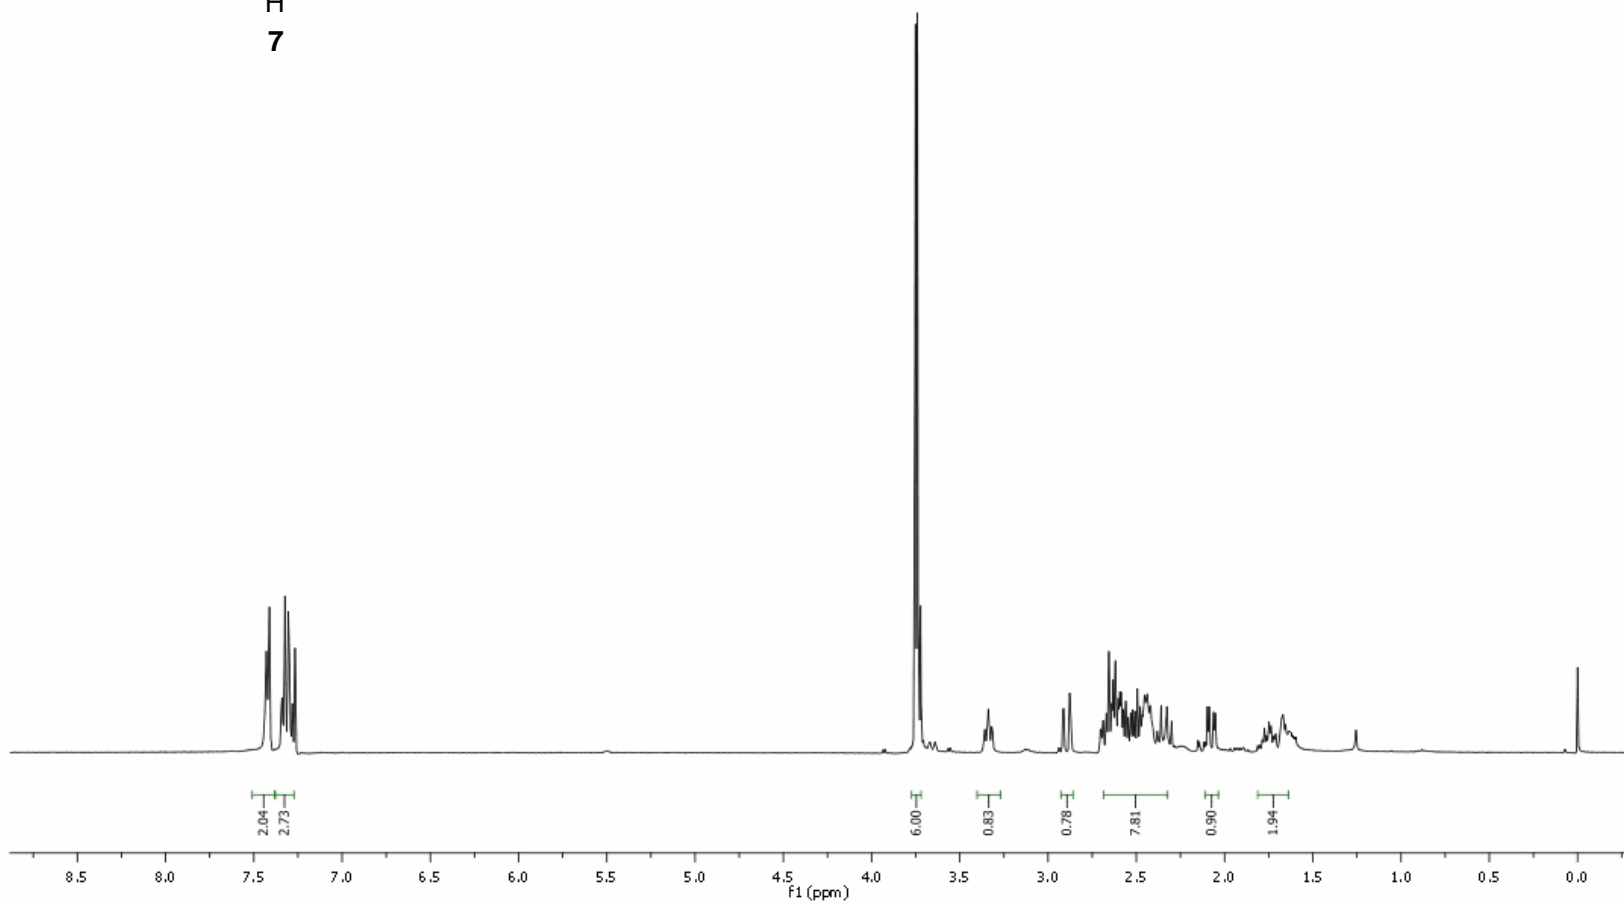

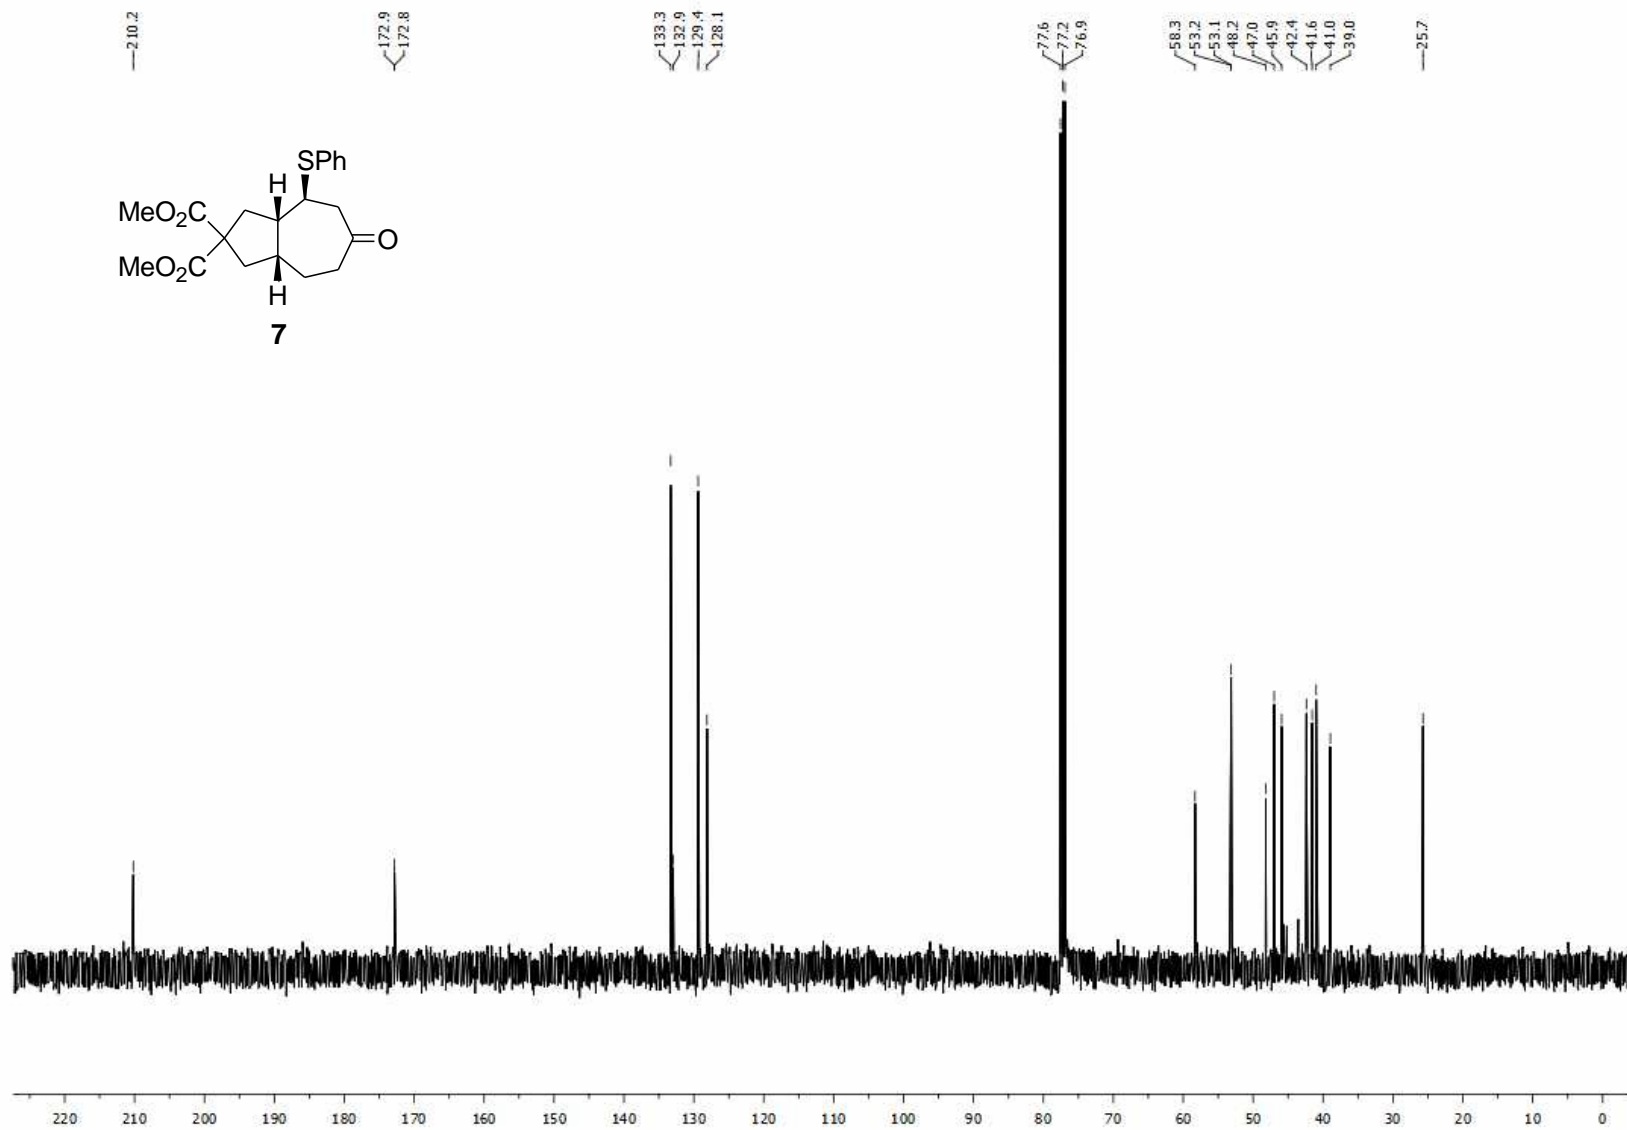

Supplement: NIHMS728789-supplement-Supplementary_File.pdf [file NIHMS728789-supplement-Supplementary_File.pdf]
